# Supplementary material for: European Respiratory Society guideline on non-CPAP therapies for obstructive sleep apnoea
Source: PubMed Central journal article supplement — Eur Respir Rev. 2021 Dec 1;30(162):210200. doi: 10.1183/16000617.0200-2021 (PMC9489103; doi:10.1183/16000617.0200-2021), 2021-12-01
Supplement: ERR-0200-2021.SUPPLEMENT.pdf [file ERR-0200-2021.SUPPLEMENT.pdf]

# European Respiratory Society guideline on non-CPAP therapies for obstructive sleep apnoea

## Supplementary Material

Winfried Randerath\*<sup>1</sup>, Johan Verbraecken\*<sup>2</sup>, Christel de Raaff<sup>3</sup>, Jan Hedner<sup>4</sup>, Simon Herkenrath<sup>1</sup>, Winfried Hohenhorst<sup>5</sup>, Tina Jakob<sup>6</sup>, Oreste Marrone<sup>7</sup>, Marie Marklund<sup>8</sup>, Walter T. McNicholas<sup>9</sup>, Rebecca L. Morgan<sup>10</sup>, Jean-Louis Pepin<sup>11</sup>, Sofia Schiza<sup>12</sup>, Nicole Skoetz<sup>6</sup>, Dan Smyth<sup>13</sup>, Jörg Steier<sup>14</sup>, Thomy Tonia<sup>15</sup>, Wojciech Trzepizur<sup>16</sup>, Piet-Heijn van Mechelen<sup>17</sup>, Peter Wijkstra<sup>18</sup>

\* co-shared first authorship

1. Bethanien Hospital, Clinic of Pneumology and Allergology, Center for Sleep Medicine and Respiratory Care, Institute of Pneumology at the University of Cologne, Solingen, Germany
2. Antwerp University Hospital and University of Antwerp, Edegem (Antwerp), Belgium
3. Amsterdam UMC, Department of Surgery, Amsterdam, the Netherlands
4. Department of Sleep Medicine, Respiratory Medicine and Allergology, Sahlgrenska University Hospital, Gothenburg, Sweden
5. Alfried Krupp Hospital, Department of Otolaryngology, Essen, Germany
6. Evidence-based Oncology, Department I of Internal Medicine, Center for Integrated Oncology Aachen Bonn Cologne Duesseldorf, Faculty of Medicine and University Hospital Cologne, University of Cologne, Cologne, Germany
7. National Research Council of Italy, Institute for Biomedical Research and Innovation, Palermo, Italy
8. Department of Odontology, Faculty of Medicine, Umeå University, Umeå, Sweden
9. School of Medicine, University College Dublin, and Department of Respiratory and Sleep Medicine, St. Vincent's Hospital Group, Dublin, Ireland
10. Faculty of Health Sciences, McMaster University, Hamilton, Ontario, Canada
11. EFCR Sleep and Respiration Unit CHU Grenoble, France

12. Sleep Disorders Unit, Department of Respiratory Medicine, Medical School, University of Crete, Greece.
13. European Lung Foundation, Sheffield, UK, Sleep Disorder Support Foundation, Dublin, Ireland
14. Lane Fox Unit and Sleep Disorders Centre at Guy's & St Thomas' NHS Foundation Trust, Centre for Human & Applied Physiological Sciences, King's College London, London, UK
15. Institute of Social and Preventive Medicine, University of Bern, Switzerland
16. Department of Respiratory and Sleep Medicine, Angers University hospital, Angers, France
17. European Lung Foundation, Sheffield, UK.
18. Department of Pulmonary Diseases, University of Groningen, University Medical Center Groningen, Groningen, The Netherlands

**Key words:** Mandibular advancement device, positional therapy, muscle stimulation, pharmaceutical therapy, maxillo-mandibular osteotomy, bariatric surgery

### **Corresponding author**

Winfried Randerath, Bethanien Hospital, Clinic of Pneumology and Allergology, Center for Sleep Medicine and Respiratory Care, Institute of Pneumology at the University of Cologne, Solingen, Germany. Tel.: 0049.212.63.6002, Fax: 0049.212.636005. Email: randerath@klinik-bethanien.de

### **Sources of financial support**

The participants of the project received funding for travel and meetings from the European Respiratory Society (no TF-2018-01).

### **Conflict of interest**

Winfried Randerath reports personal fees and travel grants from Weinmann, Heinen & Löwenstein, Resmed, Philips Respironics, Inspire and Bioprojet; Johan Verbraecken reports institutional fees and educational grants from Accuramed, Agfa-

Gevaert, AirLiquide, AstraZen, Bekaert Deslee Academy, Bioprojet, Desitin, Fisher & Paykel, Heinen & Löwenstein, Idorsia, Inspire, Jazz Pharmaceuticals, Medidis, Mediq Tefa, NightBalance, OSG, Philips Respironics, ResMed, Sanofi, SomnoMed, Springer, Total Care, UCB Pharma, Vivisol, Wave Medical, and Westfalen Medical; Jan Hedner reports Grants from ResMed and ERS; Jean Louis Pepin reports Grants and research funds from (payments made to the institutions): Air Liquide Foundation, Agiradom, AstraZeneca, Fisher and Paykel, Mutualia, Philips, Resmed, Vitalaire; Fees from: Agiradom, AstraZeneca, Boehringer Ingelheim, Jazz pharmaceutical, Night Balance, Philips, Resmed, Sefam; Nicole Skoets reports Grants or contracts from Cochrane; Joerg Steier reports research grants from the British Lung Foundation and a pending patent for Guy's & St Thomas' NHS Foundation Trust and King's College London (WO2016124739A1), Thomy Tonia acts as ERS Methodologist, Wojciech Trzepizur reports travel grants from Asten.

Christel de Raaf, Simon Herkenrath, Winfried Hohenhorst, Tina Jakob, Oreste Marrone, Marie Marklund, Walter T. McNicholas, Rebecca Morgan, Sofia Schiza, Dan Smyth, Piet-Heijn van Mechelen, and Peter Wijkstra report no conflict of interest related to the manuscript.

## Abbreviations

|        |                                                                    |
|--------|--------------------------------------------------------------------|
| AE     | Adverse event                                                      |
| AHI    | Apnoea-Hypopnoea Index                                             |
| BMI    | Body Mass Index                                                    |
| BP     | Blood Pressure                                                     |
| BPAP   | Bilevel Positive Airway Pressure                                   |
| CI     | Confidence Interval                                                |
| CPAP   | Continuous Positive Airway Pressure                                |
| DISE   | Drug-induced Sleep Endoscopy                                       |
| ENT    | Ear Nose Throat                                                    |
| ESS    | Epworth Sleepiness Scale                                           |
| FOSQ   | Functional Outcomes of Sleep Questionnaire                         |
| h      | Hour                                                               |
| HNS    | Hypoglossal Nerve Stimulation                                      |
| HrQoL  | Health-related Quality of Life                                     |
| IQR    | Inter Quartile Range                                               |
| ITT    | Intention-to-treat                                                 |
| MA     | Meta-analysis                                                      |
| MAD    | Mandibular advancement device                                      |
| MMO    | Maxillo mandibular osteotomy                                       |
| N      | Number                                                             |
| NICE   | National Institute for Health and Care Excellence                  |
| ODI    | Oxygen Desaturation Index                                          |
| OSA(S) | Obstructive Sleep Apnoea (syndrome)                                |
| p      | Probability                                                        |
| PICO   | Population, Intervention, Control, Outcome                         |
| PRISMA | Preferred Reporting Items for Systematic Reviews and Meta-Analyses |
| PSG    | Polysomnography                                                    |
| PT     | Positional Therapy                                                 |
| RCT    | Randomised Controlled Trial                                        |
| RYGB   | Roux-en-Y Gastric Bypass Surgery                                   |

|       |                                                                               |
|-------|-------------------------------------------------------------------------------|
| SAE   | Severe adverse event                                                          |
| SD    | Standard Deviation                                                            |
| SEI   | Sleep Efficiency                                                              |
| SF-36 | Short-form Questionnaire 36                                                   |
| STAR  | Stimulation Therapy for Apnea Reduction                                       |
| TENS  | Transcutaneous electrical nerve stimulation                                   |
| TESLA | Domiciliary Transcutaneous Electrical Stimulation in Obstructive Sleep Apnoea |
| TF    | Task Force                                                                    |
| USA   | United States of America                                                      |

**Flow diagrams**

**Figure e1: PICO 1: In adult obese patients with OSA, should laparoscopic Roux-en-Y gastric bypass surgery (RYGB) or weight reducing diet be used?**

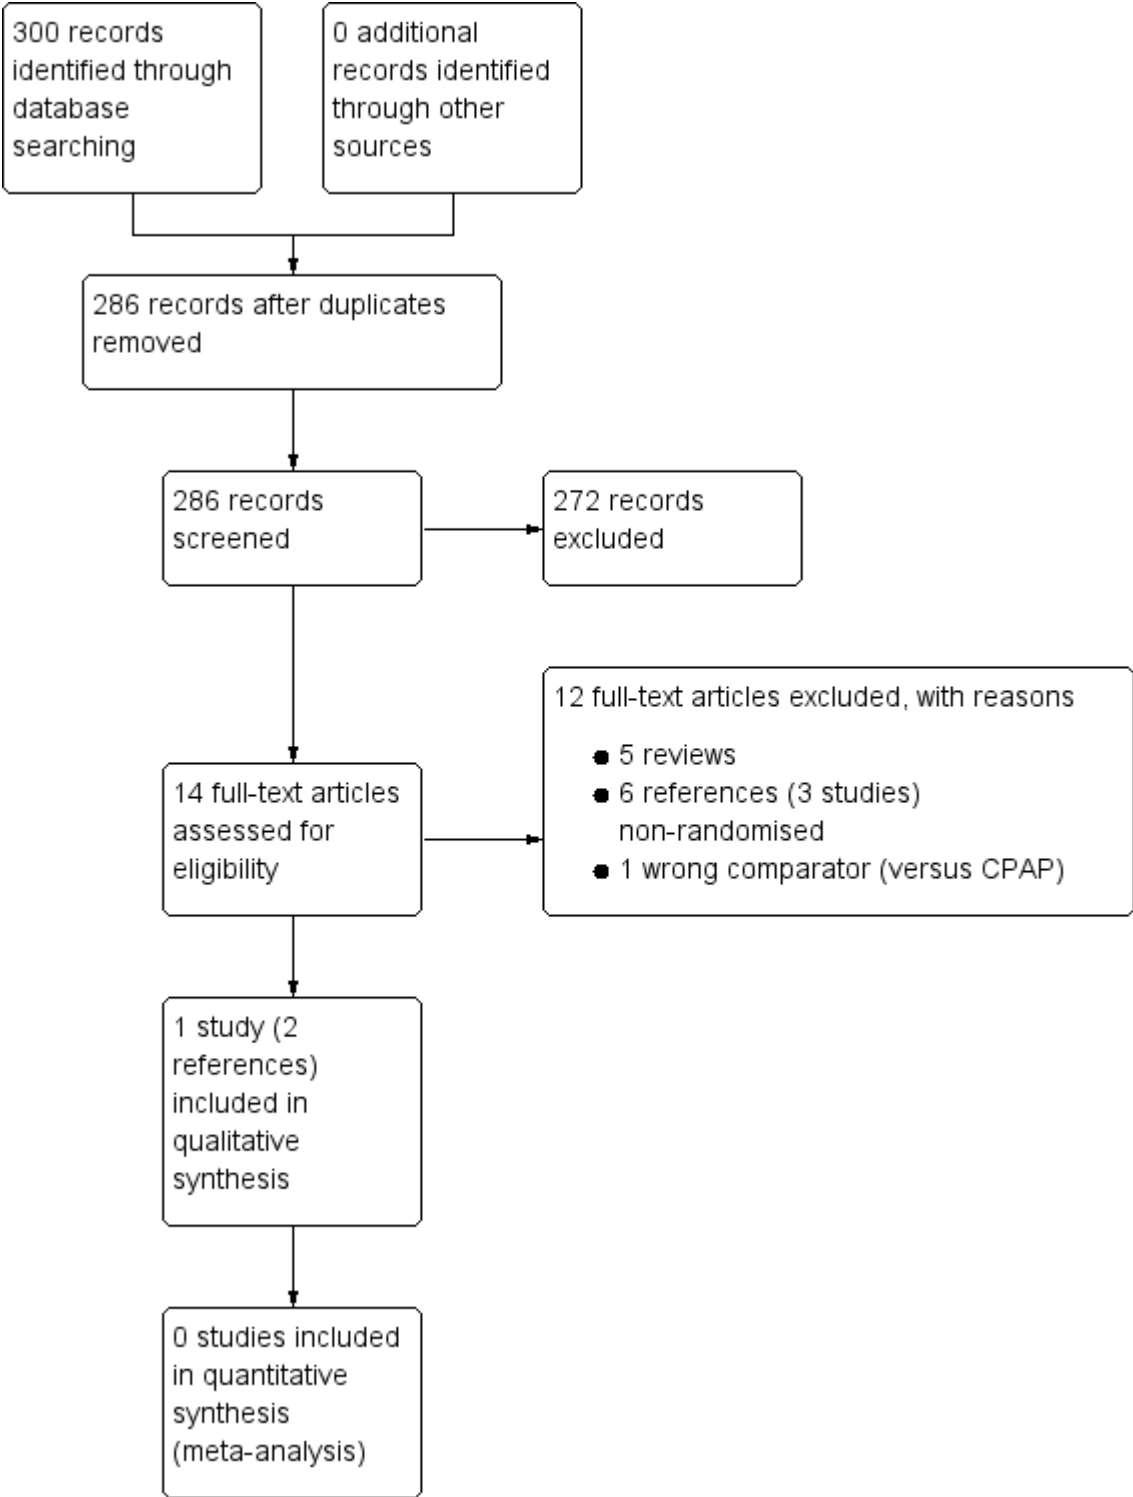

**Figure e2: PICO 2: Should a custom-made dual-block mandibular advancement device or CPAP be used for adult patients with obstructive sleep apnoea?**

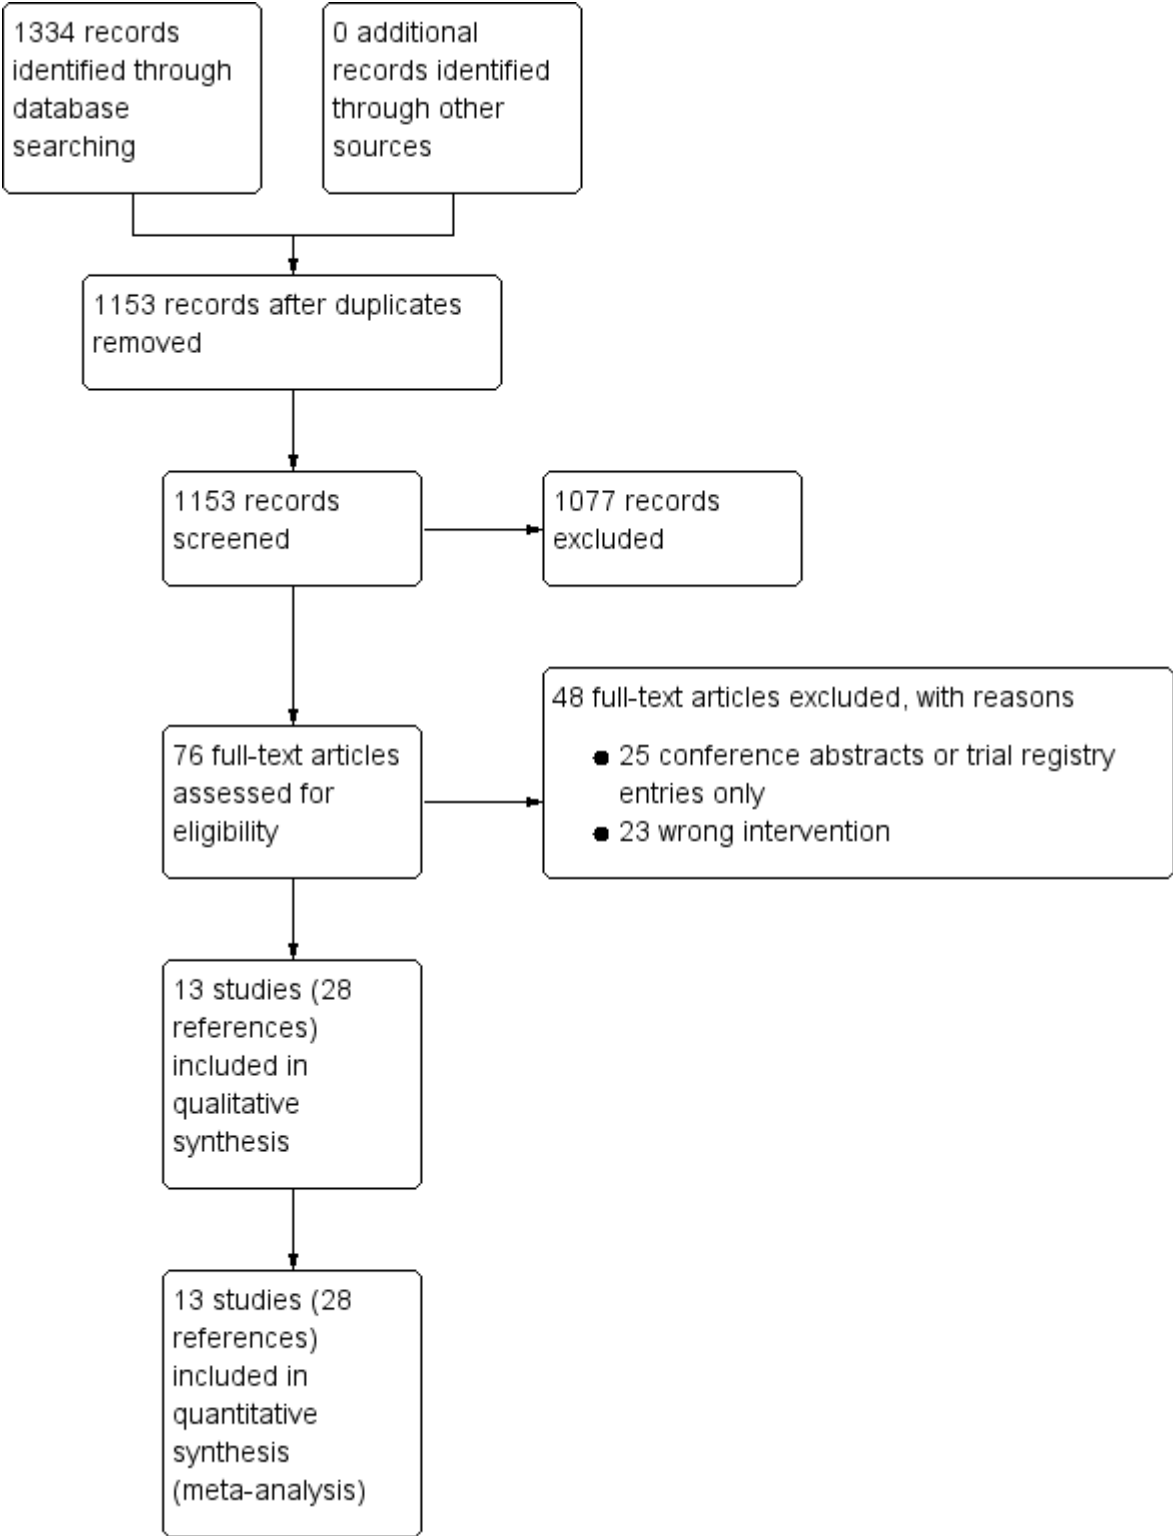

**Figure e3: PICO 3: Should hypoglossal nerve stimulation during sleep or no treatment be used for adult patients with obstructive sleep apnoea?**

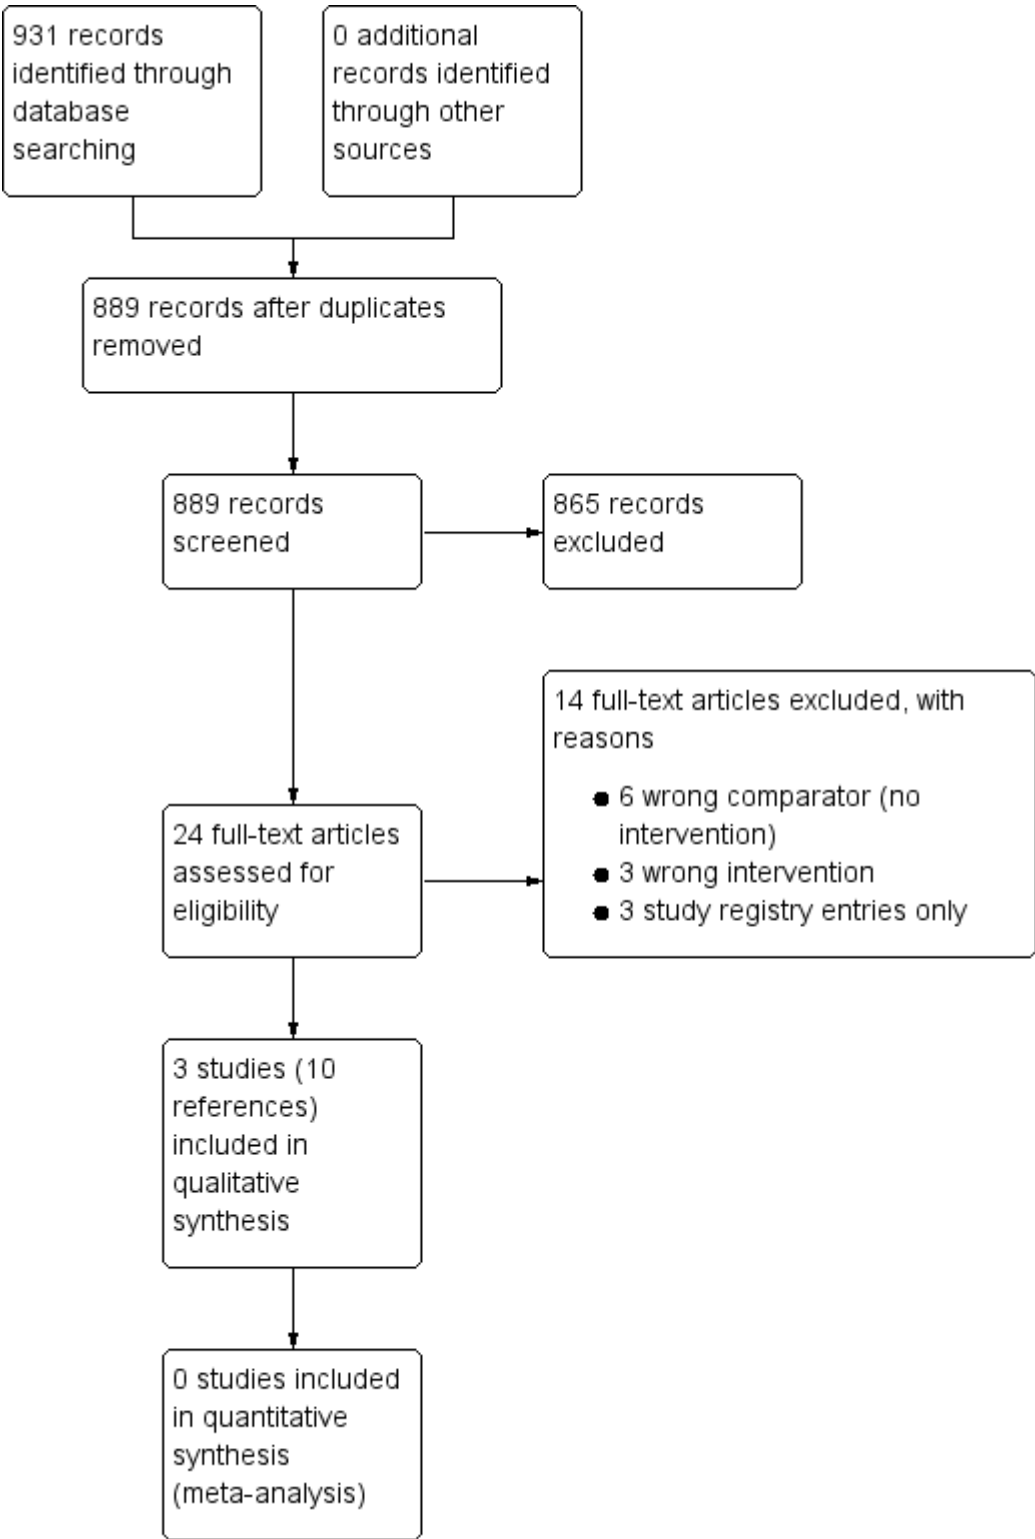



**Figure e4: PICO 4 a: In adult patients with OSA, should myofunctional therapy or no treatment be used?**

**PICO 4 b: Should myofunctional therapy or CPAP be used for adult patients with obstructive sleep apnoea?**

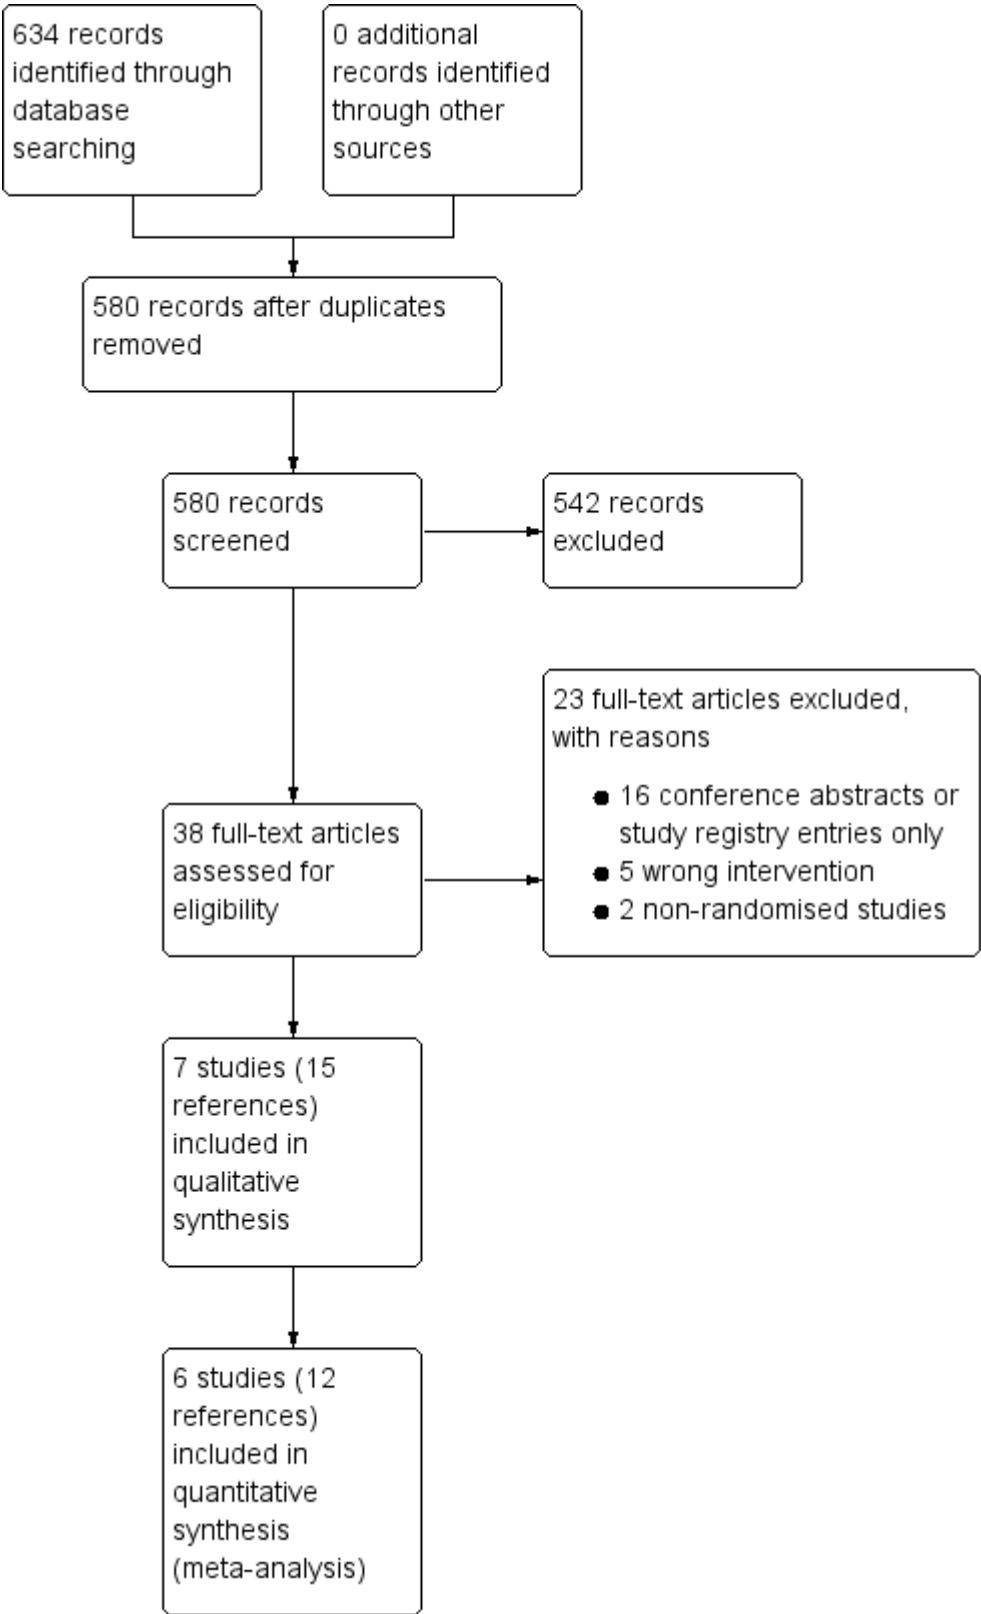

**Figure e5: PICO 5: Should maxillo-mandibular osteotomy or CPAP be used for adult patients with obstructive sleep apnoea?**

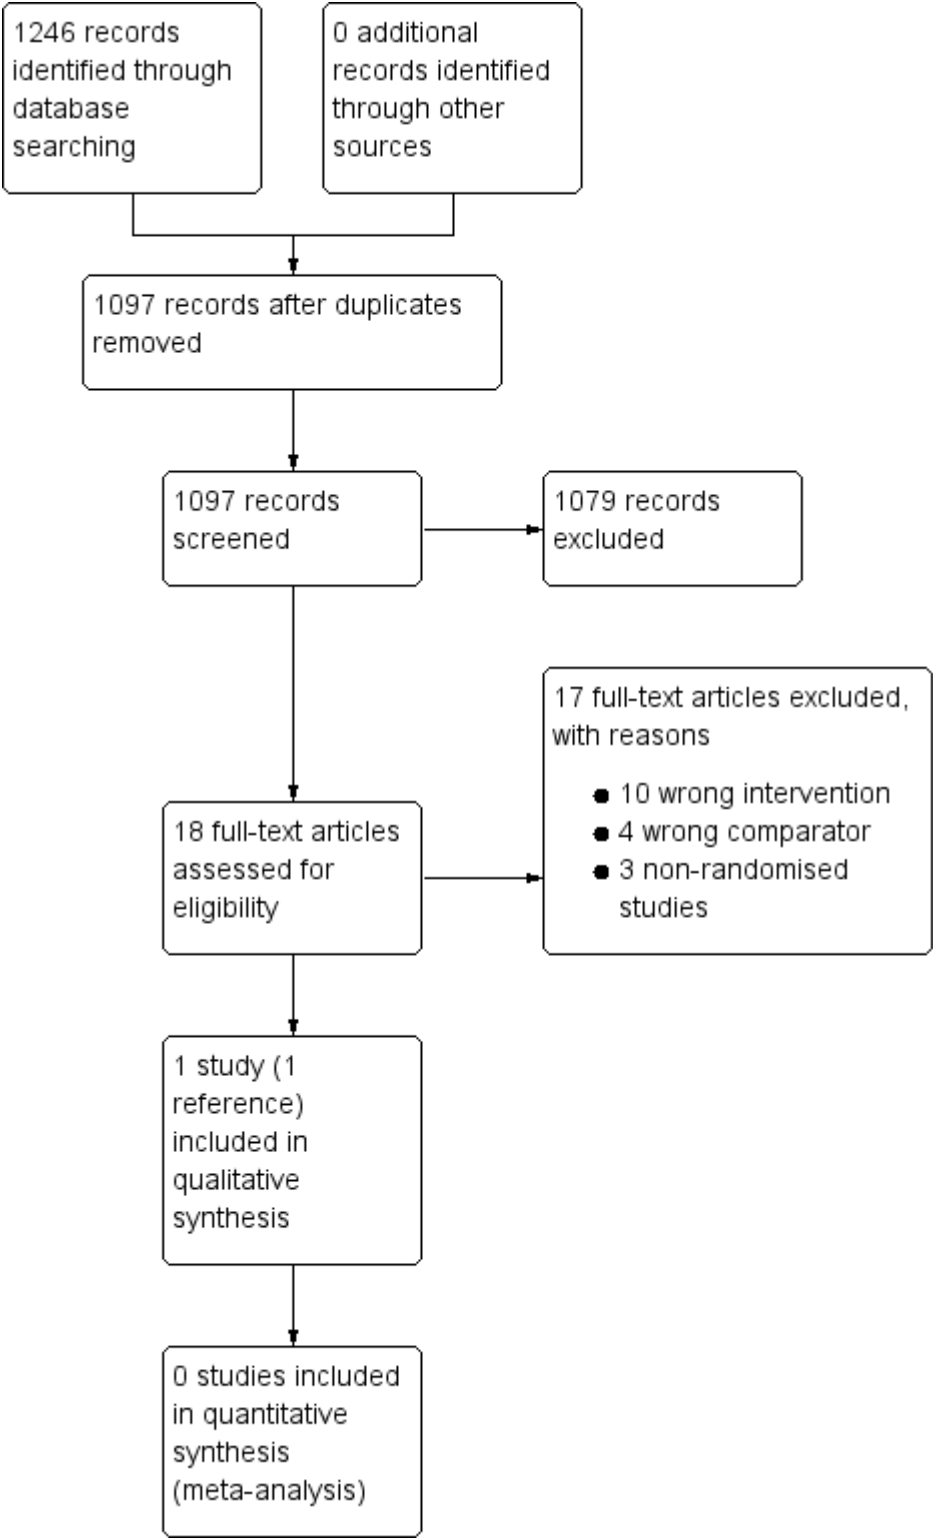

**Figure e6: PICO 6: Should carbonic anhydrase inhibitors (compared to placebo) be used for adult patients with obstructive sleep apnoea?**

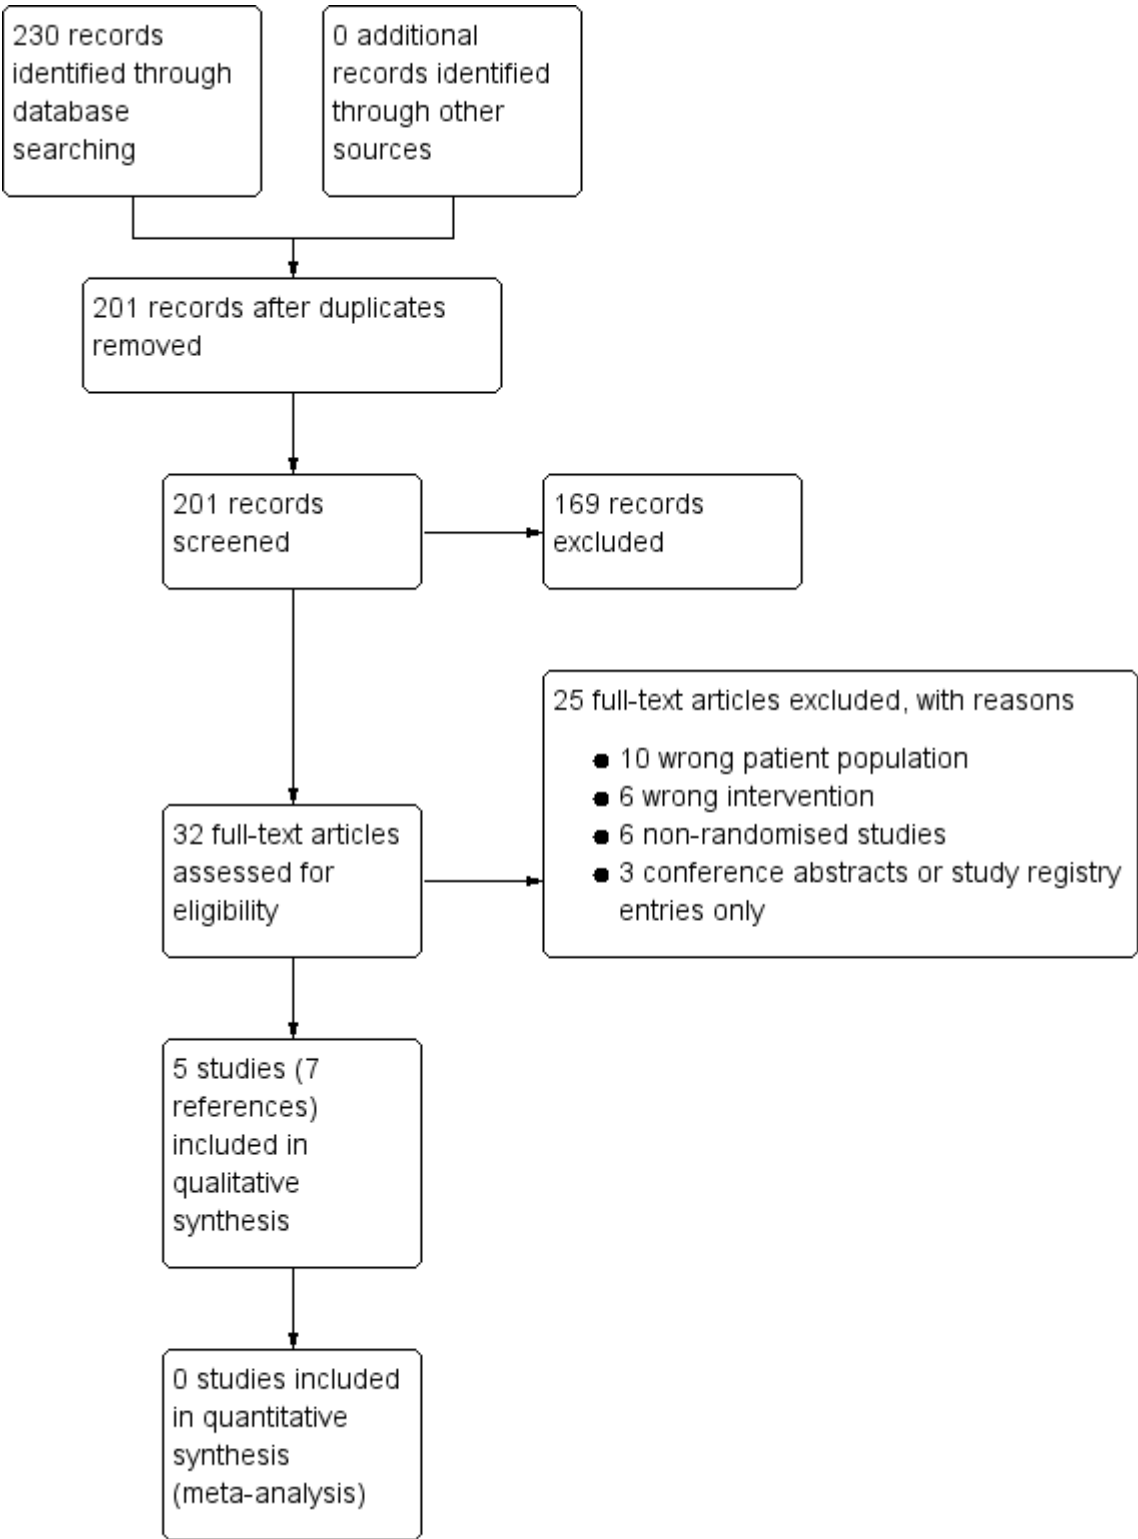

**Figure e7: PICO 7: Should positional therapy or CPAP be used for adult patients with position-dependent obstructive sleep apnoea?**

**PICO 8: Should positional therapy (intervention) or custom made dual-block mandibular advancement devices (control) be used for adult patients with position-dependent obstructive sleep apnoea?**

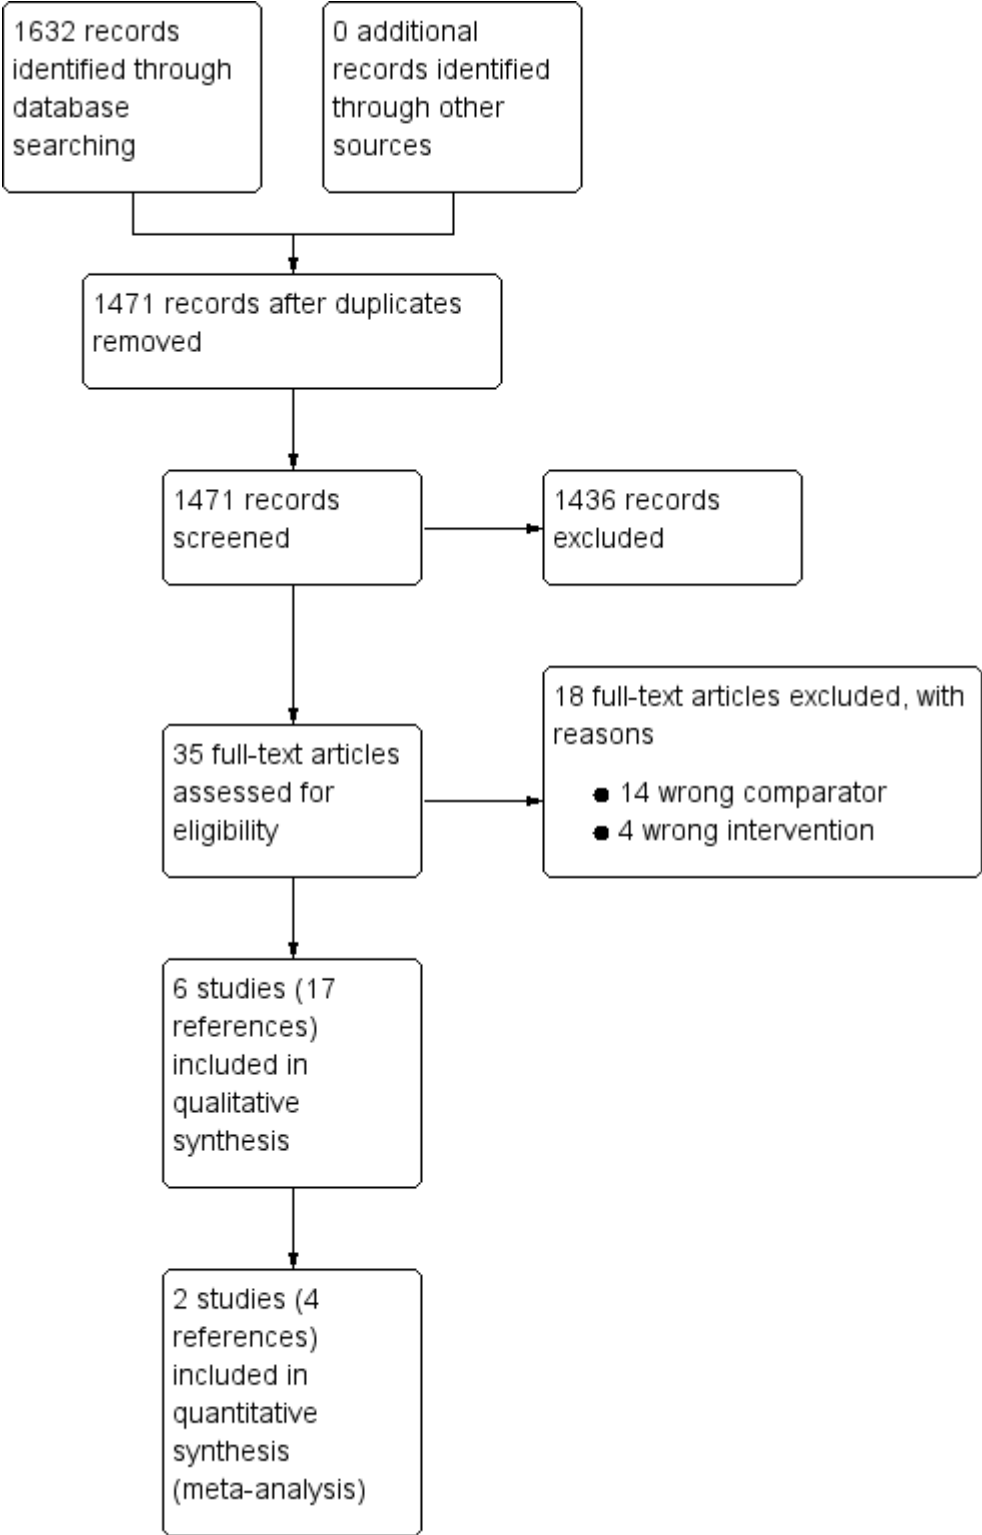

Figure e8: Overview of included RCTs with RoB judgement for each PICO

| PICO 1     | [1, 2]                                                                                                                    | <table border="0" style="width: 100%; text-align: center;"> <tr> <td></td> <td>Random sequence generation (selection bias)</td> <td>Allocation concealment (selection bias)</td> <td>Blinding of patients/ participants (performance bias)</td> <td>Blinding of personnel (performance bias)</td> <td>Blinding of outcome assessment subjective outcome (detection bias)</td> <td>Blinding of outcome assessment objective outcome (detection bias)</td> <td>Incomplete outcome data (attrition bias)</td> <td>Selective reporting (reporting bias)</td> <td>Other bias</td> </tr> <tr> <td>Dixon</td> <td><span style="background-color: green; color: white; border: 1px solid black; border-radius: 50%; padding: 2px;">+</span></td> <td><span style="background-color: yellow; color: black; border: 1px solid black; border-radius: 50%; padding: 2px;">?</span></td> <td><span style="background-color: red; color: white; border: 1px solid black; border-radius: 50%; padding: 2px;">-</span></td> <td><span style="background-color: red; color: white; border: 1px solid black; border-radius: 50%; padding: 2px;">-</span></td> <td><span style="background-color: red; color: white; border: 1px solid black; border-radius: 50%; padding: 2px;">-</span></td> <td><span style="background-color: green; color: white; border: 1px solid black; border-radius: 50%; padding: 2px;">+</span></td> <td><span style="background-color: green; color: white; border: 1px solid black; border-radius: 50%; padding: 2px;">+</span></td> <td><span style="background-color: yellow; color: black; border: 1px solid black; border-radius: 50%; padding: 2px;">?</span></td> <td><span style="background-color: green; color: white; border: 1px solid black; border-radius: 50%; padding: 2px;">+</span></td> </tr> </table>                                                                                                                                                                                                                                                                                                                                                                                                                                                                                                                                                                                                                                                                                                                                                                                                                                                                                                                                                                                                                                                                                                                                                                                                                                                                                                                                                                                                                                                                                                                                                                                                                                                                                                                                                                                                                                                                                                                                                                                                                                                                                                                                                                                                                                                                                                                                                                                                                                                                                                                                                                                                                                                                                                                                                                                                                                                                                                                                                                                                                                                                                                                                                                                                                                                                                                                                                                                                                                                                                                                                                                                                                                                                                                                                                                                                                                                                                                                                                                                                                                                                                                                                                                                                                                                                                                                                                                                                                                                                                                                                                                                                                                                                                                                                                                                                                                                                                                                                                                                                                                                                                                                                                                                                                                                                                                                                                                                                                                                                                                                                                                                                                                                                                                                                                                                                                                                                                                                                                                                                                                                                                                                                                                                                                                                                                                                                                                                                                                                                                                                                                                                                                                                                                                                                                                                                                                                                                                                                                                                                                                                                                                                                                                                                                                                                                                                                                                                                                                                                                                                                                                                                                                                                                                                                                                                                                                                                                                                                                                                                                                                                                                                                                                                                                                                                                                                                                                                                                                                                                                                                                                                                                                                                                                                                                                                                                                                                                                                                                                                                                                                                                                                                                                                                                                                                                                                                                                                                                                                                                                                                                                                                                                                                                                                                                                                                                                                                                                                                                                                                                                                                                                                                                                                                                                                                                                                                                                                                                                                                                                                                                                                                                                                                                                                                                                                                                                                                                                                                                                                                                                                                                                                                                                                                                                                                                                                                                                                                                                                                                                                                                                                                                                                                                                                                                                                                                                                                                                                                                                                                                                                                                                                                                                                                                                                                                                                                                                                                                                                                                                                                                                                                                                                                                                                                                                                                                                                                                                                                                                                                                                                                                                                                                                                                                                                                                                                                                                                                                                                                                                                                                                                                                                                                                                                                                                                                                                                                                                                                                                                                                                                                                                                                                                                                                                                                                                                                                                                                                                                                   |                                                                                                                           | Random sequence generation (selection bias)                                                                               | Allocation concealment (selection bias)                                                                                   | Blinding of patients/ participants (performance bias)                                                                     | Blinding of personnel (performance bias)                                                                                  | Blinding of outcome assessment subjective outcome (detection bias)                                                        | Blinding of outcome assessment objective outcome (detection bias)                                                        | Incomplete outcome data (attrition bias)                                                                                 | Selective reporting (reporting bias)                                                                                     | Other bias                                                                                                               | Dixon  | <span style="background-color: green; color: white; border: 1px solid black; border-radius: 50%; padding: 2px;">+</span> | <span style="background-color: yellow; color: black; border: 1px solid black; border-radius: 50%; padding: 2px;">?</span> | <span style="background-color: red; color: white; border: 1px solid black; border-radius: 50%; padding: 2px;">-</span> | <span style="background-color: red; color: white; border: 1px solid black; border-radius: 50%; padding: 2px;">-</span> | <span style="background-color: red; color: white; border: 1px solid black; border-radius: 50%; padding: 2px;">-</span> | <span style="background-color: green; color: white; border: 1px solid black; border-radius: 50%; padding: 2px;">+</span> | <span style="background-color: green; color: white; border: 1px solid black; border-radius: 50%; padding: 2px;">+</span>  | <span style="background-color: yellow; color: black; border: 1px solid black; border-radius: 50%; padding: 2px;">?</span> | <span style="background-color: green; color: white; border: 1px solid black; border-radius: 50%; padding: 2px;">+</span> |            |                                                                                                                          |                                                                                                                          |                                                                                                                        |                                                                                                                           |                                                                                                                        |                                                                                                                          |                                                                                                                           |                                                                                                                           |                                                                                                                        |          |                                                                                                                          |                                                                                                                          |                                                                                                                        |                                                                                                                           |                                                                                                                        |                                                                                                                          |                                                                                                                           |                                                                                                                        |                                                                                                                          |         |                                                                                                                          |                                                                                                                          |                                                                                                                        |                                                                                                                          |                                                                                                                        |                                                                                                                          |                                                                                                                           |                                                                                                                          |                                                                                                                        |          |                                                                                                                          |                                                                                                                        |                                                                                                                        |                                                                                                                        |                                                                                                                        |                                                                                                                          |                                                                                                                           |                                                                                                                           |                                                                                                                          |           |                                                                                                                          |                                                                                                                          |                                                                                                                        |                                                                                                                        |                                                                                                                        |                                                                                                                          |                                                                                                                          |                                                                                                                           |                                                                                                                        |      |                                                                                                                          |                                                                                                                           |                                                                                                                        |                                                                                                                        |                                                                                                                        |                                                                                                                          |                                                                                                                           |                                                                                                                           |                                                                                                                        |         |                                                                                                                          |                                                                                                                          |                                                                                                                        |                                                                                                                        |                                                                                                                        |                                                                                                                          |                                                                                                                           |                                                                                                                          |                                                                                                                          |          |                                                                                                                          |                                                                                                                           |                                                                                                                        |                                                                                                                        |                                                                                                                        |                                                                                                                          |                                                                                                                          |                                                                                                                        |                                                                                                                        |        |                                                                                                                           |                                                                                                                           |                                                                                                                        |                                                                                                                          |                                                                                                                        |                                                                                                                          |                                                                                                                           |                                                                                                                          |                                                                                                                          |     |                                                                                                                          |                                                                                                                           |                                                                                                                        |                                                                                                                           |                                                                                                                        |                                                                                                                          |                                                                                                                           |                                                                                                                           |                                                                                                                        |          |                                                                                                                          |                                                                                                                           |                                                                                                                        |                                                                                                                        |                                                                                                                        |                                                                                                                          |                                                                                                                           |                                                                                                                          |                                                                                                                        |
|------------|---------------------------------------------------------------------------------------------------------------------------|-------------------------------------------------------------------------------------------------------------------------------------------------------------------------------------------------------------------------------------------------------------------------------------------------------------------------------------------------------------------------------------------------------------------------------------------------------------------------------------------------------------------------------------------------------------------------------------------------------------------------------------------------------------------------------------------------------------------------------------------------------------------------------------------------------------------------------------------------------------------------------------------------------------------------------------------------------------------------------------------------------------------------------------------------------------------------------------------------------------------------------------------------------------------------------------------------------------------------------------------------------------------------------------------------------------------------------------------------------------------------------------------------------------------------------------------------------------------------------------------------------------------------------------------------------------------------------------------------------------------------------------------------------------------------------------------------------------------------------------------------------------------------------------------------------------------------------------------------------------------------------------------------------------------------------------------------------------------------------------------------------------------------------------------------------------------------------------------------------------------------------------------------------------------------------------------------------------------------------------------------------------------------------------------------------------------------------------------------------------------------------------------------------------------------------------------------------------------------------------------------------------------------------------------------------------------------------------------------------------------------------------------------------------------------------------------------------------------------------------------------------------------------------------------------------------------------------------------------------------------------------------------------------------------------------------------------------------------------------------------------------------------------------------------------------------------------------------------------------------------------------------------------------------------------------------------------------------------------------------------------------------------------------------------------------------------------------------------------------------------------------------------------------------------------------------------------------------------------------------------------------------------------------------------------------------------------------------------------------------------------------------------------------------------------------------------------------------------------------------------------------------------------------------------------------------------------------------------------------------------------------------------------------------------------------------------------------------------------------------------------------------------------------------------------------------------------------------------------------------------------------------------------------------------------------------------------------------------------------------------------------------------------------------------------------------------------------------------------------------------------------------------------------------------------------------------------------------------------------------------------------------------------------------------------------------------------------------------------------------------------------------------------------------------------------------------------------------------------------------------------------------------------------------------------------------------------------------------------------------------------------------------------------------------------------------------------------------------------------------------------------------------------------------------------------------------------------------------------------------------------------------------------------------------------------------------------------------------------------------------------------------------------------------------------------------------------------------------------------------------------------------------------------------------------------------------------------------------------------------------------------------------------------------------------------------------------------------------------------------------------------------------------------------------------------------------------------------------------------------------------------------------------------------------------------------------------------------------------------------------------------------------------------------------------------------------------------------------------------------------------------------------------------------------------------------------------------------------------------------------------------------------------------------------------------------------------------------------------------------------------------------------------------------------------------------------------------------------------------------------------------------------------------------------------------------------------------------------------------------------------------------------------------------------------------------------------------------------------------------------------------------------------------------------------------------------------------------------------------------------------------------------------------------------------------------------------------------------------------------------------------------------------------------------------------------------------------------------------------------------------------------------------------------------------------------------------------------------------------------------------------------------------------------------------------------------------------------------------------------------------------------------------------------------------------------------------------------------------------------------------------------------------------------------------------------------------------------------------------------------------------------------------------------------------------------------------------------------------------------------------------------------------------------------------------------------------------------------------------------------------------------------------------------------------------------------------------------------------------------------------------------------------------------------------------------------------------------------------------------------------------------------------------------------------------------------------------------------------------------------------------------------------------------------------------------------------------------------------------------------------------------------------------------------------------------------------------------------------------------------------------------------------------------------------------------------------------------------------------------------------------------------------------------------------------------------------------------------------------------------------------------------------------------------------------------------------------------------------------------------------------------------------------------------------------------------------------------------------------------------------------------------------------------------------------------------------------------------------------------------------------------------------------------------------------------------------------------------------------------------------------------------------------------------------------------------------------------------------------------------------------------------------------------------------------------------------------------------------------------------------------------------------------------------------------------------------------------------------------------------------------------------------------------------------------------------------------------------------------------------------------------------------------------------------------------------------------------------------------------------------------------------------------------------------------------------------------------------------------------------------------------------------------------------------------------------------------------------------------------------------------------------------------------------------------------------------------------------------------------------------------------------------------------------------------------------------------------------------------------------------------------------------------------------------------------------------------------------------------------------------------------------------------------------------------------------------------------------------------------------------------------------------------------------------------------------------------------------------------------------------------------------------------------------------------------------------------------------------------------------------------------------------------------------------------------------------------------------------------------------------------------------------------------------------------------------------------------------------------------------------------------------------------------------------------------------------------------------------------------------------------------------------------------------------------------------------------------------------------------------------------------------------------------------------------------------------------------------------------------------------------------------------------------------------------------------------------------------------------------------------------------------------------------------------------------------------------------------------------------------------------------------------------------------------------------------------------------------------------------------------------------------------------------------------------------------------------------------------------------------------------------------------------------------------------------------------------------------------------------------------------------------------------------------------------------------------------------------------------------------------------------------------------------------------------------------------------------------------------------------------------------------------------------------------------------------------------------------------------------------------------------------------------------------------------------------------------------------------------------------------------------------------------------------------------------------------------------------------------------------------------------------------------------------------------------------------------------------------------------------------------------------------------------------------------------------------------------------------------------------------------------------------------------------------------------------------------------------------------------------------------------------------------------------------------------------------------------------------------------------------------------------------------------------------------------------------------------------------------------------------------------------------------------------------------------------------------------------------------------------------------------------------------------------------------------------------------------------------------------------------------------------------------------------------------------------------------------------------------------------------------------------------------------------------------------------------------------------------------------------------------------------------------------------------------------------------------------------------------------------------------------------------------------------------------------------------------------------------------------------------------------------------------------------------------------------------------------------------------------------------------------------------------------------------------------------------------------------------------------------------------------------------------------------------------------------------------------------------------------------------------------------------------------------------------------------------------------------------------------------------------------------------------------------------------------------------------------------------------------------------------------------------------------------------------------------------------------------------------------------------------------------------------------------------------------------------------------------------------------------------------------------------------------------------------------------------------------------------------------------------------------------------------------------------------------------------------------------------------------------------------------------------------------------------------------------------------------------------------------------------------------------------------------------------------------------------------------------------------------------------------------------------------------------------------------------------------------------------------------------------------------------------------------------------------------------------------------------------------------------------------------------------------------------------------------------------------------------------------------------------------------------------------------------------------------------------------------------------------------------------------------------------------------------------------------------------------------------------------------------------------------------------------------------------------------------------------------------------------------------------------------------------------------------------------------------------------------------------------------------------------------------------------------------------------|---------------------------------------------------------------------------------------------------------------------------|---------------------------------------------------------------------------------------------------------------------------|---------------------------------------------------------------------------------------------------------------------------|---------------------------------------------------------------------------------------------------------------------------|---------------------------------------------------------------------------------------------------------------------------|---------------------------------------------------------------------------------------------------------------------------|--------------------------------------------------------------------------------------------------------------------------|--------------------------------------------------------------------------------------------------------------------------|--------------------------------------------------------------------------------------------------------------------------|--------------------------------------------------------------------------------------------------------------------------|--------|--------------------------------------------------------------------------------------------------------------------------|---------------------------------------------------------------------------------------------------------------------------|------------------------------------------------------------------------------------------------------------------------|------------------------------------------------------------------------------------------------------------------------|------------------------------------------------------------------------------------------------------------------------|--------------------------------------------------------------------------------------------------------------------------|---------------------------------------------------------------------------------------------------------------------------|---------------------------------------------------------------------------------------------------------------------------|--------------------------------------------------------------------------------------------------------------------------|------------|--------------------------------------------------------------------------------------------------------------------------|--------------------------------------------------------------------------------------------------------------------------|------------------------------------------------------------------------------------------------------------------------|---------------------------------------------------------------------------------------------------------------------------|------------------------------------------------------------------------------------------------------------------------|--------------------------------------------------------------------------------------------------------------------------|---------------------------------------------------------------------------------------------------------------------------|---------------------------------------------------------------------------------------------------------------------------|------------------------------------------------------------------------------------------------------------------------|----------|--------------------------------------------------------------------------------------------------------------------------|--------------------------------------------------------------------------------------------------------------------------|------------------------------------------------------------------------------------------------------------------------|---------------------------------------------------------------------------------------------------------------------------|------------------------------------------------------------------------------------------------------------------------|--------------------------------------------------------------------------------------------------------------------------|---------------------------------------------------------------------------------------------------------------------------|------------------------------------------------------------------------------------------------------------------------|--------------------------------------------------------------------------------------------------------------------------|---------|--------------------------------------------------------------------------------------------------------------------------|--------------------------------------------------------------------------------------------------------------------------|------------------------------------------------------------------------------------------------------------------------|--------------------------------------------------------------------------------------------------------------------------|------------------------------------------------------------------------------------------------------------------------|--------------------------------------------------------------------------------------------------------------------------|---------------------------------------------------------------------------------------------------------------------------|--------------------------------------------------------------------------------------------------------------------------|------------------------------------------------------------------------------------------------------------------------|----------|--------------------------------------------------------------------------------------------------------------------------|------------------------------------------------------------------------------------------------------------------------|------------------------------------------------------------------------------------------------------------------------|------------------------------------------------------------------------------------------------------------------------|------------------------------------------------------------------------------------------------------------------------|--------------------------------------------------------------------------------------------------------------------------|---------------------------------------------------------------------------------------------------------------------------|---------------------------------------------------------------------------------------------------------------------------|--------------------------------------------------------------------------------------------------------------------------|-----------|--------------------------------------------------------------------------------------------------------------------------|--------------------------------------------------------------------------------------------------------------------------|------------------------------------------------------------------------------------------------------------------------|------------------------------------------------------------------------------------------------------------------------|------------------------------------------------------------------------------------------------------------------------|--------------------------------------------------------------------------------------------------------------------------|--------------------------------------------------------------------------------------------------------------------------|---------------------------------------------------------------------------------------------------------------------------|------------------------------------------------------------------------------------------------------------------------|------|--------------------------------------------------------------------------------------------------------------------------|---------------------------------------------------------------------------------------------------------------------------|------------------------------------------------------------------------------------------------------------------------|------------------------------------------------------------------------------------------------------------------------|------------------------------------------------------------------------------------------------------------------------|--------------------------------------------------------------------------------------------------------------------------|---------------------------------------------------------------------------------------------------------------------------|---------------------------------------------------------------------------------------------------------------------------|------------------------------------------------------------------------------------------------------------------------|---------|--------------------------------------------------------------------------------------------------------------------------|--------------------------------------------------------------------------------------------------------------------------|------------------------------------------------------------------------------------------------------------------------|------------------------------------------------------------------------------------------------------------------------|------------------------------------------------------------------------------------------------------------------------|--------------------------------------------------------------------------------------------------------------------------|---------------------------------------------------------------------------------------------------------------------------|--------------------------------------------------------------------------------------------------------------------------|--------------------------------------------------------------------------------------------------------------------------|----------|--------------------------------------------------------------------------------------------------------------------------|---------------------------------------------------------------------------------------------------------------------------|------------------------------------------------------------------------------------------------------------------------|------------------------------------------------------------------------------------------------------------------------|------------------------------------------------------------------------------------------------------------------------|--------------------------------------------------------------------------------------------------------------------------|--------------------------------------------------------------------------------------------------------------------------|------------------------------------------------------------------------------------------------------------------------|------------------------------------------------------------------------------------------------------------------------|--------|---------------------------------------------------------------------------------------------------------------------------|---------------------------------------------------------------------------------------------------------------------------|------------------------------------------------------------------------------------------------------------------------|--------------------------------------------------------------------------------------------------------------------------|------------------------------------------------------------------------------------------------------------------------|--------------------------------------------------------------------------------------------------------------------------|---------------------------------------------------------------------------------------------------------------------------|--------------------------------------------------------------------------------------------------------------------------|--------------------------------------------------------------------------------------------------------------------------|-----|--------------------------------------------------------------------------------------------------------------------------|---------------------------------------------------------------------------------------------------------------------------|------------------------------------------------------------------------------------------------------------------------|---------------------------------------------------------------------------------------------------------------------------|------------------------------------------------------------------------------------------------------------------------|--------------------------------------------------------------------------------------------------------------------------|---------------------------------------------------------------------------------------------------------------------------|---------------------------------------------------------------------------------------------------------------------------|------------------------------------------------------------------------------------------------------------------------|----------|--------------------------------------------------------------------------------------------------------------------------|---------------------------------------------------------------------------------------------------------------------------|------------------------------------------------------------------------------------------------------------------------|------------------------------------------------------------------------------------------------------------------------|------------------------------------------------------------------------------------------------------------------------|--------------------------------------------------------------------------------------------------------------------------|---------------------------------------------------------------------------------------------------------------------------|--------------------------------------------------------------------------------------------------------------------------|------------------------------------------------------------------------------------------------------------------------|
|            | Random sequence generation (selection bias)                                                                               | Allocation concealment (selection bias)                                                                                                                                                                                                                                                                                                                                                                                                                                                                                                                                                                                                                                                                                                                                                                                                                                                                                                                                                                                                                                                                                                                                                                                                                                                                                                                                                                                                                                                                                                                                                                                                                                                                                                                                                                                                                                                                                                                                                                                                                                                                                                                                                                                                                                                                                                                                                                                                                                                                                                                                                                                                                                                                                                                                                                                                                                                                                                                                                                                                                                                                                                                                                                                                                                                                                                                                                                                                                                                                                                                                                                                                                                                                                                                                                                                                                                                                                                                                                                                                                                                                                                                                                                                                                                                                                                                                                                                                                                                                                                                                                                                                                                                                                                                                                                                                                                                                                                                                                                                                                                                                                                                                                                                                                                                                                                                                                                                                                                                                                                                                                                                                                                                                                                                                                                                                                                                                                                                                                                                                                                                                                                                                                                                                                                                                                                                                                                                                                                                                                                                                                                                                                                                                                                                                                                                                                                                                                                                                                                                                                                                                                                                                                                                                                                                                                                                                                                                                                                                                                                                                                                                                                                                                                                                                                                                                                                                                                                                                                                                                                                                                                                                                                                                                                                                                                                                                                                                                                                                                                                                                                                                                                                                                                                                                                                                                                                                                                                                                                                                                                                                                                                                                                                                                                                                                                                                                                                                                                                                                                                                                                                                                                                                                                                                                                                                                                                                                                                                                                                                                                                                                                                                                                                                                                                                                                                                                                                                                                                                                                                                                                                                                                                                                                                                                                                                                                                                                                                                                                                                                                                                                                                                                                                                                                                                                                                                                                                                                                                                                                                                                                                                                                                                                                                                                                                                                                                                                                                                                                                                                                                                                                                                                                                                                                                                                                                                                                                                                                                                                                                                                                                                                                                                                                                                                                                                                                                                                                                                                                                                                                                                                                                                                                                                                                                                                                                                                                                                                                                                                                                                                                                                                                                                                                                                                                                                                                                                                                                                                                                                                                                                                                                                                                                                                                                                                                                                                                                                                                                                                                                                                                                                                                                                                                                                                                                                                                                                                                                                                                                                                                                                                                                                                                                                                                                                                                                                                                                                                                                                                                                                                                                                                                                                                                                                                                                                                                                                                                                                                                                                                                                                                                                                                                                                                                                                               | Blinding of patients/ participants (performance bias)                                                                     | Blinding of personnel (performance bias)                                                                                  | Blinding of outcome assessment subjective outcome (detection bias)                                                        | Blinding of outcome assessment objective outcome (detection bias)                                                         | Incomplete outcome data (attrition bias)                                                                                  | Selective reporting (reporting bias)                                                                                      | Other bias                                                                                                               |                                                                                                                          |                                                                                                                          |                                                                                                                          |        |                                                                                                                          |                                                                                                                           |                                                                                                                        |                                                                                                                        |                                                                                                                        |                                                                                                                          |                                                                                                                           |                                                                                                                           |                                                                                                                          |            |                                                                                                                          |                                                                                                                          |                                                                                                                        |                                                                                                                           |                                                                                                                        |                                                                                                                          |                                                                                                                           |                                                                                                                           |                                                                                                                        |          |                                                                                                                          |                                                                                                                          |                                                                                                                        |                                                                                                                           |                                                                                                                        |                                                                                                                          |                                                                                                                           |                                                                                                                        |                                                                                                                          |         |                                                                                                                          |                                                                                                                          |                                                                                                                        |                                                                                                                          |                                                                                                                        |                                                                                                                          |                                                                                                                           |                                                                                                                          |                                                                                                                        |          |                                                                                                                          |                                                                                                                        |                                                                                                                        |                                                                                                                        |                                                                                                                        |                                                                                                                          |                                                                                                                           |                                                                                                                           |                                                                                                                          |           |                                                                                                                          |                                                                                                                          |                                                                                                                        |                                                                                                                        |                                                                                                                        |                                                                                                                          |                                                                                                                          |                                                                                                                           |                                                                                                                        |      |                                                                                                                          |                                                                                                                           |                                                                                                                        |                                                                                                                        |                                                                                                                        |                                                                                                                          |                                                                                                                           |                                                                                                                           |                                                                                                                        |         |                                                                                                                          |                                                                                                                          |                                                                                                                        |                                                                                                                        |                                                                                                                        |                                                                                                                          |                                                                                                                           |                                                                                                                          |                                                                                                                          |          |                                                                                                                          |                                                                                                                           |                                                                                                                        |                                                                                                                        |                                                                                                                        |                                                                                                                          |                                                                                                                          |                                                                                                                        |                                                                                                                        |        |                                                                                                                           |                                                                                                                           |                                                                                                                        |                                                                                                                          |                                                                                                                        |                                                                                                                          |                                                                                                                           |                                                                                                                          |                                                                                                                          |     |                                                                                                                          |                                                                                                                           |                                                                                                                        |                                                                                                                           |                                                                                                                        |                                                                                                                          |                                                                                                                           |                                                                                                                           |                                                                                                                        |          |                                                                                                                          |                                                                                                                           |                                                                                                                        |                                                                                                                        |                                                                                                                        |                                                                                                                          |                                                                                                                           |                                                                                                                          |                                                                                                                        |
| Dixon      | <span style="background-color: green; color: white; border: 1px solid black; border-radius: 50%; padding: 2px;">+</span>  | <span style="background-color: yellow; color: black; border: 1px solid black; border-radius: 50%; padding: 2px;">?</span>                                                                                                                                                                                                                                                                                                                                                                                                                                                                                                                                                                                                                                                                                                                                                                                                                                                                                                                                                                                                                                                                                                                                                                                                                                                                                                                                                                                                                                                                                                                                                                                                                                                                                                                                                                                                                                                                                                                                                                                                                                                                                                                                                                                                                                                                                                                                                                                                                                                                                                                                                                                                                                                                                                                                                                                                                                                                                                                                                                                                                                                                                                                                                                                                                                                                                                                                                                                                                                                                                                                                                                                                                                                                                                                                                                                                                                                                                                                                                                                                                                                                                                                                                                                                                                                                                                                                                                                                                                                                                                                                                                                                                                                                                                                                                                                                                                                                                                                                                                                                                                                                                                                                                                                                                                                                                                                                                                                                                                                                                                                                                                                                                                                                                                                                                                                                                                                                                                                                                                                                                                                                                                                                                                                                                                                                                                                                                                                                                                                                                                                                                                                                                                                                                                                                                                                                                                                                                                                                                                                                                                                                                                                                                                                                                                                                                                                                                                                                                                                                                                                                                                                                                                                                                                                                                                                                                                                                                                                                                                                                                                                                                                                                                                                                                                                                                                                                                                                                                                                                                                                                                                                                                                                                                                                                                                                                                                                                                                                                                                                                                                                                                                                                                                                                                                                                                                                                                                                                                                                                                                                                                                                                                                                                                                                                                                                                                                                                                                                                                                                                                                                                                                                                                                                                                                                                                                                                                                                                                                                                                                                                                                                                                                                                                                                                                                                                                                                                                                                                                                                                                                                                                                                                                                                                                                                                                                                                                                                                                                                                                                                                                                                                                                                                                                                                                                                                                                                                                                                                                                                                                                                                                                                                                                                                                                                                                                                                                                                                                                                                                                                                                                                                                                                                                                                                                                                                                                                                                                                                                                                                                                                                                                                                                                                                                                                                                                                                                                                                                                                                                                                                                                                                                                                                                                                                                                                                                                                                                                                                                                                                                                                                                                                                                                                                                                                                                                                                                                                                                                                                                                                                                                                                                                                                                                                                                                                                                                                                                                                                                                                                                                                                                                                                                                                                                                                                                                                                                                                                                                                                                                                                                                                                                                                                                                                                                                                                                                                                                                                                                                                                                                                                                                                                                                             | <span style="background-color: red; color: white; border: 1px solid black; border-radius: 50%; padding: 2px;">-</span>    | <span style="background-color: red; color: white; border: 1px solid black; border-radius: 50%; padding: 2px;">-</span>    | <span style="background-color: red; color: white; border: 1px solid black; border-radius: 50%; padding: 2px;">-</span>    | <span style="background-color: green; color: white; border: 1px solid black; border-radius: 50%; padding: 2px;">+</span>  | <span style="background-color: green; color: white; border: 1px solid black; border-radius: 50%; padding: 2px;">+</span>  | <span style="background-color: yellow; color: black; border: 1px solid black; border-radius: 50%; padding: 2px;">?</span> | <span style="background-color: green; color: white; border: 1px solid black; border-radius: 50%; padding: 2px;">+</span> |                                                                                                                          |                                                                                                                          |                                                                                                                          |        |                                                                                                                          |                                                                                                                           |                                                                                                                        |                                                                                                                        |                                                                                                                        |                                                                                                                          |                                                                                                                           |                                                                                                                           |                                                                                                                          |            |                                                                                                                          |                                                                                                                          |                                                                                                                        |                                                                                                                           |                                                                                                                        |                                                                                                                          |                                                                                                                           |                                                                                                                           |                                                                                                                        |          |                                                                                                                          |                                                                                                                          |                                                                                                                        |                                                                                                                           |                                                                                                                        |                                                                                                                          |                                                                                                                           |                                                                                                                        |                                                                                                                          |         |                                                                                                                          |                                                                                                                          |                                                                                                                        |                                                                                                                          |                                                                                                                        |                                                                                                                          |                                                                                                                           |                                                                                                                          |                                                                                                                        |          |                                                                                                                          |                                                                                                                        |                                                                                                                        |                                                                                                                        |                                                                                                                        |                                                                                                                          |                                                                                                                           |                                                                                                                           |                                                                                                                          |           |                                                                                                                          |                                                                                                                          |                                                                                                                        |                                                                                                                        |                                                                                                                        |                                                                                                                          |                                                                                                                          |                                                                                                                           |                                                                                                                        |      |                                                                                                                          |                                                                                                                           |                                                                                                                        |                                                                                                                        |                                                                                                                        |                                                                                                                          |                                                                                                                           |                                                                                                                           |                                                                                                                        |         |                                                                                                                          |                                                                                                                          |                                                                                                                        |                                                                                                                        |                                                                                                                        |                                                                                                                          |                                                                                                                           |                                                                                                                          |                                                                                                                          |          |                                                                                                                          |                                                                                                                           |                                                                                                                        |                                                                                                                        |                                                                                                                        |                                                                                                                          |                                                                                                                          |                                                                                                                        |                                                                                                                        |        |                                                                                                                           |                                                                                                                           |                                                                                                                        |                                                                                                                          |                                                                                                                        |                                                                                                                          |                                                                                                                           |                                                                                                                          |                                                                                                                          |     |                                                                                                                          |                                                                                                                           |                                                                                                                        |                                                                                                                           |                                                                                                                        |                                                                                                                          |                                                                                                                           |                                                                                                                           |                                                                                                                        |          |                                                                                                                          |                                                                                                                           |                                                                                                                        |                                                                                                                        |                                                                                                                        |                                                                                                                          |                                                                                                                           |                                                                                                                          |                                                                                                                        |
| PICO 2     | [3-23]                                                                                                                    | <table border="0" style="width: 100%; text-align: center;"> <tr> <td>Aarab</td> <td><span style="background-color: green; color: white; border: 1px solid black; border-radius: 50%; padding: 2px;">+</span></td> <td><span style="background-color: green; color: white; border: 1px solid black; border-radius: 50%; padding: 2px;">+</span></td> <td><span style="background-color: yellow; color: black; border: 1px solid black; border-radius: 50%; padding: 2px;">?</span></td> <td><span style="background-color: green; color: white; border: 1px solid black; border-radius: 50%; padding: 2px;">+</span></td> <td><span style="background-color: yellow; color: black; border: 1px solid black; border-radius: 50%; padding: 2px;">?</span></td> <td><span style="background-color: green; color: white; border: 1px solid black; border-radius: 50%; padding: 2px;">+</span></td> <td><span style="background-color: green; color: white; border: 1px solid black; border-radius: 50%; padding: 2px;">+</span></td> <td><span style="background-color: green; color: white; border: 1px solid black; border-radius: 50%; padding: 2px;">+</span></td> <td><span style="background-color: green; color: white; border: 1px solid black; border-radius: 50%; padding: 2px;">+</span></td> </tr> <tr> <td>Barnes</td> <td><span style="background-color: green; color: white; border: 1px solid black; border-radius: 50%; padding: 2px;">+</span></td> <td><span style="background-color: green; color: white; border: 1px solid black; border-radius: 50%; padding: 2px;">+</span></td> <td><span style="background-color: red; color: white; border: 1px solid black; border-radius: 50%; padding: 2px;">-</span></td> <td><span style="background-color: red; color: white; border: 1px solid black; border-radius: 50%; padding: 2px;">-</span></td> <td><span style="background-color: red; color: white; border: 1px solid black; border-radius: 50%; padding: 2px;">-</span></td> <td><span style="background-color: green; color: white; border: 1px solid black; border-radius: 50%; padding: 2px;">+</span></td> <td><span style="background-color: yellow; color: black; border: 1px solid black; border-radius: 50%; padding: 2px;">?</span></td> <td><span style="background-color: yellow; color: black; border: 1px solid black; border-radius: 50%; padding: 2px;">?</span></td> <td><span style="background-color: red; color: white; border: 1px solid black; border-radius: 50%; padding: 2px;">-</span></td> </tr> <tr> <td>Dal-Fabbro</td> <td><span style="background-color: green; color: white; border: 1px solid black; border-radius: 50%; padding: 2px;">+</span></td> <td><span style="background-color: green; color: white; border: 1px solid black; border-radius: 50%; padding: 2px;">+</span></td> <td><span style="background-color: red; color: white; border: 1px solid black; border-radius: 50%; padding: 2px;">-</span></td> <td><span style="background-color: yellow; color: black; border: 1px solid black; border-radius: 50%; padding: 2px;">?</span></td> <td><span style="background-color: red; color: white; border: 1px solid black; border-radius: 50%; padding: 2px;">-</span></td> <td><span style="background-color: green; color: white; border: 1px solid black; border-radius: 50%; padding: 2px;">+</span></td> <td><span style="background-color: yellow; color: black; border: 1px solid black; border-radius: 50%; padding: 2px;">?</span></td> <td><span style="background-color: yellow; color: black; border: 1px solid black; border-radius: 50%; padding: 2px;">?</span></td> <td><span style="background-color: red; color: white; border: 1px solid black; border-radius: 50%; padding: 2px;">-</span></td> </tr> <tr> <td>De Vries</td> <td><span style="background-color: green; color: white; border: 1px solid black; border-radius: 50%; padding: 2px;">+</span></td> <td><span style="background-color: green; color: white; border: 1px solid black; border-radius: 50%; padding: 2px;">+</span></td> <td><span style="background-color: red; color: white; border: 1px solid black; border-radius: 50%; padding: 2px;">-</span></td> <td><span style="background-color: yellow; color: black; border: 1px solid black; border-radius: 50%; padding: 2px;">?</span></td> <td><span style="background-color: red; color: white; border: 1px solid black; border-radius: 50%; padding: 2px;">-</span></td> <td><span style="background-color: green; color: white; border: 1px solid black; border-radius: 50%; padding: 2px;">+</span></td> <td><span style="background-color: yellow; color: black; border: 1px solid black; border-radius: 50%; padding: 2px;">?</span></td> <td><span style="background-color: red; color: white; border: 1px solid black; border-radius: 50%; padding: 2px;">-</span></td> <td><span style="background-color: green; color: white; border: 1px solid black; border-radius: 50%; padding: 2px;">+</span></td> </tr> <tr> <td>El-Solh</td> <td><span style="background-color: green; color: white; border: 1px solid black; border-radius: 50%; padding: 2px;">+</span></td> <td><span style="background-color: green; color: white; border: 1px solid black; border-radius: 50%; padding: 2px;">+</span></td> <td><span style="background-color: red; color: white; border: 1px solid black; border-radius: 50%; padding: 2px;">-</span></td> <td><span style="background-color: green; color: white; border: 1px solid black; border-radius: 50%; padding: 2px;">+</span></td> <td><span style="background-color: red; color: white; border: 1px solid black; border-radius: 50%; padding: 2px;">-</span></td> <td><span style="background-color: green; color: white; border: 1px solid black; border-radius: 50%; padding: 2px;">+</span></td> <td><span style="background-color: yellow; color: black; border: 1px solid black; border-radius: 50%; padding: 2px;">?</span></td> <td><span style="background-color: green; color: white; border: 1px solid black; border-radius: 50%; padding: 2px;">+</span></td> <td><span style="background-color: red; color: white; border: 1px solid black; border-radius: 50%; padding: 2px;">-</span></td> </tr> <tr> <td>Ferguson</td> <td><span style="background-color: green; color: white; border: 1px solid black; border-radius: 50%; padding: 2px;">+</span></td> <td><span style="background-color: red; color: white; border: 1px solid black; border-radius: 50%; padding: 2px;">-</span></td> <td><span style="background-color: red; color: white; border: 1px solid black; border-radius: 50%; padding: 2px;">-</span></td> <td><span style="background-color: red; color: white; border: 1px solid black; border-radius: 50%; padding: 2px;">-</span></td> <td><span style="background-color: red; color: white; border: 1px solid black; border-radius: 50%; padding: 2px;">-</span></td> <td><span style="background-color: green; color: white; border: 1px solid black; border-radius: 50%; padding: 2px;">+</span></td> <td><span style="background-color: yellow; color: black; border: 1px solid black; border-radius: 50%; padding: 2px;">?</span></td> <td><span style="background-color: yellow; color: black; border: 1px solid black; border-radius: 50%; padding: 2px;">?</span></td> <td><span style="background-color: green; color: white; border: 1px solid black; border-radius: 50%; padding: 2px;">+</span></td> </tr> <tr> <td>Gagnadoux</td> <td><span style="background-color: green; color: white; border: 1px solid black; border-radius: 50%; padding: 2px;">+</span></td> <td><span style="background-color: green; color: white; border: 1px solid black; border-radius: 50%; padding: 2px;">+</span></td> <td><span style="background-color: red; color: white; border: 1px solid black; border-radius: 50%; padding: 2px;">-</span></td> <td><span style="background-color: red; color: white; border: 1px solid black; border-radius: 50%; padding: 2px;">-</span></td> <td><span style="background-color: red; color: white; border: 1px solid black; border-radius: 50%; padding: 2px;">-</span></td> <td><span style="background-color: green; color: white; border: 1px solid black; border-radius: 50%; padding: 2px;">+</span></td> <td><span style="background-color: green; color: white; border: 1px solid black; border-radius: 50%; padding: 2px;">+</span></td> <td><span style="background-color: yellow; color: black; border: 1px solid black; border-radius: 50%; padding: 2px;">?</span></td> <td><span style="background-color: red; color: white; border: 1px solid black; border-radius: 50%; padding: 2px;">-</span></td> </tr> <tr> <td>Glos</td> <td><span style="background-color: green; color: white; border: 1px solid black; border-radius: 50%; padding: 2px;">+</span></td> <td><span style="background-color: yellow; color: black; border: 1px solid black; border-radius: 50%; padding: 2px;">?</span></td> <td><span style="background-color: red; color: white; border: 1px solid black; border-radius: 50%; padding: 2px;">-</span></td> <td><span style="background-color: red; color: white; border: 1px solid black; border-radius: 50%; padding: 2px;">-</span></td> <td><span style="background-color: red; color: white; border: 1px solid black; border-radius: 50%; padding: 2px;">-</span></td> <td><span style="background-color: green; color: white; border: 1px solid black; border-radius: 50%; padding: 2px;">+</span></td> <td><span style="background-color: yellow; color: black; border: 1px solid black; border-radius: 50%; padding: 2px;">?</span></td> <td><span style="background-color: yellow; color: black; border: 1px solid black; border-radius: 50%; padding: 2px;">?</span></td> <td><span style="background-color: red; color: white; border: 1px solid black; border-radius: 50%; padding: 2px;">-</span></td> </tr> <tr> <td>Hoekema</td> <td><span style="background-color: green; color: white; border: 1px solid black; border-radius: 50%; padding: 2px;">+</span></td> <td><span style="background-color: green; color: white; border: 1px solid black; border-radius: 50%; padding: 2px;">+</span></td> <td><span style="background-color: red; color: white; border: 1px solid black; border-radius: 50%; padding: 2px;">-</span></td> <td><span style="background-color: red; color: white; border: 1px solid black; border-radius: 50%; padding: 2px;">-</span></td> <td><span style="background-color: red; color: white; border: 1px solid black; border-radius: 50%; padding: 2px;">-</span></td> <td><span style="background-color: green; color: white; border: 1px solid black; border-radius: 50%; padding: 2px;">+</span></td> <td><span style="background-color: yellow; color: black; border: 1px solid black; border-radius: 50%; padding: 2px;">?</span></td> <td><span style="background-color: green; color: white; border: 1px solid black; border-radius: 50%; padding: 2px;">+</span></td> <td><span style="background-color: green; color: white; border: 1px solid black; border-radius: 50%; padding: 2px;">+</span></td> </tr> <tr> <td>Phillips</td> <td><span style="background-color: green; color: white; border: 1px solid black; border-radius: 50%; padding: 2px;">+</span></td> <td><span style="background-color: yellow; color: black; border: 1px solid black; border-radius: 50%; padding: 2px;">?</span></td> <td><span style="background-color: red; color: white; border: 1px solid black; border-radius: 50%; padding: 2px;">-</span></td> <td><span style="background-color: red; color: white; border: 1px solid black; border-radius: 50%; padding: 2px;">-</span></td> <td><span style="background-color: red; color: white; border: 1px solid black; border-radius: 50%; padding: 2px;">-</span></td> <td><span style="background-color: green; color: white; border: 1px solid black; border-radius: 50%; padding: 2px;">+</span></td> <td><span style="background-color: green; color: white; border: 1px solid black; border-radius: 50%; padding: 2px;">+</span></td> <td><span style="background-color: red; color: white; border: 1px solid black; border-radius: 50%; padding: 2px;">-</span></td> <td><span style="background-color: red; color: white; border: 1px solid black; border-radius: 50%; padding: 2px;">-</span></td> </tr> <tr> <td>Schutz</td> <td><span style="background-color: yellow; color: black; border: 1px solid black; border-radius: 50%; padding: 2px;">?</span></td> <td><span style="background-color: yellow; color: black; border: 1px solid black; border-radius: 50%; padding: 2px;">?</span></td> <td><span style="background-color: red; color: white; border: 1px solid black; border-radius: 50%; padding: 2px;">-</span></td> <td><span style="background-color: green; color: white; border: 1px solid black; border-radius: 50%; padding: 2px;">+</span></td> <td><span style="background-color: red; color: white; border: 1px solid black; border-radius: 50%; padding: 2px;">-</span></td> <td><span style="background-color: green; color: white; border: 1px solid black; border-radius: 50%; padding: 2px;">+</span></td> <td><span style="background-color: yellow; color: black; border: 1px solid black; border-radius: 50%; padding: 2px;">?</span></td> <td><span style="background-color: green; color: white; border: 1px solid black; border-radius: 50%; padding: 2px;">+</span></td> <td><span style="background-color: green; color: white; border: 1px solid black; border-radius: 50%; padding: 2px;">+</span></td> </tr> <tr> <td>Tan</td> <td><span style="background-color: green; color: white; border: 1px solid black; border-radius: 50%; padding: 2px;">+</span></td> <td><span style="background-color: yellow; color: black; border: 1px solid black; border-radius: 50%; padding: 2px;">?</span></td> <td><span style="background-color: red; color: white; border: 1px solid black; border-radius: 50%; padding: 2px;">-</span></td> <td><span style="background-color: yellow; color: black; border: 1px solid black; border-radius: 50%; padding: 2px;">?</span></td> <td><span style="background-color: red; color: white; border: 1px solid black; border-radius: 50%; padding: 2px;">-</span></td> <td><span style="background-color: green; color: white; border: 1px solid black; border-radius: 50%; padding: 2px;">+</span></td> <td><span style="background-color: yellow; color: black; border: 1px solid black; border-radius: 50%; padding: 2px;">?</span></td> <td><span style="background-color: yellow; color: black; border: 1px solid black; border-radius: 50%; padding: 2px;">?</span></td> <td><span style="background-color: red; color: white; border: 1px solid black; border-radius: 50%; padding: 2px;">-</span></td> </tr> <tr> <td>Yamamoto</td> <td><span style="background-color: green; color: white; border: 1px solid black; border-radius: 50%; padding: 2px;">+</span></td> <td><span style="background-color: yellow; color: black; border: 1px solid black; border-radius: 50%; padding: 2px;">?</span></td> <td><span style="background-color: red; color: white; border: 1px solid black; border-radius: 50%; padding: 2px;">-</span></td> <td><span style="background-color: red; color: white; border: 1px solid black; border-radius: 50%; padding: 2px;">-</span></td> <td><span style="background-color: red; color: white; border: 1px solid black; border-radius: 50%; padding: 2px;">-</span></td> <td><span style="background-color: green; color: white; border: 1px solid black; border-radius: 50%; padding: 2px;">+</span></td> <td><span style="background-color: yellow; color: black; border: 1px solid black; border-radius: 50%; padding: 2px;">?</span></td> <td><span style="background-color: green; color: white; border: 1px solid black; border-radius: 50%; padding: 2px;">+</span></td> <td><span style="background-color: red; color: white; border: 1px solid black; border-radius: 50%; padding: 2px;">-</span></td> </tr> </table> <p>(Footnote to Aarab: Patients were blinded to the nature of the</p> | Aarab                                                                                                                     | <span style="background-color: green; color: white; border: 1px solid black; border-radius: 50%; padding: 2px;">+</span>  | <span style="background-color: green; color: white; border: 1px solid black; border-radius: 50%; padding: 2px;">+</span>  | <span style="background-color: yellow; color: black; border: 1px solid black; border-radius: 50%; padding: 2px;">?</span> | <span style="background-color: green; color: white; border: 1px solid black; border-radius: 50%; padding: 2px;">+</span>  | <span style="background-color: yellow; color: black; border: 1px solid black; border-radius: 50%; padding: 2px;">?</span> | <span style="background-color: green; color: white; border: 1px solid black; border-radius: 50%; padding: 2px;">+</span> | <span style="background-color: green; color: white; border: 1px solid black; border-radius: 50%; padding: 2px;">+</span> | <span style="background-color: green; color: white; border: 1px solid black; border-radius: 50%; padding: 2px;">+</span> | <span style="background-color: green; color: white; border: 1px solid black; border-radius: 50%; padding: 2px;">+</span> | Barnes | <span style="background-color: green; color: white; border: 1px solid black; border-radius: 50%; padding: 2px;">+</span> | <span style="background-color: green; color: white; border: 1px solid black; border-radius: 50%; padding: 2px;">+</span>  | <span style="background-color: red; color: white; border: 1px solid black; border-radius: 50%; padding: 2px;">-</span> | <span style="background-color: red; color: white; border: 1px solid black; border-radius: 50%; padding: 2px;">-</span> | <span style="background-color: red; color: white; border: 1px solid black; border-radius: 50%; padding: 2px;">-</span> | <span style="background-color: green; color: white; border: 1px solid black; border-radius: 50%; padding: 2px;">+</span> | <span style="background-color: yellow; color: black; border: 1px solid black; border-radius: 50%; padding: 2px;">?</span> | <span style="background-color: yellow; color: black; border: 1px solid black; border-radius: 50%; padding: 2px;">?</span> | <span style="background-color: red; color: white; border: 1px solid black; border-radius: 50%; padding: 2px;">-</span>   | Dal-Fabbro | <span style="background-color: green; color: white; border: 1px solid black; border-radius: 50%; padding: 2px;">+</span> | <span style="background-color: green; color: white; border: 1px solid black; border-radius: 50%; padding: 2px;">+</span> | <span style="background-color: red; color: white; border: 1px solid black; border-radius: 50%; padding: 2px;">-</span> | <span style="background-color: yellow; color: black; border: 1px solid black; border-radius: 50%; padding: 2px;">?</span> | <span style="background-color: red; color: white; border: 1px solid black; border-radius: 50%; padding: 2px;">-</span> | <span style="background-color: green; color: white; border: 1px solid black; border-radius: 50%; padding: 2px;">+</span> | <span style="background-color: yellow; color: black; border: 1px solid black; border-radius: 50%; padding: 2px;">?</span> | <span style="background-color: yellow; color: black; border: 1px solid black; border-radius: 50%; padding: 2px;">?</span> | <span style="background-color: red; color: white; border: 1px solid black; border-radius: 50%; padding: 2px;">-</span> | De Vries | <span style="background-color: green; color: white; border: 1px solid black; border-radius: 50%; padding: 2px;">+</span> | <span style="background-color: green; color: white; border: 1px solid black; border-radius: 50%; padding: 2px;">+</span> | <span style="background-color: red; color: white; border: 1px solid black; border-radius: 50%; padding: 2px;">-</span> | <span style="background-color: yellow; color: black; border: 1px solid black; border-radius: 50%; padding: 2px;">?</span> | <span style="background-color: red; color: white; border: 1px solid black; border-radius: 50%; padding: 2px;">-</span> | <span style="background-color: green; color: white; border: 1px solid black; border-radius: 50%; padding: 2px;">+</span> | <span style="background-color: yellow; color: black; border: 1px solid black; border-radius: 50%; padding: 2px;">?</span> | <span style="background-color: red; color: white; border: 1px solid black; border-radius: 50%; padding: 2px;">-</span> | <span style="background-color: green; color: white; border: 1px solid black; border-radius: 50%; padding: 2px;">+</span> | El-Solh | <span style="background-color: green; color: white; border: 1px solid black; border-radius: 50%; padding: 2px;">+</span> | <span style="background-color: green; color: white; border: 1px solid black; border-radius: 50%; padding: 2px;">+</span> | <span style="background-color: red; color: white; border: 1px solid black; border-radius: 50%; padding: 2px;">-</span> | <span style="background-color: green; color: white; border: 1px solid black; border-radius: 50%; padding: 2px;">+</span> | <span style="background-color: red; color: white; border: 1px solid black; border-radius: 50%; padding: 2px;">-</span> | <span style="background-color: green; color: white; border: 1px solid black; border-radius: 50%; padding: 2px;">+</span> | <span style="background-color: yellow; color: black; border: 1px solid black; border-radius: 50%; padding: 2px;">?</span> | <span style="background-color: green; color: white; border: 1px solid black; border-radius: 50%; padding: 2px;">+</span> | <span style="background-color: red; color: white; border: 1px solid black; border-radius: 50%; padding: 2px;">-</span> | Ferguson | <span style="background-color: green; color: white; border: 1px solid black; border-radius: 50%; padding: 2px;">+</span> | <span style="background-color: red; color: white; border: 1px solid black; border-radius: 50%; padding: 2px;">-</span> | <span style="background-color: red; color: white; border: 1px solid black; border-radius: 50%; padding: 2px;">-</span> | <span style="background-color: red; color: white; border: 1px solid black; border-radius: 50%; padding: 2px;">-</span> | <span style="background-color: red; color: white; border: 1px solid black; border-radius: 50%; padding: 2px;">-</span> | <span style="background-color: green; color: white; border: 1px solid black; border-radius: 50%; padding: 2px;">+</span> | <span style="background-color: yellow; color: black; border: 1px solid black; border-radius: 50%; padding: 2px;">?</span> | <span style="background-color: yellow; color: black; border: 1px solid black; border-radius: 50%; padding: 2px;">?</span> | <span style="background-color: green; color: white; border: 1px solid black; border-radius: 50%; padding: 2px;">+</span> | Gagnadoux | <span style="background-color: green; color: white; border: 1px solid black; border-radius: 50%; padding: 2px;">+</span> | <span style="background-color: green; color: white; border: 1px solid black; border-radius: 50%; padding: 2px;">+</span> | <span style="background-color: red; color: white; border: 1px solid black; border-radius: 50%; padding: 2px;">-</span> | <span style="background-color: red; color: white; border: 1px solid black; border-radius: 50%; padding: 2px;">-</span> | <span style="background-color: red; color: white; border: 1px solid black; border-radius: 50%; padding: 2px;">-</span> | <span style="background-color: green; color: white; border: 1px solid black; border-radius: 50%; padding: 2px;">+</span> | <span style="background-color: green; color: white; border: 1px solid black; border-radius: 50%; padding: 2px;">+</span> | <span style="background-color: yellow; color: black; border: 1px solid black; border-radius: 50%; padding: 2px;">?</span> | <span style="background-color: red; color: white; border: 1px solid black; border-radius: 50%; padding: 2px;">-</span> | Glos | <span style="background-color: green; color: white; border: 1px solid black; border-radius: 50%; padding: 2px;">+</span> | <span style="background-color: yellow; color: black; border: 1px solid black; border-radius: 50%; padding: 2px;">?</span> | <span style="background-color: red; color: white; border: 1px solid black; border-radius: 50%; padding: 2px;">-</span> | <span style="background-color: red; color: white; border: 1px solid black; border-radius: 50%; padding: 2px;">-</span> | <span style="background-color: red; color: white; border: 1px solid black; border-radius: 50%; padding: 2px;">-</span> | <span style="background-color: green; color: white; border: 1px solid black; border-radius: 50%; padding: 2px;">+</span> | <span style="background-color: yellow; color: black; border: 1px solid black; border-radius: 50%; padding: 2px;">?</span> | <span style="background-color: yellow; color: black; border: 1px solid black; border-radius: 50%; padding: 2px;">?</span> | <span style="background-color: red; color: white; border: 1px solid black; border-radius: 50%; padding: 2px;">-</span> | Hoekema | <span style="background-color: green; color: white; border: 1px solid black; border-radius: 50%; padding: 2px;">+</span> | <span style="background-color: green; color: white; border: 1px solid black; border-radius: 50%; padding: 2px;">+</span> | <span style="background-color: red; color: white; border: 1px solid black; border-radius: 50%; padding: 2px;">-</span> | <span style="background-color: red; color: white; border: 1px solid black; border-radius: 50%; padding: 2px;">-</span> | <span style="background-color: red; color: white; border: 1px solid black; border-radius: 50%; padding: 2px;">-</span> | <span style="background-color: green; color: white; border: 1px solid black; border-radius: 50%; padding: 2px;">+</span> | <span style="background-color: yellow; color: black; border: 1px solid black; border-radius: 50%; padding: 2px;">?</span> | <span style="background-color: green; color: white; border: 1px solid black; border-radius: 50%; padding: 2px;">+</span> | <span style="background-color: green; color: white; border: 1px solid black; border-radius: 50%; padding: 2px;">+</span> | Phillips | <span style="background-color: green; color: white; border: 1px solid black; border-radius: 50%; padding: 2px;">+</span> | <span style="background-color: yellow; color: black; border: 1px solid black; border-radius: 50%; padding: 2px;">?</span> | <span style="background-color: red; color: white; border: 1px solid black; border-radius: 50%; padding: 2px;">-</span> | <span style="background-color: red; color: white; border: 1px solid black; border-radius: 50%; padding: 2px;">-</span> | <span style="background-color: red; color: white; border: 1px solid black; border-radius: 50%; padding: 2px;">-</span> | <span style="background-color: green; color: white; border: 1px solid black; border-radius: 50%; padding: 2px;">+</span> | <span style="background-color: green; color: white; border: 1px solid black; border-radius: 50%; padding: 2px;">+</span> | <span style="background-color: red; color: white; border: 1px solid black; border-radius: 50%; padding: 2px;">-</span> | <span style="background-color: red; color: white; border: 1px solid black; border-radius: 50%; padding: 2px;">-</span> | Schutz | <span style="background-color: yellow; color: black; border: 1px solid black; border-radius: 50%; padding: 2px;">?</span> | <span style="background-color: yellow; color: black; border: 1px solid black; border-radius: 50%; padding: 2px;">?</span> | <span style="background-color: red; color: white; border: 1px solid black; border-radius: 50%; padding: 2px;">-</span> | <span style="background-color: green; color: white; border: 1px solid black; border-radius: 50%; padding: 2px;">+</span> | <span style="background-color: red; color: white; border: 1px solid black; border-radius: 50%; padding: 2px;">-</span> | <span style="background-color: green; color: white; border: 1px solid black; border-radius: 50%; padding: 2px;">+</span> | <span style="background-color: yellow; color: black; border: 1px solid black; border-radius: 50%; padding: 2px;">?</span> | <span style="background-color: green; color: white; border: 1px solid black; border-radius: 50%; padding: 2px;">+</span> | <span style="background-color: green; color: white; border: 1px solid black; border-radius: 50%; padding: 2px;">+</span> | Tan | <span style="background-color: green; color: white; border: 1px solid black; border-radius: 50%; padding: 2px;">+</span> | <span style="background-color: yellow; color: black; border: 1px solid black; border-radius: 50%; padding: 2px;">?</span> | <span style="background-color: red; color: white; border: 1px solid black; border-radius: 50%; padding: 2px;">-</span> | <span style="background-color: yellow; color: black; border: 1px solid black; border-radius: 50%; padding: 2px;">?</span> | <span style="background-color: red; color: white; border: 1px solid black; border-radius: 50%; padding: 2px;">-</span> | <span style="background-color: green; color: white; border: 1px solid black; border-radius: 50%; padding: 2px;">+</span> | <span style="background-color: yellow; color: black; border: 1px solid black; border-radius: 50%; padding: 2px;">?</span> | <span style="background-color: yellow; color: black; border: 1px solid black; border-radius: 50%; padding: 2px;">?</span> | <span style="background-color: red; color: white; border: 1px solid black; border-radius: 50%; padding: 2px;">-</span> | Yamamoto | <span style="background-color: green; color: white; border: 1px solid black; border-radius: 50%; padding: 2px;">+</span> | <span style="background-color: yellow; color: black; border: 1px solid black; border-radius: 50%; padding: 2px;">?</span> | <span style="background-color: red; color: white; border: 1px solid black; border-radius: 50%; padding: 2px;">-</span> | <span style="background-color: red; color: white; border: 1px solid black; border-radius: 50%; padding: 2px;">-</span> | <span style="background-color: red; color: white; border: 1px solid black; border-radius: 50%; padding: 2px;">-</span> | <span style="background-color: green; color: white; border: 1px solid black; border-radius: 50%; padding: 2px;">+</span> | <span style="background-color: yellow; color: black; border: 1px solid black; border-radius: 50%; padding: 2px;">?</span> | <span style="background-color: green; color: white; border: 1px solid black; border-radius: 50%; padding: 2px;">+</span> | <span style="background-color: red; color: white; border: 1px solid black; border-radius: 50%; padding: 2px;">-</span> |
| Aarab      | <span style="background-color: green; color: white; border: 1px solid black; border-radius: 50%; padding: 2px;">+</span>  | <span style="background-color: green; color: white; border: 1px solid black; border-radius: 50%; padding: 2px;">+</span>                                                                                                                                                                                                                                                                                                                                                                                                                                                                                                                                                                                                                                                                                                                                                                                                                                                                                                                                                                                                                                                                                                                                                                                                                                                                                                                                                                                                                                                                                                                                                                                                                                                                                                                                                                                                                                                                                                                                                                                                                                                                                                                                                                                                                                                                                                                                                                                                                                                                                                                                                                                                                                                                                                                                                                                                                                                                                                                                                                                                                                                                                                                                                                                                                                                                                                                                                                                                                                                                                                                                                                                                                                                                                                                                                                                                                                                                                                                                                                                                                                                                                                                                                                                                                                                                                                                                                                                                                                                                                                                                                                                                                                                                                                                                                                                                                                                                                                                                                                                                                                                                                                                                                                                                                                                                                                                                                                                                                                                                                                                                                                                                                                                                                                                                                                                                                                                                                                                                                                                                                                                                                                                                                                                                                                                                                                                                                                                                                                                                                                                                                                                                                                                                                                                                                                                                                                                                                                                                                                                                                                                                                                                                                                                                                                                                                                                                                                                                                                                                                                                                                                                                                                                                                                                                                                                                                                                                                                                                                                                                                                                                                                                                                                                                                                                                                                                                                                                                                                                                                                                                                                                                                                                                                                                                                                                                                                                                                                                                                                                                                                                                                                                                                                                                                                                                                                                                                                                                                                                                                                                                                                                                                                                                                                                                                                                                                                                                                                                                                                                                                                                                                                                                                                                                                                                                                                                                                                                                                                                                                                                                                                                                                                                                                                                                                                                                                                                                                                                                                                                                                                                                                                                                                                                                                                                                                                                                                                                                                                                                                                                                                                                                                                                                                                                                                                                                                                                                                                                                                                                                                                                                                                                                                                                                                                                                                                                                                                                                                                                                                                                                                                                                                                                                                                                                                                                                                                                                                                                                                                                                                                                                                                                                                                                                                                                                                                                                                                                                                                                                                                                                                                                                                                                                                                                                                                                                                                                                                                                                                                                                                                                                                                                                                                                                                                                                                                                                                                                                                                                                                                                                                                                                                                                                                                                                                                                                                                                                                                                                                                                                                                                                                                                                                                                                                                                                                                                                                                                                                                                                                                                                                                                                                                                                                                                                                                                                                                                                                                                                                                                                                                                                                                                                                                              | <span style="background-color: yellow; color: black; border: 1px solid black; border-radius: 50%; padding: 2px;">?</span> | <span style="background-color: green; color: white; border: 1px solid black; border-radius: 50%; padding: 2px;">+</span>  | <span style="background-color: yellow; color: black; border: 1px solid black; border-radius: 50%; padding: 2px;">?</span> | <span style="background-color: green; color: white; border: 1px solid black; border-radius: 50%; padding: 2px;">+</span>  | <span style="background-color: green; color: white; border: 1px solid black; border-radius: 50%; padding: 2px;">+</span>  | <span style="background-color: green; color: white; border: 1px solid black; border-radius: 50%; padding: 2px;">+</span>  | <span style="background-color: green; color: white; border: 1px solid black; border-radius: 50%; padding: 2px;">+</span> |                                                                                                                          |                                                                                                                          |                                                                                                                          |        |                                                                                                                          |                                                                                                                           |                                                                                                                        |                                                                                                                        |                                                                                                                        |                                                                                                                          |                                                                                                                           |                                                                                                                           |                                                                                                                          |            |                                                                                                                          |                                                                                                                          |                                                                                                                        |                                                                                                                           |                                                                                                                        |                                                                                                                          |                                                                                                                           |                                                                                                                           |                                                                                                                        |          |                                                                                                                          |                                                                                                                          |                                                                                                                        |                                                                                                                           |                                                                                                                        |                                                                                                                          |                                                                                                                           |                                                                                                                        |                                                                                                                          |         |                                                                                                                          |                                                                                                                          |                                                                                                                        |                                                                                                                          |                                                                                                                        |                                                                                                                          |                                                                                                                           |                                                                                                                          |                                                                                                                        |          |                                                                                                                          |                                                                                                                        |                                                                                                                        |                                                                                                                        |                                                                                                                        |                                                                                                                          |                                                                                                                           |                                                                                                                           |                                                                                                                          |           |                                                                                                                          |                                                                                                                          |                                                                                                                        |                                                                                                                        |                                                                                                                        |                                                                                                                          |                                                                                                                          |                                                                                                                           |                                                                                                                        |      |                                                                                                                          |                                                                                                                           |                                                                                                                        |                                                                                                                        |                                                                                                                        |                                                                                                                          |                                                                                                                           |                                                                                                                           |                                                                                                                        |         |                                                                                                                          |                                                                                                                          |                                                                                                                        |                                                                                                                        |                                                                                                                        |                                                                                                                          |                                                                                                                           |                                                                                                                          |                                                                                                                          |          |                                                                                                                          |                                                                                                                           |                                                                                                                        |                                                                                                                        |                                                                                                                        |                                                                                                                          |                                                                                                                          |                                                                                                                        |                                                                                                                        |        |                                                                                                                           |                                                                                                                           |                                                                                                                        |                                                                                                                          |                                                                                                                        |                                                                                                                          |                                                                                                                           |                                                                                                                          |                                                                                                                          |     |                                                                                                                          |                                                                                                                           |                                                                                                                        |                                                                                                                           |                                                                                                                        |                                                                                                                          |                                                                                                                           |                                                                                                                           |                                                                                                                        |          |                                                                                                                          |                                                                                                                           |                                                                                                                        |                                                                                                                        |                                                                                                                        |                                                                                                                          |                                                                                                                           |                                                                                                                          |                                                                                                                        |
| Barnes     | <span style="background-color: green; color: white; border: 1px solid black; border-radius: 50%; padding: 2px;">+</span>  | <span style="background-color: green; color: white; border: 1px solid black; border-radius: 50%; padding: 2px;">+</span>                                                                                                                                                                                                                                                                                                                                                                                                                                                                                                                                                                                                                                                                                                                                                                                                                                                                                                                                                                                                                                                                                                                                                                                                                                                                                                                                                                                                                                                                                                                                                                                                                                                                                                                                                                                                                                                                                                                                                                                                                                                                                                                                                                                                                                                                                                                                                                                                                                                                                                                                                                                                                                                                                                                                                                                                                                                                                                                                                                                                                                                                                                                                                                                                                                                                                                                                                                                                                                                                                                                                                                                                                                                                                                                                                                                                                                                                                                                                                                                                                                                                                                                                                                                                                                                                                                                                                                                                                                                                                                                                                                                                                                                                                                                                                                                                                                                                                                                                                                                                                                                                                                                                                                                                                                                                                                                                                                                                                                                                                                                                                                                                                                                                                                                                                                                                                                                                                                                                                                                                                                                                                                                                                                                                                                                                                                                                                                                                                                                                                                                                                                                                                                                                                                                                                                                                                                                                                                                                                                                                                                                                                                                                                                                                                                                                                                                                                                                                                                                                                                                                                                                                                                                                                                                                                                                                                                                                                                                                                                                                                                                                                                                                                                                                                                                                                                                                                                                                                                                                                                                                                                                                                                                                                                                                                                                                                                                                                                                                                                                                                                                                                                                                                                                                                                                                                                                                                                                                                                                                                                                                                                                                                                                                                                                                                                                                                                                                                                                                                                                                                                                                                                                                                                                                                                                                                                                                                                                                                                                                                                                                                                                                                                                                                                                                                                                                                                                                                                                                                                                                                                                                                                                                                                                                                                                                                                                                                                                                                                                                                                                                                                                                                                                                                                                                                                                                                                                                                                                                                                                                                                                                                                                                                                                                                                                                                                                                                                                                                                                                                                                                                                                                                                                                                                                                                                                                                                                                                                                                                                                                                                                                                                                                                                                                                                                                                                                                                                                                                                                                                                                                                                                                                                                                                                                                                                                                                                                                                                                                                                                                                                                                                                                                                                                                                                                                                                                                                                                                                                                                                                                                                                                                                                                                                                                                                                                                                                                                                                                                                                                                                                                                                                                                                                                                                                                                                                                                                                                                                                                                                                                                                                                                                                                                                                                                                                                                                                                                                                                                                                                                                                                                                                                                                                              | <span style="background-color: red; color: white; border: 1px solid black; border-radius: 50%; padding: 2px;">-</span>    | <span style="background-color: red; color: white; border: 1px solid black; border-radius: 50%; padding: 2px;">-</span>    | <span style="background-color: red; color: white; border: 1px solid black; border-radius: 50%; padding: 2px;">-</span>    | <span style="background-color: green; color: white; border: 1px solid black; border-radius: 50%; padding: 2px;">+</span>  | <span style="background-color: yellow; color: black; border: 1px solid black; border-radius: 50%; padding: 2px;">?</span> | <span style="background-color: yellow; color: black; border: 1px solid black; border-radius: 50%; padding: 2px;">?</span> | <span style="background-color: red; color: white; border: 1px solid black; border-radius: 50%; padding: 2px;">-</span>   |                                                                                                                          |                                                                                                                          |                                                                                                                          |        |                                                                                                                          |                                                                                                                           |                                                                                                                        |                                                                                                                        |                                                                                                                        |                                                                                                                          |                                                                                                                           |                                                                                                                           |                                                                                                                          |            |                                                                                                                          |                                                                                                                          |                                                                                                                        |                                                                                                                           |                                                                                                                        |                                                                                                                          |                                                                                                                           |                                                                                                                           |                                                                                                                        |          |                                                                                                                          |                                                                                                                          |                                                                                                                        |                                                                                                                           |                                                                                                                        |                                                                                                                          |                                                                                                                           |                                                                                                                        |                                                                                                                          |         |                                                                                                                          |                                                                                                                          |                                                                                                                        |                                                                                                                          |                                                                                                                        |                                                                                                                          |                                                                                                                           |                                                                                                                          |                                                                                                                        |          |                                                                                                                          |                                                                                                                        |                                                                                                                        |                                                                                                                        |                                                                                                                        |                                                                                                                          |                                                                                                                           |                                                                                                                           |                                                                                                                          |           |                                                                                                                          |                                                                                                                          |                                                                                                                        |                                                                                                                        |                                                                                                                        |                                                                                                                          |                                                                                                                          |                                                                                                                           |                                                                                                                        |      |                                                                                                                          |                                                                                                                           |                                                                                                                        |                                                                                                                        |                                                                                                                        |                                                                                                                          |                                                                                                                           |                                                                                                                           |                                                                                                                        |         |                                                                                                                          |                                                                                                                          |                                                                                                                        |                                                                                                                        |                                                                                                                        |                                                                                                                          |                                                                                                                           |                                                                                                                          |                                                                                                                          |          |                                                                                                                          |                                                                                                                           |                                                                                                                        |                                                                                                                        |                                                                                                                        |                                                                                                                          |                                                                                                                          |                                                                                                                        |                                                                                                                        |        |                                                                                                                           |                                                                                                                           |                                                                                                                        |                                                                                                                          |                                                                                                                        |                                                                                                                          |                                                                                                                           |                                                                                                                          |                                                                                                                          |     |                                                                                                                          |                                                                                                                           |                                                                                                                        |                                                                                                                           |                                                                                                                        |                                                                                                                          |                                                                                                                           |                                                                                                                           |                                                                                                                        |          |                                                                                                                          |                                                                                                                           |                                                                                                                        |                                                                                                                        |                                                                                                                        |                                                                                                                          |                                                                                                                           |                                                                                                                          |                                                                                                                        |
| Dal-Fabbro | <span style="background-color: green; color: white; border: 1px solid black; border-radius: 50%; padding: 2px;">+</span>  | <span style="background-color: green; color: white; border: 1px solid black; border-radius: 50%; padding: 2px;">+</span>                                                                                                                                                                                                                                                                                                                                                                                                                                                                                                                                                                                                                                                                                                                                                                                                                                                                                                                                                                                                                                                                                                                                                                                                                                                                                                                                                                                                                                                                                                                                                                                                                                                                                                                                                                                                                                                                                                                                                                                                                                                                                                                                                                                                                                                                                                                                                                                                                                                                                                                                                                                                                                                                                                                                                                                                                                                                                                                                                                                                                                                                                                                                                                                                                                                                                                                                                                                                                                                                                                                                                                                                                                                                                                                                                                                                                                                                                                                                                                                                                                                                                                                                                                                                                                                                                                                                                                                                                                                                                                                                                                                                                                                                                                                                                                                                                                                                                                                                                                                                                                                                                                                                                                                                                                                                                                                                                                                                                                                                                                                                                                                                                                                                                                                                                                                                                                                                                                                                                                                                                                                                                                                                                                                                                                                                                                                                                                                                                                                                                                                                                                                                                                                                                                                                                                                                                                                                                                                                                                                                                                                                                                                                                                                                                                                                                                                                                                                                                                                                                                                                                                                                                                                                                                                                                                                                                                                                                                                                                                                                                                                                                                                                                                                                                                                                                                                                                                                                                                                                                                                                                                                                                                                                                                                                                                                                                                                                                                                                                                                                                                                                                                                                                                                                                                                                                                                                                                                                                                                                                                                                                                                                                                                                                                                                                                                                                                                                                                                                                                                                                                                                                                                                                                                                                                                                                                                                                                                                                                                                                                                                                                                                                                                                                                                                                                                                                                                                                                                                                                                                                                                                                                                                                                                                                                                                                                                                                                                                                                                                                                                                                                                                                                                                                                                                                                                                                                                                                                                                                                                                                                                                                                                                                                                                                                                                                                                                                                                                                                                                                                                                                                                                                                                                                                                                                                                                                                                                                                                                                                                                                                                                                                                                                                                                                                                                                                                                                                                                                                                                                                                                                                                                                                                                                                                                                                                                                                                                                                                                                                                                                                                                                                                                                                                                                                                                                                                                                                                                                                                                                                                                                                                                                                                                                                                                                                                                                                                                                                                                                                                                                                                                                                                                                                                                                                                                                                                                                                                                                                                                                                                                                                                                                                                                                                                                                                                                                                                                                                                                                                                                                                                                                                                                                                              | <span style="background-color: red; color: white; border: 1px solid black; border-radius: 50%; padding: 2px;">-</span>    | <span style="background-color: yellow; color: black; border: 1px solid black; border-radius: 50%; padding: 2px;">?</span> | <span style="background-color: red; color: white; border: 1px solid black; border-radius: 50%; padding: 2px;">-</span>    | <span style="background-color: green; color: white; border: 1px solid black; border-radius: 50%; padding: 2px;">+</span>  | <span style="background-color: yellow; color: black; border: 1px solid black; border-radius: 50%; padding: 2px;">?</span> | <span style="background-color: yellow; color: black; border: 1px solid black; border-radius: 50%; padding: 2px;">?</span> | <span style="background-color: red; color: white; border: 1px solid black; border-radius: 50%; padding: 2px;">-</span>   |                                                                                                                          |                                                                                                                          |                                                                                                                          |        |                                                                                                                          |                                                                                                                           |                                                                                                                        |                                                                                                                        |                                                                                                                        |                                                                                                                          |                                                                                                                           |                                                                                                                           |                                                                                                                          |            |                                                                                                                          |                                                                                                                          |                                                                                                                        |                                                                                                                           |                                                                                                                        |                                                                                                                          |                                                                                                                           |                                                                                                                           |                                                                                                                        |          |                                                                                                                          |                                                                                                                          |                                                                                                                        |                                                                                                                           |                                                                                                                        |                                                                                                                          |                                                                                                                           |                                                                                                                        |                                                                                                                          |         |                                                                                                                          |                                                                                                                          |                                                                                                                        |                                                                                                                          |                                                                                                                        |                                                                                                                          |                                                                                                                           |                                                                                                                          |                                                                                                                        |          |                                                                                                                          |                                                                                                                        |                                                                                                                        |                                                                                                                        |                                                                                                                        |                                                                                                                          |                                                                                                                           |                                                                                                                           |                                                                                                                          |           |                                                                                                                          |                                                                                                                          |                                                                                                                        |                                                                                                                        |                                                                                                                        |                                                                                                                          |                                                                                                                          |                                                                                                                           |                                                                                                                        |      |                                                                                                                          |                                                                                                                           |                                                                                                                        |                                                                                                                        |                                                                                                                        |                                                                                                                          |                                                                                                                           |                                                                                                                           |                                                                                                                        |         |                                                                                                                          |                                                                                                                          |                                                                                                                        |                                                                                                                        |                                                                                                                        |                                                                                                                          |                                                                                                                           |                                                                                                                          |                                                                                                                          |          |                                                                                                                          |                                                                                                                           |                                                                                                                        |                                                                                                                        |                                                                                                                        |                                                                                                                          |                                                                                                                          |                                                                                                                        |                                                                                                                        |        |                                                                                                                           |                                                                                                                           |                                                                                                                        |                                                                                                                          |                                                                                                                        |                                                                                                                          |                                                                                                                           |                                                                                                                          |                                                                                                                          |     |                                                                                                                          |                                                                                                                           |                                                                                                                        |                                                                                                                           |                                                                                                                        |                                                                                                                          |                                                                                                                           |                                                                                                                           |                                                                                                                        |          |                                                                                                                          |                                                                                                                           |                                                                                                                        |                                                                                                                        |                                                                                                                        |                                                                                                                          |                                                                                                                           |                                                                                                                          |                                                                                                                        |
| De Vries   | <span style="background-color: green; color: white; border: 1px solid black; border-radius: 50%; padding: 2px;">+</span>  | <span style="background-color: green; color: white; border: 1px solid black; border-radius: 50%; padding: 2px;">+</span>                                                                                                                                                                                                                                                                                                                                                                                                                                                                                                                                                                                                                                                                                                                                                                                                                                                                                                                                                                                                                                                                                                                                                                                                                                                                                                                                                                                                                                                                                                                                                                                                                                                                                                                                                                                                                                                                                                                                                                                                                                                                                                                                                                                                                                                                                                                                                                                                                                                                                                                                                                                                                                                                                                                                                                                                                                                                                                                                                                                                                                                                                                                                                                                                                                                                                                                                                                                                                                                                                                                                                                                                                                                                                                                                                                                                                                                                                                                                                                                                                                                                                                                                                                                                                                                                                                                                                                                                                                                                                                                                                                                                                                                                                                                                                                                                                                                                                                                                                                                                                                                                                                                                                                                                                                                                                                                                                                                                                                                                                                                                                                                                                                                                                                                                                                                                                                                                                                                                                                                                                                                                                                                                                                                                                                                                                                                                                                                                                                                                                                                                                                                                                                                                                                                                                                                                                                                                                                                                                                                                                                                                                                                                                                                                                                                                                                                                                                                                                                                                                                                                                                                                                                                                                                                                                                                                                                                                                                                                                                                                                                                                                                                                                                                                                                                                                                                                                                                                                                                                                                                                                                                                                                                                                                                                                                                                                                                                                                                                                                                                                                                                                                                                                                                                                                                                                                                                                                                                                                                                                                                                                                                                                                                                                                                                                                                                                                                                                                                                                                                                                                                                                                                                                                                                                                                                                                                                                                                                                                                                                                                                                                                                                                                                                                                                                                                                                                                                                                                                                                                                                                                                                                                                                                                                                                                                                                                                                                                                                                                                                                                                                                                                                                                                                                                                                                                                                                                                                                                                                                                                                                                                                                                                                                                                                                                                                                                                                                                                                                                                                                                                                                                                                                                                                                                                                                                                                                                                                                                                                                                                                                                                                                                                                                                                                                                                                                                                                                                                                                                                                                                                                                                                                                                                                                                                                                                                                                                                                                                                                                                                                                                                                                                                                                                                                                                                                                                                                                                                                                                                                                                                                                                                                                                                                                                                                                                                                                                                                                                                                                                                                                                                                                                                                                                                                                                                                                                                                                                                                                                                                                                                                                                                                                                                                                                                                                                                                                                                                                                                                                                                                                                                                                                                                                              | <span style="background-color: red; color: white; border: 1px solid black; border-radius: 50%; padding: 2px;">-</span>    | <span style="background-color: yellow; color: black; border: 1px solid black; border-radius: 50%; padding: 2px;">?</span> | <span style="background-color: red; color: white; border: 1px solid black; border-radius: 50%; padding: 2px;">-</span>    | <span style="background-color: green; color: white; border: 1px solid black; border-radius: 50%; padding: 2px;">+</span>  | <span style="background-color: yellow; color: black; border: 1px solid black; border-radius: 50%; padding: 2px;">?</span> | <span style="background-color: red; color: white; border: 1px solid black; border-radius: 50%; padding: 2px;">-</span>    | <span style="background-color: green; color: white; border: 1px solid black; border-radius: 50%; padding: 2px;">+</span> |                                                                                                                          |                                                                                                                          |                                                                                                                          |        |                                                                                                                          |                                                                                                                           |                                                                                                                        |                                                                                                                        |                                                                                                                        |                                                                                                                          |                                                                                                                           |                                                                                                                           |                                                                                                                          |            |                                                                                                                          |                                                                                                                          |                                                                                                                        |                                                                                                                           |                                                                                                                        |                                                                                                                          |                                                                                                                           |                                                                                                                           |                                                                                                                        |          |                                                                                                                          |                                                                                                                          |                                                                                                                        |                                                                                                                           |                                                                                                                        |                                                                                                                          |                                                                                                                           |                                                                                                                        |                                                                                                                          |         |                                                                                                                          |                                                                                                                          |                                                                                                                        |                                                                                                                          |                                                                                                                        |                                                                                                                          |                                                                                                                           |                                                                                                                          |                                                                                                                        |          |                                                                                                                          |                                                                                                                        |                                                                                                                        |                                                                                                                        |                                                                                                                        |                                                                                                                          |                                                                                                                           |                                                                                                                           |                                                                                                                          |           |                                                                                                                          |                                                                                                                          |                                                                                                                        |                                                                                                                        |                                                                                                                        |                                                                                                                          |                                                                                                                          |                                                                                                                           |                                                                                                                        |      |                                                                                                                          |                                                                                                                           |                                                                                                                        |                                                                                                                        |                                                                                                                        |                                                                                                                          |                                                                                                                           |                                                                                                                           |                                                                                                                        |         |                                                                                                                          |                                                                                                                          |                                                                                                                        |                                                                                                                        |                                                                                                                        |                                                                                                                          |                                                                                                                           |                                                                                                                          |                                                                                                                          |          |                                                                                                                          |                                                                                                                           |                                                                                                                        |                                                                                                                        |                                                                                                                        |                                                                                                                          |                                                                                                                          |                                                                                                                        |                                                                                                                        |        |                                                                                                                           |                                                                                                                           |                                                                                                                        |                                                                                                                          |                                                                                                                        |                                                                                                                          |                                                                                                                           |                                                                                                                          |                                                                                                                          |     |                                                                                                                          |                                                                                                                           |                                                                                                                        |                                                                                                                           |                                                                                                                        |                                                                                                                          |                                                                                                                           |                                                                                                                           |                                                                                                                        |          |                                                                                                                          |                                                                                                                           |                                                                                                                        |                                                                                                                        |                                                                                                                        |                                                                                                                          |                                                                                                                           |                                                                                                                          |                                                                                                                        |
| El-Solh    | <span style="background-color: green; color: white; border: 1px solid black; border-radius: 50%; padding: 2px;">+</span>  | <span style="background-color: green; color: white; border: 1px solid black; border-radius: 50%; padding: 2px;">+</span>                                                                                                                                                                                                                                                                                                                                                                                                                                                                                                                                                                                                                                                                                                                                                                                                                                                                                                                                                                                                                                                                                                                                                                                                                                                                                                                                                                                                                                                                                                                                                                                                                                                                                                                                                                                                                                                                                                                                                                                                                                                                                                                                                                                                                                                                                                                                                                                                                                                                                                                                                                                                                                                                                                                                                                                                                                                                                                                                                                                                                                                                                                                                                                                                                                                                                                                                                                                                                                                                                                                                                                                                                                                                                                                                                                                                                                                                                                                                                                                                                                                                                                                                                                                                                                                                                                                                                                                                                                                                                                                                                                                                                                                                                                                                                                                                                                                                                                                                                                                                                                                                                                                                                                                                                                                                                                                                                                                                                                                                                                                                                                                                                                                                                                                                                                                                                                                                                                                                                                                                                                                                                                                                                                                                                                                                                                                                                                                                                                                                                                                                                                                                                                                                                                                                                                                                                                                                                                                                                                                                                                                                                                                                                                                                                                                                                                                                                                                                                                                                                                                                                                                                                                                                                                                                                                                                                                                                                                                                                                                                                                                                                                                                                                                                                                                                                                                                                                                                                                                                                                                                                                                                                                                                                                                                                                                                                                                                                                                                                                                                                                                                                                                                                                                                                                                                                                                                                                                                                                                                                                                                                                                                                                                                                                                                                                                                                                                                                                                                                                                                                                                                                                                                                                                                                                                                                                                                                                                                                                                                                                                                                                                                                                                                                                                                                                                                                                                                                                                                                                                                                                                                                                                                                                                                                                                                                                                                                                                                                                                                                                                                                                                                                                                                                                                                                                                                                                                                                                                                                                                                                                                                                                                                                                                                                                                                                                                                                                                                                                                                                                                                                                                                                                                                                                                                                                                                                                                                                                                                                                                                                                                                                                                                                                                                                                                                                                                                                                                                                                                                                                                                                                                                                                                                                                                                                                                                                                                                                                                                                                                                                                                                                                                                                                                                                                                                                                                                                                                                                                                                                                                                                                                                                                                                                                                                                                                                                                                                                                                                                                                                                                                                                                                                                                                                                                                                                                                                                                                                                                                                                                                                                                                                                                                                                                                                                                                                                                                                                                                                                                                                                                                                                                                                                                              | <span style="background-color: red; color: white; border: 1px solid black; border-radius: 50%; padding: 2px;">-</span>    | <span style="background-color: green; color: white; border: 1px solid black; border-radius: 50%; padding: 2px;">+</span>  | <span style="background-color: red; color: white; border: 1px solid black; border-radius: 50%; padding: 2px;">-</span>    | <span style="background-color: green; color: white; border: 1px solid black; border-radius: 50%; padding: 2px;">+</span>  | <span style="background-color: yellow; color: black; border: 1px solid black; border-radius: 50%; padding: 2px;">?</span> | <span style="background-color: green; color: white; border: 1px solid black; border-radius: 50%; padding: 2px;">+</span>  | <span style="background-color: red; color: white; border: 1px solid black; border-radius: 50%; padding: 2px;">-</span>   |                                                                                                                          |                                                                                                                          |                                                                                                                          |        |                                                                                                                          |                                                                                                                           |                                                                                                                        |                                                                                                                        |                                                                                                                        |                                                                                                                          |                                                                                                                           |                                                                                                                           |                                                                                                                          |            |                                                                                                                          |                                                                                                                          |                                                                                                                        |                                                                                                                           |                                                                                                                        |                                                                                                                          |                                                                                                                           |                                                                                                                           |                                                                                                                        |          |                                                                                                                          |                                                                                                                          |                                                                                                                        |                                                                                                                           |                                                                                                                        |                                                                                                                          |                                                                                                                           |                                                                                                                        |                                                                                                                          |         |                                                                                                                          |                                                                                                                          |                                                                                                                        |                                                                                                                          |                                                                                                                        |                                                                                                                          |                                                                                                                           |                                                                                                                          |                                                                                                                        |          |                                                                                                                          |                                                                                                                        |                                                                                                                        |                                                                                                                        |                                                                                                                        |                                                                                                                          |                                                                                                                           |                                                                                                                           |                                                                                                                          |           |                                                                                                                          |                                                                                                                          |                                                                                                                        |                                                                                                                        |                                                                                                                        |                                                                                                                          |                                                                                                                          |                                                                                                                           |                                                                                                                        |      |                                                                                                                          |                                                                                                                           |                                                                                                                        |                                                                                                                        |                                                                                                                        |                                                                                                                          |                                                                                                                           |                                                                                                                           |                                                                                                                        |         |                                                                                                                          |                                                                                                                          |                                                                                                                        |                                                                                                                        |                                                                                                                        |                                                                                                                          |                                                                                                                           |                                                                                                                          |                                                                                                                          |          |                                                                                                                          |                                                                                                                           |                                                                                                                        |                                                                                                                        |                                                                                                                        |                                                                                                                          |                                                                                                                          |                                                                                                                        |                                                                                                                        |        |                                                                                                                           |                                                                                                                           |                                                                                                                        |                                                                                                                          |                                                                                                                        |                                                                                                                          |                                                                                                                           |                                                                                                                          |                                                                                                                          |     |                                                                                                                          |                                                                                                                           |                                                                                                                        |                                                                                                                           |                                                                                                                        |                                                                                                                          |                                                                                                                           |                                                                                                                           |                                                                                                                        |          |                                                                                                                          |                                                                                                                           |                                                                                                                        |                                                                                                                        |                                                                                                                        |                                                                                                                          |                                                                                                                           |                                                                                                                          |                                                                                                                        |
| Ferguson   | <span style="background-color: green; color: white; border: 1px solid black; border-radius: 50%; padding: 2px;">+</span>  | <span style="background-color: red; color: white; border: 1px solid black; border-radius: 50%; padding: 2px;">-</span>                                                                                                                                                                                                                                                                                                                                                                                                                                                                                                                                                                                                                                                                                                                                                                                                                                                                                                                                                                                                                                                                                                                                                                                                                                                                                                                                                                                                                                                                                                                                                                                                                                                                                                                                                                                                                                                                                                                                                                                                                                                                                                                                                                                                                                                                                                                                                                                                                                                                                                                                                                                                                                                                                                                                                                                                                                                                                                                                                                                                                                                                                                                                                                                                                                                                                                                                                                                                                                                                                                                                                                                                                                                                                                                                                                                                                                                                                                                                                                                                                                                                                                                                                                                                                                                                                                                                                                                                                                                                                                                                                                                                                                                                                                                                                                                                                                                                                                                                                                                                                                                                                                                                                                                                                                                                                                                                                                                                                                                                                                                                                                                                                                                                                                                                                                                                                                                                                                                                                                                                                                                                                                                                                                                                                                                                                                                                                                                                                                                                                                                                                                                                                                                                                                                                                                                                                                                                                                                                                                                                                                                                                                                                                                                                                                                                                                                                                                                                                                                                                                                                                                                                                                                                                                                                                                                                                                                                                                                                                                                                                                                                                                                                                                                                                                                                                                                                                                                                                                                                                                                                                                                                                                                                                                                                                                                                                                                                                                                                                                                                                                                                                                                                                                                                                                                                                                                                                                                                                                                                                                                                                                                                                                                                                                                                                                                                                                                                                                                                                                                                                                                                                                                                                                                                                                                                                                                                                                                                                                                                                                                                                                                                                                                                                                                                                                                                                                                                                                                                                                                                                                                                                                                                                                                                                                                                                                                                                                                                                                                                                                                                                                                                                                                                                                                                                                                                                                                                                                                                                                                                                                                                                                                                                                                                                                                                                                                                                                                                                                                                                                                                                                                                                                                                                                                                                                                                                                                                                                                                                                                                                                                                                                                                                                                                                                                                                                                                                                                                                                                                                                                                                                                                                                                                                                                                                                                                                                                                                                                                                                                                                                                                                                                                                                                                                                                                                                                                                                                                                                                                                                                                                                                                                                                                                                                                                                                                                                                                                                                                                                                                                                                                                                                                                                                                                                                                                                                                                                                                                                                                                                                                                                                                                                                                                                                                                                                                                                                                                                                                                                                                                                                                                                                                                                                | <span style="background-color: red; color: white; border: 1px solid black; border-radius: 50%; padding: 2px;">-</span>    | <span style="background-color: red; color: white; border: 1px solid black; border-radius: 50%; padding: 2px;">-</span>    | <span style="background-color: red; color: white; border: 1px solid black; border-radius: 50%; padding: 2px;">-</span>    | <span style="background-color: green; color: white; border: 1px solid black; border-radius: 50%; padding: 2px;">+</span>  | <span style="background-color: yellow; color: black; border: 1px solid black; border-radius: 50%; padding: 2px;">?</span> | <span style="background-color: yellow; color: black; border: 1px solid black; border-radius: 50%; padding: 2px;">?</span> | <span style="background-color: green; color: white; border: 1px solid black; border-radius: 50%; padding: 2px;">+</span> |                                                                                                                          |                                                                                                                          |                                                                                                                          |        |                                                                                                                          |                                                                                                                           |                                                                                                                        |                                                                                                                        |                                                                                                                        |                                                                                                                          |                                                                                                                           |                                                                                                                           |                                                                                                                          |            |                                                                                                                          |                                                                                                                          |                                                                                                                        |                                                                                                                           |                                                                                                                        |                                                                                                                          |                                                                                                                           |                                                                                                                           |                                                                                                                        |          |                                                                                                                          |                                                                                                                          |                                                                                                                        |                                                                                                                           |                                                                                                                        |                                                                                                                          |                                                                                                                           |                                                                                                                        |                                                                                                                          |         |                                                                                                                          |                                                                                                                          |                                                                                                                        |                                                                                                                          |                                                                                                                        |                                                                                                                          |                                                                                                                           |                                                                                                                          |                                                                                                                        |          |                                                                                                                          |                                                                                                                        |                                                                                                                        |                                                                                                                        |                                                                                                                        |                                                                                                                          |                                                                                                                           |                                                                                                                           |                                                                                                                          |           |                                                                                                                          |                                                                                                                          |                                                                                                                        |                                                                                                                        |                                                                                                                        |                                                                                                                          |                                                                                                                          |                                                                                                                           |                                                                                                                        |      |                                                                                                                          |                                                                                                                           |                                                                                                                        |                                                                                                                        |                                                                                                                        |                                                                                                                          |                                                                                                                           |                                                                                                                           |                                                                                                                        |         |                                                                                                                          |                                                                                                                          |                                                                                                                        |                                                                                                                        |                                                                                                                        |                                                                                                                          |                                                                                                                           |                                                                                                                          |                                                                                                                          |          |                                                                                                                          |                                                                                                                           |                                                                                                                        |                                                                                                                        |                                                                                                                        |                                                                                                                          |                                                                                                                          |                                                                                                                        |                                                                                                                        |        |                                                                                                                           |                                                                                                                           |                                                                                                                        |                                                                                                                          |                                                                                                                        |                                                                                                                          |                                                                                                                           |                                                                                                                          |                                                                                                                          |     |                                                                                                                          |                                                                                                                           |                                                                                                                        |                                                                                                                           |                                                                                                                        |                                                                                                                          |                                                                                                                           |                                                                                                                           |                                                                                                                        |          |                                                                                                                          |                                                                                                                           |                                                                                                                        |                                                                                                                        |                                                                                                                        |                                                                                                                          |                                                                                                                           |                                                                                                                          |                                                                                                                        |
| Gagnadoux  | <span style="background-color: green; color: white; border: 1px solid black; border-radius: 50%; padding: 2px;">+</span>  | <span style="background-color: green; color: white; border: 1px solid black; border-radius: 50%; padding: 2px;">+</span>                                                                                                                                                                                                                                                                                                                                                                                                                                                                                                                                                                                                                                                                                                                                                                                                                                                                                                                                                                                                                                                                                                                                                                                                                                                                                                                                                                                                                                                                                                                                                                                                                                                                                                                                                                                                                                                                                                                                                                                                                                                                                                                                                                                                                                                                                                                                                                                                                                                                                                                                                                                                                                                                                                                                                                                                                                                                                                                                                                                                                                                                                                                                                                                                                                                                                                                                                                                                                                                                                                                                                                                                                                                                                                                                                                                                                                                                                                                                                                                                                                                                                                                                                                                                                                                                                                                                                                                                                                                                                                                                                                                                                                                                                                                                                                                                                                                                                                                                                                                                                                                                                                                                                                                                                                                                                                                                                                                                                                                                                                                                                                                                                                                                                                                                                                                                                                                                                                                                                                                                                                                                                                                                                                                                                                                                                                                                                                                                                                                                                                                                                                                                                                                                                                                                                                                                                                                                                                                                                                                                                                                                                                                                                                                                                                                                                                                                                                                                                                                                                                                                                                                                                                                                                                                                                                                                                                                                                                                                                                                                                                                                                                                                                                                                                                                                                                                                                                                                                                                                                                                                                                                                                                                                                                                                                                                                                                                                                                                                                                                                                                                                                                                                                                                                                                                                                                                                                                                                                                                                                                                                                                                                                                                                                                                                                                                                                                                                                                                                                                                                                                                                                                                                                                                                                                                                                                                                                                                                                                                                                                                                                                                                                                                                                                                                                                                                                                                                                                                                                                                                                                                                                                                                                                                                                                                                                                                                                                                                                                                                                                                                                                                                                                                                                                                                                                                                                                                                                                                                                                                                                                                                                                                                                                                                                                                                                                                                                                                                                                                                                                                                                                                                                                                                                                                                                                                                                                                                                                                                                                                                                                                                                                                                                                                                                                                                                                                                                                                                                                                                                                                                                                                                                                                                                                                                                                                                                                                                                                                                                                                                                                                                                                                                                                                                                                                                                                                                                                                                                                                                                                                                                                                                                                                                                                                                                                                                                                                                                                                                                                                                                                                                                                                                                                                                                                                                                                                                                                                                                                                                                                                                                                                                                                                                                                                                                                                                                                                                                                                                                                                                                                                                                                                                                                              | <span style="background-color: red; color: white; border: 1px solid black; border-radius: 50%; padding: 2px;">-</span>    | <span style="background-color: red; color: white; border: 1px solid black; border-radius: 50%; padding: 2px;">-</span>    | <span style="background-color: red; color: white; border: 1px solid black; border-radius: 50%; padding: 2px;">-</span>    | <span style="background-color: green; color: white; border: 1px solid black; border-radius: 50%; padding: 2px;">+</span>  | <span style="background-color: green; color: white; border: 1px solid black; border-radius: 50%; padding: 2px;">+</span>  | <span style="background-color: yellow; color: black; border: 1px solid black; border-radius: 50%; padding: 2px;">?</span> | <span style="background-color: red; color: white; border: 1px solid black; border-radius: 50%; padding: 2px;">-</span>   |                                                                                                                          |                                                                                                                          |                                                                                                                          |        |                                                                                                                          |                                                                                                                           |                                                                                                                        |                                                                                                                        |                                                                                                                        |                                                                                                                          |                                                                                                                           |                                                                                                                           |                                                                                                                          |            |                                                                                                                          |                                                                                                                          |                                                                                                                        |                                                                                                                           |                                                                                                                        |                                                                                                                          |                                                                                                                           |                                                                                                                           |                                                                                                                        |          |                                                                                                                          |                                                                                                                          |                                                                                                                        |                                                                                                                           |                                                                                                                        |                                                                                                                          |                                                                                                                           |                                                                                                                        |                                                                                                                          |         |                                                                                                                          |                                                                                                                          |                                                                                                                        |                                                                                                                          |                                                                                                                        |                                                                                                                          |                                                                                                                           |                                                                                                                          |                                                                                                                        |          |                                                                                                                          |                                                                                                                        |                                                                                                                        |                                                                                                                        |                                                                                                                        |                                                                                                                          |                                                                                                                           |                                                                                                                           |                                                                                                                          |           |                                                                                                                          |                                                                                                                          |                                                                                                                        |                                                                                                                        |                                                                                                                        |                                                                                                                          |                                                                                                                          |                                                                                                                           |                                                                                                                        |      |                                                                                                                          |                                                                                                                           |                                                                                                                        |                                                                                                                        |                                                                                                                        |                                                                                                                          |                                                                                                                           |                                                                                                                           |                                                                                                                        |         |                                                                                                                          |                                                                                                                          |                                                                                                                        |                                                                                                                        |                                                                                                                        |                                                                                                                          |                                                                                                                           |                                                                                                                          |                                                                                                                          |          |                                                                                                                          |                                                                                                                           |                                                                                                                        |                                                                                                                        |                                                                                                                        |                                                                                                                          |                                                                                                                          |                                                                                                                        |                                                                                                                        |        |                                                                                                                           |                                                                                                                           |                                                                                                                        |                                                                                                                          |                                                                                                                        |                                                                                                                          |                                                                                                                           |                                                                                                                          |                                                                                                                          |     |                                                                                                                          |                                                                                                                           |                                                                                                                        |                                                                                                                           |                                                                                                                        |                                                                                                                          |                                                                                                                           |                                                                                                                           |                                                                                                                        |          |                                                                                                                          |                                                                                                                           |                                                                                                                        |                                                                                                                        |                                                                                                                        |                                                                                                                          |                                                                                                                           |                                                                                                                          |                                                                                                                        |
| Glos       | <span style="background-color: green; color: white; border: 1px solid black; border-radius: 50%; padding: 2px;">+</span>  | <span style="background-color: yellow; color: black; border: 1px solid black; border-radius: 50%; padding: 2px;">?</span>                                                                                                                                                                                                                                                                                                                                                                                                                                                                                                                                                                                                                                                                                                                                                                                                                                                                                                                                                                                                                                                                                                                                                                                                                                                                                                                                                                                                                                                                                                                                                                                                                                                                                                                                                                                                                                                                                                                                                                                                                                                                                                                                                                                                                                                                                                                                                                                                                                                                                                                                                                                                                                                                                                                                                                                                                                                                                                                                                                                                                                                                                                                                                                                                                                                                                                                                                                                                                                                                                                                                                                                                                                                                                                                                                                                                                                                                                                                                                                                                                                                                                                                                                                                                                                                                                                                                                                                                                                                                                                                                                                                                                                                                                                                                                                                                                                                                                                                                                                                                                                                                                                                                                                                                                                                                                                                                                                                                                                                                                                                                                                                                                                                                                                                                                                                                                                                                                                                                                                                                                                                                                                                                                                                                                                                                                                                                                                                                                                                                                                                                                                                                                                                                                                                                                                                                                                                                                                                                                                                                                                                                                                                                                                                                                                                                                                                                                                                                                                                                                                                                                                                                                                                                                                                                                                                                                                                                                                                                                                                                                                                                                                                                                                                                                                                                                                                                                                                                                                                                                                                                                                                                                                                                                                                                                                                                                                                                                                                                                                                                                                                                                                                                                                                                                                                                                                                                                                                                                                                                                                                                                                                                                                                                                                                                                                                                                                                                                                                                                                                                                                                                                                                                                                                                                                                                                                                                                                                                                                                                                                                                                                                                                                                                                                                                                                                                                                                                                                                                                                                                                                                                                                                                                                                                                                                                                                                                                                                                                                                                                                                                                                                                                                                                                                                                                                                                                                                                                                                                                                                                                                                                                                                                                                                                                                                                                                                                                                                                                                                                                                                                                                                                                                                                                                                                                                                                                                                                                                                                                                                                                                                                                                                                                                                                                                                                                                                                                                                                                                                                                                                                                                                                                                                                                                                                                                                                                                                                                                                                                                                                                                                                                                                                                                                                                                                                                                                                                                                                                                                                                                                                                                                                                                                                                                                                                                                                                                                                                                                                                                                                                                                                                                                                                                                                                                                                                                                                                                                                                                                                                                                                                                                                                                                                                                                                                                                                                                                                                                                                                                                                                                                                                                                                                                             | <span style="background-color: red; color: white; border: 1px solid black; border-radius: 50%; padding: 2px;">-</span>    | <span style="background-color: red; color: white; border: 1px solid black; border-radius: 50%; padding: 2px;">-</span>    | <span style="background-color: red; color: white; border: 1px solid black; border-radius: 50%; padding: 2px;">-</span>    | <span style="background-color: green; color: white; border: 1px solid black; border-radius: 50%; padding: 2px;">+</span>  | <span style="background-color: yellow; color: black; border: 1px solid black; border-radius: 50%; padding: 2px;">?</span> | <span style="background-color: yellow; color: black; border: 1px solid black; border-radius: 50%; padding: 2px;">?</span> | <span style="background-color: red; color: white; border: 1px solid black; border-radius: 50%; padding: 2px;">-</span>   |                                                                                                                          |                                                                                                                          |                                                                                                                          |        |                                                                                                                          |                                                                                                                           |                                                                                                                        |                                                                                                                        |                                                                                                                        |                                                                                                                          |                                                                                                                           |                                                                                                                           |                                                                                                                          |            |                                                                                                                          |                                                                                                                          |                                                                                                                        |                                                                                                                           |                                                                                                                        |                                                                                                                          |                                                                                                                           |                                                                                                                           |                                                                                                                        |          |                                                                                                                          |                                                                                                                          |                                                                                                                        |                                                                                                                           |                                                                                                                        |                                                                                                                          |                                                                                                                           |                                                                                                                        |                                                                                                                          |         |                                                                                                                          |                                                                                                                          |                                                                                                                        |                                                                                                                          |                                                                                                                        |                                                                                                                          |                                                                                                                           |                                                                                                                          |                                                                                                                        |          |                                                                                                                          |                                                                                                                        |                                                                                                                        |                                                                                                                        |                                                                                                                        |                                                                                                                          |                                                                                                                           |                                                                                                                           |                                                                                                                          |           |                                                                                                                          |                                                                                                                          |                                                                                                                        |                                                                                                                        |                                                                                                                        |                                                                                                                          |                                                                                                                          |                                                                                                                           |                                                                                                                        |      |                                                                                                                          |                                                                                                                           |                                                                                                                        |                                                                                                                        |                                                                                                                        |                                                                                                                          |                                                                                                                           |                                                                                                                           |                                                                                                                        |         |                                                                                                                          |                                                                                                                          |                                                                                                                        |                                                                                                                        |                                                                                                                        |                                                                                                                          |                                                                                                                           |                                                                                                                          |                                                                                                                          |          |                                                                                                                          |                                                                                                                           |                                                                                                                        |                                                                                                                        |                                                                                                                        |                                                                                                                          |                                                                                                                          |                                                                                                                        |                                                                                                                        |        |                                                                                                                           |                                                                                                                           |                                                                                                                        |                                                                                                                          |                                                                                                                        |                                                                                                                          |                                                                                                                           |                                                                                                                          |                                                                                                                          |     |                                                                                                                          |                                                                                                                           |                                                                                                                        |                                                                                                                           |                                                                                                                        |                                                                                                                          |                                                                                                                           |                                                                                                                           |                                                                                                                        |          |                                                                                                                          |                                                                                                                           |                                                                                                                        |                                                                                                                        |                                                                                                                        |                                                                                                                          |                                                                                                                           |                                                                                                                          |                                                                                                                        |
| Hoekema    | <span style="background-color: green; color: white; border: 1px solid black; border-radius: 50%; padding: 2px;">+</span>  | <span style="background-color: green; color: white; border: 1px solid black; border-radius: 50%; padding: 2px;">+</span>                                                                                                                                                                                                                                                                                                                                                                                                                                                                                                                                                                                                                                                                                                                                                                                                                                                                                                                                                                                                                                                                                                                                                                                                                                                                                                                                                                                                                                                                                                                                                                                                                                                                                                                                                                                                                                                                                                                                                                                                                                                                                                                                                                                                                                                                                                                                                                                                                                                                                                                                                                                                                                                                                                                                                                                                                                                                                                                                                                                                                                                                                                                                                                                                                                                                                                                                                                                                                                                                                                                                                                                                                                                                                                                                                                                                                                                                                                                                                                                                                                                                                                                                                                                                                                                                                                                                                                                                                                                                                                                                                                                                                                                                                                                                                                                                                                                                                                                                                                                                                                                                                                                                                                                                                                                                                                                                                                                                                                                                                                                                                                                                                                                                                                                                                                                                                                                                                                                                                                                                                                                                                                                                                                                                                                                                                                                                                                                                                                                                                                                                                                                                                                                                                                                                                                                                                                                                                                                                                                                                                                                                                                                                                                                                                                                                                                                                                                                                                                                                                                                                                                                                                                                                                                                                                                                                                                                                                                                                                                                                                                                                                                                                                                                                                                                                                                                                                                                                                                                                                                                                                                                                                                                                                                                                                                                                                                                                                                                                                                                                                                                                                                                                                                                                                                                                                                                                                                                                                                                                                                                                                                                                                                                                                                                                                                                                                                                                                                                                                                                                                                                                                                                                                                                                                                                                                                                                                                                                                                                                                                                                                                                                                                                                                                                                                                                                                                                                                                                                                                                                                                                                                                                                                                                                                                                                                                                                                                                                                                                                                                                                                                                                                                                                                                                                                                                                                                                                                                                                                                                                                                                                                                                                                                                                                                                                                                                                                                                                                                                                                                                                                                                                                                                                                                                                                                                                                                                                                                                                                                                                                                                                                                                                                                                                                                                                                                                                                                                                                                                                                                                                                                                                                                                                                                                                                                                                                                                                                                                                                                                                                                                                                                                                                                                                                                                                                                                                                                                                                                                                                                                                                                                                                                                                                                                                                                                                                                                                                                                                                                                                                                                                                                                                                                                                                                                                                                                                                                                                                                                                                                                                                                                                                                                                                                                                                                                                                                                                                                                                                                                                                                                                                                                                                                              | <span style="background-color: red; color: white; border: 1px solid black; border-radius: 50%; padding: 2px;">-</span>    | <span style="background-color: red; color: white; border: 1px solid black; border-radius: 50%; padding: 2px;">-</span>    | <span style="background-color: red; color: white; border: 1px solid black; border-radius: 50%; padding: 2px;">-</span>    | <span style="background-color: green; color: white; border: 1px solid black; border-radius: 50%; padding: 2px;">+</span>  | <span style="background-color: yellow; color: black; border: 1px solid black; border-radius: 50%; padding: 2px;">?</span> | <span style="background-color: green; color: white; border: 1px solid black; border-radius: 50%; padding: 2px;">+</span>  | <span style="background-color: green; color: white; border: 1px solid black; border-radius: 50%; padding: 2px;">+</span> |                                                                                                                          |                                                                                                                          |                                                                                                                          |        |                                                                                                                          |                                                                                                                           |                                                                                                                        |                                                                                                                        |                                                                                                                        |                                                                                                                          |                                                                                                                           |                                                                                                                           |                                                                                                                          |            |                                                                                                                          |                                                                                                                          |                                                                                                                        |                                                                                                                           |                                                                                                                        |                                                                                                                          |                                                                                                                           |                                                                                                                           |                                                                                                                        |          |                                                                                                                          |                                                                                                                          |                                                                                                                        |                                                                                                                           |                                                                                                                        |                                                                                                                          |                                                                                                                           |                                                                                                                        |                                                                                                                          |         |                                                                                                                          |                                                                                                                          |                                                                                                                        |                                                                                                                          |                                                                                                                        |                                                                                                                          |                                                                                                                           |                                                                                                                          |                                                                                                                        |          |                                                                                                                          |                                                                                                                        |                                                                                                                        |                                                                                                                        |                                                                                                                        |                                                                                                                          |                                                                                                                           |                                                                                                                           |                                                                                                                          |           |                                                                                                                          |                                                                                                                          |                                                                                                                        |                                                                                                                        |                                                                                                                        |                                                                                                                          |                                                                                                                          |                                                                                                                           |                                                                                                                        |      |                                                                                                                          |                                                                                                                           |                                                                                                                        |                                                                                                                        |                                                                                                                        |                                                                                                                          |                                                                                                                           |                                                                                                                           |                                                                                                                        |         |                                                                                                                          |                                                                                                                          |                                                                                                                        |                                                                                                                        |                                                                                                                        |                                                                                                                          |                                                                                                                           |                                                                                                                          |                                                                                                                          |          |                                                                                                                          |                                                                                                                           |                                                                                                                        |                                                                                                                        |                                                                                                                        |                                                                                                                          |                                                                                                                          |                                                                                                                        |                                                                                                                        |        |                                                                                                                           |                                                                                                                           |                                                                                                                        |                                                                                                                          |                                                                                                                        |                                                                                                                          |                                                                                                                           |                                                                                                                          |                                                                                                                          |     |                                                                                                                          |                                                                                                                           |                                                                                                                        |                                                                                                                           |                                                                                                                        |                                                                                                                          |                                                                                                                           |                                                                                                                           |                                                                                                                        |          |                                                                                                                          |                                                                                                                           |                                                                                                                        |                                                                                                                        |                                                                                                                        |                                                                                                                          |                                                                                                                           |                                                                                                                          |                                                                                                                        |
| Phillips   | <span style="background-color: green; color: white; border: 1px solid black; border-radius: 50%; padding: 2px;">+</span>  | <span style="background-color: yellow; color: black; border: 1px solid black; border-radius: 50%; padding: 2px;">?</span>                                                                                                                                                                                                                                                                                                                                                                                                                                                                                                                                                                                                                                                                                                                                                                                                                                                                                                                                                                                                                                                                                                                                                                                                                                                                                                                                                                                                                                                                                                                                                                                                                                                                                                                                                                                                                                                                                                                                                                                                                                                                                                                                                                                                                                                                                                                                                                                                                                                                                                                                                                                                                                                                                                                                                                                                                                                                                                                                                                                                                                                                                                                                                                                                                                                                                                                                                                                                                                                                                                                                                                                                                                                                                                                                                                                                                                                                                                                                                                                                                                                                                                                                                                                                                                                                                                                                                                                                                                                                                                                                                                                                                                                                                                                                                                                                                                                                                                                                                                                                                                                                                                                                                                                                                                                                                                                                                                                                                                                                                                                                                                                                                                                                                                                                                                                                                                                                                                                                                                                                                                                                                                                                                                                                                                                                                                                                                                                                                                                                                                                                                                                                                                                                                                                                                                                                                                                                                                                                                                                                                                                                                                                                                                                                                                                                                                                                                                                                                                                                                                                                                                                                                                                                                                                                                                                                                                                                                                                                                                                                                                                                                                                                                                                                                                                                                                                                                                                                                                                                                                                                                                                                                                                                                                                                                                                                                                                                                                                                                                                                                                                                                                                                                                                                                                                                                                                                                                                                                                                                                                                                                                                                                                                                                                                                                                                                                                                                                                                                                                                                                                                                                                                                                                                                                                                                                                                                                                                                                                                                                                                                                                                                                                                                                                                                                                                                                                                                                                                                                                                                                                                                                                                                                                                                                                                                                                                                                                                                                                                                                                                                                                                                                                                                                                                                                                                                                                                                                                                                                                                                                                                                                                                                                                                                                                                                                                                                                                                                                                                                                                                                                                                                                                                                                                                                                                                                                                                                                                                                                                                                                                                                                                                                                                                                                                                                                                                                                                                                                                                                                                                                                                                                                                                                                                                                                                                                                                                                                                                                                                                                                                                                                                                                                                                                                                                                                                                                                                                                                                                                                                                                                                                                                                                                                                                                                                                                                                                                                                                                                                                                                                                                                                                                                                                                                                                                                                                                                                                                                                                                                                                                                                                                                                                                                                                                                                                                                                                                                                                                                                                                                                                                                                                                                                             | <span style="background-color: red; color: white; border: 1px solid black; border-radius: 50%; padding: 2px;">-</span>    | <span style="background-color: red; color: white; border: 1px solid black; border-radius: 50%; padding: 2px;">-</span>    | <span style="background-color: red; color: white; border: 1px solid black; border-radius: 50%; padding: 2px;">-</span>    | <span style="background-color: green; color: white; border: 1px solid black; border-radius: 50%; padding: 2px;">+</span>  | <span style="background-color: green; color: white; border: 1px solid black; border-radius: 50%; padding: 2px;">+</span>  | <span style="background-color: red; color: white; border: 1px solid black; border-radius: 50%; padding: 2px;">-</span>    | <span style="background-color: red; color: white; border: 1px solid black; border-radius: 50%; padding: 2px;">-</span>   |                                                                                                                          |                                                                                                                          |                                                                                                                          |        |                                                                                                                          |                                                                                                                           |                                                                                                                        |                                                                                                                        |                                                                                                                        |                                                                                                                          |                                                                                                                           |                                                                                                                           |                                                                                                                          |            |                                                                                                                          |                                                                                                                          |                                                                                                                        |                                                                                                                           |                                                                                                                        |                                                                                                                          |                                                                                                                           |                                                                                                                           |                                                                                                                        |          |                                                                                                                          |                                                                                                                          |                                                                                                                        |                                                                                                                           |                                                                                                                        |                                                                                                                          |                                                                                                                           |                                                                                                                        |                                                                                                                          |         |                                                                                                                          |                                                                                                                          |                                                                                                                        |                                                                                                                          |                                                                                                                        |                                                                                                                          |                                                                                                                           |                                                                                                                          |                                                                                                                        |          |                                                                                                                          |                                                                                                                        |                                                                                                                        |                                                                                                                        |                                                                                                                        |                                                                                                                          |                                                                                                                           |                                                                                                                           |                                                                                                                          |           |                                                                                                                          |                                                                                                                          |                                                                                                                        |                                                                                                                        |                                                                                                                        |                                                                                                                          |                                                                                                                          |                                                                                                                           |                                                                                                                        |      |                                                                                                                          |                                                                                                                           |                                                                                                                        |                                                                                                                        |                                                                                                                        |                                                                                                                          |                                                                                                                           |                                                                                                                           |                                                                                                                        |         |                                                                                                                          |                                                                                                                          |                                                                                                                        |                                                                                                                        |                                                                                                                        |                                                                                                                          |                                                                                                                           |                                                                                                                          |                                                                                                                          |          |                                                                                                                          |                                                                                                                           |                                                                                                                        |                                                                                                                        |                                                                                                                        |                                                                                                                          |                                                                                                                          |                                                                                                                        |                                                                                                                        |        |                                                                                                                           |                                                                                                                           |                                                                                                                        |                                                                                                                          |                                                                                                                        |                                                                                                                          |                                                                                                                           |                                                                                                                          |                                                                                                                          |     |                                                                                                                          |                                                                                                                           |                                                                                                                        |                                                                                                                           |                                                                                                                        |                                                                                                                          |                                                                                                                           |                                                                                                                           |                                                                                                                        |          |                                                                                                                          |                                                                                                                           |                                                                                                                        |                                                                                                                        |                                                                                                                        |                                                                                                                          |                                                                                                                           |                                                                                                                          |                                                                                                                        |
| Schutz     | <span style="background-color: yellow; color: black; border: 1px solid black; border-radius: 50%; padding: 2px;">?</span> | <span style="background-color: yellow; color: black; border: 1px solid black; border-radius: 50%; padding: 2px;">?</span>                                                                                                                                                                                                                                                                                                                                                                                                                                                                                                                                                                                                                                                                                                                                                                                                                                                                                                                                                                                                                                                                                                                                                                                                                                                                                                                                                                                                                                                                                                                                                                                                                                                                                                                                                                                                                                                                                                                                                                                                                                                                                                                                                                                                                                                                                                                                                                                                                                                                                                                                                                                                                                                                                                                                                                                                                                                                                                                                                                                                                                                                                                                                                                                                                                                                                                                                                                                                                                                                                                                                                                                                                                                                                                                                                                                                                                                                                                                                                                                                                                                                                                                                                                                                                                                                                                                                                                                                                                                                                                                                                                                                                                                                                                                                                                                                                                                                                                                                                                                                                                                                                                                                                                                                                                                                                                                                                                                                                                                                                                                                                                                                                                                                                                                                                                                                                                                                                                                                                                                                                                                                                                                                                                                                                                                                                                                                                                                                                                                                                                                                                                                                                                                                                                                                                                                                                                                                                                                                                                                                                                                                                                                                                                                                                                                                                                                                                                                                                                                                                                                                                                                                                                                                                                                                                                                                                                                                                                                                                                                                                                                                                                                                                                                                                                                                                                                                                                                                                                                                                                                                                                                                                                                                                                                                                                                                                                                                                                                                                                                                                                                                                                                                                                                                                                                                                                                                                                                                                                                                                                                                                                                                                                                                                                                                                                                                                                                                                                                                                                                                                                                                                                                                                                                                                                                                                                                                                                                                                                                                                                                                                                                                                                                                                                                                                                                                                                                                                                                                                                                                                                                                                                                                                                                                                                                                                                                                                                                                                                                                                                                                                                                                                                                                                                                                                                                                                                                                                                                                                                                                                                                                                                                                                                                                                                                                                                                                                                                                                                                                                                                                                                                                                                                                                                                                                                                                                                                                                                                                                                                                                                                                                                                                                                                                                                                                                                                                                                                                                                                                                                                                                                                                                                                                                                                                                                                                                                                                                                                                                                                                                                                                                                                                                                                                                                                                                                                                                                                                                                                                                                                                                                                                                                                                                                                                                                                                                                                                                                                                                                                                                                                                                                                                                                                                                                                                                                                                                                                                                                                                                                                                                                                                                                                                                                                                                                                                                                                                                                                                                                                                                                                                                                                                                                             | <span style="background-color: red; color: white; border: 1px solid black; border-radius: 50%; padding: 2px;">-</span>    | <span style="background-color: green; color: white; border: 1px solid black; border-radius: 50%; padding: 2px;">+</span>  | <span style="background-color: red; color: white; border: 1px solid black; border-radius: 50%; padding: 2px;">-</span>    | <span style="background-color: green; color: white; border: 1px solid black; border-radius: 50%; padding: 2px;">+</span>  | <span style="background-color: yellow; color: black; border: 1px solid black; border-radius: 50%; padding: 2px;">?</span> | <span style="background-color: green; color: white; border: 1px solid black; border-radius: 50%; padding: 2px;">+</span>  | <span style="background-color: green; color: white; border: 1px solid black; border-radius: 50%; padding: 2px;">+</span> |                                                                                                                          |                                                                                                                          |                                                                                                                          |        |                                                                                                                          |                                                                                                                           |                                                                                                                        |                                                                                                                        |                                                                                                                        |                                                                                                                          |                                                                                                                           |                                                                                                                           |                                                                                                                          |            |                                                                                                                          |                                                                                                                          |                                                                                                                        |                                                                                                                           |                                                                                                                        |                                                                                                                          |                                                                                                                           |                                                                                                                           |                                                                                                                        |          |                                                                                                                          |                                                                                                                          |                                                                                                                        |                                                                                                                           |                                                                                                                        |                                                                                                                          |                                                                                                                           |                                                                                                                        |                                                                                                                          |         |                                                                                                                          |                                                                                                                          |                                                                                                                        |                                                                                                                          |                                                                                                                        |                                                                                                                          |                                                                                                                           |                                                                                                                          |                                                                                                                        |          |                                                                                                                          |                                                                                                                        |                                                                                                                        |                                                                                                                        |                                                                                                                        |                                                                                                                          |                                                                                                                           |                                                                                                                           |                                                                                                                          |           |                                                                                                                          |                                                                                                                          |                                                                                                                        |                                                                                                                        |                                                                                                                        |                                                                                                                          |                                                                                                                          |                                                                                                                           |                                                                                                                        |      |                                                                                                                          |                                                                                                                           |                                                                                                                        |                                                                                                                        |                                                                                                                        |                                                                                                                          |                                                                                                                           |                                                                                                                           |                                                                                                                        |         |                                                                                                                          |                                                                                                                          |                                                                                                                        |                                                                                                                        |                                                                                                                        |                                                                                                                          |                                                                                                                           |                                                                                                                          |                                                                                                                          |          |                                                                                                                          |                                                                                                                           |                                                                                                                        |                                                                                                                        |                                                                                                                        |                                                                                                                          |                                                                                                                          |                                                                                                                        |                                                                                                                        |        |                                                                                                                           |                                                                                                                           |                                                                                                                        |                                                                                                                          |                                                                                                                        |                                                                                                                          |                                                                                                                           |                                                                                                                          |                                                                                                                          |     |                                                                                                                          |                                                                                                                           |                                                                                                                        |                                                                                                                           |                                                                                                                        |                                                                                                                          |                                                                                                                           |                                                                                                                           |                                                                                                                        |          |                                                                                                                          |                                                                                                                           |                                                                                                                        |                                                                                                                        |                                                                                                                        |                                                                                                                          |                                                                                                                           |                                                                                                                          |                                                                                                                        |
| Tan        | <span style="background-color: green; color: white; border: 1px solid black; border-radius: 50%; padding: 2px;">+</span>  | <span style="background-color: yellow; color: black; border: 1px solid black; border-radius: 50%; padding: 2px;">?</span>                                                                                                                                                                                                                                                                                                                                                                                                                                                                                                                                                                                                                                                                                                                                                                                                                                                                                                                                                                                                                                                                                                                                                                                                                                                                                                                                                                                                                                                                                                                                                                                                                                                                                                                                                                                                                                                                                                                                                                                                                                                                                                                                                                                                                                                                                                                                                                                                                                                                                                                                                                                                                                                                                                                                                                                                                                                                                                                                                                                                                                                                                                                                                                                                                                                                                                                                                                                                                                                                                                                                                                                                                                                                                                                                                                                                                                                                                                                                                                                                                                                                                                                                                                                                                                                                                                                                                                                                                                                                                                                                                                                                                                                                                                                                                                                                                                                                                                                                                                                                                                                                                                                                                                                                                                                                                                                                                                                                                                                                                                                                                                                                                                                                                                                                                                                                                                                                                                                                                                                                                                                                                                                                                                                                                                                                                                                                                                                                                                                                                                                                                                                                                                                                                                                                                                                                                                                                                                                                                                                                                                                                                                                                                                                                                                                                                                                                                                                                                                                                                                                                                                                                                                                                                                                                                                                                                                                                                                                                                                                                                                                                                                                                                                                                                                                                                                                                                                                                                                                                                                                                                                                                                                                                                                                                                                                                                                                                                                                                                                                                                                                                                                                                                                                                                                                                                                                                                                                                                                                                                                                                                                                                                                                                                                                                                                                                                                                                                                                                                                                                                                                                                                                                                                                                                                                                                                                                                                                                                                                                                                                                                                                                                                                                                                                                                                                                                                                                                                                                                                                                                                                                                                                                                                                                                                                                                                                                                                                                                                                                                                                                                                                                                                                                                                                                                                                                                                                                                                                                                                                                                                                                                                                                                                                                                                                                                                                                                                                                                                                                                                                                                                                                                                                                                                                                                                                                                                                                                                                                                                                                                                                                                                                                                                                                                                                                                                                                                                                                                                                                                                                                                                                                                                                                                                                                                                                                                                                                                                                                                                                                                                                                                                                                                                                                                                                                                                                                                                                                                                                                                                                                                                                                                                                                                                                                                                                                                                                                                                                                                                                                                                                                                                                                                                                                                                                                                                                                                                                                                                                                                                                                                                                                                                                                                                                                                                                                                                                                                                                                                                                                                                                                                                                                                                             | <span style="background-color: red; color: white; border: 1px solid black; border-radius: 50%; padding: 2px;">-</span>    | <span style="background-color: yellow; color: black; border: 1px solid black; border-radius: 50%; padding: 2px;">?</span> | <span style="background-color: red; color: white; border: 1px solid black; border-radius: 50%; padding: 2px;">-</span>    | <span style="background-color: green; color: white; border: 1px solid black; border-radius: 50%; padding: 2px;">+</span>  | <span style="background-color: yellow; color: black; border: 1px solid black; border-radius: 50%; padding: 2px;">?</span> | <span style="background-color: yellow; color: black; border: 1px solid black; border-radius: 50%; padding: 2px;">?</span> | <span style="background-color: red; color: white; border: 1px solid black; border-radius: 50%; padding: 2px;">-</span>   |                                                                                                                          |                                                                                                                          |                                                                                                                          |        |                                                                                                                          |                                                                                                                           |                                                                                                                        |                                                                                                                        |                                                                                                                        |                                                                                                                          |                                                                                                                           |                                                                                                                           |                                                                                                                          |            |                                                                                                                          |                                                                                                                          |                                                                                                                        |                                                                                                                           |                                                                                                                        |                                                                                                                          |                                                                                                                           |                                                                                                                           |                                                                                                                        |          |                                                                                                                          |                                                                                                                          |                                                                                                                        |                                                                                                                           |                                                                                                                        |                                                                                                                          |                                                                                                                           |                                                                                                                        |                                                                                                                          |         |                                                                                                                          |                                                                                                                          |                                                                                                                        |                                                                                                                          |                                                                                                                        |                                                                                                                          |                                                                                                                           |                                                                                                                          |                                                                                                                        |          |                                                                                                                          |                                                                                                                        |                                                                                                                        |                                                                                                                        |                                                                                                                        |                                                                                                                          |                                                                                                                           |                                                                                                                           |                                                                                                                          |           |                                                                                                                          |                                                                                                                          |                                                                                                                        |                                                                                                                        |                                                                                                                        |                                                                                                                          |                                                                                                                          |                                                                                                                           |                                                                                                                        |      |                                                                                                                          |                                                                                                                           |                                                                                                                        |                                                                                                                        |                                                                                                                        |                                                                                                                          |                                                                                                                           |                                                                                                                           |                                                                                                                        |         |                                                                                                                          |                                                                                                                          |                                                                                                                        |                                                                                                                        |                                                                                                                        |                                                                                                                          |                                                                                                                           |                                                                                                                          |                                                                                                                          |          |                                                                                                                          |                                                                                                                           |                                                                                                                        |                                                                                                                        |                                                                                                                        |                                                                                                                          |                                                                                                                          |                                                                                                                        |                                                                                                                        |        |                                                                                                                           |                                                                                                                           |                                                                                                                        |                                                                                                                          |                                                                                                                        |                                                                                                                          |                                                                                                                           |                                                                                                                          |                                                                                                                          |     |                                                                                                                          |                                                                                                                           |                                                                                                                        |                                                                                                                           |                                                                                                                        |                                                                                                                          |                                                                                                                           |                                                                                                                           |                                                                                                                        |          |                                                                                                                          |                                                                                                                           |                                                                                                                        |                                                                                                                        |                                                                                                                        |                                                                                                                          |                                                                                                                           |                                                                                                                          |                                                                                                                        |
| Yamamoto   | <span style="background-color: green; color: white; border: 1px solid black; border-radius: 50%; padding: 2px;">+</span>  | <span style="background-color: yellow; color: black; border: 1px solid black; border-radius: 50%; padding: 2px;">?</span>                                                                                                                                                                                                                                                                                                                                                                                                                                                                                                                                                                                                                                                                                                                                                                                                                                                                                                                                                                                                                                                                                                                                                                                                                                                                                                                                                                                                                                                                                                                                                                                                                                                                                                                                                                                                                                                                                                                                                                                                                                                                                                                                                                                                                                                                                                                                                                                                                                                                                                                                                                                                                                                                                                                                                                                                                                                                                                                                                                                                                                                                                                                                                                                                                                                                                                                                                                                                                                                                                                                                                                                                                                                                                                                                                                                                                                                                                                                                                                                                                                                                                                                                                                                                                                                                                                                                                                                                                                                                                                                                                                                                                                                                                                                                                                                                                                                                                                                                                                                                                                                                                                                                                                                                                                                                                                                                                                                                                                                                                                                                                                                                                                                                                                                                                                                                                                                                                                                                                                                                                                                                                                                                                                                                                                                                                                                                                                                                                                                                                                                                                                                                                                                                                                                                                                                                                                                                                                                                                                                                                                                                                                                                                                                                                                                                                                                                                                                                                                                                                                                                                                                                                                                                                                                                                                                                                                                                                                                                                                                                                                                                                                                                                                                                                                                                                                                                                                                                                                                                                                                                                                                                                                                                                                                                                                                                                                                                                                                                                                                                                                                                                                                                                                                                                                                                                                                                                                                                                                                                                                                                                                                                                                                                                                                                                                                                                                                                                                                                                                                                                                                                                                                                                                                                                                                                                                                                                                                                                                                                                                                                                                                                                                                                                                                                                                                                                                                                                                                                                                                                                                                                                                                                                                                                                                                                                                                                                                                                                                                                                                                                                                                                                                                                                                                                                                                                                                                                                                                                                                                                                                                                                                                                                                                                                                                                                                                                                                                                                                                                                                                                                                                                                                                                                                                                                                                                                                                                                                                                                                                                                                                                                                                                                                                                                                                                                                                                                                                                                                                                                                                                                                                                                                                                                                                                                                                                                                                                                                                                                                                                                                                                                                                                                                                                                                                                                                                                                                                                                                                                                                                                                                                                                                                                                                                                                                                                                                                                                                                                                                                                                                                                                                                                                                                                                                                                                                                                                                                                                                                                                                                                                                                                                                                                                                                                                                                                                                                                                                                                                                                                                                                                                                                                                                             | <span style="background-color: red; color: white; border: 1px solid black; border-radius: 50%; padding: 2px;">-</span>    | <span style="background-color: red; color: white; border: 1px solid black; border-radius: 50%; padding: 2px;">-</span>    | <span style="background-color: red; color: white; border: 1px solid black; border-radius: 50%; padding: 2px;">-</span>    | <span style="background-color: green; color: white; border: 1px solid black; border-radius: 50%; padding: 2px;">+</span>  | <span style="background-color: yellow; color: black; border: 1px solid black; border-radius: 50%; padding: 2px;">?</span> | <span style="background-color: green; color: white; border: 1px solid black; border-radius: 50%; padding: 2px;">+</span>  | <span style="background-color: red; color: white; border: 1px solid black; border-radius: 50%; padding: 2px;">-</span>   |                                                                                                                          |                                                                                                                          |                                                                                                                          |        |                                                                                                                          |                                                                                                                           |                                                                                                                        |                                                                                                                        |                                                                                                                        |                                                                                                                          |                                                                                                                           |                                                                                                                           |                                                                                                                          |            |                                                                                                                          |                                                                                                                          |                                                                                                                        |                                                                                                                           |                                                                                                                        |                                                                                                                          |                                                                                                                           |                                                                                                                           |                                                                                                                        |          |                                                                                                                          |                                                                                                                          |                                                                                                                        |                                                                                                                           |                                                                                                                        |                                                                                                                          |                                                                                                                           |                                                                                                                        |                                                                                                                          |         |                                                                                                                          |                                                                                                                          |                                                                                                                        |                                                                                                                          |                                                                                                                        |                                                                                                                          |                                                                                                                           |                                                                                                                          |                                                                                                                        |          |                                                                                                                          |                                                                                                                        |                                                                                                                        |                                                                                                                        |                                                                                                                        |                                                                                                                          |                                                                                                                           |                                                                                                                           |                                                                                                                          |           |                                                                                                                          |                                                                                                                          |                                                                                                                        |                                                                                                                        |                                                                                                                        |                                                                                                                          |                                                                                                                          |                                                                                                                           |                                                                                                                        |      |                                                                                                                          |                                                                                                                           |                                                                                                                        |                                                                                                                        |                                                                                                                        |                                                                                                                          |                                                                                                                           |                                                                                                                           |                                                                                                                        |         |                                                                                                                          |                                                                                                                          |                                                                                                                        |                                                                                                                        |                                                                                                                        |                                                                                                                          |                                                                                                                           |                                                                                                                          |                                                                                                                          |          |                                                                                                                          |                                                                                                                           |                                                                                                                        |                                                                                                                        |                                                                                                                        |                                                                                                                          |                                                                                                                          |                                                                                                                        |                                                                                                                        |        |                                                                                                                           |                                                                                                                           |                                                                                                                        |                                                                                                                          |                                                                                                                        |                                                                                                                          |                                                                                                                           |                                                                                                                          |                                                                                                                          |     |                                                                                                                          |                                                                                                                           |                                                                                                                        |                                                                                                                           |                                                                                                                        |                                                                                                                          |                                                                                                                           |                                                                                                                           |                                                                                                                        |          |                                                                                                                          |                                                                                                                           |                                                                                                                        |                                                                                                                        |                                                                                                                        |                                                                                                                          |                                                                                                                           |                                                                                                                          |                                                                                                                        |

|               |          |                                                                                                                                                                                                                                                                                                                                                                                                                                                                                                                                                                                                                                                                                                                                                                                                                                                                                                                                                                                                                                                                                                                                                 |               |   |   |   |   |   |   |   |   |   |          |   |   |   |   |   |   |   |   |   |            |   |   |   |   |   |   |   |   |   |       |   |   |   |   |   |   |   |   |   |         |   |   |   |   |   |   |   |   |   |            |   |   |   |   |   |   |   |   |   |       |   |   |   |   |   |   |   |   |   |           |   |   |   |   |   |   |   |   |   |               |   |   |   |   |   |   |   |   |   |
|---------------|----------|-------------------------------------------------------------------------------------------------------------------------------------------------------------------------------------------------------------------------------------------------------------------------------------------------------------------------------------------------------------------------------------------------------------------------------------------------------------------------------------------------------------------------------------------------------------------------------------------------------------------------------------------------------------------------------------------------------------------------------------------------------------------------------------------------------------------------------------------------------------------------------------------------------------------------------------------------------------------------------------------------------------------------------------------------------------------------------------------------------------------------------------------------|---------------|---|---|---|---|---|---|---|---|---|----------|---|---|---|---|---|---|---|---|---|------------|---|---|---|---|---|---|---|---|---|-------|---|---|---|---|---|---|---|---|---|---------|---|---|---|---|---|---|---|---|---|------------|---|---|---|---|---|---|---|---|---|-------|---|---|---|---|---|---|---|---|---|-----------|---|---|---|---|---|---|---|---|---|---------------|---|---|---|---|---|---|---|---|---|
|               |          | assigned therapy (placebo or active). After evaluating the therapy, all patients were asked if they were of the opinion that they had received an active or placebo treatment. As indicated below, blinding of the analyst was ascertained by assigning codes to data sets and by analyzing these sets in random blocks.                                                                                                                                                                                                                                                                                                                                                                                                                                                                                                                                                                                                                                                                                                                                                                                                                        |               |   |   |   |   |   |   |   |   |   |          |   |   |   |   |   |   |   |   |   |            |   |   |   |   |   |   |   |   |   |       |   |   |   |   |   |   |   |   |   |         |   |   |   |   |   |   |   |   |   |            |   |   |   |   |   |   |   |   |   |       |   |   |   |   |   |   |   |   |   |           |   |   |   |   |   |   |   |   |   |               |   |   |   |   |   |   |   |   |   |
| PICO 3        | [24-29]  | <table border="1"> <tr> <td>Barnes 2014</td> <td>+</td><td>?</td><td>?</td><td>+</td><td>?</td><td>+</td><td>-</td><td>-</td><td>-</td> </tr> <tr> <td>STAR</td> <td>+</td><td>?</td><td>-</td><td>?</td><td>-</td><td>+</td><td>-</td><td>+</td><td>+</td> </tr> <tr> <td>TESLA</td> <td>+</td><td>+</td><td>+</td><td>+</td><td>+</td><td>+</td><td>?</td><td>+</td><td>?</td> </tr> </table>                                                                                                                                                                                                                                                                                                                                                                                                                                                                                                                                                                                                                                                                                                                                                 | Barnes 2014   | + | ? | ? | + | ? | + | - | - | - | STAR     | + | ? | - | ? | - | + | - | + | + | TESLA      | + | + | + | + | + | + | ? | + | ? |       |   |   |   |   |   |   |   |   |   |         |   |   |   |   |   |   |   |   |   |            |   |   |   |   |   |   |   |   |   |       |   |   |   |   |   |   |   |   |   |           |   |   |   |   |   |   |   |   |   |               |   |   |   |   |   |   |   |   |   |
| Barnes 2014   | +        | ?                                                                                                                                                                                                                                                                                                                                                                                                                                                                                                                                                                                                                                                                                                                                                                                                                                                                                                                                                                                                                                                                                                                                               | ?             | + | ? | + | - | - | - |   |   |   |          |   |   |   |   |   |   |   |   |   |            |   |   |   |   |   |   |   |   |   |       |   |   |   |   |   |   |   |   |   |         |   |   |   |   |   |   |   |   |   |            |   |   |   |   |   |   |   |   |   |       |   |   |   |   |   |   |   |   |   |           |   |   |   |   |   |   |   |   |   |               |   |   |   |   |   |   |   |   |   |
| STAR          | +        | ?                                                                                                                                                                                                                                                                                                                                                                                                                                                                                                                                                                                                                                                                                                                                                                                                                                                                                                                                                                                                                                                                                                                                               | -             | ? | - | + | - | + | + |   |   |   |          |   |   |   |   |   |   |   |   |   |            |   |   |   |   |   |   |   |   |   |       |   |   |   |   |   |   |   |   |   |         |   |   |   |   |   |   |   |   |   |            |   |   |   |   |   |   |   |   |   |       |   |   |   |   |   |   |   |   |   |           |   |   |   |   |   |   |   |   |   |               |   |   |   |   |   |   |   |   |   |
| TESLA         | +        | +                                                                                                                                                                                                                                                                                                                                                                                                                                                                                                                                                                                                                                                                                                                                                                                                                                                                                                                                                                                                                                                                                                                                               | +             | + | + | + | ? | + | ? |   |   |   |          |   |   |   |   |   |   |   |   |   |            |   |   |   |   |   |   |   |   |   |       |   |   |   |   |   |   |   |   |   |         |   |   |   |   |   |   |   |   |   |            |   |   |   |   |   |   |   |   |   |       |   |   |   |   |   |   |   |   |   |           |   |   |   |   |   |   |   |   |   |               |   |   |   |   |   |   |   |   |   |
| PICO 4        | [30-39]  | <table border="1"> <tr> <td>Atilgan</td> <td>+</td><td>?</td><td>?</td><td>?</td><td>?</td><td>?</td><td>+</td><td>?</td><td>+</td> </tr> <tr> <td>Diaferia</td> <td>+</td><td>?</td><td>+</td><td>-</td><td>+</td><td>+</td><td>?</td><td>+</td><td>+</td> </tr> <tr> <td>Guimaraes</td> <td>+</td><td>?</td><td>+</td><td>-</td><td>+</td><td>+</td><td>-</td><td>+</td><td>+</td> </tr> <tr> <td>Ieto</td> <td>+</td><td>?</td><td>+</td><td>-</td><td>+</td><td>+</td><td>+</td><td>?</td><td>+</td> </tr> <tr> <td>Lin</td> <td>+</td><td>?</td><td>+</td><td>?</td><td>+</td><td>+</td><td>+</td><td>?</td><td>+</td> </tr> <tr> <td>Neumannova</td> <td>+</td><td>?</td><td>-</td><td>-</td><td>-</td><td>+</td><td>-</td><td>?</td><td>+</td> </tr> <tr> <td>Puhan</td> <td>+</td><td>+</td><td>?</td><td>-</td><td>?</td><td>+</td><td>+</td><td>+</td><td>+</td> </tr> <tr> <td>Randerath</td> <td>+</td><td>+</td><td>+</td><td>+</td><td>+</td><td>+</td><td>?</td><td>?</td><td>+</td> </tr> <tr> <td>Torres-Castro</td> <td>+</td><td>?</td><td>?</td><td>+</td><td>?</td><td>+</td><td>?</td><td>+</td><td>+</td> </tr> </table> | Atilgan       | + | ? | ? | ? | ? | ? | + | ? | + | Diaferia | + | ? | + | - | + | + | ? | + | + | Guimaraes  | + | ? | + | - | + | + | - | + | + | Ieto  | + | ? | + | - | + | + | + | ? | + | Lin     | + | ? | + | ? | + | + | + | ? | + | Neumannova | + | ? | - | - | - | + | - | ? | + | Puhan | + | + | ? | - | ? | + | + | + | + | Randerath | + | + | + | + | + | + | ? | ? | + | Torres-Castro | + | ? | ? | + | ? | + | ? | + | + |
| Atilgan       | +        | ?                                                                                                                                                                                                                                                                                                                                                                                                                                                                                                                                                                                                                                                                                                                                                                                                                                                                                                                                                                                                                                                                                                                                               | ?             | ? | ? | ? | + | ? | + |   |   |   |          |   |   |   |   |   |   |   |   |   |            |   |   |   |   |   |   |   |   |   |       |   |   |   |   |   |   |   |   |   |         |   |   |   |   |   |   |   |   |   |            |   |   |   |   |   |   |   |   |   |       |   |   |   |   |   |   |   |   |   |           |   |   |   |   |   |   |   |   |   |               |   |   |   |   |   |   |   |   |   |
| Diaferia      | +        | ?                                                                                                                                                                                                                                                                                                                                                                                                                                                                                                                                                                                                                                                                                                                                                                                                                                                                                                                                                                                                                                                                                                                                               | +             | - | + | + | ? | + | + |   |   |   |          |   |   |   |   |   |   |   |   |   |            |   |   |   |   |   |   |   |   |   |       |   |   |   |   |   |   |   |   |   |         |   |   |   |   |   |   |   |   |   |            |   |   |   |   |   |   |   |   |   |       |   |   |   |   |   |   |   |   |   |           |   |   |   |   |   |   |   |   |   |               |   |   |   |   |   |   |   |   |   |
| Guimaraes     | +        | ?                                                                                                                                                                                                                                                                                                                                                                                                                                                                                                                                                                                                                                                                                                                                                                                                                                                                                                                                                                                                                                                                                                                                               | +             | - | + | + | - | + | + |   |   |   |          |   |   |   |   |   |   |   |   |   |            |   |   |   |   |   |   |   |   |   |       |   |   |   |   |   |   |   |   |   |         |   |   |   |   |   |   |   |   |   |            |   |   |   |   |   |   |   |   |   |       |   |   |   |   |   |   |   |   |   |           |   |   |   |   |   |   |   |   |   |               |   |   |   |   |   |   |   |   |   |
| Ieto          | +        | ?                                                                                                                                                                                                                                                                                                                                                                                                                                                                                                                                                                                                                                                                                                                                                                                                                                                                                                                                                                                                                                                                                                                                               | +             | - | + | + | + | ? | + |   |   |   |          |   |   |   |   |   |   |   |   |   |            |   |   |   |   |   |   |   |   |   |       |   |   |   |   |   |   |   |   |   |         |   |   |   |   |   |   |   |   |   |            |   |   |   |   |   |   |   |   |   |       |   |   |   |   |   |   |   |   |   |           |   |   |   |   |   |   |   |   |   |               |   |   |   |   |   |   |   |   |   |
| Lin           | +        | ?                                                                                                                                                                                                                                                                                                                                                                                                                                                                                                                                                                                                                                                                                                                                                                                                                                                                                                                                                                                                                                                                                                                                               | +             | ? | + | + | + | ? | + |   |   |   |          |   |   |   |   |   |   |   |   |   |            |   |   |   |   |   |   |   |   |   |       |   |   |   |   |   |   |   |   |   |         |   |   |   |   |   |   |   |   |   |            |   |   |   |   |   |   |   |   |   |       |   |   |   |   |   |   |   |   |   |           |   |   |   |   |   |   |   |   |   |               |   |   |   |   |   |   |   |   |   |
| Neumannova    | +        | ?                                                                                                                                                                                                                                                                                                                                                                                                                                                                                                                                                                                                                                                                                                                                                                                                                                                                                                                                                                                                                                                                                                                                               | -             | - | - | + | - | ? | + |   |   |   |          |   |   |   |   |   |   |   |   |   |            |   |   |   |   |   |   |   |   |   |       |   |   |   |   |   |   |   |   |   |         |   |   |   |   |   |   |   |   |   |            |   |   |   |   |   |   |   |   |   |       |   |   |   |   |   |   |   |   |   |           |   |   |   |   |   |   |   |   |   |               |   |   |   |   |   |   |   |   |   |
| Puhan         | +        | +                                                                                                                                                                                                                                                                                                                                                                                                                                                                                                                                                                                                                                                                                                                                                                                                                                                                                                                                                                                                                                                                                                                                               | ?             | - | ? | + | + | + | + |   |   |   |          |   |   |   |   |   |   |   |   |   |            |   |   |   |   |   |   |   |   |   |       |   |   |   |   |   |   |   |   |   |         |   |   |   |   |   |   |   |   |   |            |   |   |   |   |   |   |   |   |   |       |   |   |   |   |   |   |   |   |   |           |   |   |   |   |   |   |   |   |   |               |   |   |   |   |   |   |   |   |   |
| Randerath     | +        | +                                                                                                                                                                                                                                                                                                                                                                                                                                                                                                                                                                                                                                                                                                                                                                                                                                                                                                                                                                                                                                                                                                                                               | +             | + | + | + | ? | ? | + |   |   |   |          |   |   |   |   |   |   |   |   |   |            |   |   |   |   |   |   |   |   |   |       |   |   |   |   |   |   |   |   |   |         |   |   |   |   |   |   |   |   |   |            |   |   |   |   |   |   |   |   |   |       |   |   |   |   |   |   |   |   |   |           |   |   |   |   |   |   |   |   |   |               |   |   |   |   |   |   |   |   |   |
| Torres-Castro | +        | ?                                                                                                                                                                                                                                                                                                                                                                                                                                                                                                                                                                                                                                                                                                                                                                                                                                                                                                                                                                                                                                                                                                                                               | ?             | + | ? | + | ? | + | + |   |   |   |          |   |   |   |   |   |   |   |   |   |            |   |   |   |   |   |   |   |   |   |       |   |   |   |   |   |   |   |   |   |         |   |   |   |   |   |   |   |   |   |            |   |   |   |   |   |   |   |   |   |       |   |   |   |   |   |   |   |   |   |           |   |   |   |   |   |   |   |   |   |               |   |   |   |   |   |   |   |   |   |
| PICO 5        | [40, 41] | <table border="1"> <tr> <td><u>Vicini</u></td> <td>+</td><td>?</td><td>-</td><td>-</td><td>-</td><td>-</td><td>?</td><td>?</td><td>+</td> </tr> </table>                                                                                                                                                                                                                                                                                                                                                                                                                                                                                                                                                                                                                                                                                                                                                                                                                                                                                                                                                                                        | <u>Vicini</u> | + | ? | - | - | - | - | ? | ? | + |          |   |   |   |   |   |   |   |   |   |            |   |   |   |   |   |   |   |   |   |       |   |   |   |   |   |   |   |   |   |         |   |   |   |   |   |   |   |   |   |            |   |   |   |   |   |   |   |   |   |       |   |   |   |   |   |   |   |   |   |           |   |   |   |   |   |   |   |   |   |               |   |   |   |   |   |   |   |   |   |
| <u>Vicini</u> | +        | ?                                                                                                                                                                                                                                                                                                                                                                                                                                                                                                                                                                                                                                                                                                                                                                                                                                                                                                                                                                                                                                                                                                                                               | -             | - | - | - | ? | ? | + |   |   |   |          |   |   |   |   |   |   |   |   |   |            |   |   |   |   |   |   |   |   |   |       |   |   |   |   |   |   |   |   |   |         |   |   |   |   |   |   |   |   |   |            |   |   |   |   |   |   |   |   |   |       |   |   |   |   |   |   |   |   |   |           |   |   |   |   |   |   |   |   |   |               |   |   |   |   |   |   |   |   |   |
| PICO 6        | [42-48]  | <table border="1"> <tr> <td>Eskandari</td> <td>+</td><td>+</td><td>+</td><td>+</td><td>+</td><td>+</td><td>+</td><td>+</td><td>+</td> </tr> <tr> <td>Latshang</td> <td>+</td><td>+</td><td>+</td><td>+</td><td>+</td><td>+</td><td>+</td><td>+</td><td>-</td> </tr> <tr> <td>Nussbaumer</td> <td>+</td><td>?</td><td>+</td><td>+</td><td>+</td><td>+</td><td>+</td><td>+</td><td>-</td> </tr> <tr> <td>Whyte</td> <td>+</td><td>?</td><td>+</td><td>+</td><td>+</td><td>+</td><td>?</td><td>?</td><td>-</td> </tr> <tr> <td>Winslow</td> <td>+</td><td>?</td><td>+</td><td>+</td><td>+</td><td>+</td><td>+</td><td>+</td><td>+</td> </tr> </table>                                                                                                                                                                                                                                                                                                                                                                                                                                                                                              | Eskandari     | + | + | + | + | + | + | + | + | + | Latshang | + | + | + | + | + | + | + | + | - | Nussbaumer | + | ? | + | + | + | + | + | + | - | Whyte | + | ? | + | + | + | + | ? | ? | - | Winslow | + | ? | + | + | + | + | + | + | + |            |   |   |   |   |   |   |   |   |   |       |   |   |   |   |   |   |   |   |   |           |   |   |   |   |   |   |   |   |   |               |   |   |   |   |   |   |   |   |   |
| Eskandari     | +        | +                                                                                                                                                                                                                                                                                                                                                                                                                                                                                                                                                                                                                                                                                                                                                                                                                                                                                                                                                                                                                                                                                                                                               | +             | + | + | + | + | + | + |   |   |   |          |   |   |   |   |   |   |   |   |   |            |   |   |   |   |   |   |   |   |   |       |   |   |   |   |   |   |   |   |   |         |   |   |   |   |   |   |   |   |   |            |   |   |   |   |   |   |   |   |   |       |   |   |   |   |   |   |   |   |   |           |   |   |   |   |   |   |   |   |   |               |   |   |   |   |   |   |   |   |   |
| Latshang      | +        | +                                                                                                                                                                                                                                                                                                                                                                                                                                                                                                                                                                                                                                                                                                                                                                                                                                                                                                                                                                                                                                                                                                                                               | +             | + | + | + | + | + | - |   |   |   |          |   |   |   |   |   |   |   |   |   |            |   |   |   |   |   |   |   |   |   |       |   |   |   |   |   |   |   |   |   |         |   |   |   |   |   |   |   |   |   |            |   |   |   |   |   |   |   |   |   |       |   |   |   |   |   |   |   |   |   |           |   |   |   |   |   |   |   |   |   |               |   |   |   |   |   |   |   |   |   |
| Nussbaumer    | +        | ?                                                                                                                                                                                                                                                                                                                                                                                                                                                                                                                                                                                                                                                                                                                                                                                                                                                                                                                                                                                                                                                                                                                                               | +             | + | + | + | + | + | - |   |   |   |          |   |   |   |   |   |   |   |   |   |            |   |   |   |   |   |   |   |   |   |       |   |   |   |   |   |   |   |   |   |         |   |   |   |   |   |   |   |   |   |            |   |   |   |   |   |   |   |   |   |       |   |   |   |   |   |   |   |   |   |           |   |   |   |   |   |   |   |   |   |               |   |   |   |   |   |   |   |   |   |
| Whyte         | +        | ?                                                                                                                                                                                                                                                                                                                                                                                                                                                                                                                                                                                                                                                                                                                                                                                                                                                                                                                                                                                                                                                                                                                                               | +             | + | + | + | ? | ? | - |   |   |   |          |   |   |   |   |   |   |   |   |   |            |   |   |   |   |   |   |   |   |   |       |   |   |   |   |   |   |   |   |   |         |   |   |   |   |   |   |   |   |   |            |   |   |   |   |   |   |   |   |   |       |   |   |   |   |   |   |   |   |   |           |   |   |   |   |   |   |   |   |   |               |   |   |   |   |   |   |   |   |   |
| Winslow       | +        | ?                                                                                                                                                                                                                                                                                                                                                                                                                                                                                                                                                                                                                                                                                                                                                                                                                                                                                                                                                                                                                                                                                                                                               | +             | + | + | + | + | + | + |   |   |   |          |   |   |   |   |   |   |   |   |   |            |   |   |   |   |   |   |   |   |   |       |   |   |   |   |   |   |   |   |   |         |   |   |   |   |   |   |   |   |   |            |   |   |   |   |   |   |   |   |   |       |   |   |   |   |   |   |   |   |   |           |   |   |   |   |   |   |   |   |   |               |   |   |   |   |   |   |   |   |   |

|        |          |                                                                                                           |                                                                                                                                                                                                                                                                                                                                                                                                                                                                                                                                                                                                                                                                                                                                                                       |   |   |   |   |   |   |   |   |   |   |   |   |   |   |   |   |   |   |   |   |   |   |   |   |   |   |   |   |   |   |   |   |   |   |   |   |   |   |   |   |   |   |   |   |   |   |   |   |   |   |   |   |   |   |   |   |   |   |   |   |   |   |   |
|--------|----------|-----------------------------------------------------------------------------------------------------------|-----------------------------------------------------------------------------------------------------------------------------------------------------------------------------------------------------------------------------------------------------------------------------------------------------------------------------------------------------------------------------------------------------------------------------------------------------------------------------------------------------------------------------------------------------------------------------------------------------------------------------------------------------------------------------------------------------------------------------------------------------------------------|---|---|---|---|---|---|---|---|---|---|---|---|---|---|---|---|---|---|---|---|---|---|---|---|---|---|---|---|---|---|---|---|---|---|---|---|---|---|---|---|---|---|---|---|---|---|---|---|---|---|---|---|---|---|---|---|---|---|---|---|---|---|---|
| PICO 7 | [49-55]  | Berry<br><del>Jokic</del><br>Mok<br><del>Permut</del><br>Skinner 2008<br>Skinner 2004 a<br>Skinner 2004 b | <table border="1"> <tr> <td>+</td><td>?</td><td>-</td><td>-</td><td>-</td><td>+</td><td>+</td><td>+</td><td>+</td> </tr> <tr> <td>+</td><td>?</td><td>-</td><td>-</td><td>-</td><td>+</td><td>+</td><td>?</td><td>+</td> </tr> <tr> <td>?</td><td>?</td><td>-</td><td>+</td><td>?</td><td>+</td><td>+</td><td>+</td><td>+</td> </tr> <tr> <td>+</td><td>?</td><td>-</td><td>-</td><td>-</td><td>+</td><td>?</td><td>?</td><td>?</td> </tr> <tr> <td>+</td><td>?</td><td>-</td><td>-</td><td>-</td><td>?</td><td>?</td><td>?</td><td>?</td> </tr> <tr> <td>+</td><td>?</td><td>-</td><td>-</td><td>-</td><td>+</td><td>+</td><td>?</td><td>-</td> </tr> <tr> <td>+</td><td>?</td><td>-</td><td>-</td><td>-</td><td>?</td><td>+</td><td>?</td><td>-</td> </tr> </table> | + | ? | - | - | - | + | + | + | + | + | ? | - | - | - | + | + | ? | + | ? | ? | - | + | ? | + | + | + | + | + | ? | - | - | - | + | ? | ? | ? | + | ? | - | - | - | ? | ? | ? | ? | + | ? | - | - | - | + | + | ? | - | + | ? | - | - | - | ? | + | ? | - |
| +      | ?        | -                                                                                                         | -                                                                                                                                                                                                                                                                                                                                                                                                                                                                                                                                                                                                                                                                                                                                                                     | - | + | + | + | + |   |   |   |   |   |   |   |   |   |   |   |   |   |   |   |   |   |   |   |   |   |   |   |   |   |   |   |   |   |   |   |   |   |   |   |   |   |   |   |   |   |   |   |   |   |   |   |   |   |   |   |   |   |   |   |   |   |   |
| +      | ?        | -                                                                                                         | -                                                                                                                                                                                                                                                                                                                                                                                                                                                                                                                                                                                                                                                                                                                                                                     | - | + | + | ? | + |   |   |   |   |   |   |   |   |   |   |   |   |   |   |   |   |   |   |   |   |   |   |   |   |   |   |   |   |   |   |   |   |   |   |   |   |   |   |   |   |   |   |   |   |   |   |   |   |   |   |   |   |   |   |   |   |   |   |
| ?      | ?        | -                                                                                                         | +                                                                                                                                                                                                                                                                                                                                                                                                                                                                                                                                                                                                                                                                                                                                                                     | ? | + | + | + | + |   |   |   |   |   |   |   |   |   |   |   |   |   |   |   |   |   |   |   |   |   |   |   |   |   |   |   |   |   |   |   |   |   |   |   |   |   |   |   |   |   |   |   |   |   |   |   |   |   |   |   |   |   |   |   |   |   |   |
| +      | ?        | -                                                                                                         | -                                                                                                                                                                                                                                                                                                                                                                                                                                                                                                                                                                                                                                                                                                                                                                     | - | + | ? | ? | ? |   |   |   |   |   |   |   |   |   |   |   |   |   |   |   |   |   |   |   |   |   |   |   |   |   |   |   |   |   |   |   |   |   |   |   |   |   |   |   |   |   |   |   |   |   |   |   |   |   |   |   |   |   |   |   |   |   |   |
| +      | ?        | -                                                                                                         | -                                                                                                                                                                                                                                                                                                                                                                                                                                                                                                                                                                                                                                                                                                                                                                     | - | ? | ? | ? | ? |   |   |   |   |   |   |   |   |   |   |   |   |   |   |   |   |   |   |   |   |   |   |   |   |   |   |   |   |   |   |   |   |   |   |   |   |   |   |   |   |   |   |   |   |   |   |   |   |   |   |   |   |   |   |   |   |   |   |
| +      | ?        | -                                                                                                         | -                                                                                                                                                                                                                                                                                                                                                                                                                                                                                                                                                                                                                                                                                                                                                                     | - | + | + | ? | - |   |   |   |   |   |   |   |   |   |   |   |   |   |   |   |   |   |   |   |   |   |   |   |   |   |   |   |   |   |   |   |   |   |   |   |   |   |   |   |   |   |   |   |   |   |   |   |   |   |   |   |   |   |   |   |   |   |   |
| +      | ?        | -                                                                                                         | -                                                                                                                                                                                                                                                                                                                                                                                                                                                                                                                                                                                                                                                                                                                                                                     | - | ? | + | ? | - |   |   |   |   |   |   |   |   |   |   |   |   |   |   |   |   |   |   |   |   |   |   |   |   |   |   |   |   |   |   |   |   |   |   |   |   |   |   |   |   |   |   |   |   |   |   |   |   |   |   |   |   |   |   |   |   |   |   |
| PICO 8 | [56, 57] | De Ruiters                                                                                                | <table border="1"> <tr> <td>+</td><td>+</td><td>-</td><td>-</td><td>-</td><td>+</td><td>+</td><td>+</td><td>+</td> </tr> </table>                                                                                                                                                                                                                                                                                                                                                                                                                                                                                                                                                                                                                                     | + | + | - | - | - | + | + | + | + |   |   |   |   |   |   |   |   |   |   |   |   |   |   |   |   |   |   |   |   |   |   |   |   |   |   |   |   |   |   |   |   |   |   |   |   |   |   |   |   |   |   |   |   |   |   |   |   |   |   |   |   |   |   |
| +      | +        | -                                                                                                         | -                                                                                                                                                                                                                                                                                                                                                                                                                                                                                                                                                                                                                                                                                                                                                                     | - | + | + | + | + |   |   |   |   |   |   |   |   |   |   |   |   |   |   |   |   |   |   |   |   |   |   |   |   |   |   |   |   |   |   |   |   |   |   |   |   |   |   |   |   |   |   |   |   |   |   |   |   |   |   |   |   |   |   |   |   |   |   |

|           |   |   |   |   |   |   |   |   |   |
|-----------|---|---|---|---|---|---|---|---|---|
| Skinner 1 | + | ? | - | - | - | + | + | ? | - |
| Skinner 3 | + | ? | - | - | - | ? | + | ? | - |

Figure e9: PICO 2 – Meta-Analyses

AHI

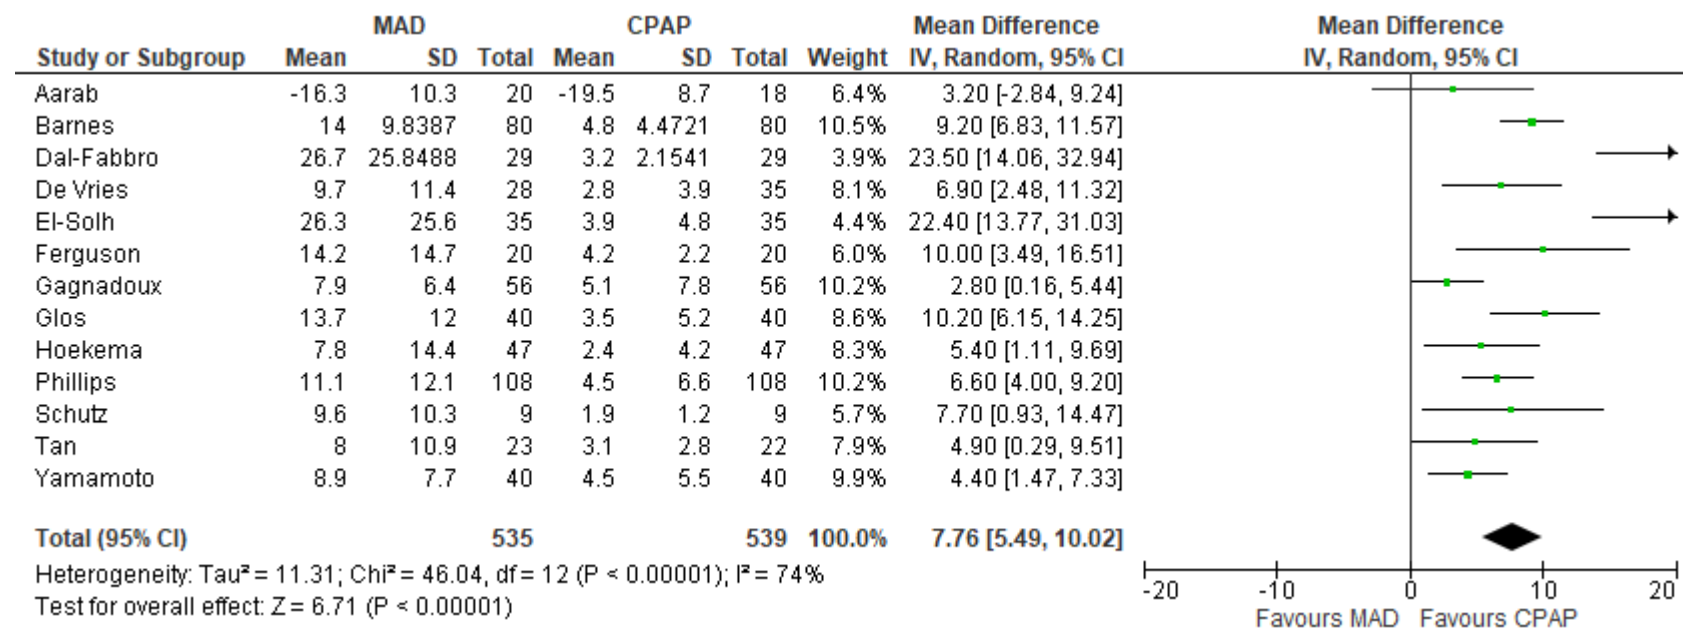



## Sleep efficiency

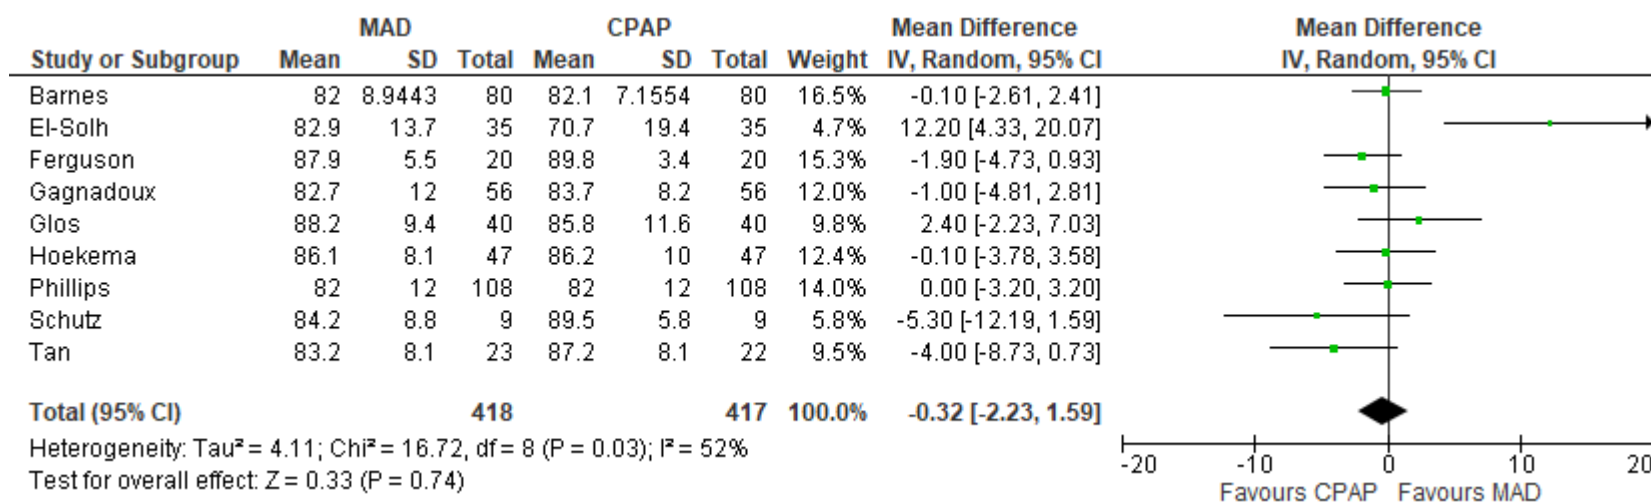

# ESS

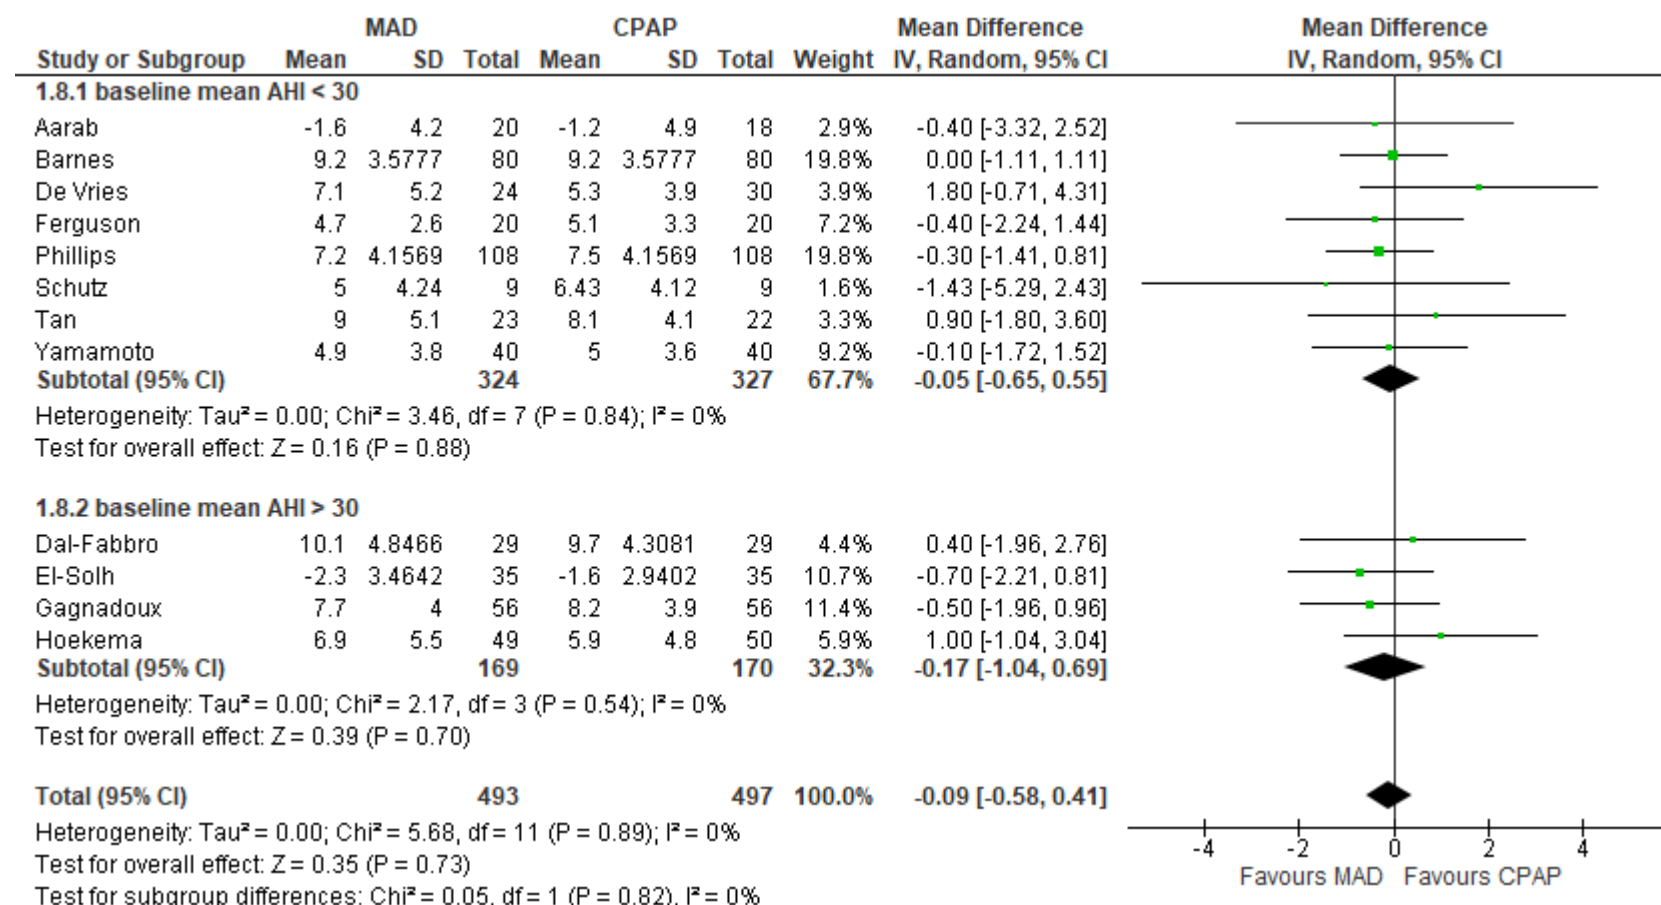

## SF36 physical functioning

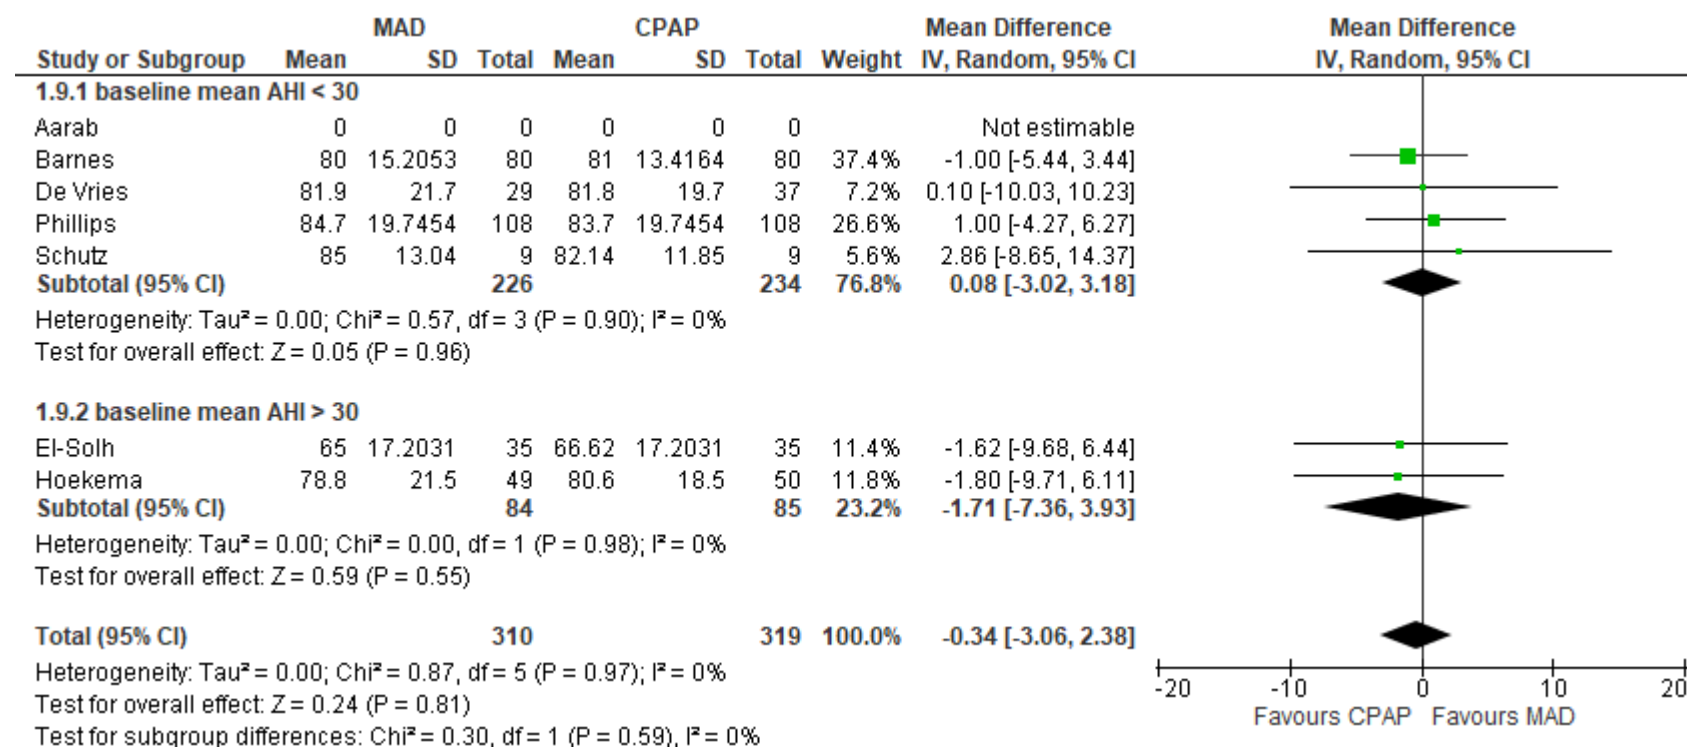

Figure e10: PICO 4 a and b – Meta-Analyses

AHI

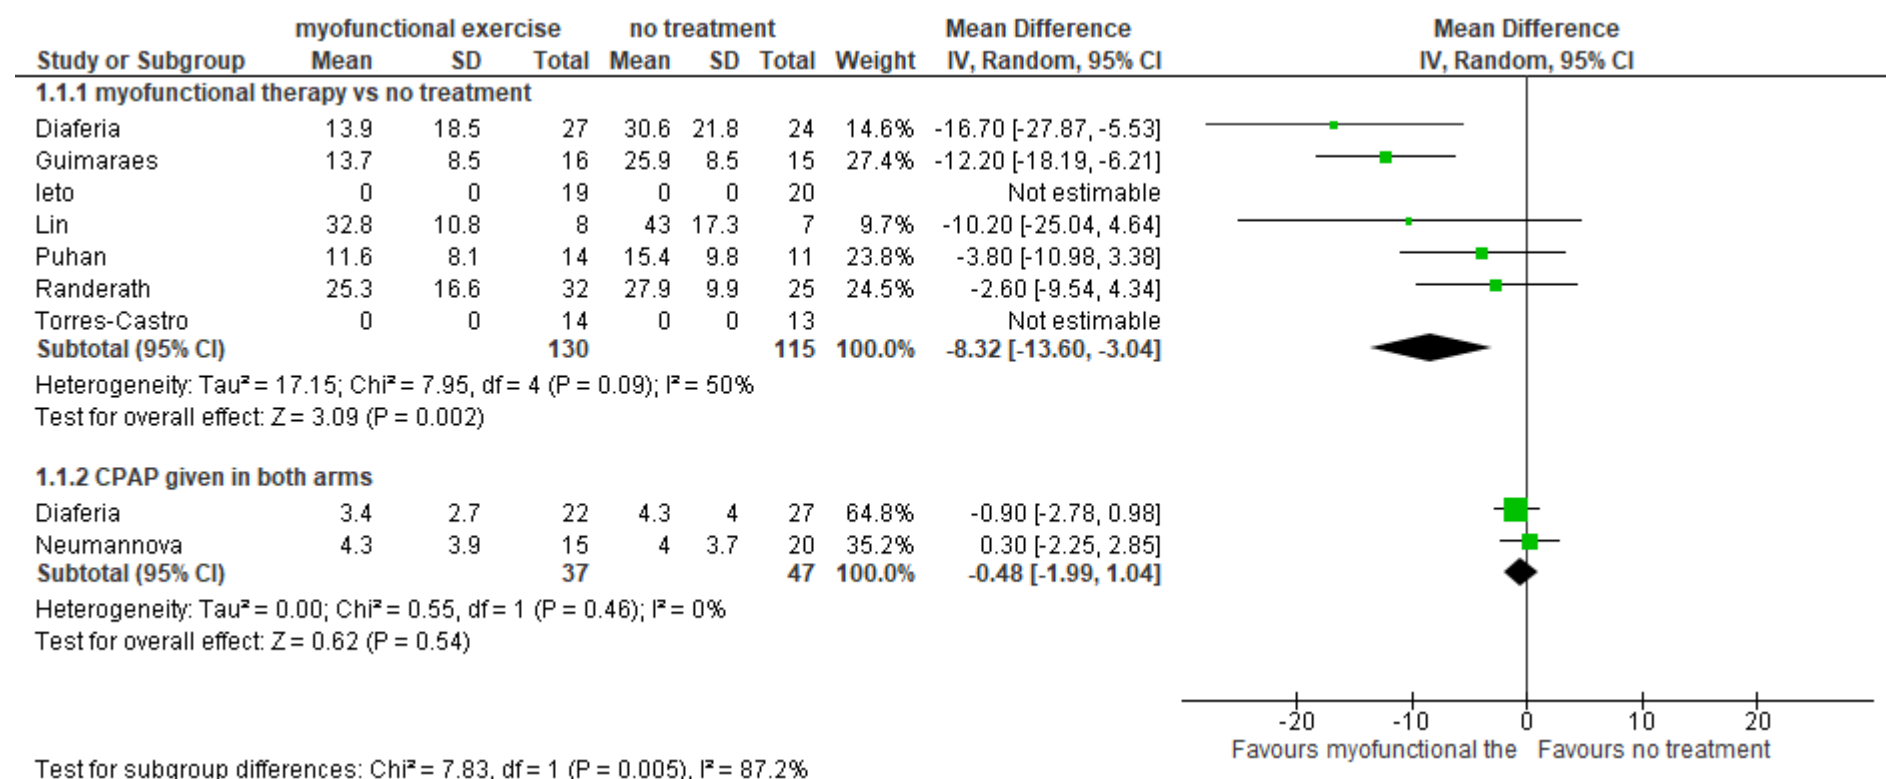

## Sleep efficiency

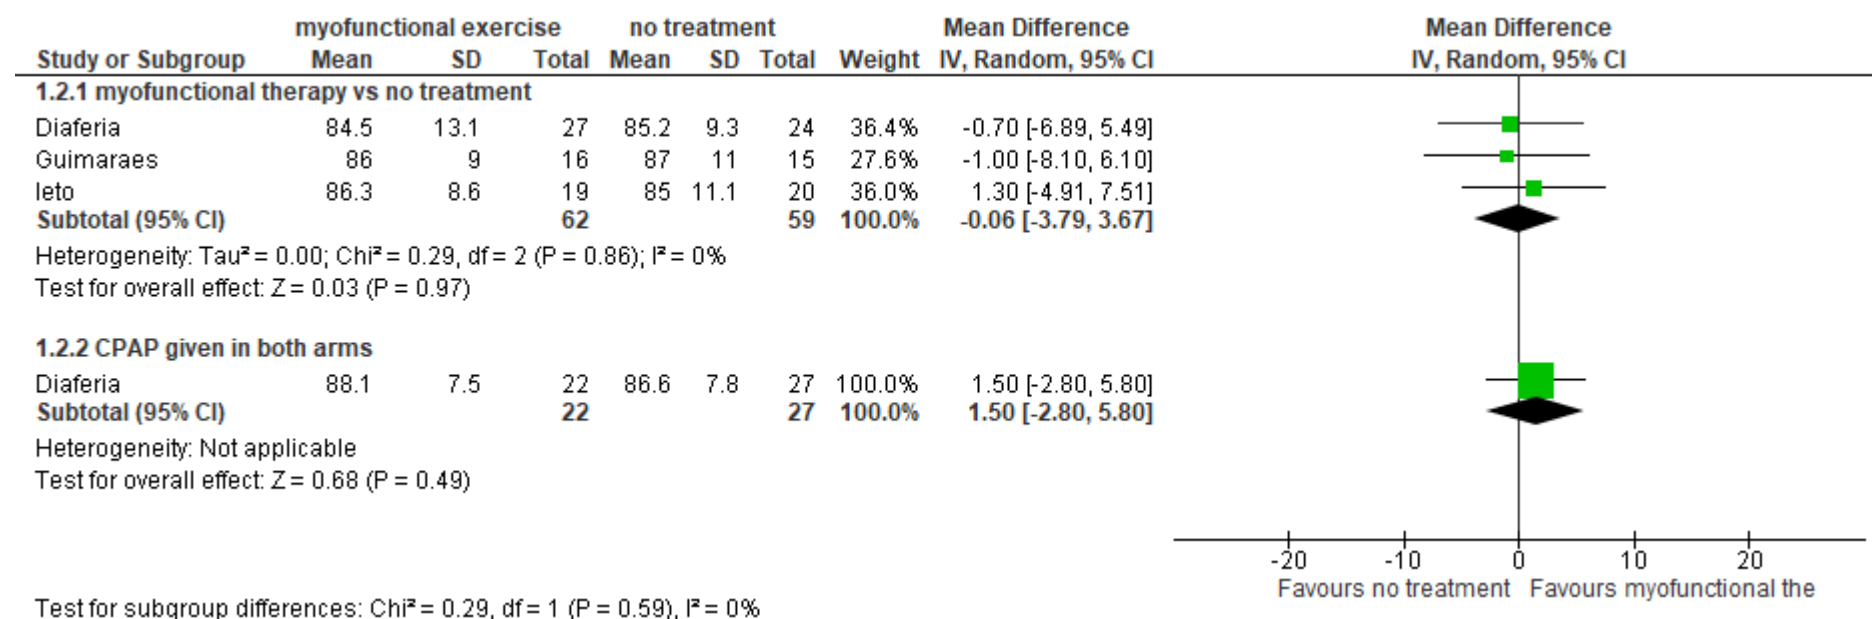

## Sleepiness ESS

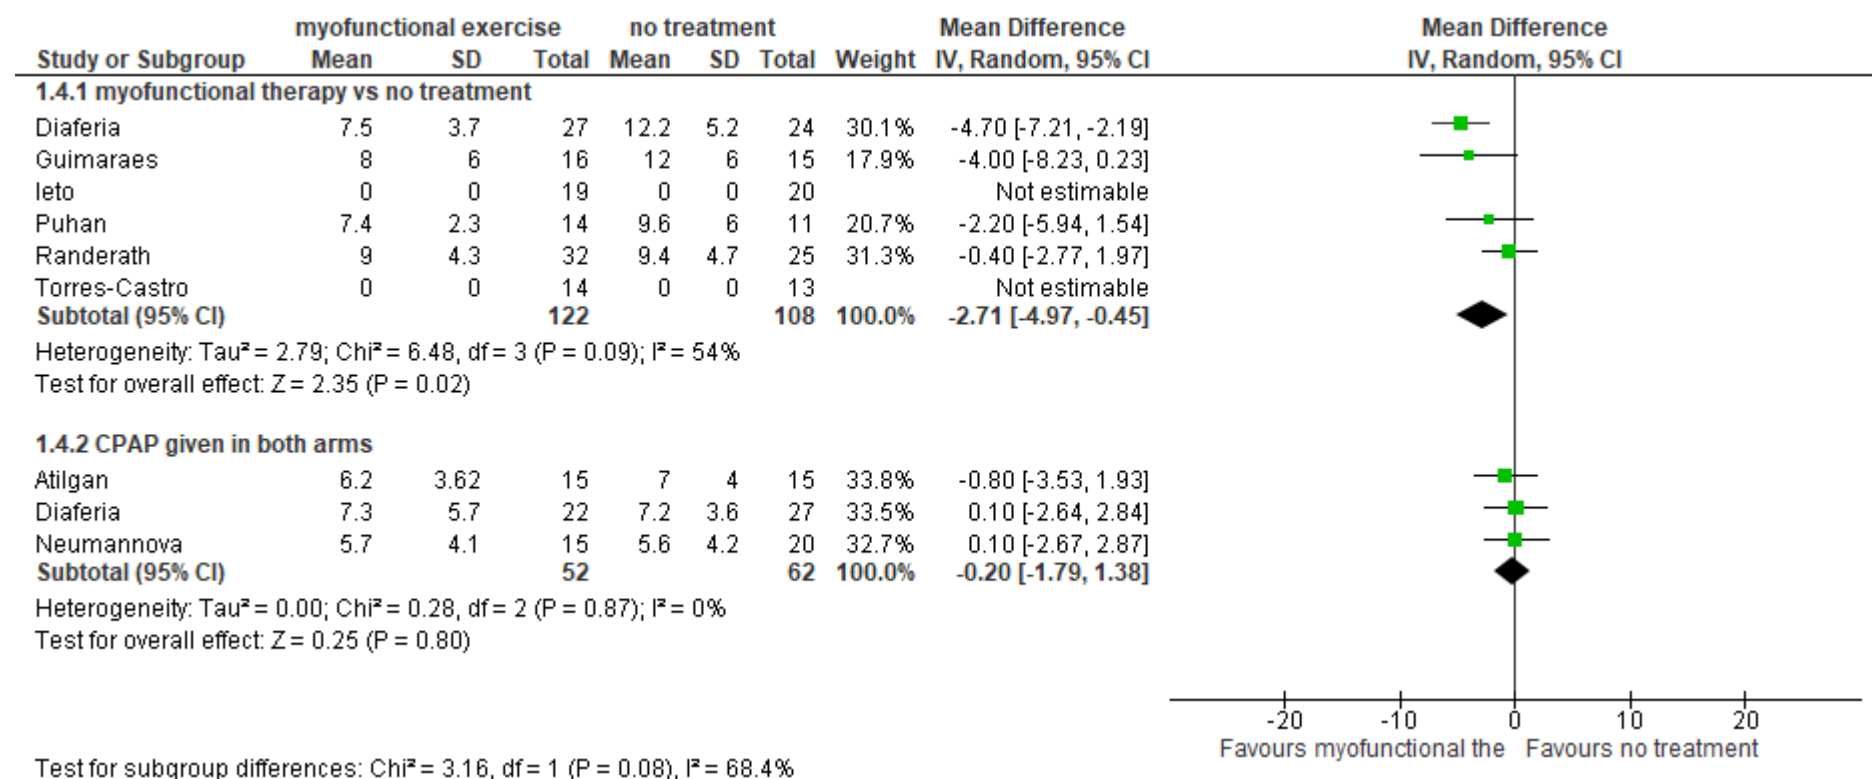

## Sleep quality Pittsburgh

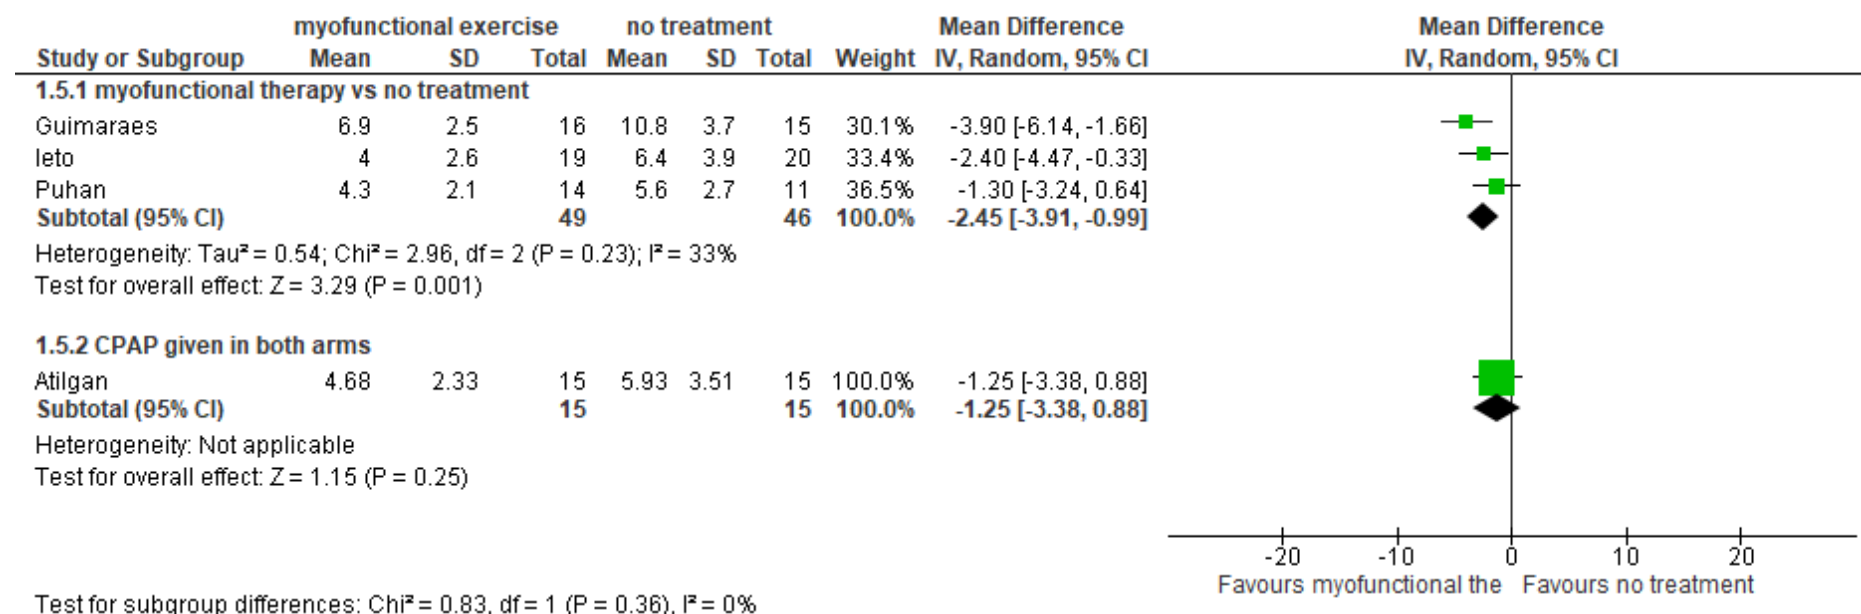

## Figure e11: PICO 6 – Meta-Analyses

AHI

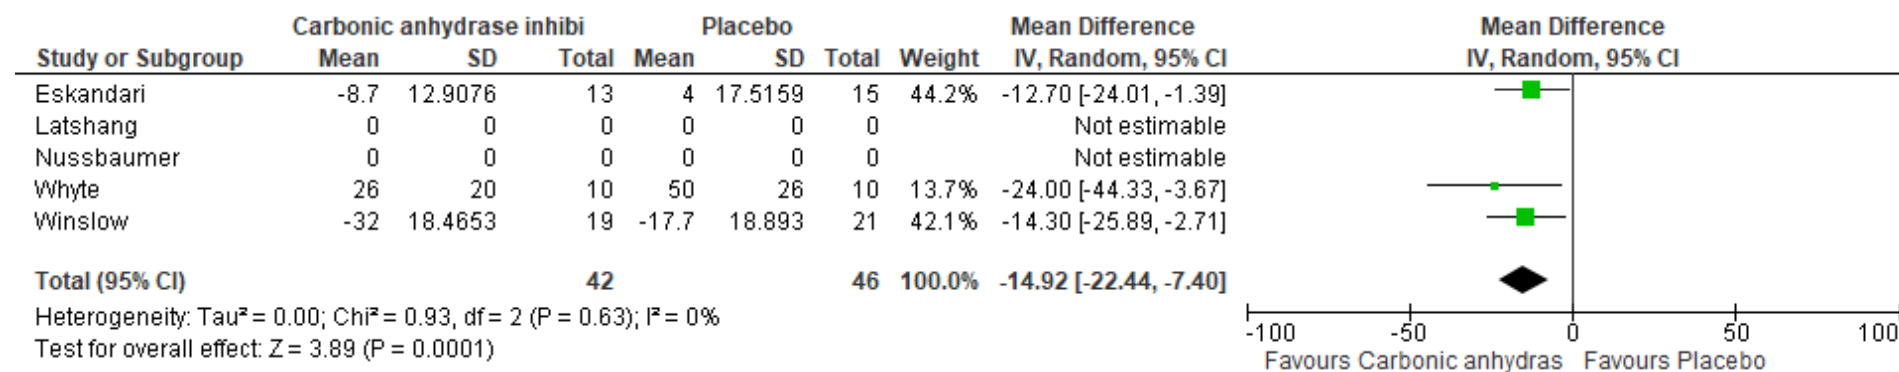

Sleepiness (ESS)

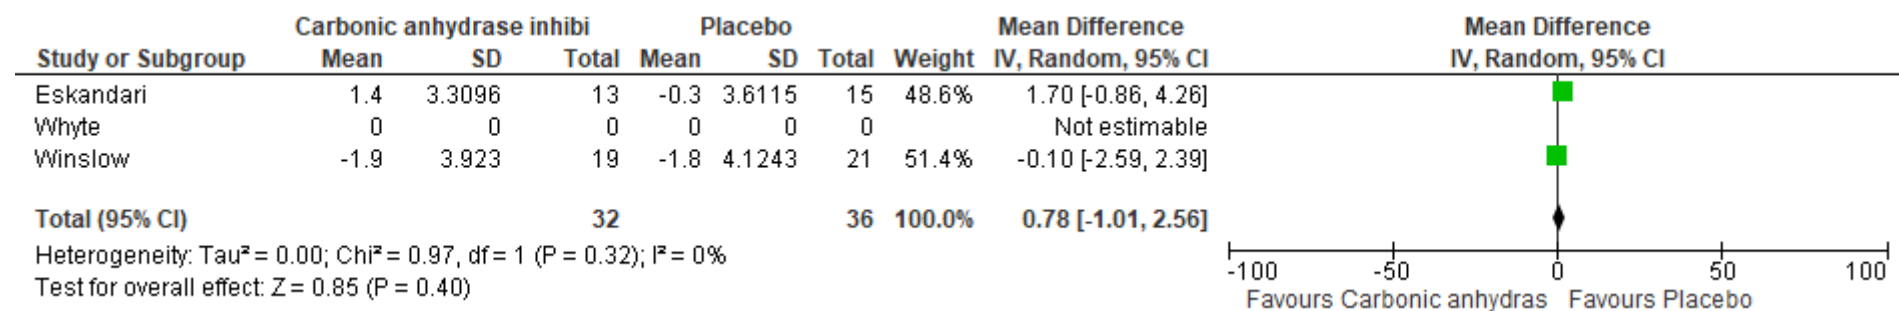



Figure e12: PICO 7 – Meta-Analyses

AHI

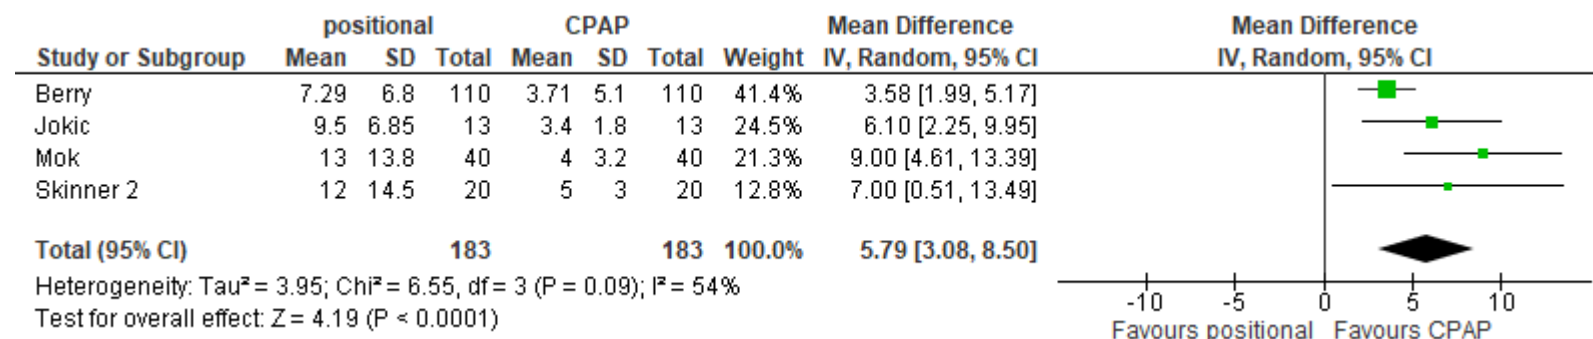

SF-36 physical functioning

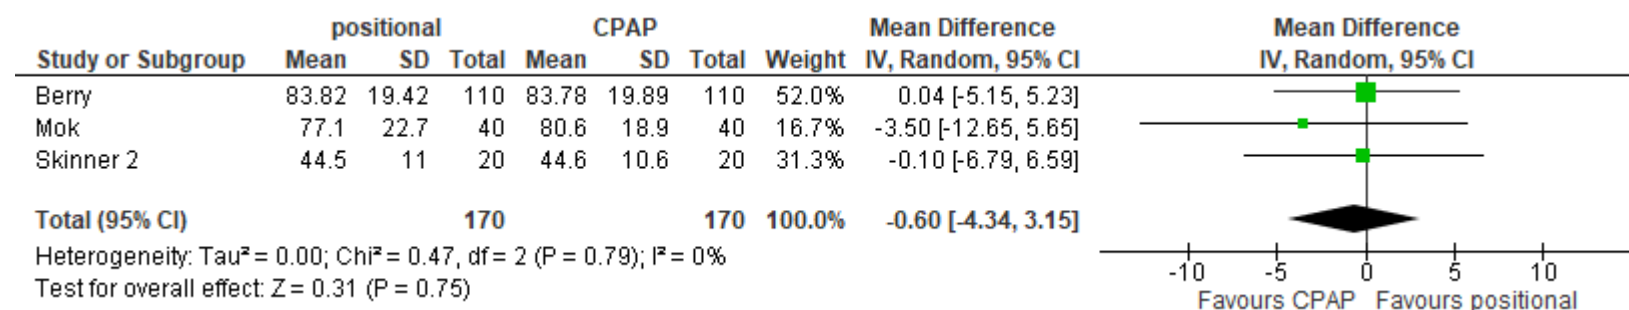

## Sleep efficiency

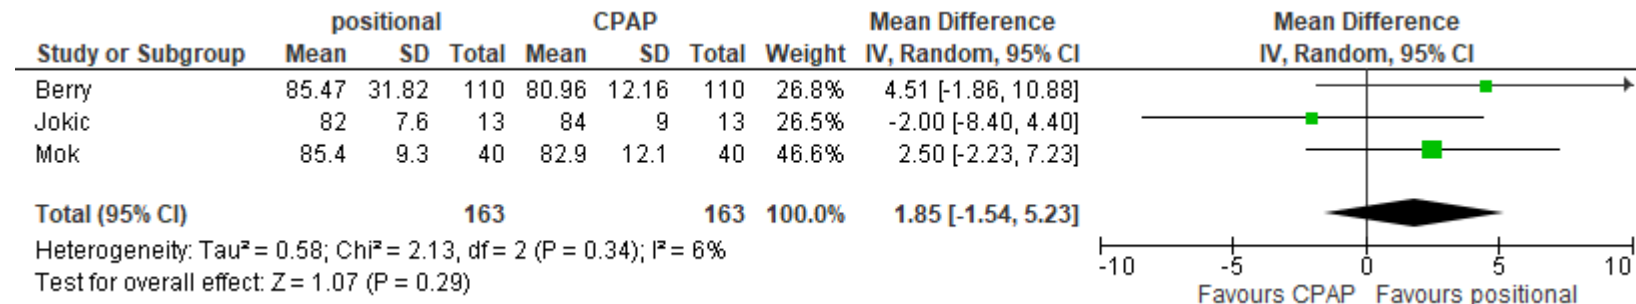

## Sleepiness (ESS)

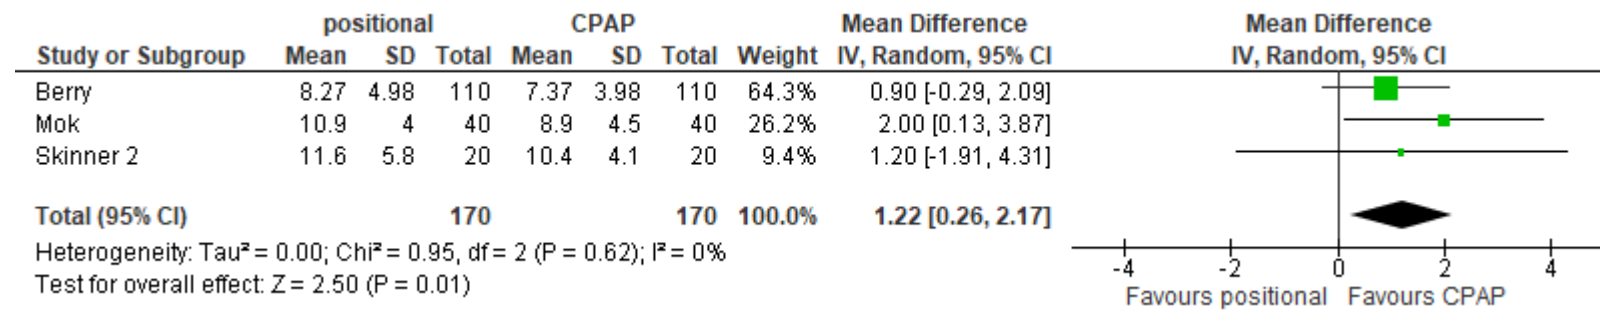

**Table e1: Meetings of the ERS Non-CPAP therapies in obstructive sleep apnoea (2018-2020)**

|                    |                                | <b>Paris</b><br>17/08/2018<br>(kick-off<br>meeting) | <b>Düsseldorf</b><br>01/07/2019 | <b>Madrid</b><br>01/10/2019 | <b>Consensus<br/>meeting</b><br>23/11/2020<br>(virtual) |
|--------------------|--------------------------------|-----------------------------------------------------|---------------------------------|-----------------------------|---------------------------------------------------------|
| Winfried Randerath | Solingen<br>(Germany)          | Present                                             | Present                         | Present                     | Present                                                 |
| Johan Verbraecken  | Antwerp (Belgium)              | Present                                             | Present                         | Present                     | Present                                                 |
| Christel de Raaff  | Amsterdam (The<br>Netherlands) | Excused                                             | Excused                         | Present                     | Present                                                 |
| Nicole Skoetz      | (Cologne,<br>Germany)          | Excused                                             | Present                         | Present                     | Present                                                 |
| Tina Jacobs        | (Cologne,<br>Germany)          | Excused                                             | Excused                         | Present                     | Present                                                 |
| Rebecca Morgan     | (Hamilton,<br>Canada)          | N/A                                                 | Present                         | N/A                         | N/A                                                     |
| Simon Herkenrath   | (Solingen,<br>Germany)         | Present                                             | Present                         | Present                     | Present                                                 |
| Oreste Marrone     | (Palermo, Italy)               | Present                                             | Excused                         | Present                     | Present                                                 |
| Jean-Louis Pepin   | (Grenoble, France)             | Excused                                             | Present                         | Excused                     | Present                                                 |
| Jan Hedner         | (Gothenburg,<br>Sweden)        | Present                                             | Excused                         | Present                     | Present                                                 |

|                         |                              | <b>Paris</b><br>17/08/2018<br>(kick-off meeting) | <b>Düsseldorf</b><br>01/07/2019 | <b>Madrid</b><br>01/10/2019 | <b>Consensus meeting</b><br>23/11/2020<br>(virtual) |
|-------------------------|------------------------------|--------------------------------------------------|---------------------------------|-----------------------------|-----------------------------------------------------|
| Marie Marklund          | (Umea, Sweden)               | Present                                          | Excused                         | Excused                     | Present                                             |
| Walter McNicholas       | (Dublin, Ireland)            | Present                                          | Excused                         | Excused                     | Present                                             |
| Peter Wijkstra          | (Groningen, The Netherlands) | Excused                                          | Present                         | Present                     | Present                                             |
| Sofia Schiza            | (Heraklion, Greece)          | Present                                          | Present                         | Present                     | Present                                             |
| Wojciech Trzepizur      | (Anger, France)              | Present                                          | Present                         | Present                     | Excused                                             |
| Winfried Hohenhorst     | (Essen, Germany)             | Present                                          | Present                         | Present                     | Present                                             |
| Jörg Steier             | (London, UK)                 | Excused                                          | Excused                         | Excused                     | Present                                             |
| Dan Smyth               | (Sheffield, UK)              | Present                                          | Present                         | Excused                     | Excused                                             |
| Mark De Quidt           | (Sheffield, UK)              | Present                                          | Present                         | Present                     | Withdrawn                                           |
| Barbara Johnson         | (Sheffield, UK)              | Excused                                          | Excused                         | Present                     | N/A                                                 |
| Piet-Heijn van Mechelen | (Sheffield, UK)              | N/A                                              | N/A                             | N/A                         | Present                                             |
| Claire Williams         | (Sheffield, UK)              | N/A                                              | N/A                             | N/A                         | Present                                             |
| Tomy Tonia              | (Bern, Switzerland)          | Present                                          | Excused                         | Excused                     | Present                                             |

**Table e2: PICO questions**

| Number | Name                                                                                                                          | Population              | Intervention                                         | Comparison           | Outcome                                                                                                                          | Recommendation                                                                     |
|--------|-------------------------------------------------------------------------------------------------------------------------------|-------------------------|------------------------------------------------------|----------------------|----------------------------------------------------------------------------------------------------------------------------------|------------------------------------------------------------------------------------|
| 1      | In adult obese patients with OSA, should laparoscopic Roux-en-Y gastric bypass surgery (RYGB) or weight loss diet be used?    | Obese patients with OSA | Laparoscopic Roux-en-Y gastric bypass surgery (RYGB) | Weight reducing diet | AHI; sleep efficiency; health-related quality of life; sleepiness; hypertension; compliance; adverse events                      | Conditional recommendation for the intervention, very low quality of evidence      |
| 2      | Should custom-made dual-block mandibular advancement device or CPAP be used for adult patients with obstructive sleep apnoea? | Adult patients with OSA | Custom-made dual-block mandibular advancement device | CPAP                 | AHI; sleep efficiency; oxygen desaturation; sleepiness; physical functioning; arterial hypertension; compliance; adverse events. | Conditional recommendation against the intervention, very low quality of evidence  |
| 3      | Should hypoglossal nerve stimulation during sleep or no treatment be used for adult patients with obstructive sleep apnoea?   | Adult patients with OSA | Hypoglossal nerve stimulation                        | No treatment         | AHI; sleep efficiency; oxygen desaturation; sleepiness; physical functioning; arterial hypertension; compliance; adverse events. | Conditional recommendation against the intervention, very low quality of evidence. |

| Number | Name                                                                                                                | Population              | Intervention                  | Comparison   | Outcome                                                                                                    | Recommendation                                                                                         |
|--------|---------------------------------------------------------------------------------------------------------------------|-------------------------|-------------------------------|--------------|------------------------------------------------------------------------------------------------------------|--------------------------------------------------------------------------------------------------------|
| 4a     | In adult patients with OSA, should myofunctional therapy or no treatment be used?                                   | Adult patients with OSA | Myofunctional therapy         | No treatment | AHI; sleep efficiency; sleepiness; physical functioning; compliance; adverse events.                       | Conditional recommendation for either the intervention or the comparison, low quality of evidence      |
| 4b     | Should myofunctional therapy or CPAP be used for adult patients with obstructive sleep apnoea?                      | Adult patients with OSA | Myofunctional therapy         | CPAP         | AHI; sleep efficiency; sleepiness; physical functioning; compliance; adverse events.                       | Conditional recommendation against the intervention, low quality of evidence                           |
| 5      | Should maxillo-mandibular osteotomy or CPAP be used for adult patients with obstructive sleep apnoea?               | Adult patients with OSA | Maxillo-mandibular osteotomy  | CPAP         | AHI; sleepiness; satisfaction; adverse events.                                                             | Conditional recommendation for either the intervention or the comparison, very low quality of evidence |
| 6      | Should carbonic anhydrase inhibitors (compared to placebo) be used for adult patients with obstructive sleep apnoea | Adult patients with OSA | Carbonic anhydrase inhibitors | Placebo      | AHI; sleep efficiency; oxygen desaturation; sleepiness; arterial hypertension; compliance; adverse events. | Conditional recommendation for the intervention, low quality of evidence                               |

| Number | Name                                                                                                                                                                                     | Population                                                       | Intervention       | Comparison                                           | Outcome                                                                                                                                 | Recommendation                                                                                           |
|--------|------------------------------------------------------------------------------------------------------------------------------------------------------------------------------------------|------------------------------------------------------------------|--------------------|------------------------------------------------------|-----------------------------------------------------------------------------------------------------------------------------------------|----------------------------------------------------------------------------------------------------------|
| 7      | Should positional therapy or CPAP be used for adult patients with position-dependent obstructive sleep apnoea?                                                                           | Adult patients with position-dependent obstructive sleep apnoea. | Positional therapy | CPAP                                                 | AHI; sleep efficiency; oxygen desaturation; sleepiness; health-related quality of life; energy level scores; compliance; adverse events | Conditional recommendation for either the intervention or the comparison, very low certainty of evidence |
| 8      | Should positional therapy (intervention) or custom made dual-block mandibular advancement devices (control) be used for adult patients with position-dependent obstructive sleep apnoea? | Adult patients with position-dependent obstructive sleep apnoea. | Positional therapy | Custom-made dual-block mandibular advancement device | AHI; sleep efficiency; oxygen desaturation; sleepiness; arterial hypertension; adherence; adverse events; Quality of life.              | Conditional recommendation for either the intervention or the comparison, very low certainty of evidence |

### **Table e3: Reasons for the definition of the PICOs**

#### **PICO 1: In adult obese patients with OSA, should laparoscopic Roux-en-Y gastric bypass surgery (RYGB) or weight reducing diet be used?**

Obesity is the most important risk factor of OSA. Weight reducing has been discussed in the 2011 ERS statement and is an unequivocal part of OSA treatment. However, we asked for the relevance of bariatric surgery and decided to analyse the most frequently performed technique. The accepted weight reducing diet was chosen as a comparator as the standard treatment.

#### **PICO 2: Should a custom-made dual-block mandibular advancement device or CPAP be used for adult patients with obstructive sleep apnoea?**

Custom-made dual-block mandibular advancement device are the accepted standard of mandibular advancement technique. They have been mentioned in the 2011 ERS statement. There is an increasing interest in mandibular advancement leading to reimbursement in some health systems. The body of evidence is growing, asking for a renewed view on the comparison between custom-made dual-block mandibular advancement device and CPAP.

#### **PICO 3: Should hypoglossal nerve stimulation during sleep or no treatment be used for adult patients with obstructive sleep apnoea?**

Recent advances on the pathophysiology of OSA have shown the relevance of upper airway muscle responsiveness and activity. This stresses the question of direct or indirect stimulation of muscle activity. Hypoglossal nerve activity has raised growing interest due to the availability of devices and surgical techniques. Therefore, an independent evaluation of the scientific basis of the therapy seemed necessary. We chose “no treatment” as a comparator as the expert panel was –a priori- not aware of placebo-controlled or longer-term CPAP-controlled studies.

#### **PICO 4a: In adult patients with OSA, should myofunctional therapy or no treatment be used?**

#### **PICO 4b: Should myofunctional therapy or CPAP be used for adult patients with obstructive sleep apnoea?**



In addition to PICO 3, myofunctional therapies are discussed as approaches to improvement of muscle activity. These techniques do not require surgery or technical devices. Their efficacy was analysed alone (comparator “no treatment”) and in comparison to the gold standard CPAP. A placebo-control is not possible in these procedures, which cannot be blinded.

**PICO 5: Should maxillo-mandibular osteotomy or CPAP be used for adult patients with obstructive sleep apnoea?**

Maxillo-mandibular osteotomy represents an intervention at the facial skeleton, which is considered being the most effective surgical treatment of OSA. However, a re-evaluation of available data in comparison to the standard therapy of CPAP seemed timely to the panel.

**PICO 6: Should carbonic anhydrase inhibitors (compared to placebo) be used for adult patients with obstructive sleep apnoea?**

In general, drug therapy is a well-known and often preferred therapeutical option for patients and clinicians. Therefore, the panel intended to include pharmaceutical therapies in the guideline. According to the target of the guideline, we selected drugs intending to directly influence OSA. The evaluation of drugs (or other options) in pre-clinical stages or substances focussing on consequences such as residual sleepiness might be the target of future guidelines or statements. The comparator placebo seems adequate for pharmaceutical interventions.

**PICO 7: Should positional therapy or CPAP be used for adult patients with position-dependent obstructive sleep apnoea?**

Positional therapy has risen broad interest due to the development of new, more comfortable devices. However, there is a huge uncertainty on the efficacy of these approaches as compared to the gold standard CPAP.

**PICO 8: Should positional therapy (intervention) or custom made dual-block mandibular advancement devices (control) be used for adult patients with position-dependent obstructive sleep apnoea?**

In addition to PICO 7, positional therapy can be compared to other accepted therapeutical options, especially the custom-made dual-block mandibular

advancement devices. This analysis may also guide to future additional analyses to combined therapies.

**Table e4: Search strategies PICO 1**

Database(s): **Ovid MEDLINE(R) and Epub Ahead of Print, In-Process & Other Non-Indexed Citations, Daily and Versions(R)** 1946 to June 12, 2020

Search Strategy:

| #  | Searches                                                                  | Results | Annotations |
|----|---------------------------------------------------------------------------|---------|-------------|
| 1  | sleep apnoea syndromes/                                                   | 14597   |             |
| 2  | exp Sleep Apnoea, Obstructive/                                            | 20693   |             |
| 3  | ((apnoea* or apnoea*) adj3 sleep*).tw,kf,ot.                              | 37738   |             |
| 4  | (hypopnoea* or hypopnoea* or obstructive*).tw,kf,ot.                      | 133173  |             |
| 5  | 3 and 4                                                                   | 30224   | 2 and 3     |
| 6  | (OSA or OSAS or OSAHS or SHS or SAHS).tw,kf,ot.                           | 22588   |             |
| 7  | 1 or 2 or 3 or 5 or 6                                                     | 50267   |             |
| 8  | Gastric Bypass/                                                           | 9332    |             |
| 9  | (bypass* adj3 (gastric* or gastroileal* or roux-en-y gastric*)).tw,kf,ot. | 11803   |             |
| 10 | astrojejunosom*.tw,kf,ot.                                                 | 1       |             |
| 11 | or/8-10                                                                   | 13913   |             |
| 12 | Anastomosis, Roux-en-Y/                                                   | 3491    |             |
| 13 | (roux en y or roux y).tw,kf,ot.                                           | 11646   |             |
| 14 | (RYGB or LRYGB or B-RYGB).tw,kf,ot.                                       | 3794    |             |
| 15 | or/12-14                                                                  | 12913   |             |
| 16 | 7 and (11 or 15)                                                          | 460     |             |
| 17 | meta analysis.pt.                                                         | 115768  |             |
| 18 | meta analysis.mp.                                                         | 187180  |             |
| 19 | review.pt.                                                                | 2656587 |             |
| 20 | search*.tw.                                                               | 459682  |             |
| 21 | or/17-20                                                                  | 3002410 |             |
| 22 | exp clinical pathway/                                                     | 6706    |             |
| 23 | exp clinical protocol/                                                    | 167108  |             |

|    |                                                                                                                                                            |        |  |
|----|------------------------------------------------------------------------------------------------------------------------------------------------------------|--------|--|
| 24 | exp consensus/                                                                                                                                             | 12857  |  |
| 25 | exp consensus development conference/                                                                                                                      | 11962  |  |
| 26 | exp consensus development conferences as topic/                                                                                                            | 2836   |  |
| 27 | critical pathways/                                                                                                                                         | 6706   |  |
| 28 | exp guideline/                                                                                                                                             | 34048  |  |
| 29 | guidelines as topic/                                                                                                                                       | 39665  |  |
| 30 | exp practice guideline/                                                                                                                                    | 27110  |  |
| 31 | practice guidelines as topic/                                                                                                                              | 117410 |  |
| 32 | health planning guidelines/                                                                                                                                | 4086   |  |
| 33 | (guideline or practice guideline or consensus development conference or consensus development conference, NIH).pt.                                         | 43409  |  |
| 34 | (position statement* or policy statement* or practice parameter* or best practice*).ti,ab,kf,kw.                                                           | 33103  |  |
| 35 | (standards or guideline or guidelines).ti,kf,kw.                                                                                                           | 109877 |  |
| 36 | ((practice or treatment* or clinical) adj guideline*).ab.                                                                                                  | 39949  |  |
| 37 | (CPG or CPGs).ti.                                                                                                                                          | 5730   |  |
| 38 | consensus*.ti,kf,kw.                                                                                                                                       | 26154  |  |
| 39 | consensus*.ab. /freq=2                                                                                                                                     | 25204  |  |
| 40 | ((critical or clinical or practice) adj2 (path or paths or pathway or pathways or protocol*)).ti,ab,kf,kw.                                                 | 20215  |  |
| 41 | recommenda*.ti,kf,kw.                                                                                                                                      | 41112  |  |
| 42 | (care adj2 (standard or path or paths or pathway or pathways or map or maps or plan or plans)).ti,ab,kf,kw.                                                | 58764  |  |
| 43 | (algorithm* adj2 (screening or examination or test or tested or testing or assessment* or diagnosis or diagnoses or diagnosed or diagnosing)).ti,ab,kf,kw. | 7620   |  |
| 44 | (algorithm* adj2 (pharmacotherap* or chemotherap* or chemotreatment* or therap* or treatment* or intervention*)).ti,ab,kf,kw.                              | 9843   |  |
| 45 | or/22-44                                                                                                                                                   | 613690 |  |
| 46 | randomized controlled trial.pt.                                                                                                                            | 507458 |  |
| 47 | controlled clinical trial.pt.                                                                                                                              | 93712  |  |
| 48 | randomi?ed.ab.                                                                                                                                             | 577230 |  |

|    |                          |         |  |
|----|--------------------------|---------|--|
| 49 | placebo.ab.              | 208492  |  |
| 50 | drug therapy.fs.         | 2210650 |  |
| 51 | randomly.ab.             | 335022  |  |
| 52 | trial.ab.                | 508651  |  |
| 53 | groups.ab.               | 2056514 |  |
| 54 | or/46-53                 | 4739084 |  |
| 55 | exp animals/ not humans/ | 4706928 |  |
| 56 | 54 not 55                | 4112484 |  |
| 57 | 16 and (21 or 45 or 56)  | 193     |  |

**Cochrane Central Register of Controlled Trials (Central, 2020, Issue 06) in the Cochrane Library (searched 15 June 2020)**

ID Search

- #1 MeSH descriptor: [Sleep Apnoea Syndromes] explode all trees
- #2 MeSH descriptor: [Sleep Apnoea, Obstructive] explode all trees
- #3 ((apnoea\* or apnoea\*) near/3 sleep\*)
- #4 (hypopnoea\* or hypopnoea\* or obstructive\*)
- #5 #3 and #4
- #6 (OSA or OSAS or OSAHS or SHS or SAHS)
- #7 #1 or #2 or #3 or #5 or #6
- #8 MeSH descriptor: [Gastric Bypass] explode all trees
- #9 (bypass\* near/3 (gastric\* or gastroileal\* or roux-en-y gastric\*))
- #10 astrojejunostom\*
- #11 #8 or #9 or #10
- #12 MeSH descriptor: [Anastomosis, Roux-en-Y] explode all trees
- #13 (roux en y or roux y)
- #14 (RYGB or LRYGB or B-RYGB)
- #15 #12 or #13 or #14
- #16 #7 and (#11 or #15)

## Table e5: Search strategies PICO 2

### Medline (Ovid) search strategy

| #  | Searches                                                             |
|----|----------------------------------------------------------------------|
| 1  | sleep apnoea syndromes/                                              |
| 2  | exp Sleep Apnoea, Obstructive/                                       |
| 3  | ((apnoea* or apnoea*) adj3 sleep*).tw,kf,ot.                         |
| 4  | (hypopnoea* or hypopnoea* or obstructive*).tw,kf,ot.                 |
| 5  | 3 and 4                                                              |
| 6  | "upper airway resistance sleep apnoea syndrome".mp.                  |
| 7  | (OSA or OSAS or OSAHS or SHS or SAHS).tw,kf,ot.                      |
| 8  | 1 or 2 or 3 or 5 or 6 or 7                                           |
| 9  | Mandibular Advancement/                                              |
| 10 | (mandibular* adj2 advancement*).tw,kf,ot.                            |
| 11 | exp orthodontic appliances/                                          |
| 12 | ((oral* or orthodontic*) adj2 appliance*).tw,kf,ot.                  |
| 13 | Orthodontic Appliance Design/                                        |
| 14 | (functional* adj2 appliance*).tw,kf,ot.                              |
| 15 | (mandibular* adj3 (splint* or positioning* or appliance*)).tw,kf,ot. |
| 16 | *splints/                                                            |
| 17 | block*.tw,kf,ot.                                                     |
| 18 | (duo* or twin* or two-piece).tw,kf,ot.                               |
| 19 | 17 and 18                                                            |
| 20 | ((twin-block* or TB) adj2 appliance*).tw,kf,ot.                      |
| 21 | herbst*.tw.                                                          |
| 22 | 9 or 10 or 11 or 12 or 13 or 14 or 15 or 16 or 19 or 21              |
| 23 | 8 and 22                                                             |
| 24 | meta analysis.mp.                                                    |
| 25 | meta analysis.pt.                                                    |
| 26 | review.pt.                                                           |
| 27 | search*.tw.                                                          |

- 28 or/24-27
- 29 exp clinical pathway/
- 30 exp clinical protocol/
- 31 exp consensus/
- 32 exp consensus development conference/
- 33 exp consensus development conferences as topic/
- 34 critical pathways/
- 35 exp guideline/
- 36 guidelines as topic/
- 37 exp practice guideline/
- 38 practice guidelines as topic/
- 39 health planning guidelines/
- 40 (guideline or practice guideline or consensus development conference or consensus development conference, NIH).pt.
- 41 (position statement\* or policy statement\* or practice parameter\* or best practice\*).ti,ab,kf,kw.
- 42 (standards or guideline or guidelines).ti,kf,kw.
- 43 ((practice or treatment\* or clinical) adj guideline\*).ab.
- 44 (CPG or CPGs).ti.
- 45 consensus\*.ti,kf,kw.
- 46 consensus\*.ab. /freq=2
- 47 ((critical or clinical or practice) adj2 (path or paths or pathway or pathways or protocol\*)).ti,ab,kf,kw.
- 48 recommendat\*.ti,kf,kw.
- 49 (care adj2 (standard or path or paths or pathway or pathways or map or maps or plan or plans)).ti,ab,kf,kw.
- 50 (algorithm\* adj2 (screening or examination or test or tested or testing or assessment\* or diagnosis or diagnoses or diagnosed or diagnosing)).ti,ab,kf,kw.
- 51 (algorithm\* adj2 (pharmacotherap\* or chemotherap\* or chemotreatment\* or therap\* or treatment\* or intervention\*)).ti,ab,kf,kw.
- 52 or/29-51
- 53 randomized controlled trial.pt.

- 54 controlled clinical trial.pt.
- 55 randomi?ed.ab.
- 56 placebo.ab.
- 57 drug therapy.fs.
- 58 randomly.ab.
- 59 trial.ab.
- 60 groups.ab.
- 61 or/53-60
- 62 exp animals/ not humans/
- 63 61 not 62
- 64 23 and 28
- 65 23 and 52
- 66 23 and 63
- 67 23 and (28 or 52 or 63)

**Cochrane Central Register of Controlled Trials (Central, 2020, Issue 06) in the Cochrane Library (searched 15 June 2020)**

- | ID  | Search                                                         |
|-----|----------------------------------------------------------------|
| #1  | MeSH descriptor: [Sleep Apnoea Syndromes] explode all trees    |
| #2  | MeSH descriptor: [Sleep Apnoea, Obstructive] explode all trees |
| #3  | ((apnoea* or apnoea*) near/3 sleep*)                           |
| #4  | (hypopnoea* or hypopnoea* or obstructive*)                     |
| #5  | #3 and #4                                                      |
| #6  | (OSA or OSAS or OSAHS or SHS or SAHS)                          |
| #7  | #1 or #2 or #3 or #5 or #6                                     |
| #8  | MeSH descriptor: [Mandibular Advancement] explode all trees    |
| #9  | (mandibular* near/2 advancement*)                              |
| #10 | MeSH descriptor: [Orthodontic Appliances] explode all trees    |
| #11 | ((oral* or orthodontic*) near/2 appliance*)                    |



- #12 MeSH descriptor: [Orthodontic Appliance Design] explode all trees
- #13 (functional\* near/2 appliance\*)
- #14 (mandibular\* near/3 (splint\* or positioning\* or appliance\*))
- #15 MeSH descriptor: [Splints] explode all trees
- #16 block\*
- #17 (duo\* or twin\* or two-piece)
- #18 #16 and #17
- #19 ((twin-block\* or TB) near/2 appliance\*)
- #20 herbst\*
- #21 #8 or #9 or #10 or #11 or #12 or #13 or #14 or #15 or #18 or #19 or #20
- #22 #7 and #21
- #23 #22 in Trials

**Table e6: Search strategies PICO 3**

**Medline / Ovid Search Strategy:**

- | #  | Searches                                                              |
|----|-----------------------------------------------------------------------|
| 1  | SLEEP APNOEA SYNDROMES/                                               |
| 2  | exp SLEEP APNOEA, OBSTRUCTIVE/                                        |
| 3  | ((apnoea* or apnoea*) adj3 sleep*).tw,kf,ot.                          |
| 4  | (hypopnoea* or hypopnoea* or obstructive*).tw,kf,ot.                  |
| 5  | 3 and 4                                                               |
| 6  | (OSA or OSAS or OSAHS or SHS or SAHS).tw,kf,ot.                       |
| 7  | 1 or 2 or 3 or 5 or 6                                                 |
| 8  | HYPOGLOSSAL NERVE/                                                    |
| 9  | (nerve* adj2 (hypoglossal* or hypoglossus* or XII or XIIS)).tw,kf,ot. |
| 10 | (nervus adj2 (hypoglossal* or hypoglossus* or XII or XIIS)).tw,kf,ot. |
| 11 | (cranial adj2 nerve* adj2 (twelfth or XII or XIIS or "12")).tw,kf,ot. |
| 12 | CARDIOSA*.tw,kf,ot.                                                   |
| 13 | exp ELECTRIC STIMULATION THERAPY/                                     |

- 14 (stimulation\* adj2 therap\*).tw,kf,ot.
- 15 ELECTRIC STIMULATION/
- 16 TRANSCUTANEOUS ELECTRIC NERVE STIMULATION/
- 17 exp IMPLANTABLE NEUROSTIMULATORS/
- 18 (neurostimulator\* or nerve stimulation\*).tw,kf,ot.
- 19 inspire.tw,kf,ot.
- 20 ImThera.tw,kf,ot.
- 21 Nyxoah.tw,kf,ot.
- 22 TESLA.tw,kf,ot.
- 23 (hypoglossal nerve\* or hypoglossal nervus or upper-airway or transcutaneous or submental\* or cranial nerve\* or cranial nervus or genioglossus or electronic\*).tw,kf,ot.
- 24 (stimulation\* or stimulator\*).tw,kf,ot.
- 25 23 and 24
- 26 (HGNS or UAS).tw,kf,ot.
- 27 8 or 9 or 10 or 11 or 12 or 13 or 14 or 15 or 16 or 17 or 18 or 19 or 20 or 21  
or 22 or 25 or 26
- 28 7 and 27
- 29 exp ANIMALS/ not HUMANS/
- 30 28 not 29

**Cochrane Central Register of Controlled Trials (Central, 2020, Issue 06) in the Cochrane Library (searched 15 June 2020)**

- | ID | Search                                                         |
|----|----------------------------------------------------------------|
| #1 | MeSH descriptor: [Sleep Apnoea Syndromes] explode all trees    |
| #2 | MeSH descriptor: [Sleep Apnoea, Obstructive] explode all trees |
| #3 | ((apnoea* or apnoea*) near/3 sleep*)                           |
| #4 | (hypopnoea* or hypopnoea* or obstructive*)                     |
| #5 | #3 and #4                                                      |
| #6 | (OSA or OSAS or OSAHS or SHS or SAHS)                          |
| #7 | #1 or #2 or #3 or #5 or #6                                     |

- #8 MeSH descriptor: [Hypoglossal Nerve] explode all trees
- #9 (nerve\* near/2 (hypoglossal\* or hypoglossus\* or XII or XIIS))
- #10 (nervus near/2 (hypoglossal\* or hypoglossus\* or XII or XIIS))
- #11 (cranial near/2 nerve\* near/2 (twelfth or XII or XIIS or "12"))
- #12 CARDIOSA\*
- #13 MeSH descriptor: [Electric Stimulation Therapy] explode all trees
- #14 (stimulation\* near/2 therap\*)
- #15 MeSH descriptor: [Electric Stimulation] explode all trees
- #16 MeSH descriptor: [Transcutaneous Electric Nerve Stimulation] explode all trees
- #17 MeSH descriptor: [Implantable Neurostimulators] explode all trees
- #18 (neurostimulator\* or nerve stimulation\*)
- #19 inspire
- #20 ImThera
- #21 Nyxoah
- #22 TESLA
- #23 (hypoglossal nerve\* or hypoglossal nervus or upper-airway or transcutaneous or submental\* or cranial nerve\* or cranial nervus or genioglossus or electronic\*)
- #24 (stimulation\* or stimulator\*)
- #25 #23 and #24
- #26 (HGNS or UAS)
- #27 #8 or #9 or #10 or #11 or #12 or #13 or #14 or #15 or #16 or #17 or #18 or #19 or #20 or #21 or #22 or #25 or #26
- #28 #7 and #27

**Table e7: Search strategies PICO 4**

**Medline (Ovid) search strategy:**

|   |                         |
|---|-------------------------|
| # | Searches                |
| 1 | SLEEP APNOEA SYNDROMES/ |

2 exp SLEEP APNOEA, OBSTRUCTIVE/  
3 ((apnoea\* or apnoea\*) adj3 sleep\*).tw,kf,ot.  
4 (hypopnoea\* or hypopnoea\* or obstructive\*).tw,kf,ot.  
5 3 and 4  
6 (OSA or OSAS or OSAHS or SHS or SAHS).tw,kf,ot.  
7 1 or 2 or 3 or 5 or 6  
8 SNORING/  
9 snoring\*.tw,kf,ot.  
10 upper airway resistance syndrome\*.tw.  
11 or/8-10  
12 7 or 11  
13 MYOFUNCTIONAL THERAPY/  
14 myofunctional\*.tw,kf,ot.  
15 (myo-therap\* or myotherap\*).tw,kf,ot.  
16 (myolog\* adj3 (oro-facial\* or orofacial\*)).tw,kf,ot.  
17 (oropharyngeal\* or oropharingeal\* or orofaringeal\*).tw,kf,ot.  
18 myofascial reeducation\*.tw,kf,ot.  
19 (upper airway adj3 (exercise\* or remodeling\*)).tw,kf,ot.  
20 SPEECH THERAPY/  
21 speech therap\*.tw,kf,ot.  
22 EXERCISE THERAPY/  
23 TONGUE/  
24 22 and 23  
25 ((pharyngeal\* or pharingeal\*) adj3 (muscle\* or musculatur\*)).tw,kf,ot.  
26 (tongue\* adj3 (task\* or exercise\*)).tw,kf,ot.  
27 MUSIC THERAPY/  
28 didgeridoo\*.tw,kf,ot.  
29 13 or 14 or 15 or 16 or 17 or 18 or 19 or 20 or 21 or 24 or 25 or 26 or 27 or  
28  
30 12 and 29  
31 meta analysis.mp.

32 meta analysis.pt.

33 review.pt.

34 search\*.tw.

35 or/31-34

36 exp CLINICAL PATHWAY/

37 exp CLINICAL PROTOCOL/

38 exp CONSENSUS/

39 exp CONSENSUS DEVELOPMENT CONFERENCE/

40 exp CONSENSUS DEVELOPMENT CONFERENCES AS TOPIC/

41 CRITICAL PATHWAYS/

42 exp GUIDELINE/

43 GUIDELINES AS TOPIC/

44 exp PRACTICE GUIDELINE/

45 PRACTICE GUIDELINES AS TOPIC/

46 HEALTH PLANNING GUIDELINES/

47 (guideline or practice guideline or consensus development conference or consensus development conference, NIH).pt.

48 (position statement\* or policy statement\* or practice parameter\* or best practice\*).ti,ab,kf,kw.

49 (standards or guideline or guidelines).ti,kf,kw.

50 ((practice or treatment\* or clinical) adj guideline\*).ab.

51 (CPG or CPGs).ti.

52 consensus\*.ti,kf,kw.

53 consensus\*.ab. /freq=2

54 ((critical or clinical or practice) adj2 (path or paths or pathway or pathways or protocol\*)).ti,ab,kf,kw.

55 recommendat\*.ti,kf,kw.

56 (care adj2 (standard or path or paths or pathway or pathways or map or maps or plan or plans)).ti,ab,kf,kw.

57 (algorithm\* adj2 (screening or examination or test or tested or testing or assessment\* or diagnosis or diagnoses or diagnosed or diagnosing)).ti,ab,kf,kw.

- 58 (algorithm\* adj2 (pharmacotherap\* or chemotherap\* or chemotreatment\* or therap\* or treatment\* or intervention\*)).ti,ab,kf,kw.
- 59 or/36-58
- 60 randomized controlled trial.pt.
- 61 controlled clinical trial.pt.
- 62 randomi?ed.ab.
- 63 placebo.ab.
- 64 drug therapy.fs.
- 65 randomly.ab.
- 66 trial.ab.
- 67 groups.ab.
- 68 or/60-67
- 69 exp ANIMALS/ not HUMANS/
- 70 30 and (35 or 59 or 70)

**Medline (Ovid) search strategy:**

- # Searches
- 1 SLEEP APNOEA SYNDROMES/
- 2 exp SLEEP APNOEA, OBSTRUCTIVE/
- 3 ((apnoea\* or apnoea\*) adj3 sleep\*).tw,kf,ot.
- 4 (hypopnoea\* or hypopnoea\* or obstructive\*).tw,kf,ot.
- 5 3 and 4
- 6 (OSA or OSAS or OSAHS or SHS or SAHS).tw,kf,ot.
- 7 1 or 2 or 3 or 5 or 6
- 8 SNORING/
- 9 snoring\*.tw,kf,ot.
- 10 upper airway resistance syndrome\*.tw.
- 11 or/8-10
- 12 7 or 11
- 13 MYOFUNCTIONAL THERAPY/

14 myofunctional\*.tw,kf,ot.  
15 (myo-therap\* or myotherap\*).tw,kf,ot.  
16 (myolog\* adj3 (oro-facial\* or orofacial\*)).tw,kf,ot.  
17 (oropharyngeal\* or oropharingeal\* or orofaringeal\*).tw,kf,ot.  
18 myofascial reeducation\*.tw,kf,ot.  
19 (upper airway adj3 (exercise\* or remodeling\*)).tw,kf,ot.  
20 SPEECH THERAPY/  
21 speech therap\*.tw,kf,ot.  
22 EXERCISE THERAPY/  
23 TONGUE/  
24 22 and 23  
25 ((pharyngeal\* or pharingeal\*) adj3 (muscle\* or musculatur\*)).tw,kf,ot.  
26 (tongue\* adj3 (task\* or exercise\*)).tw,kf,ot.  
27 MUSIC THERAPY/  
28 didgeridoo\*.tw,kf,ot.  
29 13 or 14 or 15 or 16 or 17 or 18 or 19 or 20 or 21 or 24 or 25 or 26 or 27 or  
28  
30 12 and 29  
31 meta analysis.mp.  
32 meta analysis.pt.  
33 review.pt.  
34 search\*.tw.  
35 or/31-34  
36 exp CLINICAL PATHWAY/  
37 exp CLINICAL PROTOCOL/  
38 exp CONSENSUS/  
39 exp CONSENSUS DEVELOPMENT CONFERENCE/  
40 exp CONSENSUS DEVELOPMENT CONFERENCES AS TOPIC/  
41 CRITICAL PATHWAYS/  
42 exp GUIDELINE/  
43 GUIDELINES AS TOPIC/

44 exp PRACTICE GUIDELINE/  
45 PRACTICE GUIDELINES AS TOPIC/  
46 HEALTH PLANNING GUIDELINES/  
47 (guideline or practice guideline or consensus development conference or  
consensus development conference, NIH).pt.  
48 (position statement\* or policy statement\* or practice parameter\* or best  
practice\*).ti,ab,kf,kw.  
49 (standards or guideline or guidelines).ti,kf,kw.  
50 ((practice or treatment\* or clinical) adj guideline\*).ab.  
51 (CPG or CPGs).ti.  
52 consensus\*.ti,kf,kw.  
53 consensus\*.ab. /freq=2  
54 ((critical or clinical or practice) adj2 (path or paths or pathway or pathways or  
protocol\*).ti,ab,kf,kw.  
55 recommendat\*.ti,kf,kw.  
56 (care adj2 (standard or path or paths or pathway or pathways or map or  
maps or plan or plans)).ti,ab,kf,kw.  
57 (algorithm\* adj2 (screening or examination or test or tested or testing or  
assessment\* or diagnosis or diagnoses or diagnosed or  
diagnosing)).ti,ab,kf,kw.  
58 (algorithm\* adj2 (pharmacotherap\* or chemotherap\* or chemotreatment\* or  
therap\* or treatment\* or intervention\*).ti,ab,kf,kw.  
59 or/36-58  
60 randomized controlled trial.pt.  
61 controlled clinical trial.pt.  
62 randomi?ed.ab.  
63 placebo.ab.  
64 drug therapy.fs.  
65 randomly.ab.  
66 trial.ab.  
67 groups.ab.  
68 or/60-67  
69 exp ANIMALS/ not HUMANS/



70 30 and (35 or 59 or 70)

**Table e8: Search strategies PICO 5**

**Medline (Ovid) search strategy:**

| #  | Searches                                                               |
|----|------------------------------------------------------------------------|
| 1  | SLEEP APNOEA SYNDROMES/                                                |
| 2  | exp SLEEP APNOEA, OBSTRUCTIVE/                                         |
| 3  | ((apnoea* or apnoea*) adj3 sleep*).tw,kf,ot.                           |
| 4  | (hypopnoea* or hypopnoea* or obstructive*).tw,kf,ot.                   |
| 5  | 3 and 4                                                                |
| 6  | (OSA or OSAS or OSAHS or SHS or SAHS).tw,kf,ot.                        |
| 7  | 1 or 2 or 3 or 5 or 6                                                  |
| 8  | SNORING/                                                               |
| 9  | snoring*.tw,kf,ot.                                                     |
| 10 | upper airway resistance syndrome*.tw.                                  |
| 11 | or/8-10                                                                |
| 12 | 7 or 11                                                                |
| 13 | MYOFUNCTIONAL THERAPY/                                                 |
| 14 | myofunctional*.tw,kf,ot.                                               |
| 15 | (myo-therap* or myotherap*).tw,kf,ot.                                  |
| 16 | (myolog* adj3 (oro-facial* or orofacial*)).tw,kf,ot.                   |
| 17 | (oropharyngeal* or oropharyngeal* or orofaryngeal*).tw,kf,ot.          |
| 18 | myofascial reeducation*.tw,kf,ot.                                      |
| 19 | (upper airway adj3 (exercise* or remodeling*)).tw,kf,ot.               |
| 20 | SPEECH THERAPY/                                                        |
| 21 | speech therap*.tw,kf,ot.                                               |
| 22 | EXERCISE THERAPY/                                                      |
| 23 | TONGUE/                                                                |
| 24 | 22 and 23                                                              |
| 25 | ((pharyngeal* or pharyngeal*) adj3 (muscle* or musculatur*)).tw,kf,ot. |

26 (tongue\* adj3 (task\* or exercise\*)).tw,kf,ot.  
27 MUSIC THERAPY/  
28 didgeridoo\*.tw,kf,ot.  
29 13 or 14 or 15 or 16 or 17 or 18 or 19 or 20 or 21 or 24 or 25 or 26 or 27 or  
28  
30 12 and 29  
31 meta analysis.mp.  
32 meta analysis.pt.  
33 review.pt.  
34 search\*.tw.  
35 or/31-34  
36 exp CLINICAL PATHWAY/  
37 exp CLINICAL PROTOCOL/  
38 exp CONSENSUS/  
39 exp CONSENSUS DEVELOPMENT CONFERENCE/  
40 exp CONSENSUS DEVELOPMENT CONFERENCES AS TOPIC/  
41 CRITICAL PATHWAYS/  
42 exp GUIDELINE/  
43 GUIDELINES AS TOPIC/  
44 exp PRACTICE GUIDELINE/  
45 PRACTICE GUIDELINES AS TOPIC/  
46 HEALTH PLANNING GUIDELINES/  
47 (guideline or practice guideline or consensus development conference or  
consensus development conference, NIH).pt.  
48 (position statement\* or policy statement\* or practice parameter\* or best  
practice\*).ti,ab,kf,kw.  
49 (standards or guideline or guidelines).ti,kf,kw.  
50 ((practice or treatment\* or clinical) adj guideline\*).ab.  
51 (CPG or CPGs).ti.  
52 consensus\*.ti,kf,kw.  
53 consensus\*.ab. /freq=2

- 54 ((critical or clinical or practice) adj2 (path or paths or pathway or pathways or protocol\*)).ti,ab,kf,kw.
- 55 recommendat\*.ti,kf,kw.
- 56 (care adj2 (standard or path or paths or pathway or pathways or map or maps or plan or plans)).ti,ab,kf,kw.
- 57 (algorithm\* adj2 (screening or examination or test or tested or testing or assessment\* or diagnosis or diagnoses or diagnosed or diagnosing)).ti,ab,kf,kw.
- 58 (algorithm\* adj2 (pharmacotherap\* or chemotherap\* or chemotreatment\* or therap\* or treatment\* or intervention\*)).ti,ab,kf,kw.
- 59 or/36-58
- 60 randomized controlled trial.pt.
- 61 controlled clinical trial.pt.
- 62 randomi?ed.ab.
- 63 placebo.ab.
- 64 drug therapy.fs.
- 65 randomly.ab.
- 66 trial.ab.
- 67 groups.ab.
- 68 or/60-67
- 69 exp ANIMALS/ not HUMANS/
- 70 30 and (35 or 59 or 70)

**Medline (Ovid) search strategy:**

- # Searches
- 1 SLEEP APNOEA SYNDROMES/
- 2 exp SLEEP APNOEA, OBSTRUCTIVE/
- 3 ((apnoea\* or apnoea\*) adj3 sleep\*).tw,kf,ot.
- 4 (hypopnoea\* or hypopnoea\* or obstructive\*).tw,kf,ot.
- 5 3 and 4
- 6 (OSA or OSAS or OSAHS or SHS or SAHS).tw,kf,ot.
- 7 1 or 2 or 3 or 5 or 6

8 SNORING/  
9 snoring\*.tw,kf,ot.  
10 upper airway resistance syndrome\*.tw.  
11 or/8-10  
12 7 or 11  
13 MYOFUNCTIONAL THERAPY/  
14 myofunctional\*.tw,kf,ot.  
15 (myo-therap\* or myotherap\*).tw,kf,ot.  
16 (myolog\* adj3 (oro-facial\* or orofacial\*)).tw,kf,ot.  
17 (oropharyngeal\* or oropharingeal\* or orofaringeal\*).tw,kf,ot.  
18 myofascial reeducation\*.tw,kf,ot.  
19 (upper airway adj3 (exercise\* or remodeling\*)).tw,kf,ot.  
20 SPEECH THERAPY/  
21 speech therap\*.tw,kf,ot.  
22 EXERCISE THERAPY/  
23 TONGUE/  
24 22 and 23  
25 ((pharyngeal\* or pharingeal\*) adj3 (muscle\* or musculatur\*)).tw,kf,ot.  
26 (tongue\* adj3 (task\* or exercise\*)).tw,kf,ot.  
27 MUSIC THERAPY/  
28 didgeridoo\*.tw,kf,ot.  
29 13 or 14 or 15 or 16 or 17 or 18 or 19 or 20 or 21 or 24 or 25 or 26 or 27 or  
28  
30 12 and 29  
31 meta analysis.mp.  
32 meta analysis.pt.  
33 review.pt.  
34 search\*.tw.  
35 or/31-34  
36 exp CLINICAL PATHWAY/  
37 exp CLINICAL PROTOCOL/

38 exp CONSENSUS/  
39 exp CONSENSUS DEVELOPMENT CONFERENCE/  
40 exp CONSENSUS DEVELOPMENT CONFERENCES AS TOPIC/  
41 CRITICAL PATHWAYS/  
42 exp GUIDELINE/  
43 GUIDELINES AS TOPIC/  
44 exp PRACTICE GUIDELINE/  
45 PRACTICE GUIDELINES AS TOPIC/  
46 HEALTH PLANNING GUIDELINES/  
47 (guideline or practice guideline or consensus development conference or  
consensus development conference, NIH).pt.  
48 (position statement\* or policy statement\* or practice parameter\* or best  
practice\*).ti,ab,kf,kw.  
49 (standards or guideline or guidelines).ti,kf,kw.  
50 ((practice or treatment\* or clinical) adj guideline\*).ab.  
51 (CPG or CPGs).ti.  
52 consensus\*.ti,kf,kw.  
53 consensus\*.ab. /freq=2  
54 ((critical or clinical or practice) adj2 (path or paths or pathway or pathways or  
protocol\*)).ti,ab,kf,kw.  
55 recommendat\*.ti,kf,kw.  
56 (care adj2 (standard or path or paths or pathway or pathways or map or  
maps or plan or plans)).ti,ab,kf,kw.  
57 (algorithm\* adj2 (screening or examination or test or tested or testing or  
assessment\* or diagnosis or diagnoses or diagnosed or  
diagnosing)).ti,ab,kf,kw.  
58 (algorithm\* adj2 (pharmacotherap\* or chemotherap\* or chemotreatment\* or  
therap\* or treatment\* or intervention\*)).ti,ab,kf,kw.  
59 or/36-58  
60 randomized controlled trial.pt.  
61 controlled clinical trial.pt.  
62 randomi?ed.ab.  
63 placebo.ab.

- 64 drug therapy.fs.
- 65 randomly.ab.
- 66 trial.ab.
- 67 groups.ab.
- 68 or/60-67
- 69 exp ANIMALS/ not HUMANS/
- 70 30 and (35 or 59 or 70)

**Table e9: Search strategies PICO 6**

**Medline (Ovid) search strategy:**

- | #  | Searches                                                      |
|----|---------------------------------------------------------------|
| 1  | SLEEP APNOEA SYNDROMES/                                       |
| 2  | exp SLEEP APNOEA, OBSTRUCTIVE/                                |
| 3  | ((apnoea* or apnoea*) adj3 sleep*).tw,kf,ot.                  |
| 4  | (hypopnoea* or hypopnoea* or obstructive*).tw,kf,ot.          |
| 5  | 3 and 4                                                       |
| 6  | (OSA or OSAS or OSAHS or SHS or SAHS).tw,kf,ot.               |
| 7  | 1 or 2 or 3 or 5 or 6                                         |
| 8  | SNORING/                                                      |
| 9  | snoring*.tw,kf,ot.                                            |
| 10 | upper airway resistance syndrome*.tw.                         |
| 11 | or/8-10                                                       |
| 12 | 7 or 11                                                       |
| 13 | MYOFUNCTIONAL THERAPY/                                        |
| 14 | myofunctional*.tw,kf,ot.                                      |
| 15 | (myo-therap* or myotherap*).tw,kf,ot.                         |
| 16 | (myolog* adj3 (oro-facial* or orofacial*)).tw,kf,ot.          |
| 17 | (oropharyngeal* or oropharingeal* or orofaringeal*).tw,kf,ot. |
| 18 | myofascial reeducation*.tw,kf,ot.                             |

19 (upper airway adj3 (exercise\* or remodeling\*).tw,kf,ot.  
20 SPEECH THERAPY/  
21 speech therap\*.tw,kf,ot.  
22 EXERCISE THERAPY/  
23 TONGUE/  
24 22 and 23  
25 ((pharyngeal\* or pharyngeal\*) adj3 (muscle\* or musculatur\*).tw,kf,ot.  
26 (tongue\* adj3 (task\* or exercise\*).tw,kf,ot.  
27 MUSIC THERAPY/  
28 didgeridoo\*.tw,kf,ot.  
29 13 or 14 or 15 or 16 or 17 or 18 or 19 or 20 or 21 or 24 or 25 or 26 or 27 or  
28  
30 12 and 29  
31 meta analysis.mp.  
32 meta analysis.pt.  
33 review.pt.  
34 search\*.tw.  
35 or/31-34  
36 exp CLINICAL PATHWAY/  
37 exp CLINICAL PROTOCOL/  
38 exp CONSENSUS/  
39 exp CONSENSUS DEVELOPMENT CONFERENCE/  
40 exp CONSENSUS DEVELOPMENT CONFERENCES AS TOPIC/  
41 CRITICAL PATHWAYS/  
42 exp GUIDELINE/  
43 GUIDELINES AS TOPIC/  
44 exp PRACTICE GUIDELINE/  
45 PRACTICE GUIDELINES AS TOPIC/  
46 HEALTH PLANNING GUIDELINES/  
47 (guideline or practice guideline or consensus development conference or  
consensus development conference, NIH).pt.

- 48 (position statement\* or policy statement\* or practice parameter\* or best practice\*).ti,ab,kf,kw.
- 49 (standards or guideline or guidelines).ti,kf,kw.
- 50 ((practice or treatment\* or clinical) adj guideline\*).ab.
- 51 (CPG or CPGs).ti.
- 52 consensus\*.ti,kf,kw.
- 53 consensus\*.ab. /freq=2
- 54 ((critical or clinical or practice) adj2 (path or paths or pathway or pathways or protocol\*)).ti,ab,kf,kw.
- 55 recommendat\*.ti,kf,kw.
- 56 (care adj2 (standard or path or paths or pathway or pathways or map or maps or plan or plans)).ti,ab,kf,kw.
- 57 (algorithm\* adj2 (screening or examination or test or tested or testing or assessment\* or diagnosis or diagnoses or diagnosed or diagnosing)).ti,ab,kf,kw.
- 58 (algorithm\* adj2 (pharmacotherap\* or chemotherap\* or chemotreatment\* or therap\* or treatment\* or intervention\*)).ti,ab,kf,kw.
- 59 or/36-58
- 60 randomized controlled trial.pt.
- 61 controlled clinical trial.pt.
- 62 randomi?ed.ab.
- 63 placebo.ab.
- 64 drug therapy.fs.
- 65 randomly.ab.
- 66 trial.ab.
- 67 groups.ab.
- 68 or/60-67
- 69 exp ANIMALS/ not HUMANS/
- 70 30 and (35 or 59 or 70)

**Medline (Ovid) search strategy:**

# Searches



1 SLEEP APNOEA SYNDROMES/  
2 exp SLEEP APNOEA, OBSTRUCTIVE/  
3 ((apnoea\* or apnoea\*) adj3 sleep\*).tw,kf,ot.  
4 (hypopnoea\* or hypopnoea\* or obstructive\*).tw,kf,ot.  
5 3 and 4  
6 (OSA or OSAS or OSAHS or SHS or SAHS).tw,kf,ot.  
7 1 or 2 or 3 or 5 or 6  
8 SNORING/  
9 snoring\*.tw,kf,ot.  
10 upper airway resistance syndrome\*.tw.  
11 or/8-10  
12 7 or 11  
13 MYOFUNCTIONAL THERAPY/  
14 myofunctional\*.tw,kf,ot.  
15 (myo-therap\* or myotherap\*).tw,kf,ot.  
16 (myolog\* adj3 (oro-facial\* or orofacial\*)).tw,kf,ot.  
17 (oropharyngeal\* or oropharingeal\* or orofaringeal\*).tw,kf,ot.  
18 myofacial reeducation\*.tw,kf,ot.  
19 (upper airway adj3 (exercise\* or remodeling\*)).tw,kf,ot.  
20 SPEECH THERAPY/  
21 speech therap\*.tw,kf,ot.  
22 EXERCISE THERAPY/  
23 TONGUE/  
24 22 and 23  
25 ((pharyngeal\* or pharingeal\*) adj3 (muscle\* or musculatur\*)).tw,kf,ot.  
26 (tongue\* adj3 (task\* or exercise\*)).tw,kf,ot.  
27 MUSIC THERAPY/  
28 didgeridoo\*.tw,kf,ot.  
29 13 or 14 or 15 or 16 or 17 or 18 or 19 or 20 or 21 or 24 or 25 or 26 or 27 or  
28  
30 12 and 29

31 meta analysis.mp.  
32 meta analysis.pt.  
33 review.pt.  
34 search\*.tw.  
35 or/31-34  
36 exp CLINICAL PATHWAY/  
37 exp CLINICAL PROTOCOL/  
38 exp CONSENSUS/  
39 exp CONSENSUS DEVELOPMENT CONFERENCE/  
40 exp CONSENSUS DEVELOPMENT CONFERENCES AS TOPIC/  
41 CRITICAL PATHWAYS/  
42 exp GUIDELINE/  
43 GUIDELINES AS TOPIC/  
44 exp PRACTICE GUIDELINE/  
45 PRACTICE GUIDELINES AS TOPIC/  
46 HEALTH PLANNING GUIDELINES/  
47 (guideline or practice guideline or consensus development conference or  
consensus development conference, NIH).pt.  
48 (position statement\* or policy statement\* or practice parameter\* or best  
practice\*).ti,ab,kf,kw.  
49 (standards or guideline or guidelines).ti,kf,kw.  
50 ((practice or treatment\* or clinical) adj guideline\*).ab.  
51 (CPG or CPGs).ti.  
52 consensus\*.ti,kf,kw.  
53 consensus\*.ab. /freq=2  
54 ((critical or clinical or practice) adj2 (path or paths or pathway or pathways or  
protocol)).ti,ab,kf,kw.  
55 recommendat\*.ti,kf,kw.  
56 (care adj2 (standard or path or paths or pathway or pathways or map or  
maps or plan or plans)).ti,ab,kf,kw.  
57 (algorithm\* adj2 (screening or examination or test or tested or testing or  
assessment\* or diagnosis or diagnoses or diagnosed or  
diagnosing)).ti,ab,kf,kw.

- 58 (algorithm\* adj2 (pharmacotherap\* or chemotherap\* or chemotreatment\* or therap\* or treatment\* or intervention\*)).ti,ab,kf,kw.
- 59 or/36-58
- 60 randomized controlled trial.pt.
- 61 controlled clinical trial.pt.
- 62 randomi?ed.ab.
- 63 placebo.ab.
- 64 drug therapy.fs.
- 65 randomly.ab.
- 66 trial.ab.
- 67 groups.ab.
- 68 or/60-67
- 69 exp ANIMALS/ not HUMANS/
- 70 30 and (35 or 59 or 70)

**Table e10: Search strategies PICO 7 and 8**

**Medline (Ovid) search strategy:**

- | #  | Searches                                             |
|----|------------------------------------------------------|
| 1  | SLEEP APNOEA SYNDROMES/                              |
| 2  | exp SLEEP APNOEA, OBSTRUCTIVE/                       |
| 3  | ((apnoea* or apnoea*) adj3 sleep*).tw,kf,ot.         |
| 4  | (hypopnoea* or hypopnoea* or obstructive*).tw,kf,ot. |
| 5  | 3 and 4                                              |
| 6  | (OSA or OSAS or OSAHS or SHS or SAHS).tw,kf,ot.      |
| 7  | 1 or 2 or 3 or 5 or 6                                |
| 8  | SNORING/                                             |
| 9  | snoring*.tw,kf,ot.                                   |
| 10 | upper airway resistance syndrome*.tw.                |
| 11 | or/8-10                                              |

12 7 or 11

13 MYOFUNCTIONAL THERAPY/

14 myofunctional\*.tw,kf,ot.

15 (myo-therap\* or myotherap\*).tw,kf,ot.

16 (myolog\* adj3 (oro-facial\* or orofacial\*)).tw,kf,ot.

17 (oropharyngeal\* or oropharingeal\* or orofaringeal\*).tw,kf,ot.

18 myofacial reeducation\*.tw,kf,ot.

19 (upper airway adj3 (exercise\* or remodeling\*)).tw,kf,ot.

20 SPEECH THERAPY/

21 speech therap\*.tw,kf,ot.

22 EXERCISE THERAPY/

23 TONGUE/

24 22 and 23

25 ((pharyngeal\* or pharingeal\*) adj3 (muscle\* or musculatur\*)).tw,kf,ot.

26 (tongue\* adj3 (task\* or exercise\*)).tw,kf,ot.

27 MUSIC THERAPY/

28 didgeridoo\*.tw,kf,ot.

29 13 or 14 or 15 or 16 or 17 or 18 or 19 or 20 or 21 or 24 or 25 or 26 or 27 or  
28

30 12 and 29

31 meta analysis.mp.

32 meta analysis.pt.

33 review.pt.

34 search\*.tw.

35 or/31-34

36 exp CLINICAL PATHWAY/

37 exp CLINICAL PROTOCOL/

38 exp CONSENSUS/

39 exp CONSENSUS DEVELOPMENT CONFERENCE/

40 exp CONSENSUS DEVELOPMENT CONFERENCES AS TOPIC/

41 CRITICAL PATHWAYS/

42 exp GUIDELINE/  
43 GUIDELINES AS TOPIC/  
44 exp PRACTICE GUIDELINE/  
45 PRACTICE GUIDELINES AS TOPIC/  
46 HEALTH PLANNING GUIDELINES/  
47 (guideline or practice guideline or consensus development conference or  
consensus development conference, NIH).pt.  
48 (position statement\* or policy statement\* or practice parameter\* or best  
practice\*).ti,ab,kf,kw.  
49 (standards or guideline or guidelines).ti,kf,kw.  
50 ((practice or treatment\* or clinical) adj guideline\*).ab.  
51 (CPG or CPGs).ti.  
52 consensus\*.ti,kf,kw.  
53 consensus\*.ab. /freq=2  
54 ((critical or clinical or practice) adj2 (path or paths or pathway or pathways or  
protocol)).ti,ab,kf,kw.  
55 recommendat\*.ti,kf,kw.  
56 (care adj2 (standard or path or paths or pathway or pathways or map or  
maps or plan or plans)).ti,ab,kf,kw.  
57 (algorithm\* adj2 (screening or examination or test or tested or testing or  
assessment\* or diagnosis or diagnoses or diagnosed or  
diagnosing)).ti,ab,kf,kw.  
58 (algorithm\* adj2 (pharmacotherap\* or chemotherap\* or chemotreatment\* or  
therap\* or treatment\* or intervention\*)).ti,ab,kf,kw.  
59 or/36-58  
60 randomized controlled trial.pt.  
61 controlled clinical trial.pt.  
62 randomi?ed.ab.  
63 placebo.ab.  
64 drug therapy.fs.  
65 randomly.ab.  
66 trial.ab.  
67 groups.ab.

68 or/60-67  
69 exp ANIMALS/ not HUMANS/  
70 30 and (35 or 59 or 70)

**Medline (Ovid) search strategy:**

# Searches  
1 SLEEP APNOEA SYNDROMES/  
2 exp SLEEP APNOEA, OBSTRUCTIVE/  
3 ((apnoea\* or apnoea\*) adj3 sleep\*).tw,kf,ot.  
4 (hypopnoea\* or hypopnoea\* or obstructive\*).tw,kf,ot.  
5 3 and 4  
6 (OSA or OSAS or OSAHS or SHS or SAHS).tw,kf,ot.  
7 1 or 2 or 3 or 5 or 6  
8 SNORING/  
9 snoring\*.tw,kf,ot.  
10 upper airway resistance syndrome\*.tw.  
11 or/8-10  
12 7 or 11  
13 MYOFUNCTIONAL THERAPY/  
14 myofunctional\*.tw,kf,ot.  
15 (myo-therap\* or myotherap\*).tw,kf,ot.  
16 (myolog\* adj3 (oro-facial\* or orofacial\*)).tw,kf,ot.  
17 (oropharyngeal\* or oropharingeal\* or orofaringeal\*).tw,kf,ot.  
18 myofacial reeducation\*.tw,kf,ot.  
19 (upper airway adj3 (exercise\* or remodeling\*)).tw,kf,ot.  
20 SPEECH THERAPY/  
21 speech therap\*.tw,kf,ot.

22 EXERCISE THERAPY/  
23 TONGUE/  
24 22 and 23  
25 ((pharyngeal\* or pharyngeal\*) adj3 (muscle\* or musculatur\*)).tw,kf,ot.  
26 (tongue\* adj3 (task\* or exercise\*)).tw,kf,ot.  
27 MUSIC THERAPY/  
28 didgeridoo\*.tw,kf,ot.  
29 13 or 14 or 15 or 16 or 17 or 18 or 19 or 20 or 21 or 24 or 25 or 26 or 27 or  
28  
30 12 and 29  
31 meta analysis.mp.  
32 meta analysis.pt.  
33 review.pt.  
34 search\*.tw.  
35 or/31-34  
36 exp CLINICAL PATHWAY/  
37 exp CLINICAL PROTOCOL/  
38 exp CONSENSUS/  
39 exp CONSENSUS DEVELOPMENT CONFERENCE/  
40 exp CONSENSUS DEVELOPMENT CONFERENCES AS TOPIC/  
41 CRITICAL PATHWAYS/  
42 exp GUIDELINE/  
43 GUIDELINES AS TOPIC/  
44 exp PRACTICE GUIDELINE/  
45 PRACTICE GUIDELINES AS TOPIC/  
46 HEALTH PLANNING GUIDELINES/  
47 (guideline or practice guideline or consensus development conference or  
consensus development conference, NIH).pt.  
48 (position statement\* or policy statement\* or practice parameter\* or best  
practice\*).ti,ab,kf,kw.  
49 (standards or guideline or guidelines).ti,kf,kw.  
50 ((practice or treatment\* or clinical) adj guideline\*).ab.

- 51 (CPG or CPGs).ti.
- 52 consensus\*.ti,kf,kw.
- 53 consensus\*.ab. /freq=2
- 54 ((critical or clinical or practice) adj2 (path or paths or pathway or pathways or protocol\*)).ti,ab,kf,kw.
- 55 recommendat\*.ti,kf,kw.
- 56 (care adj2 (standard or path or paths or pathway or pathways or map or maps or plan or plans)).ti,ab,kf,kw.
- 57 (algorithm\* adj2 (screening or examination or test or tested or testing or assessment\* or diagnosis or diagnoses or diagnosed or diagnosing)).ti,ab,kf,kw.
- 58 (algorithm\* adj2 (pharmacotherap\* or chemotherap\* or chemotreatment\* or therap\* or treatment\* or intervention\*)).ti,ab,kf,kw.
- 59 or/36-58
- 60 randomized controlled trial.pt.
- 61 controlled clinical trial.pt.
- 62 randomi?ed.ab.
- 63 placebo.ab.
- 64 drug therapy.fs.
- 65 randomly.ab.
- 66 trial.ab.
- 67 groups.ab.
- 68 or/60-67
- 69 exp ANIMALS/ not HUMANS/
- 70 30 and (35 or 59 or 70)



## GRADE evidence profiles and evidence-to-decision frameworks

Table e11: PICO 1

### QUESTION

**Should Laparoscopic Roux-en-Y gastric bypass surgery or weight reducing diet be used for adult obese patients with obstructive sleep apnoea?**

|                               |                                                                                                                                                            |
|-------------------------------|------------------------------------------------------------------------------------------------------------------------------------------------------------|
| <b>POPULATION:</b>            | Adult obese patients with obstructive sleep apnoea.                                                                                                        |
| <b>INTERVENTION:</b>          | Laparoscopic Roux-en-Y gastric bypass surgery.                                                                                                             |
| <b>COMPARISON:</b>            | Weight reducing diet.                                                                                                                                      |
| <b>MAIN OUTCOMES:</b>         | Apnoea-Hypopnoea-Index; Sleep efficiency; Health-related quality of life; Sleepiness; Hypertension; Compliance; Adverse events (only listed for each arm). |
| <b>SETTING:</b>               |                                                                                                                                                            |
| <b>PERSPECTIVE:</b>           |                                                                                                                                                            |
| <b>BACKGROUND:</b>            |                                                                                                                                                            |
| <b>CONFLICT OF INTERESTS:</b> |                                                                                                                                                            |

### ASSESSMENT

| <b>Problem</b><br>Is the problem a priority?                                                                                           |                                                                                                                                                                                                                                                                                                                        |                                                                                       |
|----------------------------------------------------------------------------------------------------------------------------------------|------------------------------------------------------------------------------------------------------------------------------------------------------------------------------------------------------------------------------------------------------------------------------------------------------------------------|---------------------------------------------------------------------------------------|
| <b>JUDGEMENT</b>                                                                                                                       | <b>RESEARCH EVIDENCE</b>                                                                                                                                                                                                                                                                                               | <b>ADDITIONAL CONSIDERATIONS</b>                                                      |
| <ul style="list-style-type: none"> <li>○ No</li> <li>○ Probably no</li> <li>○ Probably yes</li> <li>● Yes</li> <li>○ Varies</li> </ul> | <p>There is an increasing evidence of obesity, associated with increasing risk of OSA. Weight reduction is mandatory to treat the underlying cause. Despite dietary interventions, bariatric surgery is increasingly popular. Thus, the question arises if gastric bypass surgery is as effective as CPAP therapy.</p> | <p>The technique of Roux-en-Y surgery is the most frequently performed procedure.</p> |

| <ul style="list-style-type: none"> <li>○ Don't know</li> </ul>                                                                                            |                                                                                                                                                                                                                                                                                                                                                                                                                                                                                                                                          |                                                                                                                                                                                                                                                                                                                                       |
|-----------------------------------------------------------------------------------------------------------------------------------------------------------|------------------------------------------------------------------------------------------------------------------------------------------------------------------------------------------------------------------------------------------------------------------------------------------------------------------------------------------------------------------------------------------------------------------------------------------------------------------------------------------------------------------------------------------|---------------------------------------------------------------------------------------------------------------------------------------------------------------------------------------------------------------------------------------------------------------------------------------------------------------------------------------|
| <h2 style="margin: 0;">Desirable Effects</h2> <p style="margin: 0;">How substantial are the desirable anticipated effects?</p>                            |                                                                                                                                                                                                                                                                                                                                                                                                                                                                                                                                          |                                                                                                                                                                                                                                                                                                                                       |
| JUDGEMENT                                                                                                                                                 | RESEARCH EVIDENCE                                                                                                                                                                                                                                                                                                                                                                                                                                                                                                                        | ADDITIONAL CONSIDERATIONS                                                                                                                                                                                                                                                                                                             |
| <ul style="list-style-type: none"> <li>○ Trivial</li> <li>● Small</li> <li>○ Moderate</li> <li>○ Large</li> <li>○ Varies</li> <li>○ Don't know</li> </ul> | <p>Compared to weight reducing diet, impact of gastric banding on AHI, sleep quality and sleepiness is small and non-significant. However, health-related quality of life improved 3.5 points more on the SF-36 physical scale after gastric banding.</p> <p><i>See Appendix 1.</i></p>                                                                                                                                                                                                                                                  | <p>Reviewed the beneficial outcomes and the panel determine the benefit to be small.</p> <p>Some concern with the length of follow-up.</p> <p>Because of the patient population - in real life - may expect to see less success with the weight reducing group.</p> <p>Need longer-term studies on outcomes from surgery studies.</p> |
| <h2 style="margin: 0;">Undesirable Effects</h2> <p style="margin: 0;">How substantial are the undesirable anticipated effects?</p>                        |                                                                                                                                                                                                                                                                                                                                                                                                                                                                                                                                          |                                                                                                                                                                                                                                                                                                                                       |
| JUDGEMENT                                                                                                                                                 | RESEARCH EVIDENCE                                                                                                                                                                                                                                                                                                                                                                                                                                                                                                                        | ADDITIONAL CONSIDERATIONS                                                                                                                                                                                                                                                                                                             |
| <ul style="list-style-type: none"> <li>○ Large</li> <li>○ Moderate</li> <li>○ Small</li> <li>● Trivial</li> <li>○ Varies</li> <li>○ Don't know</li> </ul> | <p>Intervention: serious (leading to direct hospitalisation): 5 in 5 participants, Acute LAGB pouch dilatation requiring surgical repositioning (1); Pneumonia (1); Acute cholecystitis with pancreatitis (1); Strangulated umbilical hernia (1); Duodenal Ulcer (1); Severe headaches (1).</p> <p>Control: serious (leading to direct hospitalisation) 5 in 5 participants, Chest pain – angina (1); Cardiac and renal failure; (1); Acute abdomen (1) Peri-anal abscess and fistula (1); Asthma (1).</p> <p><i>See Appendix 1.</i></p> | <p>Adverse events - concern if any occurred within the 4 patients that switched to the control arm.</p> <p>Determined to be trivial - many SAEs not related to the surgical intervention.</p>                                                                                                                                         |
| <h2 style="margin: 0;">Certainty of evidence</h2> <p style="margin: 0;">What is the overall certainty of the evidence of effects?</p>                     |                                                                                                                                                                                                                                                                                                                                                                                                                                                                                                                                          |                                                                                                                                                                                                                                                                                                                                       |
| JUDGEMENT                                                                                                                                                 | RESEARCH EVIDENCE                                                                                                                                                                                                                                                                                                                                                                                                                                                                                                                        | ADDITIONAL CONSIDERATIONS                                                                                                                                                                                                                                                                                                             |

|                                                                                                                                                |                           |                                                                    |
|------------------------------------------------------------------------------------------------------------------------------------------------|---------------------------|--------------------------------------------------------------------|
| <ul style="list-style-type: none"> <li>● Very low</li> <li>○ Low</li> <li>○ Moderate</li> <li>○ High</li> <li>○ No included studies</li> </ul> | The evidence is very low. | Based on very low certainty of evidence for the critical outcomes. |
|------------------------------------------------------------------------------------------------------------------------------------------------|---------------------------|--------------------------------------------------------------------|

**Values**  
Is there important uncertainty about or variability in how much people value the main outcomes?

| JUDGEMENT                                                                                                                                                                                                                                                        | RESEARCH EVIDENCE                               | ADDITIONAL CONSIDERATIONS                                                                                                                                                                                                                                                                                                                                                                                         |
|------------------------------------------------------------------------------------------------------------------------------------------------------------------------------------------------------------------------------------------------------------------|-------------------------------------------------|-------------------------------------------------------------------------------------------------------------------------------------------------------------------------------------------------------------------------------------------------------------------------------------------------------------------------------------------------------------------------------------------------------------------|
| <ul style="list-style-type: none"> <li>○ Important uncertainty or variability</li> <li>● Possibly important uncertainty or variability</li> <li>○ Probably no important uncertainty or variability</li> <li>○ No important uncertainty or variability</li> </ul> | We did not look for evidence on patient values. | <p>Perhaps some trade off between the beneficial outcomes related to symptoms.</p> <p>Excessive daytime sleepiness/symptoms - more willing to accept surgical intervention and related adverse events.</p> <p>Perhaps variability introduced by age, occupation, severity of underlying condition, comorbidities.</p> <p>Severe symptoms - less uncertainty.</p> <p>Minimally symptomatic - more uncertainty.</p> |

**Balance of effects**  
Does the balance between desirable and undesirable effects favour the intervention or the comparison?

| JUDGEMENT                                                                                                                                                                                                                                                                                                      | RESEARCH EVIDENCE                                                                                                                                                                                                                                | ADDITIONAL CONSIDERATIONS                                                                                                                                                                                                                                                                                                                                                                                                                                            |
|----------------------------------------------------------------------------------------------------------------------------------------------------------------------------------------------------------------------------------------------------------------------------------------------------------------|--------------------------------------------------------------------------------------------------------------------------------------------------------------------------------------------------------------------------------------------------|----------------------------------------------------------------------------------------------------------------------------------------------------------------------------------------------------------------------------------------------------------------------------------------------------------------------------------------------------------------------------------------------------------------------------------------------------------------------|
| <ul style="list-style-type: none"> <li>○ Favors the comparison</li> <li>○ Probably favors the comparison</li> <li>○ Does not favor either the intervention or the comparison</li> <li>● Probably favors the intervention</li> <li>○ Favors the intervention</li> <li>○ Varies</li> <li>○ Don't know</li> </ul> | Direct evidence shows the desirable effects to be small, and there were some concerns regarding long-term outcome. Undesirable effects were considered trivial, since many serious adverse events were not related to the surgical intervention. | <p>Very low certainty - possibly important uncertainty</p> <p>The trial with gastric banding versus CPAP may underestimate the benefit of an intervention with gastric bypass surgery. Additional evidence is needed to demonstrate sustained benefit from gastric bypass surgery &amp; weight loss diet**</p> <p>Overall, weight-loss is less after gastric banding than after other bariatric procedures, which argues to perform bariatric surgery type RYGB.</p> |

**Resources required**  
How large are the resource requirements (costs)?

| JUDGEMENT                                                                                                                                                                                                                      | RESEARCH EVIDENCE                          | ADDITIONAL CONSIDERATIONS                                                                                        |
|--------------------------------------------------------------------------------------------------------------------------------------------------------------------------------------------------------------------------------|--------------------------------------------|------------------------------------------------------------------------------------------------------------------|
| <ul style="list-style-type: none"> <li>○ Large costs</li> <li>○ Moderate costs</li> <li>○ Negligible costs and savings</li> <li>○ Moderate savings</li> <li>○ Large savings</li> <li>● Varies</li> <li>○ Don't know</li> </ul> | We did not look for evidence on resources. | <p>It is difficult to compare the cost within Europe.</p> <p>Coverage varies across patients/countries, etc.</p> |

**Certainty of evidence of required resources**  
 What is the certainty of the evidence of resource requirements (costs)?

| JUDGEMENT                                                                                                                                      | RESEARCH EVIDENCE                          | ADDITIONAL CONSIDERATIONS |
|------------------------------------------------------------------------------------------------------------------------------------------------|--------------------------------------------|---------------------------|
| <ul style="list-style-type: none"> <li>○ Very low</li> <li>○ Low</li> <li>○ Moderate</li> <li>○ High</li> <li>● No included studies</li> </ul> | We did not look for evidence on resources. |                           |

**Cost effectiveness**  
 Does the cost-effectiveness of the intervention favor the intervention or the comparison?

| JUDGEMENT                                                                                                                                                                                                                                                                                                               | RESEARCH EVIDENCE                                   | ADDITIONAL CONSIDERATIONS |
|-------------------------------------------------------------------------------------------------------------------------------------------------------------------------------------------------------------------------------------------------------------------------------------------------------------------------|-----------------------------------------------------|---------------------------|
| <ul style="list-style-type: none"> <li>○ Favors the comparison</li> <li>○ Probably favors the comparison</li> <li>○ Does not favor either the intervention or the comparison</li> <li>○ Probably favors the intervention</li> <li>○ Favors the intervention</li> <li>○ Varies</li> <li>● No included studies</li> </ul> | We did not look for evidence on cost-effectiveness. |                           |

**Equity**  
 What would be the impact on health equity?

| JUDGEMENT | RESEARCH EVIDENCE | ADDITIONAL CONSIDERATIONS |
|-----------|-------------------|---------------------------|
|           |                   |                           |

|                                                                                                                                                                                                                  |                                         |                                                                          |
|------------------------------------------------------------------------------------------------------------------------------------------------------------------------------------------------------------------|-----------------------------------------|--------------------------------------------------------------------------|
| <ul style="list-style-type: none"> <li>○ Reduced</li> <li>● Probably reduced</li> <li>○ Probably no impact</li> <li>○ Probably increased</li> <li>○ Increased</li> <li>○ Varies</li> <li>○ Don't know</li> </ul> | We did not look for evidence on equity. | Reimbursement may not be possible and make intervention less attainable. |
|------------------------------------------------------------------------------------------------------------------------------------------------------------------------------------------------------------------|-----------------------------------------|--------------------------------------------------------------------------|

### Acceptability

Is the intervention acceptable to key stakeholders?

| JUDGEMENT                                                                                                                                                    | RESEARCH EVIDENCE                              | ADDITIONAL CONSIDERATIONS                                                                                                                                                   |
|--------------------------------------------------------------------------------------------------------------------------------------------------------------|------------------------------------------------|-----------------------------------------------------------------------------------------------------------------------------------------------------------------------------|
| <ul style="list-style-type: none"> <li>○ No</li> <li>○ Probably no</li> <li>○ Probably yes</li> <li>● Yes</li> <li>○ Varies</li> <li>○ Don't know</li> </ul> | We did not look for evidence on acceptability. | This intervention is acceptable for clinicians. On the other hand, there is some variability in acceptability for patients. However, mostly the intervention is acceptable. |

### Feasibility

Is the intervention feasible to implement?

| JUDGEMENT                                                                                                                                                    | RESEARCH EVIDENCE                            | ADDITIONAL CONSIDERATIONS                  |
|--------------------------------------------------------------------------------------------------------------------------------------------------------------|----------------------------------------------|--------------------------------------------|
| <ul style="list-style-type: none"> <li>○ No</li> <li>○ Probably no</li> <li>● Probably yes</li> <li>○ Yes</li> <li>○ Varies</li> <li>○ Don't know</li> </ul> | We did not look for evidence on feasibility. | There is some variability in availability. |

## SUMMARY OF JUDGEMENTS

|                   | JUDGEMENT |             |              |       |  |        |            |
|-------------------|-----------|-------------|--------------|-------|--|--------|------------|
| PROBLEM           | No        | Probably no | Probably yes | Yes   |  | Varies | Don't know |
| DESIRABLE EFFECTS | Trivial   | Small       | Moderate     | Large |  | Varies | Don't know |

## JUDGEMENT

|                                                    |                                      |                                                      |                                                          |                                         |                         |               |                            |
|----------------------------------------------------|--------------------------------------|------------------------------------------------------|----------------------------------------------------------|-----------------------------------------|-------------------------|---------------|----------------------------|
| <b>UNDESIRABLE EFFECTS</b>                         | Large                                | Moderate                                             | Small                                                    | <b>Trivial</b>                          |                         | Varies        | Don't know                 |
| <b>CERTAINTY OF EVIDENCE</b>                       | <b>Very low</b>                      | Low                                                  | Moderate                                                 | High                                    |                         |               | No included studies        |
| <b>VALUES</b>                                      | Important uncertainty or variability | <b>Possibly important uncertainty or variability</b> | Probably no important uncertainty or variability         | No important uncertainty or variability |                         |               |                            |
| <b>BALANCE OF EFFECTS</b>                          | Favors the comparison                | Probably favors the comparison                       | Does not favor either the intervention or the comparison | <b>Probably favors the intervention</b> | Favors the intervention | Varies        | Don't know                 |
| <b>RESOURCES REQUIRED</b>                          | Large costs                          | Moderate costs                                       | Negligible costs and savings                             | Moderate savings                        | Large savings           | <b>Varies</b> | Don't know                 |
| <b>CERTAINTY OF EVIDENCE OF REQUIRED RESOURCES</b> | Very low                             | Low                                                  | Moderate                                                 | High                                    |                         |               | <b>No included studies</b> |
| <b>COST EFFECTIVENESS</b>                          | Favors the comparison                | Probably favors the comparison                       | Does not favor either the intervention or the comparison | Probably favors the intervention        | Favors the intervention | Varies        | <b>No included studies</b> |
| <b>EQUITY</b>                                      | Reduced                              | <b>Probably reduced</b>                              | Probably no impact                                       | Probably increased                      | Increased               | Varies        | Don't know                 |
| <b>ACCEPTABILITY</b>                               | No                                   | Probably no                                          | Probably yes                                             | <b>Yes</b>                              |                         | Varies        | Don't know                 |
| <b>FEASIBILITY</b>                                 | No                                   | Probably no                                          | <b>Probably yes</b>                                      | Yes                                     |                         | Varies        | Don't know                 |

## TYPE OF RECOMMENDATION

|                                                                         |                                                                              |                                                                                                   |                                                                                            |                                                                     |
|-------------------------------------------------------------------------|------------------------------------------------------------------------------|---------------------------------------------------------------------------------------------------|--------------------------------------------------------------------------------------------|---------------------------------------------------------------------|
| Strong recommendation against the intervention<br><input type="radio"/> | Conditional recommendation against the intervention<br><input type="radio"/> | Conditional recommendation for either the intervention or the comparison<br><input type="radio"/> | <b>Conditional recommendation for the intervention</b><br><input checked="" type="radio"/> | Strong recommendation for the intervention<br><input type="radio"/> |
|-------------------------------------------------------------------------|------------------------------------------------------------------------------|---------------------------------------------------------------------------------------------------|--------------------------------------------------------------------------------------------|---------------------------------------------------------------------|

## CONCLUSIONS

Recommendation

In adult obese patients with OSA, we suggest bariatric surgery evaluation or weight reducing diet when weight has not improved despite participating in a comprehensive weight reduction program and if no contraindications (conditional recommendation, very low certainty of evidence).

Comorbidities should be considered when making surgical decisions (in favor or against).

Patients' values and preference may weigh heavily in their decision for surgery/against surgery.

## Justification

There was no RCT on RYGB available in OSA patients. The described study did not exactly match our PICO question (only included gastric banding), so that there is only indirect evidence for this PICO. Based on the presented RCT with evidence to use gastric banding surgery as an intervention, the panel determined the benefit to be small, and there were some concerns regarding long-term outcome. Side effects were considered trivial, since many serious adverse events were not related to the surgical intervention. Given overall weight loss is less after gastric banding than after other bariatric procedures, the panel proposes to perform bariatric surgery type RYGB.

Very low certainty of evidence was given due to concerns about imprecision (only 60 patients included, compliance only described for intervention arm) and high risk of bias (unblinded study design and subjectively reported outcomes).

## Subgroup considerations

The beneficial outcomes have to be balanced related to symptoms. In case of excessive daytime sleepiness or other symptoms, patients may be more willing to accept surgical intervention and related adverse events. In addition, variability could be introduced by age, occupation, severity of the underlying condition and comorbidities.

## Implementation considerations

The intervention is usually acceptable for clinicians, and is mostly acceptable for patients. For health insurers, this depends on the clinical situation.

## Monitoring and evaluation

For reassessment, a follow-up poly(somno)graphy should be considered one year after the intervention. This has to be balanced versus the weight reduction obtained and dependency on CPAP therapy.

## Research priorities

More RCT studies in adult obese patients with OSA are warranted to demonstrate sustained benefit from surgery and weight reducing diet on AHI, blood pressure, sleepiness and compliance.

## PICO 1 APPENDICES

### PICO 1 Appendix 1

| Outcomes                                                                                                                   | Anticipated absolute effects <sup>†</sup> (95% CI)             |                                                            | Relative effect (95% CI) | № of participants (studies) | Certainty of the evidence (GRADE) | Comments                                                                                                                                                                                                                                                                                                                                                      |
|----------------------------------------------------------------------------------------------------------------------------|----------------------------------------------------------------|------------------------------------------------------------|--------------------------|-----------------------------|-----------------------------------|---------------------------------------------------------------------------------------------------------------------------------------------------------------------------------------------------------------------------------------------------------------------------------------------------------------------------------------------------------------|
|                                                                                                                            | Risk with weight reducing diet                                 | Risk with gastric banding                                  |                          |                             |                                   |                                                                                                                                                                                                                                                                                                                                                               |
| Apnoea-Hypopnoea-Index (AHI) assessed with: Polysomnography Scale from: 0 (best) to higher (worst) follow up: mean 2 years | The mean apnoea-Hypopnoea-Index was <b>43.2</b> events/hour    | mean <b>3.7 events/hour fewer</b> (1.4 fewer to 6.5 fewer) | -                        | 60 (1 RCT)                  | ⊕○○○<br>VERY LOW <sup>a,b</sup>   | Intervention: AHI decreased by 25.5 events/hour (95% CI, 14.2 to 36.7 events/hour) from 65.0 events/hour to 39.5 (28.4 to 50.5) events/hour - - - control: AHI decreased by 14.0 events/hour (95% CI, 3.3 to 24.6 events/hour) from 57.2 events/hour to 43.2 (34.9 to 51.9) events/hour - - - difference between change scores -11.5 (-28.3 to 5.3); p = 0.18 |
| Sleep efficiency assessed with: PSG (%) Scale from: 0 (worst) to 100 (best)                                                | The mean sleep efficiency was <b>72.4 %</b>                    | mean <b>7.4 % higher</b> (4.2 higher to 10.5 higher)       | -                        | 60 (1 RCT)                  | ⊕○○○<br>VERY LOW <sup>a,b</sup>   | Intervention: 2 year score: 79.8 % (75.8 to 83.8) / change 1.6 % (-3.4 to 6.6) - - - control: 2 year score: 72.4 % (65.3 to 79.6) / change -3.04 (-9.7 to 3.7) - - - difference between change scores: 4.7 % (-4.6 to 13.9); p = 0.32                                                                                                                         |
| Health-related quality of life assessed with: SF-36 physical Scale from: 0 (worst) to 100 (best) follow up: mean 2 years   | The mean health-related quality of life was <b>44.5</b> points | mean <b>3.5 points more</b> (3.1 more to 3.8 more)         | -                        | 60 (1 RCT)                  | ⊕○○○<br>VERY LOW <sup>a,b,c</sup> | Intervention: 2-year score: 48.0 (43.9 to 52.1) / change at 2 years +12.6 (7.3 to 17.9) - - - control: 2-year score: 44.5 (40.1 to 49.0) / change at 2 years 3.4 (-1.6 to 8.4)- - - difference between change scores 9.3 (0.5 to 18.0); p = 0.04 favouring intervention arm                                                                                   |
| Sleepiness (ESS) assessed with: Epworth Sleepiness Scale                                                                   | The mean sleepiness was <b>8.8</b> points                      | mean <b>2.4 points lower</b> (1.8 lower to 2.9 lower)      | -                        | 60 (1 RCT)                  | ⊕○○○<br>VERY LOW <sup>a,b,c</sup> | Intervention: 2 year score: 6.4 (4.7 to 8.1) / change at 2 years -6.8 (-9.4 to -4.2) - - - control: 2 year score: 8.8 (6.5 to 11.0) / change at 2 years -3.6 (-6.0 to -1.2) - - - P = 0.12                                                                                                                                                                    |



| Outcomes                                                      | Anticipated absolute effects <sup>†</sup> (95% CI)                                                                                                                                                                                                                                                                                                                                                                                                                                                                                                                                                                                                                                                                                                                                                                                                                                                                                                                                                                           |                           | Relative effect (95% CI) | № of participants (studies) | Certainty of the evidence (GRADE) | Comments |
|---------------------------------------------------------------|------------------------------------------------------------------------------------------------------------------------------------------------------------------------------------------------------------------------------------------------------------------------------------------------------------------------------------------------------------------------------------------------------------------------------------------------------------------------------------------------------------------------------------------------------------------------------------------------------------------------------------------------------------------------------------------------------------------------------------------------------------------------------------------------------------------------------------------------------------------------------------------------------------------------------------------------------------------------------------------------------------------------------|---------------------------|--------------------------|-----------------------------|-----------------------------------|----------|
|                                                               | Risk with weight reducing diet                                                                                                                                                                                                                                                                                                                                                                                                                                                                                                                                                                                                                                                                                                                                                                                                                                                                                                                                                                                               | Risk with gastric banding |                          |                             |                                   |          |
| Scale from: 0 (best) to 24 (worst)<br>follow up: mean 2 years |                                                                                                                                                                                                                                                                                                                                                                                                                                                                                                                                                                                                                                                                                                                                                                                                                                                                                                                                                                                                                              |                           |                          |                             |                                   |          |
| Hypertension                                                  | baseline - intervention group: 15/50 - control group: 17/57 --- intervention: 2-year score syst. 130.1 mmHg (124 to 137) change score: -7.25 (-15.9 to 0.69) - - - control: 2-year score syst. 136 (131 to 142) change score: -5.9 (-12.1 to 0.34) - - - difference between change scores (syst.): -1.4 (-11.7 to 9.0) p = 0.80 - - - intervention: 2-year score diast. 82.0 mmHg (78.4 to 85.7) change score -1.1(-5.1 to 3.0) - - - control: 2-year score diast. 83.3 (79.4 to 87.1) change score: -3.5 (-8.2 to 1.2) - - - difference between change scores: 2.4 (-4.6 to 9.4) p = 0.375                                                                                                                                                                                                                                                                                                                                                                                                                                  |                           | -                        | 60 (1 RCT)                  | ⊕○○○<br>VERY LOW <sup>a,b</sup>   |          |
| Compliance                                                    | "In the surgical group, 4 participants did not consent to surgery but continued in the study and received conventional therapy" - - - CPAP adherence: no difference between groups                                                                                                                                                                                                                                                                                                                                                                                                                                                                                                                                                                                                                                                                                                                                                                                                                                           |                           | -                        | 60 (1 RCT)                  | ⊕○○○<br>VERY LOW <sup>a,c,d</sup> |          |
| Adverse events (only listed for each arm)                     | intervention: serious (leading to direct hospitalisation): 5 in 5 participants, Acute LAGB pouch dilatation requiring surgical repositioning (1); Pneumonia (1); Acute cholecystitis with pancreatitis (1); Strangulated umbilical hernia (1); Duodenal Ulcer (1); Severe headaches (1); - - - minor: 16 in 12 participants, Elective arthroplasties (2), Shoulder (1), hip (1); LAGB replacement (1); Spinal stimulator placement for pain (1); Nasal surgery (1); Knee reconstruction (1); Knee pain (1); Shoulder pain (2); Back Pain (1); Syncope episode (dehydration) (1); Epilepsy (1) - - - control: serious (leading to direct hospitalisation)5 in 5 participants, Chest pain – angina (1); Cardiac and renal failure; (1); Acute abdomen (1) Peri-anal abscess and fistula (1); Asthma (1); - - - minor: 11 in 9, Hand surgery (1); Heel surgery (1); Joint pain (3); Back (1), shoulder (1); knee (1); Kidney stone (1); Diarrhea with very low calorie diet (1); Depression (1); Cold, Flu & sinusitis (3 in 3) |                           | -                        | 60 (1 RCT)                  | ⊕○○○<br>VERY LOW <sup>a,b</sup>   |          |

- a. Downgraded one for indirectness: trial does not evaluate Roux-en-Y gastric bypass but gastric banding.
- b. Downgraded two for imprecision: only 60 participants included.
- c. Downgraded one for study limitations: outcomes are self-reported, 2 domains high risk of bias (performance bias and detection bias due to unblinded study design and subjectively reported outcomes).
- d. Downgraded two for imprecision: only 60 participants included; only described for intervention arm, compliance of control treatment not reported.

## PICO 1 Appendix 2

| Outcomes                                                                                                                          | Importance | Certainty of the evidence (GRADE) |
|-----------------------------------------------------------------------------------------------------------------------------------|------------|-----------------------------------|
| Apnoea-Hypopnoea-Index<br>assessed with: Polysomnography<br>Scale from: 0 (best) to higher (worst)<br>follow up: mean 2 years     | CRITICAL   | ⊕○○○<br>VERY LOW <sup>a,b</sup>   |
| Sleep efficiency<br>assessed with: PSG (%)<br>Scale from: 0 (worst) to 100 (best)                                                 | CRITICAL   | ⊕○○○<br>VERY LOW <sup>a,b</sup>   |
| Health-related quality of life<br>assessed with: SF-36 physical<br>Scale from: 0 (worst) to 100 (best)<br>follow up: mean 2 years | CRITICAL   | ⊕○○○<br>VERY LOW <sup>a,b,c</sup> |
| Sleepiness<br>assessed with: Epworth Sleepiness Scale<br>Scale from: 0 (best) to 24 (worst)<br>follow up: mean 2 years            | CRITICAL   | ⊕○○○<br>VERY LOW <sup>a,b,c</sup> |
| Hypertension                                                                                                                      | CRITICAL   | ⊕○○○<br>VERY LOW <sup>a,b</sup>   |
| Compliance                                                                                                                        | CRITICAL   | ⊕○○○<br>VERY LOW <sup>a,c,d</sup> |
| Adverse events (only listed for each arm)                                                                                         | CRITICAL   | ⊕○○○<br>VERY LOW <sup>a,b</sup>   |

a. Downgraded one for indirectness: trial does not evaluate Roux-en-Y gastric bypass but gastric banding.

b. Downgraded two for imprecision: only 60 participants included.

c. Downgraded one for study limitations: outcomes are self-reported, 2 domains high risk of bias (performance bias and detection bias due to unblinded study design and subjectively reported outcomes).

d. Downgraded two for imprecision: only 60 participants included; only described for intervention arm, compliance of control treatment not reported

**Table e12: PICO 2**

## QUESTION

**Should a custom made dual-block mandibular advancement device or CPAP be used for adult patients with obstructive sleep apnoea?**

|                               |                                                                                                                                                                                                                                                                                                                                                                    |
|-------------------------------|--------------------------------------------------------------------------------------------------------------------------------------------------------------------------------------------------------------------------------------------------------------------------------------------------------------------------------------------------------------------|
| <b>POPULATION:</b>            | Adult patients with obstructive sleep apnoea.                                                                                                                                                                                                                                                                                                                      |
| <b>INTERVENTION:</b>          | Custom made dual-block mandibular advancement device.                                                                                                                                                                                                                                                                                                              |
| <b>COMPARISON:</b>            | CPAP.                                                                                                                                                                                                                                                                                                                                                              |
| <b>MAIN OUTCOMES:</b>         | Apnoea-hypopnoea index (events/h); Sleep efficiency %; <3% and <4% oxygen desaturation (events/h); Sleepiness ESS; Physical functioning; Arterial hypertension - 24h systolic blood pressure; Arterial hypertension - 24h diastolic blood pressure; Nighttime systolic blood pressure; Nighttime diastolic blood pressure; Adherence / Compliance; Adverse events. |
| <b>SETTING:</b>               |                                                                                                                                                                                                                                                                                                                                                                    |
| <b>PERSPECTIVE:</b>           |                                                                                                                                                                                                                                                                                                                                                                    |
| <b>BACKGROUND:</b>            |                                                                                                                                                                                                                                                                                                                                                                    |
| <b>CONFLICT OF INTERESTS:</b> |                                                                                                                                                                                                                                                                                                                                                                    |

## ASSESSMENT

| <b>Problem</b>                                                                                                                                               |                                                                                                                                                                                                                                                                               |                                                                                                                                                     |
|--------------------------------------------------------------------------------------------------------------------------------------------------------------|-------------------------------------------------------------------------------------------------------------------------------------------------------------------------------------------------------------------------------------------------------------------------------|-----------------------------------------------------------------------------------------------------------------------------------------------------|
| Is the problem a priority?                                                                                                                                   |                                                                                                                                                                                                                                                                               |                                                                                                                                                     |
| <b>JUDGEMENT</b>                                                                                                                                             | <b>RESEARCH EVIDENCE</b>                                                                                                                                                                                                                                                      | <b>ADDITIONAL CONSIDERATIONS</b>                                                                                                                    |
| <ul style="list-style-type: none"> <li>○ No</li> <li>○ Probably no</li> <li>○ Probably yes</li> <li>● Yes</li> <li>○ Varies</li> <li>○ Don't know</li> </ul> | <p>There is an increasing group of patients treated with mandibular advancement therapy. Some national scientific societies recommend the use of MADs as an alternative (first or second line) to CPAP. Therefore, a formal European recommendation is urgently required.</p> | <p>It is of interest not only to focus on AHI, but also on other outcome parameters, including quality of life, comorbidities, and oxygenation.</p> |

## Desirable Effects

How substantial are the desirable anticipated effects?

| JUDGEMENT                                                                                                                                                 | RESEARCH EVIDENCE                                                                                                                                                                                                                                                                                | ADDITIONAL CONSIDERATIONS                                                                                                                                                                                                         |
|-----------------------------------------------------------------------------------------------------------------------------------------------------------|--------------------------------------------------------------------------------------------------------------------------------------------------------------------------------------------------------------------------------------------------------------------------------------------------|-----------------------------------------------------------------------------------------------------------------------------------------------------------------------------------------------------------------------------------|
| <ul style="list-style-type: none"> <li>○ Trivial</li> <li>○ Small</li> <li>○ Moderate</li> <li>○ Large</li> <li>○ Varies</li> <li>● Don't know</li> </ul> | <p>Sleep efficiency, ESS and quality of life (SF-36), systolic and diastolic 24-BP did not differ between treatments in the whole group and in all severity subgroups. Similarly, no significant differences were found regarding night-time systolic and diastolic BP's in the whole group.</p> | <p>Difference in compliance and patient preference in favour of MAD. This has moderate to large relevance for patients with moderate sleep apnoea, but smaller relevance for patients with severe apnoea (AHI more relevant).</p> |

## Undesirable Effects

How substantial are the undesirable anticipated effects?

| JUDGEMENT                                                                                                                                                 | RESEARCH EVIDENCE                                                                                                                                                                                                                                                                                                                         | ADDITIONAL CONSIDERATIONS                                                                                                                                                                                                           |
|-----------------------------------------------------------------------------------------------------------------------------------------------------------|-------------------------------------------------------------------------------------------------------------------------------------------------------------------------------------------------------------------------------------------------------------------------------------------------------------------------------------------|-------------------------------------------------------------------------------------------------------------------------------------------------------------------------------------------------------------------------------------|
| <ul style="list-style-type: none"> <li>○ Large</li> <li>○ Moderate</li> <li>● Small</li> <li>○ Trivial</li> <li>○ Varies</li> <li>○ Don't know</li> </ul> | <p>AHI decreased more with CPAP than with MAD among all studied patients. Significant differences in favour of CPAP were found in all severity groups.</p> <p>CPAP had a higher impact on night-time systolic BP in moderate to severe OSA patients and in the study with a mean baseline AHI &gt; 30/h.</p> <p><i>See Appendix 1</i></p> | <p>AHI is especially relevant for patients with severe obstructive sleep apnoea.</p> <p>A significant difference was found for subgroups moderate and severe OSA regarding nighttime blood pressure (small number of patients).</p> |

## Certainty of evidence

What is the overall certainty of the evidence of effects?

| JUDGEMENT                                                                                                                                      | RESEARCH EVIDENCE                               | ADDITIONAL CONSIDERATIONS                                                                                                                                         |
|------------------------------------------------------------------------------------------------------------------------------------------------|-------------------------------------------------|-------------------------------------------------------------------------------------------------------------------------------------------------------------------|
| <ul style="list-style-type: none"> <li>○ Very low</li> <li>● Low</li> <li>○ Moderate</li> <li>○ High</li> <li>○ No included studies</li> </ul> | <p>The overall quality of evidence was low.</p> | <p>There is a lack of long-term RCTs with higher number of patients, including different levels of OSA severity, various comorbidities and weight categories.</p> |

## Values

Is there important uncertainty about or variability in how much people value the main outcomes?

| JUDGEMENT                                                                                                                             | RESEARCH EVIDENCE                                                                                                                                                                                              | ADDITIONAL CONSIDERATIONS                                 |
|---------------------------------------------------------------------------------------------------------------------------------------|----------------------------------------------------------------------------------------------------------------------------------------------------------------------------------------------------------------|-----------------------------------------------------------|
| <ul style="list-style-type: none"> <li>○ Important uncertainty or variability</li> <li>● Possibly important uncertainty or</li> </ul> | <p>The intervention is usually acceptable for clinicians, patients and health insurers. There are huge differences in patients' preferences and knowledge and experience of sleep physicians and dentists.</p> | <p>The prediction of outcome is only partly feasible.</p> |

|                                                                                                                                                        |  |                                                                                                                                                                                                 |
|--------------------------------------------------------------------------------------------------------------------------------------------------------|--|-------------------------------------------------------------------------------------------------------------------------------------------------------------------------------------------------|
| variability<br><input type="radio"/> Probably no important uncertainty or variability<br><input type="radio"/> No important uncertainty or variability |  | There are differences in the recognition and acceptance of the various side-effects.<br><br>Outcome depends on the different devices applied by various actors, also leading to various values. |
|--------------------------------------------------------------------------------------------------------------------------------------------------------|--|-------------------------------------------------------------------------------------------------------------------------------------------------------------------------------------------------|

## Balance of effects

Does the balance between desirable and undesirable effects favor the intervention or the comparison?

| JUDGEMENT                                                                                                                                                                                                                                                                                                                                                                       | RESEARCH EVIDENCE                                                                                                                                                                                                                     | ADDITIONAL CONSIDERATIONS                                                                                                                                                                                                                                                                   |
|---------------------------------------------------------------------------------------------------------------------------------------------------------------------------------------------------------------------------------------------------------------------------------------------------------------------------------------------------------------------------------|---------------------------------------------------------------------------------------------------------------------------------------------------------------------------------------------------------------------------------------|---------------------------------------------------------------------------------------------------------------------------------------------------------------------------------------------------------------------------------------------------------------------------------------------|
| <input type="radio"/> Favors the comparison<br><input checked="" type="radio"/> Probably favors the comparison<br><input type="radio"/> Does not favor either the intervention or the comparison<br><input type="radio"/> Probably favors the intervention<br><input type="radio"/> Favors the intervention<br><input type="radio"/> Varies<br><input type="radio"/> Don't know | CPAP has in general a greater impact on AHI decrease and a higher impact on systolic night-time BP decrease in severe OSA. It is also advantageous with increasing severity of OSA, comorbidities, as well as odontological concerns. | However, in mild and moderate OSA, the AHI under MAD treatment is usually low and close to the normal range. Furthermore, there is some evidence of a better compliance and patient's preference in favour of MAD as compared to CPAP and similar impact on sleepiness and quality of life. |

## Resources required

How large are the resource requirements (costs)?

| JUDGEMENT                                                                                                                                                                                                                                                                                       | RESEARCH EVIDENCE                         | ADDITIONAL CONSIDERATIONS                                                                                                                                                                    |
|-------------------------------------------------------------------------------------------------------------------------------------------------------------------------------------------------------------------------------------------------------------------------------------------------|-------------------------------------------|----------------------------------------------------------------------------------------------------------------------------------------------------------------------------------------------|
| <input type="radio"/> Large costs<br><input type="radio"/> Moderate costs<br><input type="radio"/> Negligible costs and savings<br><input type="radio"/> Moderate savings<br><input type="radio"/> Large savings<br><input checked="" type="radio"/> Varies<br><input type="radio"/> Don't know | We did not look for studies on resources. | There are huge differences between health care systems throughout Europe. There are unique reimbursement strategies. Therefore, no general statements on socioeconomic aspects can be given. |

## Certainty of evidence of required resources

What is the certainty of the evidence of resource requirements (costs)?

| JUDGEMENT                                                                                                                                                                           | RESEARCH EVIDENCE                         | ADDITIONAL CONSIDERATIONS                                                                                                                                                                    |
|-------------------------------------------------------------------------------------------------------------------------------------------------------------------------------------|-------------------------------------------|----------------------------------------------------------------------------------------------------------------------------------------------------------------------------------------------|
| <input type="radio"/> Very low<br><input type="radio"/> Low<br><input type="radio"/> Moderate<br><input type="radio"/> High<br><input checked="" type="radio"/> No included studies | We did not look for studies on resources. | There are huge differences between health care systems throughout Europe. There are unique reimbursement strategies. Therefore, no general statements on socioeconomic aspects can be given. |

## Cost effectiveness

Does the cost-effectiveness of the intervention favor the intervention or the comparison?

| JUDGEMENT                                                                                                                                                                                                                                                                                                               | RESEARCH EVIDENCE                                         | ADDITIONAL CONSIDERATIONS                                                                                                                                                                           |
|-------------------------------------------------------------------------------------------------------------------------------------------------------------------------------------------------------------------------------------------------------------------------------------------------------------------------|-----------------------------------------------------------|-----------------------------------------------------------------------------------------------------------------------------------------------------------------------------------------------------|
| <ul style="list-style-type: none"> <li>○ Favors the comparison</li> <li>○ Probably favors the comparison</li> <li>● Does not favor either the intervention or the comparison</li> <li>○ Probably favors the intervention</li> <li>○ Favors the intervention</li> <li>○ Varies</li> <li>○ No included studies</li> </ul> | <p>We did not look for studies on cost-effectiveness.</p> | <p>There are huge differences between health care systems throughout Europe. There are unique reimbursement strategies. Therefore, no general statements on socioeconomic aspects can be given.</p> |

## Equity

What would be the impact on health equity?

| JUDGEMENT                                                                                                                                                                                                        | RESEARCH EVIDENCE                                    | ADDITIONAL CONSIDERATIONS                                                                                                                                                                                                                                                                                                                                                                                                                      |
|------------------------------------------------------------------------------------------------------------------------------------------------------------------------------------------------------------------|------------------------------------------------------|------------------------------------------------------------------------------------------------------------------------------------------------------------------------------------------------------------------------------------------------------------------------------------------------------------------------------------------------------------------------------------------------------------------------------------------------|
| <ul style="list-style-type: none"> <li>○ Reduced</li> <li>● Probably reduced</li> <li>○ Probably no impact</li> <li>○ Probably increased</li> <li>○ Increased</li> <li>○ Varies</li> <li>○ Don't know</li> </ul> | <p>We did not look for studies on health equity.</p> | <p>The availability of MAD treatment might highly differ between countries due to different healthcare systems, including costs and to different levels of training and interest of dentists to sleep disorders. Indeed, MAD treatment requires a coordinated cooperation between dentists and sleep physicians for MAD initiation and long-term follow-up. As this is not given in all countries nor regions, equity is probably reduced.</p> |

## Acceptability

Is the intervention acceptable to key stakeholders?

| JUDGEMENT                                                                                                                                                    | RESEARCH EVIDENCE                                           | ADDITIONAL CONSIDERATIONS                                                                                                                                                                                                                                                                             |
|--------------------------------------------------------------------------------------------------------------------------------------------------------------|-------------------------------------------------------------|-------------------------------------------------------------------------------------------------------------------------------------------------------------------------------------------------------------------------------------------------------------------------------------------------------|
| <ul style="list-style-type: none"> <li>○ No</li> <li>○ Probably no</li> <li>○ Probably yes</li> <li>● Yes</li> <li>○ Varies</li> <li>○ Don't know</li> </ul> | <p>We did not look for studies assessing acceptability.</p> | <p>Concerns on oral health, bite and craniofacial changes have to be taken into account. The intervention is usually acceptable for clinicians, patients and health insurers. Many patients prefer non-surgical alternatives. Treatment is acceptable if local side-effects are not overwhelming.</p> |

## Feasibility

| Is the intervention feasible to implement?                                                                                                                          |                                                   |                                                                                                                                                                                                                                                                        |
|---------------------------------------------------------------------------------------------------------------------------------------------------------------------|---------------------------------------------------|------------------------------------------------------------------------------------------------------------------------------------------------------------------------------------------------------------------------------------------------------------------------|
| JUDGEMENT                                                                                                                                                           | RESEARCH EVIDENCE                                 | ADDITIONAL CONSIDERATIONS                                                                                                                                                                                                                                              |
| <ul style="list-style-type: none"> <li>○ No</li> <li>○ Probably no</li> <li>○ Probably yes</li> <li>○ Yes</li> <li>● <b>Varies</b></li> <li>○ Don't know</li> </ul> | We did not look for studies assessing feasibility | <p>The feasibility depends on the availability of the device, dedicated dentists, and reimbursement. These aspects vary substantially.</p> <p>There are technical limitations according to oral health, anatomical abnormalities and a sufficient number of teeth.</p> |

## SUMMARY OF JUDGEMENTS

|                                             | JUDGEMENT                            |                                                      |                                                                 |                                         |                         |               |                            |
|---------------------------------------------|--------------------------------------|------------------------------------------------------|-----------------------------------------------------------------|-----------------------------------------|-------------------------|---------------|----------------------------|
| PROBLEM                                     | No                                   | Probably no                                          | Probably yes                                                    | <b>Yes</b>                              |                         | Varies        | Don't know                 |
| DESIRABLE EFFECTS                           | Trivial                              | Small                                                | Moderate                                                        | Large                                   |                         | Varies        | <b>Don't know</b>          |
| UNDESIRABLE EFFECTS                         | Large                                | Moderate                                             | <b>Small</b>                                                    | Trivial                                 |                         | Varies        | Don't know                 |
| CERTAINTY OF EVIDENCE                       | Very low                             | <b>Low</b>                                           | Moderate                                                        | High                                    |                         |               | No included studies        |
| VALUES                                      | Important uncertainty or variability | <b>Possibly important uncertainty or variability</b> | Probably no important uncertainty or variability                | No important uncertainty or variability |                         |               |                            |
| BALANCE OF EFFECTS                          | Favors the comparison                | <b>Probably favors the comparison</b>                | Does not favor either the intervention or the comparison        | Probably favors the intervention        | Favors the intervention | Varies        | Don't know                 |
| RESOURCES REQUIRED                          | Large costs                          | Moderate costs                                       | Negligible costs and savings                                    | Moderate savings                        | Large savings           | <b>Varies</b> | Don't know                 |
| CERTAINTY OF EVIDENCE OF REQUIRED RESOURCES | Very low                             | Low                                                  | Moderate                                                        | High                                    |                         |               | <b>No included studies</b> |
| COST EFFECTIVENESS                          | Favors the comparison                | Probably favors the comparison                       | <b>Does not favor either the intervention or the comparison</b> | Probably favors the intervention        | Favors the intervention | Varies        | No included studies        |
| EQUITY                                      | Reduced                              | <b>Probably reduced</b>                              | Probably no impact                                              | Probably increased                      | Increased               | Varies        | Don't know                 |

## JUDGEMENT

|                      |    |             |              |            |  |               |            |
|----------------------|----|-------------|--------------|------------|--|---------------|------------|
| <b>ACCEPTABILITY</b> | No | Probably no | Probably yes | <b>Yes</b> |  | Varies        | Don't know |
| <b>FEASIBILITY</b>   | No | Probably no | Probably yes | Yes        |  | <b>Varies</b> | Don't know |

## TYPE OF RECOMMENDATION

|                                                                         |                                                                                                |                                                                                                   |                                                                          |                                                                     |
|-------------------------------------------------------------------------|------------------------------------------------------------------------------------------------|---------------------------------------------------------------------------------------------------|--------------------------------------------------------------------------|---------------------------------------------------------------------|
| Strong recommendation against the intervention<br><input type="radio"/> | <b>Conditional recommendation against the intervention</b><br><input checked="" type="radio"/> | Conditional recommendation for either the intervention or the comparison<br><input type="radio"/> | Conditional recommendation for the intervention<br><input type="radio"/> | Strong recommendation for the intervention<br><input type="radio"/> |
|-------------------------------------------------------------------------|------------------------------------------------------------------------------------------------|---------------------------------------------------------------------------------------------------|--------------------------------------------------------------------------|---------------------------------------------------------------------|

## CONCLUSIONS

### Recommendation

In adult patients with OSA, we suggest that CPAP should be used as compared to MAD (conditional recommendation, low quality of evidence).

This recommendation does not differentiate regarding the severity of the disease. This is because most studies did not focus on specific subgroups in their inclusion criteria. However, most publications presented with mild to moderate OSA, while only a minor proportion with severe cases. In mild-moderate OSA, the difference in AHI becomes less important and therefore, due to equal effects on sleepiness and quality of life, both devices can be considered equally.

### Justification

This recommendation is mainly based on the higher decrease of the AHI with CPAP over MAD. CPAP has a greater impact on AHI decrease, independently of OSA severity. This consideration, in addition to the higher impact of CPAP on systolic night-time BP decrease in severe OSA, leads the panel to a conditional recommendation in favour of CPAP in patients with OSA. However, in mild and moderate OSA, the AHI under MAD treatment is usually low and close to the normal range. Furthermore, there is some evidence of a better compliance and patient's preference in favour of MAD as compared to CPAP and similar impact on sleepiness and quality of life. Altogether, those considerations lead the panel to recommend CPAP and MAD equally in patients with mild to moderate OSA. With increasing severity of OSA, taking into account comorbidities, as well as odontological concerns, CPAP should be considered also in this group of patients.

### Subgroup considerations

AHI less important in mild OSA.  
Patients with nighttime hypertension benefit more from CPAP.

### Implementation considerations



Availability differs due to different healthcare systems.

Training and interest of dentists, and long-time follow-up, cooperation between dentists and sleep physicians.

## Monitoring and evaluation

Regular at least yearly follow-up with evaluation of adherence, symptoms, quality of life, efficacy (AHI, oxygenation), contraindications (oral health), side effects.

## Research priorities

Studies with a higher number of patients, different severity categories, unbiased studies (no selection of patients), for other outcomes than AHI, studies including patients with all levels of weight/BMI, studies with cardiovascular outcome parameters needed, level of symptoms / symptomatic sufferers (since it is the symptoms that brings patients to doctors), studies that take co-morbidities into account, long-time follow-up, objective compliance measurements, comparable cost-effectiveness studies in European countries; different types of devices, some are still entering the market; combination therapies (with positional therapy and CPAP)

## PICO 2 APPENDICES

### PICO 2 Appendix 1

| Outcomes                                                                                                                                                 | Anticipated absolute effects* (95% CI)                                                                                                                                                                                                                               |                                                                | Relative effect (95% CI) | No of participants (studies) | Certainty of the evidence (GRADE) | Comments |
|----------------------------------------------------------------------------------------------------------------------------------------------------------|----------------------------------------------------------------------------------------------------------------------------------------------------------------------------------------------------------------------------------------------------------------------|----------------------------------------------------------------|--------------------------|------------------------------|-----------------------------------|----------|
|                                                                                                                                                          | Risk with CPAP                                                                                                                                                                                                                                                       | Risk with custom made dual-block mandibular advancement device |                          |                              |                                   |          |
| Apnea-hypopnea index (events/h) (AHI)<br>assessed with: PSG at different time points (range 1 months - 12 months); Scale from 0 (best) to higher (worse) | The mean apnea-hypopnea index (events/h) was <b>3.7</b> events/hour                                                                                                                                                                                                  | MD <b>7.76 events/hour more</b> (5.49 more to 10.02 more)      | -                        | 1110 (13 RCTs)               | ⊕⊕○○<br>LOW <sup>a,b</sup>        |          |
| Sleep efficiency % (SEI)<br>assessed with: PSG at different time points (range: 1 month to 4 months); Scale from 0 (worst) to 100 (best)                 | The mean sleep efficiency % was <b>84.1</b> %                                                                                                                                                                                                                        | MD <b>0.32 % lower</b> (2.23 lower to 1.59 higher)             | -                        | 871 (9 RCTs)                 | ⊕⊕○○<br>LOW <sup>a,b</sup>        |          |
| <3% and <4% oxygen desaturation (events/h)<br>assessed with: PSG at different time points (range 1-3 months), 0 (best) to higher (worse)                 | Five studies reported measures of oxygen desaturation (286 patients included and treated with MAD and CPAP in cross-over design). Four studies reported statistical significant results favouring CPAP. One study failed to show a statistically significant result. |                                                                | -                        | 286 (5 RCTs)                 | ⊕⊕⊕○<br>MODERATE <sup>a</sup>     |          |
| Sleepiness ESS<br>assessed with: Epworth Sleepiness Scale at different time points (range 1 month to 12 months); Scale from 1 (best) to 24 (worst)       | The mean sleepiness ESS was <b>7.0</b> points                                                                                                                                                                                                                        | MD <b>0.09 points lower</b> (0.58 lower to 0.41 higher)        | -                        | 990 (12 RCTs)                | ⊕⊕○○<br>LOW <sup>c</sup>          |          |

| Outcomes                                                                                                                                    | Anticipated absolute effects* (95% CI)                                                                                                                                                                                                                                                                                                                                                         |                                                                | Relative effect (95% CI) | No of participants (studies) | Certainty of the evidence (GRADE) | Comments                                                                                                                        |
|---------------------------------------------------------------------------------------------------------------------------------------------|------------------------------------------------------------------------------------------------------------------------------------------------------------------------------------------------------------------------------------------------------------------------------------------------------------------------------------------------------------------------------------------------|----------------------------------------------------------------|--------------------------|------------------------------|-----------------------------------|---------------------------------------------------------------------------------------------------------------------------------|
|                                                                                                                                             | Risk with CPAP                                                                                                                                                                                                                                                                                                                                                                                 | Risk with custom made dual-block mandibular advancement device |                          |                              |                                   |                                                                                                                                 |
| Physical functioning assessed with: SF36-domain at different time points (range: 1 to 6 months) Scale 0-100, higher is better               | The mean physical functioning was <b>79.3</b> points                                                                                                                                                                                                                                                                                                                                           | MD <b>0.34 points lower</b> (3.06 lower to 2.38 higher)        | -                        | 667 (7 RCTs)                 | ⊕⊕○○<br>LOW <sup>c</sup>          | Additional evidence: Aarab: "The changes in the domains of the SF-36 were not significantly different between the three groups" |
| Arterial hypertension - 24h systolic blood pressure assessed with: PSG at different time points (1 to 3 months); hypertension above 140mmHg | The mean arterial hypertension - 24h systolic blood pressure was <b>125.7</b> mmHg                                                                                                                                                                                                                                                                                                             | MD <b>0.3 mmHg lower</b> (2.19 lower to 1.59 higher)           | -                        | 514 (4 RCTs)                 | ⊕⊕⊕○<br>MODERATE <sup>a</sup>     |                                                                                                                                 |
| Arterial hypertension - 24h diastolic blood pressure assessed with: PSG at different time points (1 to 3 months); hypertension above 90mmHg | The mean arterial hypertension - 24h diastolic blood pressure was <b>77.9</b> mmHg                                                                                                                                                                                                                                                                                                             | MD <b>0.12 mmHg lower</b> (1.41 lower to 1.16 higher)          | -                        | 514 (4 RCTs)                 | ⊕⊕⊕○<br>MODERATE <sup>a</sup>     |                                                                                                                                 |
| Nighttime systolic blood pressure assessed with: PSG at different time points (1 to 3 months); hypertension above 140mmHg                   | The mean nighttime systolic blood pressure was <b>112.9</b> mmHg                                                                                                                                                                                                                                                                                                                               | Mean <b>1.56 mmHg more</b> (2.19 fewer to 5.3 more)            | -                        | 354 (3 RCTs)                 | ⊕⊕○○<br>LOW <sup>a,b</sup>        |                                                                                                                                 |
| Nighttime diastolic blood pressure assessed with: PSG at different time points (1 to 3 months); hypertension above 90mmHg                   | The mean nighttime diastolic blood pressure was <b>70.55</b> mmHg                                                                                                                                                                                                                                                                                                                              | Mean <b>0.99 mmHg lower</b> (3.08 lower to 1.09 higher)        | -                        | 514 (4 RCTs)                 | ⊕⊕○○<br>LOW <sup>a,b</sup>        |                                                                                                                                 |
| Adherence / Compliance                                                                                                                      | Nine studies reported compliance (measured variously). Of these, compliance was statistically significant better with MAD compared to CPAP in 5 cases. In the other 4 cases no statistically significant difference could be shown or no information on statistics were given. - - - - - Six studies Reported patients preferences. In one study CPAP was preferred, in the other five MAD was |                                                                | -                        | 499 (9 RCTs)                 | ⊕⊕○○<br>LOW <sup>c</sup>          |                                                                                                                                 |

| Outcomes       | Anticipated absolute effects* (95% CI)                                                                |                                                                | Relative effect (95% CI) | No of participants (studies) | Certainty of the evidence (GRADE) | Comments |
|----------------|-------------------------------------------------------------------------------------------------------|----------------------------------------------------------------|--------------------------|------------------------------|-----------------------------------|----------|
|                | Risk with CPAP                                                                                        | Risk with custom made dual-block mandibular advancement device |                          |                              |                                   |          |
|                | preferred - see supporting material.                                                                  |                                                                |                          |                              |                                   |          |
| Adverse events | Six studies reported adverse events. Frequency was described as similar and intensity as mostly mild. |                                                                | -                        | 264 (6 RCTs)                 | ⊕⊕○○<br>LOW <sup>c</sup>          |          |

- a. Minus 1 point for study limitations due to 2 or more domains at high risk of bias (mostly cross-over design and unblinded personnel)
- b. Minus 1 point for inconsistency due to I2 results and not overlapping confidence intervals
- c. Minus 2 points for study limitations due to 2 or more domains at high risk of bias (unblinded design with subjectively reported outcome and cross-over study design)

## PICO 2 Appendix 2

| Outcomes                                                                                                                                             | Importance | Certainty of the evidence (GRADE) |
|------------------------------------------------------------------------------------------------------------------------------------------------------|------------|-----------------------------------|
| Apnoea-hypopnoea index (events/h)<br>assessed with: PSG at different time points (range 1 months - 12 months); Scale from 0 (best) to higher (worse) | CRITICAL   | ⊕⊕○○<br>LOW <sup>a,b</sup>        |
| Sleep efficiency %<br>assessed with: PSG at different time points (range: 1 month to 4 months); Scale from 0 (worst) to 100 best)                    | CRITICAL   | ⊕⊕○○<br>LOW <sup>a,b</sup>        |
| <3% and <4% oxygen desaturation (events/h)<br>assessed with: PSG at different time points (range 1-3 months), 0 (best) to higher (worse)             | CRITICAL   | ⊕⊕⊕○<br>MODERATE <sup>a</sup>     |
| Sleepiness ESS<br>assessed with: Epworth Sleepiness Scale at different time points (range 1 month to 12 months); Scale from 1 (best) to 24 (worst)   | CRITICAL   | ⊕⊕○○<br>LOW <sup>c</sup>          |
| Physical functioning<br>assessed with: SF36-domain at different time points (range: 1 to 6 months) Scale 0-100, higher is better                     | CRITICAL   | ⊕⊕○○<br>LOW <sup>c</sup>          |
| Arterial hypertension - 24h systolic blood pressure<br>assessed with: PSG at different time points (1 to 3 months); hypertension above 140mmHg       | CRITICAL   | ⊕⊕⊕○<br>MODERATE <sup>a</sup>     |
| Arterial hypertension - 24h diastolic blood pressure<br>assessed with: PSG at different time points (1 to 3 months); hypertension above 90mmHg       | CRITICAL   | ⊕⊕⊕○<br>MODERATE <sup>a</sup>     |
| Nighttime systolic blood pressure<br>assessed with: PSG at different time points (1 to 3 months); hypertension above 140mmHg                         |            | ⊕⊕○○<br>LOW <sup>a,b</sup>        |
| Nighttime diastolic blood pressure<br>assessed with: PSG at different time points (1 to 3 months); hypertension above 90mmHg                         |            | ⊕⊕○○<br>LOW <sup>a,b</sup>        |
| Adherence / Compliance                                                                                                                               | CRITICAL   | ⊕⊕○○<br>LOW <sup>c</sup>          |

| Outcomes       | Importance | Certainty of the evidence (GRADE)                                                                       |
|----------------|------------|---------------------------------------------------------------------------------------------------------|
| Adverse events | CRITICAL   | <br>LOW <sup>c</sup> |

- a. Minus 1 point for study limitations due to 2 or more domains at high risk of bias (mostly cross-over design and unblinded personnel).
- b. Minus 1 point for inconsistency due to 2 results and not overlapping confidence intervals.
- c. Minus 2 points for study limitations due to 2 or more domains at high risk of bias (unblinded design with subjectively reported outcome and cross-over study design).

**Table e13: PICO 3**

## QUESTION

| Should hypoglossal nerve stimulation during sleep or no treatment be used for adult patients with obstructive sleep apnoea? |                                                                                                                                                                                                                                                |
|-----------------------------------------------------------------------------------------------------------------------------|------------------------------------------------------------------------------------------------------------------------------------------------------------------------------------------------------------------------------------------------|
| POPULATION:                                                                                                                 | Adult patients with obstructive sleep apnoea.                                                                                                                                                                                                  |
| INTERVENTION:                                                                                                               | Hypoglossal nerve stimulation during sleep.                                                                                                                                                                                                    |
| COMPARISON:                                                                                                                 | No treatment.                                                                                                                                                                                                                                  |
| MAIN OUTCOMES:                                                                                                              | Apnoea-hypopnoea index (events/hour); Sleep efficiency %; 4% oxygen desaturation; Sleepiness; Quality of life; Arterial hypertension (blood pressure systolic above 140mmHg and diastolic above 90mmHg); Compliance/adherence; Adverse events. |
| SETTING:                                                                                                                    |                                                                                                                                                                                                                                                |
| PERSPECTIVE:                                                                                                                |                                                                                                                                                                                                                                                |
| BACKGROUND:                                                                                                                 |                                                                                                                                                                                                                                                |
| CONFLICT OF INTERESTS:                                                                                                      |                                                                                                                                                                                                                                                |

## ASSESSMENT

| <b>Problem</b><br>Is the problem a priority?                                                                                                                                                                                                                                                    |                                                                                                                                                                                                                                                                                                           |                                                                                                                                                                  |
|-------------------------------------------------------------------------------------------------------------------------------------------------------------------------------------------------------------------------------------------------------------------------------------------------|-----------------------------------------------------------------------------------------------------------------------------------------------------------------------------------------------------------------------------------------------------------------------------------------------------------|------------------------------------------------------------------------------------------------------------------------------------------------------------------|
| JUDGEMENT                                                                                                                                                                                                                                                                                       | RESEARCH EVIDENCE                                                                                                                                                                                                                                                                                         | ADDITIONAL CONSIDERATIONS                                                                                                                                        |
| <ul style="list-style-type: none"> <li><input type="radio"/> No</li> <li><input type="radio"/> Probably no</li> <li><input type="radio"/> Probably yes</li> <li><input checked="" type="radio"/> Yes</li> <li><input type="radio"/> Varies</li> <li><input type="radio"/> Don't know</li> </ul> | There is an increasing group of patients with implanted HNS, particularly in the USA and Germany. Some national healthcare systems support HNS as an alternative (first or second line) to CPAP. However, there is limited evidence from prospective RCTs despite growing evidence from cohort follow up. | It is of interest to have more evidence on prospective AHI, ODI and ESS improvements, as well as compliance/adherence and impact on measures of quality of life. |

## Desirable Effects

How substantial are the desirable anticipated effects?

| JUDGEMENT                                                                                                                                                 | RESEARCH EVIDENCE                                                                                                                                                                                                                                                                                                                                                                                                                                                                                                                   | ADDITIONAL CONSIDERATIONS                                                                                                                                                                             |
|-----------------------------------------------------------------------------------------------------------------------------------------------------------|-------------------------------------------------------------------------------------------------------------------------------------------------------------------------------------------------------------------------------------------------------------------------------------------------------------------------------------------------------------------------------------------------------------------------------------------------------------------------------------------------------------------------------------|-------------------------------------------------------------------------------------------------------------------------------------------------------------------------------------------------------|
| <ul style="list-style-type: none"> <li>○ Trivial</li> <li>● Small</li> <li>○ Moderate</li> <li>○ Large</li> <li>○ Varies</li> <li>○ Don't know</li> </ul> | <p>The STAR trial provided evidence in a therapy withdrawal design (improvement of AHI/ODI and ESS), while the TESLA trial provided only short-term evidence on the primary outcome, the 4%ODI, which improved significantly, not the AHI.</p> <p>Responders to treatment were identified prior to inclusion in the STAR trial, not in the TESLA trial. However, 17/36 patients were labelled responders in the non-invasive approach (TESLA) revealing significant improvements in 4%ODI and AHI.</p> <p><i>See Appendix 1</i></p> | <p>Information from cohort studies reporting on the follow up over now &gt;5 years reveal evidence that AHI, ODI and ESS significantly improve with ongoing efficacy and safety of the treatment.</p> |

## Undesirable Effects

How substantial are the undesirable anticipated effects?

| JUDGEMENT                                                                                                                                                 | RESEARCH EVIDENCE                                                                                                                                                                                                                                                                                                                                                                                                     | ADDITIONAL CONSIDERATIONS                                                                                                                                                                                                                                                                                                 |
|-----------------------------------------------------------------------------------------------------------------------------------------------------------|-----------------------------------------------------------------------------------------------------------------------------------------------------------------------------------------------------------------------------------------------------------------------------------------------------------------------------------------------------------------------------------------------------------------------|---------------------------------------------------------------------------------------------------------------------------------------------------------------------------------------------------------------------------------------------------------------------------------------------------------------------------|
| <ul style="list-style-type: none"> <li>○ Large</li> <li>○ Moderate</li> <li>● Small</li> <li>○ Trivial</li> <li>○ Varies</li> <li>○ Don't know</li> </ul> | <p>Undesirable effects related to the invasive HNS are predominantly intervention/procedure related; the total SAE's in the follow up period of the STAR trial was about 2%.</p> <p>The non-invasive approach (TESLA) has no reported SAE's, but improves mouth-dryness. Claustrophobia was reported in the study by one patient for both intervention and sham-control stimulation.</p> <p><i>See Appendix 1</i></p> | <p>The severity and invasiveness of undesirable effect depends on the method (invasive procedures vs transcutaneous/non-invasive intervention).</p> <p>Follow up and compliance should be reported separately, as it is likely that SAE's, side effects and compliance will significantly differ between the methods.</p> |

## Certainty of evidence

What is the overall certainty of the evidence of effects?

| JUDGEMENT                                                                                                                                      | RESEARCH EVIDENCE                                                                                                                                                                                     | ADDITIONAL CONSIDERATIONS                                                                                                                                                                   |
|------------------------------------------------------------------------------------------------------------------------------------------------|-------------------------------------------------------------------------------------------------------------------------------------------------------------------------------------------------------|---------------------------------------------------------------------------------------------------------------------------------------------------------------------------------------------|
| <ul style="list-style-type: none"> <li>● Very low</li> <li>○ Low</li> <li>○ Moderate</li> <li>○ High</li> <li>○ No included studies</li> </ul> | <p>The overall quality of the evidence from prospective RCTs was low. More data have become available in long-term follow up studies of cohorts established on HNS.</p> <p><i>See Appendix 2.</i></p> | <p>There are sparse data on long-term prospective RCTs with higher number of patients, including different levels of OSA severity, various comorbidities and weight categories/genders.</p> |

## Values



**Is there important uncertainty about or variability in how much people value the main outcomes?**

| JUDGEMENT                                                                                                                                                                                                                                                        | RESEARCH EVIDENCE                                                                                                                                                                                                                                                                                                                                                                                                                                                                                                                                                 | ADDITIONAL CONSIDERATIONS                                                                                                                                                                                                                                                                                                                                                                                                                                                                                                                                                                                |
|------------------------------------------------------------------------------------------------------------------------------------------------------------------------------------------------------------------------------------------------------------------|-------------------------------------------------------------------------------------------------------------------------------------------------------------------------------------------------------------------------------------------------------------------------------------------------------------------------------------------------------------------------------------------------------------------------------------------------------------------------------------------------------------------------------------------------------------------|----------------------------------------------------------------------------------------------------------------------------------------------------------------------------------------------------------------------------------------------------------------------------------------------------------------------------------------------------------------------------------------------------------------------------------------------------------------------------------------------------------------------------------------------------------------------------------------------------------|
| <ul style="list-style-type: none"> <li>● Important uncertainty or variability</li> <li>○ Possibly important uncertainty or variability</li> <li>○ Probably no important uncertainty or variability</li> <li>○ No important uncertainty or variability</li> </ul> | <p>Except for the transcutaneous method, the procedure of HNS is considered invasive for clinicians, patients and health insurers. There are differences in patients' preferences and knowledge and experience of sleep physicians and ENT surgeons using the implantable HNS.</p> <p>The transcutaneous approach (TESLA/non-invasive) entails low costs (TENS machine) and has a low side effect profile.</p> <p>Patients are interested in these innovative approaches, where less sleepy patients are more likely to choose less invasive techniques [29].</p> | <p>HNS is not applied in Belgium / other countries as well, not largely applied. The USA and Germany employ the invasive method, while the UK has developed the non-invasive approach (TESLA) which is less expensive (currently undergoing domiciliary RCT/TESLA home).</p> <p>It is thought that the invasive HNS is too expensive in Europe.</p> <p>NICE has developed a guidance for HNS, but it is not used in the UK yet, and reimbursement remains unclear.</p> <p>As long as HNS is available in some countries only, but not all, it is thought to remain available only to a few patients.</p> |

**Balance of effects**  
Does the balance between desirable and undesirable effects favor the intervention or the comparison?

| JUDGEMENT                                                                                                                                                                                                                                                                                                      | RESEARCH EVIDENCE                                                                                                                                                                                   | ADDITIONAL CONSIDERATIONS                                                                                                                                                                                                                                                                                                                                                                                                                                                                                                                                                                                                                    |
|----------------------------------------------------------------------------------------------------------------------------------------------------------------------------------------------------------------------------------------------------------------------------------------------------------------|-----------------------------------------------------------------------------------------------------------------------------------------------------------------------------------------------------|----------------------------------------------------------------------------------------------------------------------------------------------------------------------------------------------------------------------------------------------------------------------------------------------------------------------------------------------------------------------------------------------------------------------------------------------------------------------------------------------------------------------------------------------------------------------------------------------------------------------------------------------|
| <ul style="list-style-type: none"> <li>○ Favors the comparison</li> <li>○ Probably favors the comparison</li> <li>○ Does not favor either the intervention or the comparison</li> <li>● Probably favors the intervention</li> <li>○ Favors the intervention</li> <li>○ Varies</li> <li>○ Don't know</li> </ul> | <p>CPAP has in general a greater impact on the AHI/ODI, particularly in obese patients with very severe OSA. CPAP has proven efficacy on long-term outcomes, quality of life and cost-efficacy.</p> | <p>In a specific group of patients, HNS may be considered: non-responders to CPAP and MAD who remain sleepy may benefit from this treatment. In addition, non-compliant patients who do not continue with first line therapy, such as CPAP/MAD&lt; may benefit from this approach.</p> <p>On other hand, HNS remains not easily available, although this may change in future and with the availability of a non-invasive approach.</p> <p>The current prospective evidence from RCTs does not show statistically significant improvements between groups, although follow up cohorts and recent meta-analysis may add to this evidence.</p> |

**Resources required**  
How large are the resource requirements (costs)?

| JUDGEMENT | RESEARCH EVIDENCE | ADDITIONAL CONSIDERATIONS |
|-----------|-------------------|---------------------------|
|-----------|-------------------|---------------------------|

|                                                                                                                                                                                                                                |                                           |                                                                                                                                                                                              |
|--------------------------------------------------------------------------------------------------------------------------------------------------------------------------------------------------------------------------------|-------------------------------------------|----------------------------------------------------------------------------------------------------------------------------------------------------------------------------------------------|
| <ul style="list-style-type: none"> <li>● Large costs</li> <li>○ Moderate costs</li> <li>○ Negligible costs and savings</li> <li>○ Moderate savings</li> <li>○ Large savings</li> <li>○ Varies</li> <li>○ Don't know</li> </ul> | We did not look for studies on resources. | There are huge differences between health care systems throughout Europe. There are unique reimbursement strategies. Therefore, no general statements on socioeconomic aspects can be given. |
|--------------------------------------------------------------------------------------------------------------------------------------------------------------------------------------------------------------------------------|-------------------------------------------|----------------------------------------------------------------------------------------------------------------------------------------------------------------------------------------------|

## Certainty of evidence of required resources

What is the certainty of the evidence of resource requirements (costs)?

| JUDGEMENT                                                                                                                                      | RESEARCH EVIDENCE                         | ADDITIONAL CONSIDERATIONS                                                                                                                                                                    |
|------------------------------------------------------------------------------------------------------------------------------------------------|-------------------------------------------|----------------------------------------------------------------------------------------------------------------------------------------------------------------------------------------------|
| <ul style="list-style-type: none"> <li>○ Very low</li> <li>○ Low</li> <li>○ Moderate</li> <li>● High</li> <li>○ No included studies</li> </ul> | We did not look for studies on resources. | There are huge differences between health care systems throughout Europe. There are unique reimbursement strategies. Therefore, no general statements on socioeconomic aspects can be given. |

## Cost effectiveness

Does the cost-effectiveness of the intervention favor the intervention or the comparison?

| JUDGEMENT                                                                                                                                                                                                                                                                                                               | RESEARCH EVIDENCE                                  | ADDITIONAL CONSIDERATIONS                                                                                                                                                                    |
|-------------------------------------------------------------------------------------------------------------------------------------------------------------------------------------------------------------------------------------------------------------------------------------------------------------------------|----------------------------------------------------|----------------------------------------------------------------------------------------------------------------------------------------------------------------------------------------------|
| <ul style="list-style-type: none"> <li>○ Favors the comparison</li> <li>○ Probably favors the comparison</li> <li>● Does not favor either the intervention or the comparison</li> <li>○ Probably favors the intervention</li> <li>○ Favors the intervention</li> <li>○ Varies</li> <li>○ No included studies</li> </ul> | We did not look for studies on cost-effectiveness. | There are huge differences between health care systems throughout Europe. There are unique reimbursement strategies. Therefore, no general statements on socioeconomic aspects can be given. |

## Equity

What would be the impact on health equity?

| JUDGEMENT                                                                                                                                           | RESEARCH EVIDENCE                             | ADDITIONAL CONSIDERATIONS                                                                                                                                                                                                                 |
|-----------------------------------------------------------------------------------------------------------------------------------------------------|-----------------------------------------------|-------------------------------------------------------------------------------------------------------------------------------------------------------------------------------------------------------------------------------------------|
| <ul style="list-style-type: none"> <li>○ Reduced</li> <li>● Probably reduced</li> <li>○ Probably no impact</li> <li>○ Probably increased</li> </ul> | We did not look for studies on health equity. | The availability of HNS treatment may differ significantly between countries, as in some countries this treatment is supported by the healthcare system (e.g. USA/Germany), while it remains unavailable in many other countries. Not all |

|                                                                                                       |  |                                                                                                                |
|-------------------------------------------------------------------------------------------------------|--|----------------------------------------------------------------------------------------------------------------|
| <ul style="list-style-type: none"> <li>○ Increased</li> <li>○ Varies</li> <li>○ Don't know</li> </ul> |  | patients can access it as HNS and TESLA are typically available in centres only. Therefore, equity is reduced. |
|-------------------------------------------------------------------------------------------------------|--|----------------------------------------------------------------------------------------------------------------|

## Acceptability

Is the intervention acceptable to key stakeholders?

| JUDGEMENT                                                                                                                                                    | RESEARCH EVIDENCE                                                                                                                                              | ADDITIONAL CONSIDERATIONS                                                                                                                                                                                                                                                                                                                             |
|--------------------------------------------------------------------------------------------------------------------------------------------------------------|----------------------------------------------------------------------------------------------------------------------------------------------------------------|-------------------------------------------------------------------------------------------------------------------------------------------------------------------------------------------------------------------------------------------------------------------------------------------------------------------------------------------------------|
| <ul style="list-style-type: none"> <li>○ No</li> <li>○ Probably no</li> <li>● Probably yes</li> <li>○ Yes</li> <li>○ Varies</li> <li>○ Don't know</li> </ul> | We did not look for studies assessing acceptability, but quote the patient feedback in the TESLA trial (with good acceptability and low side effect spectrum). | <p>From patients' perspective, there are high expectations, alternative therapies to CPAP/ MAD may appeal as very popular and very acceptable.</p> <p>However, the invasive approach is not easily reversible, which limits acceptability. This may be helped in a wider availability of a non-invasive approach in future (e.g. TESLA home RCT).</p> |

## Feasibility

Is the intervention feasible to implement?

| JUDGEMENT                                                                                                                                                    | RESEARCH EVIDENCE                                  | ADDITIONAL CONSIDERATIONS                                                                                                                                                                                                                                                                                                                                                                                                                                                  |
|--------------------------------------------------------------------------------------------------------------------------------------------------------------|----------------------------------------------------|----------------------------------------------------------------------------------------------------------------------------------------------------------------------------------------------------------------------------------------------------------------------------------------------------------------------------------------------------------------------------------------------------------------------------------------------------------------------------|
| <ul style="list-style-type: none"> <li>○ No</li> <li>● Probably no</li> <li>○ Probably yes</li> <li>○ Yes</li> <li>○ Varies</li> <li>○ Don't know</li> </ul> | We did not look for studies assessing feasibility. | <p>The feasibility depends on the availability of the device, sleep laboratory, ENT surgeon (with DISE experience) and operating theatre. It needs to be differentiated between the invasive (STAR) and non-invasive (TESLA) approach, as transcutaneous electrical stimulation is widely available and requires less sophisticated titration / follow up.</p> <p>However, there remains uncertainty about outcomes, risks, costs, and availability between countries.</p> |

## SUMMARY OF JUDGEMENTS

|         | JUDGEMENT |             |              |     |  |        |            |
|---------|-----------|-------------|--------------|-----|--|--------|------------|
| PROBLEM | No        | Probably no | Probably yes | Yes |  | Varies | Don't know |

## JUDGEMENT

|                                                    |                                             |                                               |                                                                 |                                         |                         |        |                     |
|----------------------------------------------------|---------------------------------------------|-----------------------------------------------|-----------------------------------------------------------------|-----------------------------------------|-------------------------|--------|---------------------|
|                                                    | <b>JUDGEMENT</b>                            |                                               |                                                                 |                                         |                         |        |                     |
| <b>DESIRABLE EFFECTS</b>                           | Trivial                                     | <b>Small</b>                                  | Moderate                                                        | Large                                   |                         | Varies | Don't know          |
| <b>UNDESIRABLE EFFECTS</b>                         | Large                                       | Moderate                                      | <b>Small</b>                                                    | Trivial                                 |                         | Varies | Don't know          |
| <b>CERTAINTY OF EVIDENCE</b>                       | <b>Very low</b>                             | Low                                           | Moderate                                                        | High                                    |                         |        | No included studies |
| <b>VALUES</b>                                      | <b>Important uncertainty or variability</b> | Possibly important uncertainty or variability | Probably no important uncertainty or variability                | No important uncertainty or variability |                         |        |                     |
| <b>BALANCE OF EFFECTS</b>                          | Favors the comparison                       | Probably favors the comparison                | Does not favor either the intervention or the comparison        | <b>Probably favors the intervention</b> | Favors the intervention | Varies | Don't know          |
| <b>RESOURCES REQUIRED</b>                          | <b>Large costs</b>                          | Moderate costs                                | Negligible costs and savings                                    | Moderate savings                        | Large savings           | Varies | Don't know          |
| <b>CERTAINTY OF EVIDENCE OF REQUIRED RESOURCES</b> | Very low                                    | Low                                           | Moderate                                                        | <b>High</b>                             |                         |        | No included studies |
| <b>COST EFFECTIVENESS</b>                          | Favors the comparison                       | Probably favors the comparison                | <b>Does not favor either the intervention or the comparison</b> | Probably favors the intervention        | Favors the intervention | Varies | No included studies |
| <b>EQUITY</b>                                      | Reduced                                     | <b>Probably reduced</b>                       | Probably no impact                                              | Probably increased                      | Increased               | Varies | Don't know          |
| <b>ACCEPTABILITY</b>                               | No                                          | Probably no                                   | <b>Probably yes</b>                                             | Yes                                     |                         | Varies | Don't know          |
| <b>FEASIBILITY</b>                                 | No                                          | <b>Probably no</b>                            | Probably yes                                                    | Yes                                     |                         | Varies | Don't know          |

## TYPE OF RECOMMENDATION

|                                                                         |                                                                                                |                                                                                                   |                                                                          |                                                                     |
|-------------------------------------------------------------------------|------------------------------------------------------------------------------------------------|---------------------------------------------------------------------------------------------------|--------------------------------------------------------------------------|---------------------------------------------------------------------|
| Strong recommendation against the intervention<br><input type="radio"/> | <b>Conditional recommendation against the intervention</b><br><input checked="" type="radio"/> | Conditional recommendation for either the intervention or the comparison<br><input type="radio"/> | Conditional recommendation for the intervention<br><input type="radio"/> | Strong recommendation for the intervention<br><input type="radio"/> |
|-------------------------------------------------------------------------|------------------------------------------------------------------------------------------------|---------------------------------------------------------------------------------------------------|--------------------------------------------------------------------------|---------------------------------------------------------------------|

## CONCLUSIONS

## Recommendation

We suggest that hypoglossal nerve stimulation should not be used as first line treatment for OSA patients in general (conditional recommendation, low quality of evidence). However, we suggest that hypoglossal nerve stimulation compared to no treatment should be used as a salvage treatment in patients with symptomatic obstructive sleep apnoea, who cannot be sufficiently treated with positive airway pressure treatment (CPAP, BPAP) or MAD, and who have an AHI below 50/hour and a BMI <32 kg/m<sup>2</sup> (conditional recommendation, very low quality of evidence).

## Justification

This recommendation is mainly based on the limited evidence available for this intervention; No RCT in HNS in unselected patients is available. No significant reduction in AHI or sleepiness was found with TESLA, while quality of life improved. For some patients seeking for alternative treatment, it might be an acceptable treatment option.

## Subgroup considerations

It is important to consider subgroups of responders and non-responders to this treatment, which is also defined by OSA severity and BMI, neck circumference. The outcomes have also to be balanced related to the underlying pathophysiological traits of OSA. Some patients may be more willing to accept surgical intervention if intolerant to CPAP or reluctant to use it. Future study designs should compare this method against usual care (CPAP/MAD) and include longer follow-up periods and markers for quality of life / symptoms. Furthermore, consideration needs to be given to the various different methods of HNS, particularly the invasive vs transcutaneous (non-invasive) approach.

## Implementation considerations

Availability differs due to different healthcare systems and approvals / lack of approvals. The required training of staff in the sleep laboratory, ENT surgeon, anaesthetist and titration of the devices in the invasive approach of HNS limit implementation in any other setting than centres.

In contrast, the non-invasive approach (TESLA) using TENS machines may become more widely available, although comfortable settings (current) and effective intensity need to be considered when establishing patients on this treatment.

## Monitoring and evaluation

Regular and at least annual follow-up should be performed just as in CPAP / other treatments to demonstrate efficacy (AHI/ODI, symptoms, quality of life), adherence, safety and long-term implications.

## Research priorities

Prospective RCT using HNS / TESLA with CPAP or MAD in the control arm should be undertaken, ideally with longer follow up periods, to prove the efficacy on outcomes (AHI/ODI, symptoms, quality of life, compliance). Responders and non-responders, as well as the different levels of efficacies dependent on the OSA severity, BMI and gender require further attention. Health-related cost-efficacy studies would be useful for various healthcare settings and methods. Combination therapies with CPAP and MAD may be useful.

Additional outcomes to study: effect on hypertension, metabolic effects, symptomatic improvement.

Cohorts of interest: patients with conditions that may not allow for the use of facial masks due to required care (or dexterity), e.g. neuromuscular conditions, post-stroke, learning disability, anxiety.

## PICO 3 APPENDICES

### PICO 3 Appendix 1

| Outcomes                                                                                                                                                                                                                                                      | Impact                                                                                                                                                                                                                                                              | No of participants (studies) | Certainty of the evidence (GRADE) |
|---------------------------------------------------------------------------------------------------------------------------------------------------------------------------------------------------------------------------------------------------------------|---------------------------------------------------------------------------------------------------------------------------------------------------------------------------------------------------------------------------------------------------------------------|------------------------------|-----------------------------------|
| Apoptea-hypopnea index (events/hour) (AHI) assessed with: PSG at different follow-up points (range: 1 night to 6 months)                                                                                                                                      | Two out of three included studies showed no statistical difference between groups at 1 night and 6 months follow-up, while one study showed statistically significant difference favouring the intervention after 1 week therapy withdrawal in previous responders. | 103 (3 RCTs)                 | ⊕○○○<br>VERY LOW <sup>a,b,c</sup> |
| Sleep efficiency % assessed with: PSG (follow-up 1 night)                                                                                                                                                                                                     | One study reported sleep efficiency for the one night of each intervention and showed no statistically significant difference between arms.                                                                                                                         | 36 (1 RCT)                   | ⊕○○○<br>VERY LOW <sup>a,d</sup>   |
| 4% oxygen desaturation (ODI) assessed with: PSG at different follow-up time points (range: 1 night to 6 months)                                                                                                                                               | Two out of three included studies showed no statistical difference between groups after 1 week and 6 months follow-up, while one study showed statistically significant difference favouring the intervention at the one night of treatment.                        | 103 (3 RCTs)                 | ⊕○○○<br>VERY LOW <sup>a,b,e</sup> |
| Sleepiness assessed with: Stanford (1x) and Epworth (2x) Sleepiness Scale (range: 1 night to 6 months)                                                                                                                                                        | None of the studies showed a statistical significant effect for sleepiness (assessed with ESS by Barnes and STAR and Stanford Sleepiness Scale by TESLA).                                                                                                           | 103 (3 RCTs)                 | ⊕○○○<br>VERY LOW <sup>a,b,c</sup> |
| Quality of life assessed with: Functional Outcomes of Sleep Questionnaire "scores range from 5.0 to 20.0, with higher scores indicating greater functioning" and Beck Depression Inventar (0 points (best) to 63 (worst)) follow-up range: 1 week to 6 months | Two studies reported outcomes relating to quality of life (1 week and 6 months follow-up) and both showed statistical significant effects favouring the intervention.                                                                                               | 67 (2 RCTs)                  | ⊕○○○<br>VERY LOW <sup>a,b</sup>   |
| Arterial hypertension (blood pressure systolic above 140mmHG and diastolic above 90mmHg)                                                                                                                                                                      | One study reported no statistical significant differences between intervention and control looking at systolic and diastolic blood pressure after 1 week of therapy withdrawal.                                                                                     | 46 (1 RCT)                   | ⊕○○○<br>VERY LOW <sup>a,d</sup>   |

| Outcomes                                                                                                 | Impact                                                                                                                                                                                                                                                                                                                                                                                                                                                                                                                                                                                               | № of participants (studies) | Certainty of the evidence (GRADE) |
|----------------------------------------------------------------------------------------------------------|------------------------------------------------------------------------------------------------------------------------------------------------------------------------------------------------------------------------------------------------------------------------------------------------------------------------------------------------------------------------------------------------------------------------------------------------------------------------------------------------------------------------------------------------------------------------------------------------------|-----------------------------|-----------------------------------|
| assessed with: PSG (follow-up 1 week withdrawal)                                                         |                                                                                                                                                                                                                                                                                                                                                                                                                                                                                                                                                                                                      |                             |                                   |
| Compliance/adherence<br>assessed with: follow-up 1 night                                                 | Only one study reported the outcome 'compliance' after the 1 night of treatment: TESLA: "The patients' device acceptance was good with patients reporting no skin discomfort or unpleasant sensations at night. There was no difference in patients' perceived sleep quality. There was a 59% reduction in mouth dryness after active treatment compared to sham-stimulation. There were no severe adverse events"                                                                                                                                                                                   | 36<br>(1 RCT)               | ⊕○○○<br>VERY LOW <sup>a,d</sup>   |
| Adverse events<br>assessed with: (range: 1 night to 1 week withdrawal in RCT, but 13 month cohort study) | Two studies reported adverse events narratively. STAR (in total cohort 126, over 13 months of follow up): 2 serious adverse events device-related, another 33 serious adverse events not device-related. Most non serious adverse events implantation-related. See supporting material for further info. TESLA (transcutaneous): The only significant side effect observed was one patient who complained about claustrophobia at night; this was during both treatment nights. The total count of mild side effects occurred in 2.8% of the studied cohort and there were no severe adverse events. | 162<br>(2 RCTs)             | ⊕○○○<br>VERY LOW <sup>a,b</sup>   |

- a. Minus 1 for strongly suspected publication bias due to two terminated trials with unpublished/only partly published data
- b. Minus 2 for imprecision due limited number of patients and pooling was not possible
- c. Minus 1 for inconsistency since 2 studies show stat. sign. effect and one doesn't
- d. Minus 2 due to very limited number of patients
- e. Minus 1 for inconsistency since 2 studies show no stat. sign. effect and one does



## PICO 3 Appendix 2

| Outcomes                                                                                                                                                                                                                                                         | Importance | Certainty of the evidence (GRADE) |
|------------------------------------------------------------------------------------------------------------------------------------------------------------------------------------------------------------------------------------------------------------------|------------|-----------------------------------|
| Apnoea-hypopnoea index (events/hour)<br>assessed with: PSG at different follow-up points (range: 1 night to 6 months)                                                                                                                                            | CRITICAL   | ⊕○○○<br>VERY LOW <sup>a,b,c</sup> |
| Sleep efficiency %<br>assessed with: PSG (follow-up 1 night)                                                                                                                                                                                                     | CRITICAL   | ⊕○○○<br>VERY LOW <sup>a,d</sup>   |
| 4% oxygen desaturation<br>assessed with: PSG at different follow-up time points (range: 1 night to 6 months)                                                                                                                                                     | CRITICAL   | ⊕○○○<br>VERY LOW <sup>a,b,e</sup> |
| Sleepiness<br>assessed with: Stanford (1x) and Epworth (2x) Sleepiness Scale (range: 1 night to 6 months)                                                                                                                                                        | CRITICAL   | ⊕○○○<br>VERY LOW <sup>a,b,c</sup> |
| Quality of life<br>assessed with: Functional Outcomes of Sleep Questionnaire "scores range from 5.0 to 20.0, with higher scores indicating greater functioning" and Beck Depression Inventar (0 points (best) to 63 (worst)) follow-up range: 1 week to 6 months | CRITICAL   | ⊕○○○<br>VERY LOW <sup>a,b</sup>   |
| Arterial hypertension (blood pressure systolic above 140mmHg and diastolic above 90mmHg)<br>assessed with: PSG (follow-up 1 week withdrawal)                                                                                                                     | CRITICAL   | ⊕○○○<br>VERY LOW <sup>a,d</sup>   |
| Compliance/adherence<br>assessed with: follow-up 1 night                                                                                                                                                                                                         | CRITICAL   | ⊕○○○<br>VERY LOW <sup>a,d</sup>   |
| Adverse events<br>assessed with: (range: 1 night to 1 week withdrawal in RCT, but 13 month cohort study)                                                                                                                                                         | CRITICAL   | ⊕○○○<br>VERY LOW <sup>a,b</sup>   |

- a. Minus 1 for strongly suspected publication bias due to two terminated trials with unpublished/only partly published data.
- b. Minus 2 for imprecision due limited number of patients and pooling was not possible.
- c. Minus 1 for inconsistency since 2 studies show stat. sign. effect and one doesn't.
- d. Minus 2 due to very limited number of patients.

e. Minus 1 for inconsistency since 2 studies show no stat. sign. effect and one does.

**Table e14: PICO 4a**

**QUESTION**

| <b>Should myofunctional therapy or no treatment be used for adult patients with obstructive sleep apnoea?</b> |                                                                                                                                                                                                               |
|---------------------------------------------------------------------------------------------------------------|---------------------------------------------------------------------------------------------------------------------------------------------------------------------------------------------------------------|
| <b>POPULATION:</b>                                                                                            | Adult patients with obstructive sleep apnoea.                                                                                                                                                                 |
| <b>INTERVENTION:</b>                                                                                          | Myofunctional therapy.                                                                                                                                                                                        |
| <b>COMPARISON:</b>                                                                                            | No treatment.                                                                                                                                                                                                 |
| <b>MAIN OUTCOMES:</b>                                                                                         | Apnoea-hypopnoea index (events/hour) (AHI); Sleep efficiency %; Sleepiness ESS; Quality of life ; Adherence / Compliance measured subjectively with diary entries or objectively (Randerath); Adverse events. |
| <b>SETTING:</b>                                                                                               |                                                                                                                                                                                                               |
| <b>PERSPECTIVE:</b>                                                                                           |                                                                                                                                                                                                               |
| <b>BACKGROUND:</b>                                                                                            |                                                                                                                                                                                                               |
| <b>CONFLICT OF INTERESTS:</b>                                                                                 |                                                                                                                                                                                                               |

**ASSESSMENT**

| <b>Problem</b><br>Is the problem a priority?                                                                                                                                                                                                                                                    |                                                                                                                                                   |                                                                                                                                                                                                              |
|-------------------------------------------------------------------------------------------------------------------------------------------------------------------------------------------------------------------------------------------------------------------------------------------------|---------------------------------------------------------------------------------------------------------------------------------------------------|--------------------------------------------------------------------------------------------------------------------------------------------------------------------------------------------------------------|
| <b>JUDGEMENT</b>                                                                                                                                                                                                                                                                                | <b>RESEARCH EVIDENCE</b>                                                                                                                          | <b>ADDITIONAL CONSIDERATIONS</b>                                                                                                                                                                             |
| <ul style="list-style-type: none"> <li><input type="radio"/> No</li> <li><input type="radio"/> Probably no</li> <li><input type="radio"/> Probably yes</li> <li><input checked="" type="radio"/> Yes</li> <li><input type="radio"/> Varies</li> <li><input type="radio"/> Don't know</li> </ul> | <p>There is a need for new or complementary therapeutic modalities for OSA. Therefore, a formal European recommendation is urgently required.</p> | <p>Other reasons for this are the percentage of patients who do not respond satisfactorily to available treatments, the reduced adherence to CPAP and the possible complications of surgical procedures.</p> |

## Desirable Effects

How substantial are the desirable anticipated effects?

| JUDGEMENT                                                                                                                                                                                                                                                                                    | RESEARCH EVIDENCE                                                                                                                                                | ADDITIONAL CONSIDERATIONS                                                                                                                                                                                                        |
|----------------------------------------------------------------------------------------------------------------------------------------------------------------------------------------------------------------------------------------------------------------------------------------------|------------------------------------------------------------------------------------------------------------------------------------------------------------------|----------------------------------------------------------------------------------------------------------------------------------------------------------------------------------------------------------------------------------|
| <ul style="list-style-type: none"> <li><input type="radio"/> Trivial</li> <li><input checked="" type="radio"/> Small</li> <li><input type="radio"/> Moderate</li> <li><input type="radio"/> Large</li> <li><input type="radio"/> Varies</li> <li><input type="radio"/> Don't know</li> </ul> | <p>After intervention, small improvement in AHI, ESS and quality of life, no statistically significant results in all studies.</p> <p><i>See Appendix 1.</i></p> | <p>Effect might be only temporary.</p> <p>AHI : although statistically significant, potentially not from moderate to mild.</p> <p>More than 2 points for ESS means a clinically significant change: symptomatic improvement.</p> |

## Undesirable Effects

How substantial are the undesirable anticipated effects?

| JUDGEMENT                                                                                                                                                                                                                                                                                    | RESEARCH EVIDENCE                                            | ADDITIONAL CONSIDERATIONS                                          |
|----------------------------------------------------------------------------------------------------------------------------------------------------------------------------------------------------------------------------------------------------------------------------------------------|--------------------------------------------------------------|--------------------------------------------------------------------|
| <ul style="list-style-type: none"> <li><input type="radio"/> Large</li> <li><input type="radio"/> Moderate</li> <li><input type="radio"/> Small</li> <li><input checked="" type="radio"/> Trivial</li> <li><input type="radio"/> Varies</li> <li><input type="radio"/> Don't know</li> </ul> | <p>No reported or limited.</p> <p><i>See Appendix 1.</i></p> | <p>Mild symptoms of erythema, skin irritation and facial pain.</p> |

## Certainty of evidence

What is the overall certainty of the evidence of effects?

| JUDGEMENT                                                                                                                                                                                                                                                     | RESEARCH EVIDENCE                                                             | ADDITIONAL CONSIDERATIONS                                                                                                                                                                                    |
|---------------------------------------------------------------------------------------------------------------------------------------------------------------------------------------------------------------------------------------------------------------|-------------------------------------------------------------------------------|--------------------------------------------------------------------------------------------------------------------------------------------------------------------------------------------------------------|
| <ul style="list-style-type: none"> <li><input type="radio"/> Very low</li> <li><input checked="" type="radio"/> Low</li> <li><input type="radio"/> Moderate</li> <li><input type="radio"/> High</li> <li><input type="radio"/> No included studies</li> </ul> | <p>The overall quality of evidence was low.</p> <p><i>See Appendix 2.</i></p> | <p>Myofunctional therapy is not suggested as a standard/regular treatment of OSA, but only for specific cases seeking alternative treatments and who are reluctant to surgical or mechanical strategies.</p> |

## Values

Is there important uncertainty about or variability in how much people value the main outcomes?

| JUDGEMENT                                                                                                    | RESEARCH EVIDENCE                                                                               | ADDITIONAL CONSIDERATIONS                                           |
|--------------------------------------------------------------------------------------------------------------|-------------------------------------------------------------------------------------------------|---------------------------------------------------------------------|
| <ul style="list-style-type: none"> <li><input type="radio"/> Important uncertainty or variability</li> </ul> | <p>There is limited evidence available for this intervention, based on only six small RCTs.</p> | <p>Different types of patients might be an opportunity for some</p> |

|                                                                                                                                                                                                                  |                                                                                                                                                                                   |                                                                                                                                                                                                                       |
|------------------------------------------------------------------------------------------------------------------------------------------------------------------------------------------------------------------|-----------------------------------------------------------------------------------------------------------------------------------------------------------------------------------|-----------------------------------------------------------------------------------------------------------------------------------------------------------------------------------------------------------------------|
| <ul style="list-style-type: none"> <li>● Possibly important uncertainty or variability</li> <li>○ Probably no important uncertainty or variability</li> <li>○ No important uncertainty or variability</li> </ul> | <p>Moreover, this treatment offers only a small and probably temporary advantage over existing treatments and patients might reject other proven effective treatment options.</p> | <p>of them.</p> <p>Some concerns: acceptance of the chronic condition, upset with mainstream therapies.</p> <p>Some might look for the most effective treatments, other for alternative treatments like this one.</p> |
|------------------------------------------------------------------------------------------------------------------------------------------------------------------------------------------------------------------|-----------------------------------------------------------------------------------------------------------------------------------------------------------------------------------|-----------------------------------------------------------------------------------------------------------------------------------------------------------------------------------------------------------------------|

## Balance of effects

Does the balance between desirable and undesirable effects favor the intervention or the comparison?

| JUDGEMENT                                                                                                                                                                                                                                                                                                      | RESEARCH EVIDENCE                                                                                                                     | ADDITIONAL CONSIDERATIONS                                                                                                                                                                                                                 |
|----------------------------------------------------------------------------------------------------------------------------------------------------------------------------------------------------------------------------------------------------------------------------------------------------------------|---------------------------------------------------------------------------------------------------------------------------------------|-------------------------------------------------------------------------------------------------------------------------------------------------------------------------------------------------------------------------------------------|
| <ul style="list-style-type: none"> <li>○ Favors the comparison</li> <li>○ Probably favors the comparison</li> <li>○ Does not favor either the intervention or the comparison</li> <li>● Probably favors the intervention</li> <li>○ Favors the intervention</li> <li>○ Varies</li> <li>○ Don't know</li> </ul> | <p>This treatment offers only a small and probably temporary advantage over existing treatments with limited undesirable effects.</p> | <p>Data on adverse events was reported in two studies (82 patients). One reported no adverse or unexpected events in either group and the other reported mild erythema, skin irritation and facial pain compared to placebo patients.</p> |

## Resources required

How large are the resource requirements (costs)?

| JUDGEMENT                                                                                                                                                                                                                      | RESEARCH EVIDENCE                                | ADDITIONAL CONSIDERATIONS                                                                                                                                                                           |
|--------------------------------------------------------------------------------------------------------------------------------------------------------------------------------------------------------------------------------|--------------------------------------------------|-----------------------------------------------------------------------------------------------------------------------------------------------------------------------------------------------------|
| <ul style="list-style-type: none"> <li>○ Large costs</li> <li>○ Moderate costs</li> <li>○ Negligible costs and savings</li> <li>○ Moderate savings</li> <li>○ Large savings</li> <li>○ Varies</li> <li>○ Don't know</li> </ul> | <p>We did not look for studies on resources.</p> | <p>There are huge differences between health care systems throughout Europe. There are unique reimbursement strategies. Therefore, no general statements on socioeconomic aspects can be given.</p> |

## Certainty of evidence of required resources

What is the certainty of the evidence of resource requirements (costs)?

| JUDGEMENT                                                                                                                                      | RESEARCH EVIDENCE                         | ADDITIONAL CONSIDERATIONS                                                                                                                                                                    |
|------------------------------------------------------------------------------------------------------------------------------------------------|-------------------------------------------|----------------------------------------------------------------------------------------------------------------------------------------------------------------------------------------------|
| <ul style="list-style-type: none"> <li>● Very low</li> <li>○ Low</li> <li>○ Moderate</li> <li>○ High</li> <li>○ No included studies</li> </ul> | We did not look for studies on resources. | There are huge differences between health care systems throughout Europe. There are unique reimbursement strategies. Therefore, no general statements on socioeconomic aspects can be given. |

## Cost effectiveness

Does the cost-effectiveness of the intervention favor the intervention or the comparison?

| JUDGEMENT                                                                                                                                                                                                                                                                                                               | RESEARCH EVIDENCE                         | ADDITIONAL CONSIDERATIONS                                                                                                                                                                    |
|-------------------------------------------------------------------------------------------------------------------------------------------------------------------------------------------------------------------------------------------------------------------------------------------------------------------------|-------------------------------------------|----------------------------------------------------------------------------------------------------------------------------------------------------------------------------------------------|
| <ul style="list-style-type: none"> <li>○ Favors the comparison</li> <li>○ Probably favors the comparison</li> <li>○ Does not favor either the intervention or the comparison</li> <li>○ Probably favors the intervention</li> <li>○ Favors the intervention</li> <li>○ Varies</li> <li>○ No included studies</li> </ul> | We did not look for studies on resources. | There are huge differences between health care systems throughout Europe. There are unique reimbursement strategies. Therefore, no general statements on socioeconomic aspects can be given. |

## Equity

What would be the impact on health equity?

| JUDGEMENT                                                                                                                                                                                                        | RESEARCH EVIDENCE                            | ADDITIONAL CONSIDERATIONS                                                                                                                                                                                               |
|------------------------------------------------------------------------------------------------------------------------------------------------------------------------------------------------------------------|----------------------------------------------|-------------------------------------------------------------------------------------------------------------------------------------------------------------------------------------------------------------------------|
| <ul style="list-style-type: none"> <li>○ Reduced</li> <li>○ Probably reduced</li> <li>○ Probably no impact</li> <li>○ Probably increased</li> <li>○ Increased</li> <li>● Varies</li> <li>○ Don't know</li> </ul> | We did not look for studies on health equity | <p>Less problems with costs of the device compared to other PICO interventions.</p> <p>Health insurance might not cover this treatment, depends on the health care system and whether speech therapy is reimbursed.</p> |

## Acceptability

Is the intervention acceptable to key stakeholders?

| JUDGEMENT                                                                                                                                                           | RESEARCH EVIDENCE                                    | ADDITIONAL CONSIDERATIONS                                                                                                                                                                                                                                                          |
|---------------------------------------------------------------------------------------------------------------------------------------------------------------------|------------------------------------------------------|------------------------------------------------------------------------------------------------------------------------------------------------------------------------------------------------------------------------------------------------------------------------------------|
| <ul style="list-style-type: none"> <li>○ No</li> <li>○ Probably no</li> <li>○ Probably yes</li> <li>○ Yes</li> <li>● <b>Varies</b></li> <li>○ Don't know</li> </ul> | We did not look for studies assessing acceptability. | <p>For many patients it might be acceptable as they seek for alternatives.</p> <p>Acceptable for professionals (e.g. speech therapists).</p> <p>Acceptability for physicians might be reduced (currently no large clinically relevant effects, low certainty of the evidence).</p> |

## Feasibility

Is the intervention feasible to implement?

| JUDGEMENT                                                                                                                                                           | RESEARCH EVIDENCE                                  | ADDITIONAL CONSIDERATIONS                                                                |
|---------------------------------------------------------------------------------------------------------------------------------------------------------------------|----------------------------------------------------|------------------------------------------------------------------------------------------|
| <ul style="list-style-type: none"> <li>○ No</li> <li>● <b>Probably no</b></li> <li>○ Probably yes</li> <li>○ Yes</li> <li>○ Varies</li> <li>○ Don't know</li> </ul> | We did not look for studies assessing feasibility. | Not enough trained speech therapists available, experience for sleep apnoea are lacking. |

## SUMMARY OF JUDGEMENTS

|                       | JUDGEMENT                            |                                                      |                                                  |                                         |                         |        |                     |
|-----------------------|--------------------------------------|------------------------------------------------------|--------------------------------------------------|-----------------------------------------|-------------------------|--------|---------------------|
| PROBLEM               | No                                   | Probably no                                          | Probably yes                                     | <b>Yes</b>                              |                         | Varies | Don't know          |
| DESIRABLE EFFECTS     | Trivial                              | <b>Small</b>                                         | Moderate                                         | Large                                   |                         | Varies | Don't know          |
| UNDESIRABLE EFFECTS   | Large                                | Moderate                                             | Small                                            | <b>Trivial</b>                          |                         | Varies | Don't know          |
| CERTAINTY OF EVIDENCE | Very low                             | <b>Low</b>                                           | Moderate                                         | High                                    |                         |        | No included studies |
| VALUES                | Important uncertainty or variability | <b>Possibly important uncertainty or variability</b> | Probably no important uncertainty or variability | No important uncertainty or variability |                         |        |                     |
| BALANCE OF EFFECTS    | Favors the comparison                | Probably favors the comparison                       | Does not favor either the intervention or the    | <b>Probably favors the intervention</b> | Favors the intervention | Varies | Don't know          |

## JUDGEMENT

|                                             |                       |                                |                                                          |                                  |                         |               |                     |
|---------------------------------------------|-----------------------|--------------------------------|----------------------------------------------------------|----------------------------------|-------------------------|---------------|---------------------|
| RESOURCES REQUIRED                          | Large costs           | Moderate costs                 | Negligible costs and savings                             | Moderate savings                 | Large savings           | Varies        | Don't know          |
| CERTAINTY OF EVIDENCE OF REQUIRED RESOURCES | <b>Very low</b>       | Low                            | Moderate                                                 | High                             |                         |               | No included studies |
| COST EFFECTIVENESS                          | Favors the comparison | Probably favors the comparison | Does not favor either the intervention or the comparison | Probably favors the intervention | Favors the intervention | Varies        | No included studies |
| EQUITY                                      | Reduced               | Probably reduced               | Probably no impact                                       | Probably increased               | Increased               | <b>Varies</b> | Don't know          |
| ACCEPTABILITY                               | No                    | Probably no                    | Probably yes                                             | Yes                              |                         | <b>Varies</b> | Don't know          |
| FEASIBILITY                                 | No                    | <b>Probably no</b>             | Probably yes                                             | Yes                              |                         | Varies        | Don't know          |

## TYPE OF RECOMMENDATION

|                                                         |                                                              |                                                                                          |                                                          |                                                     |
|---------------------------------------------------------|--------------------------------------------------------------|------------------------------------------------------------------------------------------|----------------------------------------------------------|-----------------------------------------------------|
| Strong recommendation against the intervention<br><br>○ | Conditional recommendation against the intervention<br><br>○ | <b>Conditional recommendation for either the intervention or the comparison</b><br><br>● | Conditional recommendation for the intervention<br><br>○ | Strong recommendation for the intervention<br><br>○ |
|---------------------------------------------------------|--------------------------------------------------------------|------------------------------------------------------------------------------------------|----------------------------------------------------------|-----------------------------------------------------|

## CONCLUSIONS

### Recommendation

We do not suggest myofunctional therapy as a standard/regular treatment of OSA, but only for specific cases who seek for alternative treatments and who are reluctant to surgical or mechanical strategies (conditional recommendation, low quality of evidence).

### Justification

There is limited evidence available for this intervention, based on only six small RCTs. Moreover, this treatment offers only a small and probably temporary advantage over existing treatments and patients might reject other proven effective treatment options. Nevertheless, for many patients seeking for alternative treatment, it might be an acceptable treatment option rejecting effective treatment options. In this case, regular follow-up should be performed, similar to other treatments, in order to demonstrate efficacy. The therapy is limited by cost, feasibility and missing long-term data.

## Subgroup considerations

There are not enough trained professionals (e.g. speech therapists) and there is a concern regarding adequate training on OSA patients. Furthermore, health insurance might not cover this type of treatment, depending on the health care system and reimbursement policies.

## Implementation considerations

Availability differs due to different healthcare systems.

Trained professionals are needed in cooperation with sleep physicians as well as long-time follow-up time.

## Monitoring and evaluation

Regular at least yearly follow-up with evaluation of adherence, symptoms, quality of life, efficacy (AHI, oxygenation), contraindications (oral health), side effects.

## Research priorities

More RCTs are warranted involving a larger number of patients and longer treatment periods to determine if the beneficial effects of myofunctional therapy can be sustained over prolonged periods of time.



## APPENDICES PICO 4 A

### PICO 4a Appendix 1

| Outcomes                                                                                                                                          | Anticipated absolute effects <sup>†</sup> (95% CI)                               |                                                                | Relative effect (95% CI) | № of participants (studies) | Certainty of the evidence (GRADE) | Comments                                                                                                                                                                                                                                                                                                                                                                                                                                                                                    |
|---------------------------------------------------------------------------------------------------------------------------------------------------|----------------------------------------------------------------------------------|----------------------------------------------------------------|--------------------------|-----------------------------|-----------------------------------|---------------------------------------------------------------------------------------------------------------------------------------------------------------------------------------------------------------------------------------------------------------------------------------------------------------------------------------------------------------------------------------------------------------------------------------------------------------------------------------------|
|                                                                                                                                                   | Risk with no treatment                                                           | Risk with myofunctional therapy                                |                          |                             |                                   |                                                                                                                                                                                                                                                                                                                                                                                                                                                                                             |
| Apnoea-hypopnoea index (events/hour) (AHI) assessed with: PSG at between 6 weeks and 4 months of follow-up; Scale from 0 (best) to higher (worst) | The mean apnoea-hypopnoea index (events/hour) (AHI) was <b>24.95</b> events/hour | mean <b>8.19 events/hour lower</b> (14.27 lower to 2.11 lower) | -                        | 230 (6 RCTs)                | ⊕⊕○○<br>LOW <sup>a,b</sup>        | Additional evidence: Ieto and Torres-Castro reported results as median + interquartile ranges. For Ieto, AHI decreased in both arms (no info about significant differences between groups). For Torres-Castro, AHI increased in both arms (also no info about significant differences between groups). See supporting material for details                                                                                                                                                  |
| Sleep efficiency % assessed with: PSG at 3 months of follow-up; scale 0 (worst) to 100% (best)                                                    | The mean sleep efficiency % was <b>85.73</b> %                                   | mean <b>0.06 % lower</b> (3.79 lower to 3.67 higher)           | -                        | 121 (3 RCTs)                | ⊕⊕○○<br>LOW <sup>c</sup>          |                                                                                                                                                                                                                                                                                                                                                                                                                                                                                             |
| Sleepiness ESS assessed with: Epworth Sleepiness Scale at between 6 weeks and 4 months follow-up; Scale from 1 (best) to 24 (worst)               | The mean sleepiness ESS was <b>10.8</b> points                                   | mean <b>2.71 points lower</b> (4.97 lower to 0.45 lower)       | -                        | 230 (6 RCTs)                | ⊕⊕○○<br>LOW <sup>b,d</sup>        | Additional evidence: Ieto and Torres-Castro reported results as median + interquartile ranges. For Ieto sleepiness kept steady in the intervention arm and non-significantly, slightly improved in the control arm (not sign. between groups). Torres-Castro found similar results.                                                                                                                                                                                                         |
| Quality of life assessed with: Functional Outcomes of Sleep Questionnaire (FOSQ) + Quebec Sleep Questionnaire + SF-36 functional capacity         | see comment                                                                      | see comment                                                    | -                        | 135 (3 RCTs)                | ⊕⊕○○<br>LOW <sup>e</sup>          | QoL improved in the myofunctional therapy arm in one study. In two other studies it improved in both arms (Diaferia (SF-36): "functional capacity domain of the SF-36 improved in the speech therapy group (P < 0.03)" - - - - Randerath: "A similar pretraining to posttraining increase was observed in both groups in the score of the Functional Outcome of Sleep Questionnaire score" - - - - Torres-Castro: Quebec Sleep Questionnaire: Increased slightly (non-sign.) in both arms.) |

| Outcomes                                                                                   | Anticipated absolute effects <sup>a</sup> (95% CI) |                                 | Relative effect (95% CI) | № of participants (studies) | Certainty of the evidence (GRADE) | Comments                                                                                                                                                                                                                                                                                                                                                                                                                                                                                                                      |
|--------------------------------------------------------------------------------------------|----------------------------------------------------|---------------------------------|--------------------------|-----------------------------|-----------------------------------|-------------------------------------------------------------------------------------------------------------------------------------------------------------------------------------------------------------------------------------------------------------------------------------------------------------------------------------------------------------------------------------------------------------------------------------------------------------------------------------------------------------------------------|
|                                                                                            | Risk with no treatment                             | Risk with myofunctional therapy |                          |                             |                                   |                                                                                                                                                                                                                                                                                                                                                                                                                                                                                                                               |
| Adherence / Compliance measured subjectively with diary entries or objectively (Randerath) | see comment                                        | see comment                     | -                        | 123 (5 RCTs)                | ⊕⊕○○<br>LOW <sup>e</sup>          | Diaferia: myofunctional therapy 63%; sham control 55% - - - Guimares: intervention: exclusion of 3 pts due to low compliance, in control 5 pts - - - Ieto: "The % of adherence to the exercises according to the weekly diaries was > 75% for all pts and was on average 85% ± 8%." - - - Puhan: pts practised an average of 5.9 days a week (SD 0.86) for 25.3 minutes (SD 3.4) (were asked to do it at least 5 days a week for 20min) - - - Randerath obj.: "There were no differences in the duration of use" <sup>f</sup> |
| Adverse events                                                                             | see comment                                        | see comment                     | -                        | 82 (2 RCTs)                 | ⊕⊕○○<br>LOW <sup>e</sup>          | Puhan: "There were no adverse or unexpected events in either group." - - - Randerath: "On a scale of 0 (minimum) to 6 (maximum), treated patients scored the symptoms erythema (treated patients, 0.4; ± 0.7; placebo, 0.2 ± 1.0; P< .05), skin irritation (treated patients, 0.7 ± 1.4; placebo, 0.3 ± 1.2; P< .05), and facial pain (treated patients, 1.1 ± 1.8; placebo, 0.3 ± 1.0; P< .05) higher than did placebo patients"                                                                                             |

- a. Minus 1 for inconsistency since the statistical I<sup>2</sup> > 60%.
- b. Minus 1 for imprecision due to low number of included patients.
- c. Minus 2 for imprecision since the 95% CI suggest the possibility of both benefit and harm; only 121 patients included.
- d. Minus 1 for inconsistency since the results which were reported as 'median' only and could not be included in the statistical analysis show results potentially favouring potentially favouring the direction of control, which is contrary to the result of the meta-analysis.
- e. Minus 2 for imprecision: data not able to be analysed quantitatively, due to heterogenous reporting of results; low number of included patients.
- f. \* Randerath: in control group 9 pts lost to follow up, in intervention group 1 pt; but reasons given transparently (due to medical, professional, personal reasons).

## PICO 4a Appendix 2

| Outcomes                                                                                                                                             | Importance | Certainty of the evidence (GRADE) |
|------------------------------------------------------------------------------------------------------------------------------------------------------|------------|-----------------------------------|
| Apnoea-hypopnoea index (events/hour) (AHI)<br>assessed with: PSG at between 6 weeks and 4 months of follow-up; Scale from 0 (best) to higher (worst) | CRITICAL   | ⊕⊕○○<br>LOW <sup>a,b</sup>        |
| Sleep efficiency %<br>assessed with: PSG at 3 months of follow-up; scale 0 (worst) to 100% (best)                                                    | CRITICAL   | ⊕⊕○○<br>LOW <sup>c</sup>          |
| Sleepiness ESS<br>assessed with: Epworth Sleepiness Scale at between 6 weeks and 4 months follow-up; Scale from 1 (best) to 24 (worst)               | CRITICAL   | ⊕⊕○○<br>LOW <sup>b,d</sup>        |
| Quality of life<br>assessed with: Functional Outcomes of Sleep Questionnaire (FOSQ) + Quebec Sleep Questionnaire + SF-36 functional capacity         | CRITICAL   | ⊕⊕○○<br>LOW <sup>e</sup>          |
| Adherence / Compliance measured subjectively with dairy entries or objectively (Randerath)                                                           | CRITICAL   | ⊕⊕○○<br>LOW <sup>e</sup>          |
| Adverse events                                                                                                                                       | CRITICAL   | ⊕⊕○○<br>LOW <sup>e</sup>          |

- Minus 1 for inconsistency since the statistical  $I^2 > 60\%$ .
- Minus 1 for imprecision due to low number of included patients.
- Minus 2 for imprecision since the 95% CI suggest the possibility of both benefit and harm; only 121 patients included.
- Minus 1 for inconsistency since the results which were reported as 'median' only and could not be included in the statistical analysis show results potentially favouring the direction of control, which is contrary to the result of the meta-analysis.
- Minus 2 for imprecision: data not able to be analysed quantitatively, due to heterogeneous reporting of results; low number of included patients.

**Table e15: PICO 4b**

## QUESTION

| Should myofunctional therapy or CPAP be used for adult patients with obstructive sleep apnoea? |                                                                                                                          |
|------------------------------------------------------------------------------------------------|--------------------------------------------------------------------------------------------------------------------------|
| POPULATION:                                                                                    | Adult patients with obstructive sleep apnoea.                                                                            |
| INTERVENTION:                                                                                  | Myofunctional therapy.                                                                                                   |
| COMPARISON:                                                                                    | CPAP.                                                                                                                    |
| MAIN OUTCOMES:                                                                                 | Apnoea-hypopnoea index (events/hour) (AHI); Sleep efficiency %; Sleepiness ESS; Quality of life; Adherence / Compliance. |
| SETTING:                                                                                       |                                                                                                                          |
| PERSPECTIVE:                                                                                   |                                                                                                                          |
| BACKGROUND:                                                                                    |                                                                                                                          |
| CONFLICT OF INTERESTS:                                                                         |                                                                                                                          |

## ASSESSMENT

| Problem                                                                                                                                                                                                                                                                                         |                                                                                                                                                                                                                                                                            |                                                                                                                                              |
|-------------------------------------------------------------------------------------------------------------------------------------------------------------------------------------------------------------------------------------------------------------------------------------------------|----------------------------------------------------------------------------------------------------------------------------------------------------------------------------------------------------------------------------------------------------------------------------|----------------------------------------------------------------------------------------------------------------------------------------------|
| Is the problem a priority?                                                                                                                                                                                                                                                                      |                                                                                                                                                                                                                                                                            |                                                                                                                                              |
| JUDGEMENT                                                                                                                                                                                                                                                                                       | RESEARCH EVIDENCE                                                                                                                                                                                                                                                          | ADDITIONAL CONSIDERATIONS                                                                                                                    |
| <ul style="list-style-type: none"> <li><input type="radio"/> No</li> <li><input type="radio"/> Probably no</li> <li><input type="radio"/> Probably yes</li> <li><input checked="" type="radio"/> Yes</li> <li><input type="radio"/> Varies</li> <li><input type="radio"/> Don't know</li> </ul> | <p>CPAP is effective in the treatment of severe as well as of mild OSA, but its acceptability may be more problematic for patients with mild to moderate forms of this disorder. Myofunctional therapy is still a poorly known alternative therapy for these patients.</p> | <p>Technique of administration of myofunctional therapy is not standardised. Outcomes could differ depending on administration modality.</p> |
| Desirable Effects                                                                                                                                                                                                                                                                               |                                                                                                                                                                                                                                                                            |                                                                                                                                              |
| How substantial are the desirable anticipated effects?                                                                                                                                                                                                                                          |                                                                                                                                                                                                                                                                            |                                                                                                                                              |

| JUDGEMENT                                                                                                                                                                                         | RESEARCH EVIDENCE                                                                                                                                                                                                                                                                                                                                                                  | ADDITIONAL CONSIDERATIONS                                                                                                  |
|---------------------------------------------------------------------------------------------------------------------------------------------------------------------------------------------------|------------------------------------------------------------------------------------------------------------------------------------------------------------------------------------------------------------------------------------------------------------------------------------------------------------------------------------------------------------------------------------|----------------------------------------------------------------------------------------------------------------------------|
| <ul style="list-style-type: none"> <li>○ Trivial</li> <li>● Small</li> <li>○ Moderate</li> <li>○ Large</li> <li>○ Varies</li> <li>○ Don't know</li> </ul>                                         | <p>AHI and subjective sleepiness improved with both therapies. Quality of life improved with myofunctional therapy but not with CPAP. Subjectively reported good adherence with myofunctional therapy.</p> <p><i>See Appendix 1.</i></p>                                                                                                                                           | <p>Single RCT, potentially underpowered.</p> <p>Both arms improved. Difference between treatment effects not analysed.</p> |
| <h2>Undesirable Effects</h2> <p>How substantial are the undesirable anticipated effects?</p>                                                                                                      |                                                                                                                                                                                                                                                                                                                                                                                    |                                                                                                                            |
| JUDGEMENT                                                                                                                                                                                         | RESEARCH EVIDENCE                                                                                                                                                                                                                                                                                                                                                                  | ADDITIONAL CONSIDERATIONS                                                                                                  |
| <ul style="list-style-type: none"> <li>○ Large</li> <li>● Moderate</li> <li>○ Small</li> <li>○ Trivial</li> <li>○ Varies</li> <li>○ Don't know</li> </ul>                                         | <p>Residual AHI after therapy apparently higher with myofunctional therapy (difference in effect non tested statistically).</p> <p><i>See Appendix 1.</i></p>                                                                                                                                                                                                                      | <p>A limited correction of AHI could result in insufficient protection against OSA complications.</p>                      |
| <h2>Certainty of evidence</h2> <p>What is the overall certainty of the evidence of effects?</p>                                                                                                   |                                                                                                                                                                                                                                                                                                                                                                                    |                                                                                                                            |
| JUDGEMENT                                                                                                                                                                                         | RESEARCH EVIDENCE                                                                                                                                                                                                                                                                                                                                                                  | ADDITIONAL CONSIDERATIONS                                                                                                  |
| <ul style="list-style-type: none"> <li>○ Very low</li> <li>● Low</li> <li>○ Moderate</li> <li>○ High</li> <li>○ No included studies</li> </ul>                                                    | <p>The overall quality of evidence was low.</p> <p><i>See Appendix 2</i></p>                                                                                                                                                                                                                                                                                                       | <p>Only one RCT is available, with a small number of patients.</p>                                                         |
| <h2>Values</h2> <p>Is there important uncertainty about or variability in how much people value the main outcomes?</p>                                                                            |                                                                                                                                                                                                                                                                                                                                                                                    |                                                                                                                            |
| JUDGEMENT                                                                                                                                                                                         | RESEARCH EVIDENCE                                                                                                                                                                                                                                                                                                                                                                  | ADDITIONAL CONSIDERATIONS                                                                                                  |
| <ul style="list-style-type: none"> <li>○ Important uncertainty or variability</li> <li>● Possibly important uncertainty or variability</li> <li>○ Probably no important uncertainty or</li> </ul> | <p>Although some patients may prefer myofunctional therapy to CPAP, average compliance to myofunctional therapy may not be better than with CPAP. On the other hand, in compliant patients correction of respiratory disorders with myofunctional therapy is unlikely to be as good as with CPAP. The panel assumes possible uncertainty/ variability There is uncertainty how</p> | <p>See PICO 4a.</p> <p>Predictors of better compliance with one therapy should be</p>                                      |

|                                                          |                                                                                                                                                                                         |             |
|----------------------------------------------------------|-----------------------------------------------------------------------------------------------------------------------------------------------------------------------------------------|-------------|
| variability<br>○ No important uncertainty or variability | patients and physician value myofunctional therapy. Some may prefer a non-CPAP approach, while others may prefer the more effective suppression of respiratory disturbances under CPAP. | identified. |
|----------------------------------------------------------|-----------------------------------------------------------------------------------------------------------------------------------------------------------------------------------------|-------------|

**Balance of effects**  
Does the balance between desirable and undesirable effects favor the intervention or the comparison?

| JUDGEMENT                                                                                                                                                                                                                                                                                                      | RESEARCH EVIDENCE                                                                                                                                                     | ADDITIONAL CONSIDERATIONS                                                               |
|----------------------------------------------------------------------------------------------------------------------------------------------------------------------------------------------------------------------------------------------------------------------------------------------------------------|-----------------------------------------------------------------------------------------------------------------------------------------------------------------------|-----------------------------------------------------------------------------------------|
| <ul style="list-style-type: none"> <li>○ Favors the comparison</li> <li>● Probably favors the comparison</li> <li>○ Does not favor either the intervention or the comparison</li> <li>○ Probably favors the intervention</li> <li>○ Favors the intervention</li> <li>○ Varies</li> <li>○ Don't know</li> </ul> | Myofunctional therapy offers symptomatic and quality of life improvement, with limited undesirable effects, while residual AHI is apparently higher compared to CPAP: | Effects of myofunctional therapy on blood pressure of OSA patients are not yet studied. |

**Resources required**  
How large are the resource requirements (costs)?

| JUDGEMENT                                                                                                                                                                                                                      | RESEARCH EVIDENCE                         | ADDITIONAL CONSIDERATIONS                                                                                                                                                                    |
|--------------------------------------------------------------------------------------------------------------------------------------------------------------------------------------------------------------------------------|-------------------------------------------|----------------------------------------------------------------------------------------------------------------------------------------------------------------------------------------------|
| <ul style="list-style-type: none"> <li>○ Large costs</li> <li>○ Moderate costs</li> <li>○ Negligible costs and savings</li> <li>○ Moderate savings</li> <li>○ Large savings</li> <li>○ Varies</li> <li>○ Don't know</li> </ul> | We did not look for studies on resources. | There are huge differences between health care systems throughout Europe. There are unique reimbursement strategies. Therefore, no general statements on socioeconomic aspects can be given. |

**Certainty of evidence of required resources**  
What is the certainty of the evidence of resource requirements (costs)?

| JUDGEMENT | RESEARCH EVIDENCE | ADDITIONAL CONSIDERATIONS |
|-----------|-------------------|---------------------------|
|-----------|-------------------|---------------------------|

|                                                                                                                                                |                                           |                                                                                                                                                                                              |
|------------------------------------------------------------------------------------------------------------------------------------------------|-------------------------------------------|----------------------------------------------------------------------------------------------------------------------------------------------------------------------------------------------|
| <ul style="list-style-type: none"> <li>● Very low</li> <li>○ Low</li> <li>○ Moderate</li> <li>○ High</li> <li>○ No included studies</li> </ul> | We did not look for studies on resources. | There are huge differences between health care systems throughout Europe. There are unique reimbursement strategies. Therefore, no general statements on socioeconomic aspects can be given. |
|------------------------------------------------------------------------------------------------------------------------------------------------|-------------------------------------------|----------------------------------------------------------------------------------------------------------------------------------------------------------------------------------------------|

**Cost effectiveness**  
Does the cost-effectiveness of the intervention favor the intervention or the comparison?

| JUDGEMENT                                                                                                                                                                                                                                                                                                               | RESEARCH EVIDENCE                         | ADDITIONAL CONSIDERATIONS                                                                                                                                                                    |
|-------------------------------------------------------------------------------------------------------------------------------------------------------------------------------------------------------------------------------------------------------------------------------------------------------------------------|-------------------------------------------|----------------------------------------------------------------------------------------------------------------------------------------------------------------------------------------------|
| <ul style="list-style-type: none"> <li>● Favors the comparison</li> <li>○ Probably favors the comparison</li> <li>○ Does not favor either the intervention or the comparison</li> <li>○ Probably favors the intervention</li> <li>○ Favors the intervention</li> <li>○ Varies</li> <li>○ No included studies</li> </ul> | We did not look for studies on resources. | There are huge differences between health care systems throughout Europe. There are unique reimbursement strategies. Therefore, no general statements on socioeconomic aspects can be given. |

**Equity**  
What would be the impact on health equity?

| JUDGEMENT                                                                                                                                                                                                        | RESEARCH EVIDENCE                             | ADDITIONAL CONSIDERATIONS |
|------------------------------------------------------------------------------------------------------------------------------------------------------------------------------------------------------------------|-----------------------------------------------|---------------------------|
| <ul style="list-style-type: none"> <li>○ Reduced</li> <li>○ Probably reduced</li> <li>○ Probably no impact</li> <li>○ Probably increased</li> <li>○ Increased</li> <li>● Varies</li> <li>○ Don't know</li> </ul> | We did not look for studies on health equity. | See PICO 4a.              |

**Acceptability**  
Is the intervention acceptable to key stakeholders?

| JUDGEMENT                                                                     | RESEARCH EVIDENCE                                    | ADDITIONAL CONSIDERATIONS |
|-------------------------------------------------------------------------------|------------------------------------------------------|---------------------------|
| <ul style="list-style-type: none"> <li>○ No</li> <li>○ Probably no</li> </ul> | We did not look for studies assessing acceptability. | See PICO 4a.              |

|                                                                                                                                                              |                                                    |                                                                                                                                                                                                                                         |
|--------------------------------------------------------------------------------------------------------------------------------------------------------------|----------------------------------------------------|-----------------------------------------------------------------------------------------------------------------------------------------------------------------------------------------------------------------------------------------|
| <ul style="list-style-type: none"> <li>○ Probably yes</li> <li>○ Yes</li> <li>● Varies</li> <li>○ Don't know</li> </ul>                                      |                                                    | <p>Long term adherence to CPAP: not unsubstantial numbers</p> <p>25% after 3 months, after 12 months: 50% non-adherence to CPAP</p> <p>30% in RCT might not reflect current practice, people in the trial might be highly selected.</p> |
| <b>Feasibility</b>                                                                                                                                           |                                                    |                                                                                                                                                                                                                                         |
| Is the intervention feasible to implement?                                                                                                                   |                                                    |                                                                                                                                                                                                                                         |
| <b>JUDGEMENT</b>                                                                                                                                             | <b>RESEARCH EVIDENCE</b>                           | <b>ADDITIONAL CONSIDERATIONS</b>                                                                                                                                                                                                        |
| <ul style="list-style-type: none"> <li>○ No</li> <li>○ Probably no</li> <li>○ Probably yes</li> <li>○ Yes</li> <li>○ Varies</li> <li>○ Don't know</li> </ul> | We did not look for studies assessing feasibility. | <p>See Pico 4a.</p> <p>No problem with CPAP.</p>                                                                                                                                                                                        |

## SUMMARY OF JUDGEMENTS

|                              | JUDGEMENT                            |                                                      |                                                          |                                         |                         |        |                     |
|------------------------------|--------------------------------------|------------------------------------------------------|----------------------------------------------------------|-----------------------------------------|-------------------------|--------|---------------------|
| <b>PROBLEM</b>               | No                                   | Probably no                                          | Probably yes                                             | <b>Yes</b>                              |                         | Varies | Don't know          |
| <b>DESIRABLE EFFECTS</b>     | Trivial                              | <b>Small</b>                                         | Moderate                                                 | Large                                   |                         | Varies | Don't know          |
| <b>UNDESIRABLE EFFECTS</b>   | Large                                | <b>Moderate</b>                                      | Small                                                    | Trivial                                 |                         | Varies | Don't know          |
| <b>CERTAINTY OF EVIDENCE</b> | Very low                             | <b>Low</b>                                           | Moderate                                                 | High                                    |                         |        | No included studies |
| <b>VALUES</b>                | Important uncertainty or variability | <b>Possibly important uncertainty or variability</b> | Probably no important uncertainty or variability         | No important uncertainty or variability |                         |        |                     |
| <b>BALANCE OF EFFECTS</b>    | Favors the comparison                | <b>Probably favors the comparison</b>                | Does not favor either the intervention or the comparison | Probably favors the intervention        | Favors the intervention | Varies | Don't know          |



## JUDGEMENT

|                                                    |                              |                                |                                                          |                                  |                         |               |                     |
|----------------------------------------------------|------------------------------|--------------------------------|----------------------------------------------------------|----------------------------------|-------------------------|---------------|---------------------|
| <b>RESOURCES REQUIRED</b>                          | Large costs                  | Moderate costs                 | Negligible costs and savings                             | Moderate savings                 | Large savings           | Varies        | Don't know          |
| <b>CERTAINTY OF EVIDENCE OF REQUIRED RESOURCES</b> | <b>Very low</b>              | Low                            | Moderate                                                 | High                             |                         |               | No included studies |
| <b>COST EFFECTIVENESS</b>                          | <b>Favors the comparison</b> | Probably favors the comparison | Does not favor either the intervention or the comparison | Probably favors the intervention | Favors the intervention | Varies        | No included studies |
| <b>EQUITY</b>                                      | Reduced                      | Probably reduced               | Probably no impact                                       | Probably increased               | Increased               | <b>Varies</b> | Don't know          |
| <b>ACCEPTABILITY</b>                               | No                           | Probably no                    | Probably yes                                             | Yes                              |                         | <b>Varies</b> | Don't know          |
| <b>FEASIBILITY</b>                                 | No                           | Probably no                    | Probably yes                                             | Yes                              |                         | Varies        | Don't know          |

## TYPE OF RECOMMENDATION

|                                                                         |                                                                                                |                                                                                                   |                                                                          |                                                                     |
|-------------------------------------------------------------------------|------------------------------------------------------------------------------------------------|---------------------------------------------------------------------------------------------------|--------------------------------------------------------------------------|---------------------------------------------------------------------|
| Strong recommendation against the intervention<br><input type="radio"/> | <b>Conditional recommendation against the intervention</b><br><input checked="" type="radio"/> | Conditional recommendation for either the intervention or the comparison<br><input type="radio"/> | Conditional recommendation for the intervention<br><input type="radio"/> | Strong recommendation for the intervention<br><input type="radio"/> |
|-------------------------------------------------------------------------|------------------------------------------------------------------------------------------------|---------------------------------------------------------------------------------------------------|--------------------------------------------------------------------------|---------------------------------------------------------------------|

## CONCLUSIONS

### Recommendation

We suggest using CPAP instead of myofunctional therapy for adult patients (conditional recommendation, low quality of evidence)

### Justification

Currently, limited evidence is available for this intervention based on one RCT only. In this RCT, the panel determined that the benefit of the intervention as compared to CPAP was of similar effect size for sleepiness, but lower for AHI with no statistical tests performed to compare the in-group differences. However, no significant side effects were reported. The low objective compliance to CPAP could explain the significant but limited beneficial effects in the CPAP arm; adequate CPAP adherence, as in standard practice, could even further contribute to the benefits observed. The panel concluded that in summary of the above the comparison group (CPAP) was favoured.

## Subgroup considerations

Specific subcohorts of patients could value several outcomes of the intervention, particularly when they have discontinued CPAP therapy. The intervention has a limited feasibility due to insufficient availability of trained speech therapists who, in addition, often lack experience for sleep apnoea. Health insurance might not cover this treatment. It is currently not clear whether, and if so for how long, any interventional treatment effects are maintained.

## Implementation considerations

Training and interest of physiotherapists, as well as cooperation between physiotherapists and sleep physicians, need to be implemented.

## Monitoring and evaluation

Regular follow-up to re-inforce adherence to therapy and evaluate its efficacy over time.

## Research priorities

Long-term studies to evaluate feasibility of long-term treatment by myofunctional therapy and RCTs to explore effects of therapy not only on sleep variables, but also on the natural history of patients with obstructive sleep apnea under different treatments are needed.

## APPENDICES PICO 4B

### PICO 4b Appendix 1

| Outcomes                                                                                                                         | Anticipated absolute effects <sup>a</sup> (95% CI) |                                 | Relative effect (95% CI) | No of participants (studies) | Certainty of the evidence (GRADE) | Comments                                                                                                                                                                     |
|----------------------------------------------------------------------------------------------------------------------------------|----------------------------------------------------|---------------------------------|--------------------------|------------------------------|-----------------------------------|------------------------------------------------------------------------------------------------------------------------------------------------------------------------------|
|                                                                                                                                  | Risk with CPAP                                     | Risk with myofunctional therapy |                          |                              |                                   |                                                                                                                                                                              |
| Apnoea-hypopnoea index (events/hour) (AHI)<br>assessed with: PSG at 3 months follow-up;<br>Scale from 0 (best) to higher (worst) | see comment                                        | see comment                     | -                        | 54 (1 RCT)                   | ⊕⊕○○<br>LOW <sup>a</sup>          | speech therapy: decrease from 28 ± 22.7 to 13.9 ± 18.5; p<0.001 - -<br>- CPAP: decrease from 34.4 ± 22.4 to 4.3 ± 4.0; p<0.001 - - -<br>between group difference: not given  |
| Sleep efficiency %<br>assessed with: PSG at 3 months follow-up;<br>Scale from 0 (worst) to 100 (best)                            | see comment                                        | see comment                     | -                        | 54 (1 RCT)                   | ⊕⊕○○<br>LOW <sup>a</sup>          | speech therapy: decrease from 85.7 ± 9.5 to 84.5 ± 13.1 - - - CPAP:<br>slight decrease from 86.9 ± 9.9 to 86.6 ± 7.8 - - - between groups:<br>not sign.                      |
| Sleepiness ESS<br>assessed with: Epworth Sleepiness Scale<br>at 3 months follow-up; Scale from 1 (best)<br>to 24 (worst)         | see comment                                        | see comment                     | -                        | 54 (1 RCT)                   | ⊕⊕○○<br>LOW <sup>a</sup>          | speech therapy: decrease from 13.7 ± 3.2 to 7.5 ± 3.7; p < 0.001 - - -<br>CPAP decrease from 12.0 ± 2.1 to 7.2 ± 3.6; p < 0.001 - - - between<br>group differences not given |
| Quality of life<br>assessed with: SF-36 functional capacity at<br>3 months follow-up; scale 0 = worst to 100<br>= best           | see comment                                        | see comment                     | -                        | 54 (1 RCT)                   | ⊕⊕○○<br>LOW <sup>a</sup>          | "functional capacity domain of the SF-36 improved in the speech<br>therapy group (P < 0.03)"                                                                                 |
| Adherence / Compliance                                                                                                           | see comment                                        | see comment                     | -                        | 54 (1 RCT)                   | ⊕⊕○○<br>LOW <sup>a</sup>          | speech therapy: 63% (subjectively); CPAP: 30% (objectively)                                                                                                                  |

a. Minus 2 for imprecision due to low number of patients and due of reporting of results quantitative analysis was not possible.

## PICO 4b Appendix 2

| Outcomes                                                                                                                                                          | Importance | Certainty of the evidence (GRADE)                           |
|-------------------------------------------------------------------------------------------------------------------------------------------------------------------|------------|-------------------------------------------------------------|
| <p style="text-align: center;">Apnoea-hypopnoea index (events/hour) (AHI)<br/>assessed with: PSG at 3 months follow-up; Scale from 0 (best) to higher (worst)</p> | CRITICAL   | <p style="text-align: center;">⊕⊕○○<br/>LOW<sup>a</sup></p> |
| <p style="text-align: center;">Sleep efficiency %<br/>assessed with: PSG at 3 months follow-up; Scale from 0 (worst) to 100 (best)</p>                            | CRITICAL   | <p style="text-align: center;">⊕⊕○○<br/>LOW<sup>a</sup></p> |
| <p style="text-align: center;">Sleepiness ESS<br/>assessed with: Epworth Sleepiness Scale at 3 months follow-up; Scale from 1 (best) to 24 (worst)</p>            | CRITICAL   | <p style="text-align: center;">⊕⊕○○<br/>LOW<sup>a</sup></p> |
| <p style="text-align: center;">Quality of life<br/>assessed with: SF-36 functional capacity at 3 months follow-up; scale 0 = worst to 100 = best</p>              | CRITICAL   | <p style="text-align: center;">⊕⊕○○<br/>LOW<sup>a</sup></p> |
| <p style="text-align: center;">Adherence / Compliance</p>                                                                                                         | CRITICAL   | <p style="text-align: center;">⊕⊕○○<br/>LOW<sup>a</sup></p> |

a. Minus 2 for imprecision due to low number of patients and due of reporting of results quantitative analysis was not possible.

**Table e16: PICO 5**

## QUESTION

| Should maxillo- mandibular osteotomy or CPAP be used for adult patients with obstructive sleep apnoea? |                                                                   |
|--------------------------------------------------------------------------------------------------------|-------------------------------------------------------------------|
| POPULATION:                                                                                            | Adult patients with obstructive sleep apnoea.                     |
| INTERVENTION:                                                                                          | Maxillo-mandibular osteotomy.                                     |
| COMPARISON:                                                                                            | CPAP.                                                             |
| MAIN OUTCOMES:                                                                                         | Apnoea-hypopnoea index; Sleepiness; Satisfaction; Adverse events. |
| SETTING:                                                                                               |                                                                   |
| PERSPECTIVE:                                                                                           |                                                                   |
| BACKGROUND:                                                                                            |                                                                   |
| CONFLICT OF INTERESTS:                                                                                 |                                                                   |

## ASSESSMENT

| Problem                                                                                                                                                                                                                                                                                         |                                                                                                                                                                                                                                                                                              |                           |
|-------------------------------------------------------------------------------------------------------------------------------------------------------------------------------------------------------------------------------------------------------------------------------------------------|----------------------------------------------------------------------------------------------------------------------------------------------------------------------------------------------------------------------------------------------------------------------------------------------|---------------------------|
| Is the problem a priority?                                                                                                                                                                                                                                                                      |                                                                                                                                                                                                                                                                                              |                           |
| JUDGEMENT                                                                                                                                                                                                                                                                                       | RESEARCH EVIDENCE                                                                                                                                                                                                                                                                            | ADDITIONAL CONSIDERATIONS |
| <ul style="list-style-type: none"> <li><input type="radio"/> No</li> <li><input type="radio"/> Probably no</li> <li><input type="radio"/> Probably yes</li> <li><input checked="" type="radio"/> Yes</li> <li><input type="radio"/> Varies</li> <li><input type="radio"/> Don't know</li> </ul> | <p>MMO has been pointed out as a highly effective therapy for abolishing obstructive apnoeas, but most of the present knowledge on its effects is based on uncontrolled studies on case series. Besides, invasiveness and complexity of the technique have prevented its widespread use.</p> |                           |
| Desirable Effects                                                                                                                                                                                                                                                                               |                                                                                                                                                                                                                                                                                              |                           |
| How substantial are the desirable anticipated effects?                                                                                                                                                                                                                                          |                                                                                                                                                                                                                                                                                              |                           |

| JUDGEMENT                                                                                                                                                                                         | RESEARCH EVIDENCE                                                                                                                                                           | ADDITIONAL CONSIDERATIONS                                                                                                                                                                                                         |
|---------------------------------------------------------------------------------------------------------------------------------------------------------------------------------------------------|-----------------------------------------------------------------------------------------------------------------------------------------------------------------------------|-----------------------------------------------------------------------------------------------------------------------------------------------------------------------------------------------------------------------------------|
| <ul style="list-style-type: none"> <li>● Trivial</li> <li>○ Small</li> <li>○ Moderate</li> <li>○ Large</li> <li>○ Varies</li> <li>○ Don't know</li> </ul>                                         | <p>Improvement in AHI and sleepiness did not differ between MMO and CPAP. Average degree of satisfaction was similar as well.</p> <p><i>See Appendix 1</i></p>              | <p>Occasionally, dissatisfaction with MMO could derive from moderate to severe side effects, which are less likely to occur with CPAP.</p>                                                                                        |
| <h2>Undesirable Effects</h2> <p>How substantial are the undesirable anticipated effects?</p>                                                                                                      |                                                                                                                                                                             |                                                                                                                                                                                                                                   |
| JUDGEMENT                                                                                                                                                                                         | RESEARCH EVIDENCE                                                                                                                                                           | ADDITIONAL CONSIDERATIONS                                                                                                                                                                                                         |
| <ul style="list-style-type: none"> <li>○ Large</li> <li>● Moderate</li> <li>○ Small</li> <li>○ Trivial</li> <li>○ Varies</li> <li>○ Don't know</li> </ul>                                         | <p>One acute episode of dyspnoea due to tracheotomy tube crusting after surgery. Minor side effects of variable duration in all patients.</p> <p><i>See Appendix 1.</i></p> | <p>Additional orthodontic work may be required.</p> <p>The TF prioritised the magnitude of the AEs when making the judgment.</p>                                                                                                  |
| <h2>Certainty of evidence</h2> <p>What is the overall certainty of the evidence of effects?</p>                                                                                                   |                                                                                                                                                                             |                                                                                                                                                                                                                                   |
| JUDGEMENT                                                                                                                                                                                         | RESEARCH EVIDENCE                                                                                                                                                           | ADDITIONAL CONSIDERATIONS                                                                                                                                                                                                         |
| <ul style="list-style-type: none"> <li>● Very low</li> <li>○ Low</li> <li>○ Moderate</li> <li>○ High</li> <li>○ No included studies</li> </ul>                                                    | <p>The overall quality of evidence was very low.</p> <p><i>See Appendix 2.</i></p>                                                                                          | <p>Only 1 RCT was available.</p> <p>Trial includes only patients with high AHI (&gt;30). In patients with less severe disease, efficacy would likely be the same as what was observed in the trial, but evidence is indirect.</p> |
| <h2>Values</h2> <p>Is there important uncertainty about or variability in how much people value the main outcomes?</p>                                                                            |                                                                                                                                                                             |                                                                                                                                                                                                                                   |
| JUDGEMENT                                                                                                                                                                                         | RESEARCH EVIDENCE                                                                                                                                                           | ADDITIONAL CONSIDERATIONS                                                                                                                                                                                                         |
| <ul style="list-style-type: none"> <li>● Important uncertainty or variability</li> <li>○ Possibly important uncertainty or variability</li> <li>○ Probably no important uncertainty or</li> </ul> | <p>Intervention assessed as satisfactory by most patients, but large interindividual differences cannot be excluded.</p>                                                    | <p>Variability could be introduced by age (younger may prefer surgery), underlying unfavourable profile of the face.</p> <p>Also important uncertainty when considering patients with</p>                                         |

|                                                                                                                                                                                                                                                                                                                |                                                                                                                                                           |                                                                                                                                                                                              |
|----------------------------------------------------------------------------------------------------------------------------------------------------------------------------------------------------------------------------------------------------------------------------------------------------------------|-----------------------------------------------------------------------------------------------------------------------------------------------------------|----------------------------------------------------------------------------------------------------------------------------------------------------------------------------------------------|
| variability<br>○ No important uncertainty or variability                                                                                                                                                                                                                                                       |                                                                                                                                                           | high AHI (>30) and lower AHI (<30). Lower AHI might value potential for AEs as more important (similar to patients who are not experiencing sleepiness).                                     |
| <b>Balance of effects</b><br>Does the balance between desirable and undesirable effects favor the intervention or the comparison?                                                                                                                                                                              |                                                                                                                                                           |                                                                                                                                                                                              |
| <b>JUDGEMENT</b>                                                                                                                                                                                                                                                                                               | <b>RESEARCH EVIDENCE</b>                                                                                                                                  | <b>ADDITIONAL CONSIDERATIONS</b>                                                                                                                                                             |
| <ul style="list-style-type: none"> <li>○ Favors the comparison</li> <li>● Probably favors the comparison</li> <li>○ Does not favor either the intervention or the comparison</li> <li>○ Probably favors the intervention</li> <li>○ Favors the intervention</li> <li>○ Varies</li> <li>○ Don't know</li> </ul> | Resolution of nocturnal respiratory disorders substantially similar with MMO and CPAP, but moderate side effects during the trial observed only with MMO. | Probably favours CPAP, because trivial desirable but moderate undesirable. Recognises some variability in values and preferences.                                                            |
| <b>Resources required</b><br>How large are the resource requirements (costs)?                                                                                                                                                                                                                                  |                                                                                                                                                           |                                                                                                                                                                                              |
| <b>JUDGEMENT</b>                                                                                                                                                                                                                                                                                               | <b>RESEARCH EVIDENCE</b>                                                                                                                                  | <b>ADDITIONAL CONSIDERATIONS</b>                                                                                                                                                             |
| <ul style="list-style-type: none"> <li>○ Large costs</li> <li>○ Moderate costs</li> <li>○ Negligible costs and savings</li> <li>○ Moderate savings</li> <li>○ Large savings</li> <li>● Varies</li> <li>○ Don't know</li> </ul>                                                                                 | We did not look for studies on resources.                                                                                                                 | There are huge differences between health care systems throughout Europe. There are unique reimbursement strategies. Therefore, no general statements on socioeconomic aspects can be given. |
| <b>Certainty of evidence of required resources</b><br>What is the certainty of the evidence of resource requirements (costs)?                                                                                                                                                                                  |                                                                                                                                                           |                                                                                                                                                                                              |
| <b>JUDGEMENT</b>                                                                                                                                                                                                                                                                                               | <b>RESEARCH EVIDENCE</b>                                                                                                                                  | <b>ADDITIONAL CONSIDERATIONS</b>                                                                                                                                                             |
| <ul style="list-style-type: none"> <li>○ Very low</li> <li>○ Low</li> <li>○ Moderate</li> <li>○ High</li> <li>● No included studies</li> </ul>                                                                                                                                                                 | We did not look for studies on resources.                                                                                                                 | There are huge differences between health care systems throughout Europe. There are unique reimbursement strategies. Therefore, no general statements on socioeconomic aspects can be given. |

## Cost effectiveness

Does the cost-effectiveness of the intervention favor the intervention or the comparison?

| JUDGEMENT                                                                                                                                                                                                                                                                                                               | RESEARCH EVIDENCE                                         | ADDITIONAL CONSIDERATIONS                                                                                                                                                                              |
|-------------------------------------------------------------------------------------------------------------------------------------------------------------------------------------------------------------------------------------------------------------------------------------------------------------------------|-----------------------------------------------------------|--------------------------------------------------------------------------------------------------------------------------------------------------------------------------------------------------------|
| <ul style="list-style-type: none"> <li>○ Favors the comparison</li> <li>○ Probably favors the comparison</li> <li>○ Does not favor either the intervention or the comparison</li> <li>○ Probably favors the intervention</li> <li>○ Favors the intervention</li> <li>○ Varies</li> <li>● No included studies</li> </ul> | <p>We did not look for studies on cost-effectiveness.</p> | <p>There are huge differences between health care systems throughout Europe. There are unique reimbursement strategies. Therefore, no general statements on socioecioionomic aspects can be given.</p> |

## Equity

What would be the impact on health equity?

| JUDGEMENT                                                                                                                                                                                                        | RESEARCH EVIDENCE                                    | ADDITIONAL CONSIDERATIONS                              |
|------------------------------------------------------------------------------------------------------------------------------------------------------------------------------------------------------------------|------------------------------------------------------|--------------------------------------------------------|
| <ul style="list-style-type: none"> <li>○ Reduced</li> <li>● Probably reduced</li> <li>○ Probably no impact</li> <li>○ Probably increased</li> <li>○ Increased</li> <li>○ Varies</li> <li>○ Don't know</li> </ul> | <p>We did not look for studies on health equity.</p> | <p>Availability and cost may be a problem for MMO.</p> |

## Acceptability

Is the intervention acceptable to key stakeholders?

| JUDGEMENT                                                                                                                                                    | RESEARCH EVIDENCE                                           | ADDITIONAL CONSIDERATIONS                                                 |
|--------------------------------------------------------------------------------------------------------------------------------------------------------------|-------------------------------------------------------------|---------------------------------------------------------------------------|
| <ul style="list-style-type: none"> <li>○ No</li> <li>○ Probably no</li> <li>● Probably yes</li> <li>○ Yes</li> <li>○ Varies</li> <li>○ Don't know</li> </ul> | <p>We did not look for studies assessing acceptability.</p> | <p>Patients: May vary.<br/>Clinicians: Yes.<br/>Health insurers: Yes.</p> |

## Feasibility

Is the intervention feasible to implement?



| JUDGEMENT                                                                                                                                                    | RESEARCH EVIDENCE                                  | ADDITIONAL CONSIDERATIONS                                                                             |
|--------------------------------------------------------------------------------------------------------------------------------------------------------------|----------------------------------------------------|-------------------------------------------------------------------------------------------------------|
| <ul style="list-style-type: none"> <li>○ No</li> <li>○ Probably no</li> <li>● Probably yes</li> <li>○ Yes</li> <li>○ Varies</li> <li>○ Don't know</li> </ul> | We did not look for studies assessing feasibility. | <p>In some locations, limited specialists are available.</p> <p>Accessibility varies on location.</p> |

## SUMMARY OF JUDGEMENTS

|                                             | JUDGEMENT                                   |                                               |                                                          |                                         |                         |               |                            |
|---------------------------------------------|---------------------------------------------|-----------------------------------------------|----------------------------------------------------------|-----------------------------------------|-------------------------|---------------|----------------------------|
| PROBLEM                                     | No                                          | Probably no                                   | Probably yes                                             | <b>Yes</b>                              |                         | Varies        | Don't know                 |
| DESIRABLE EFFECTS                           | <b>Trivial</b>                              | Small                                         | Moderate                                                 | Large                                   |                         | Varies        | Don't know                 |
| UNDESIRABLE EFFECTS                         | Large                                       | <b>Moderate</b>                               | Small                                                    | Trivial                                 |                         | Varies        | Don't know                 |
| CERTAINTY OF EVIDENCE                       | <b>Very low</b>                             | Low                                           | Moderate                                                 | High                                    |                         |               | No included studies        |
| VALUES                                      | <b>Important uncertainty or variability</b> | Possibly important uncertainty or variability | Probably no important uncertainty or variability         | No important uncertainty or variability |                         |               |                            |
| BALANCE OF EFFECTS                          | Favors the comparison                       | <b>Probably favors the comparison</b>         | Does not favor either the intervention or the comparison | Probably favors the intervention        | Favors the intervention | Varies        | Don't know                 |
| RESOURCES REQUIRED                          | Large costs                                 | Moderate costs                                | Negligible costs and savings                             | Moderate savings                        | Large savings           | <b>Varies</b> | Don't know                 |
| CERTAINTY OF EVIDENCE OF REQUIRED RESOURCES | Very low                                    | Low                                           | Moderate                                                 | High                                    |                         |               | <b>No included studies</b> |
| COST EFFECTIVENESS                          | Favors the comparison                       | Probably favors the comparison                | Does not favor either the intervention or the comparison | Probably favors the intervention        | Favors the intervention | Varies        | <b>No included studies</b> |
| EQUITY                                      | Reduced                                     | <b>Probably reduced</b>                       | Probably no impact                                       | Probably increased                      | Increased               | Varies        | Don't know                 |

## JUDGEMENT

|               |    |             |                     |     |  |        |            |
|---------------|----|-------------|---------------------|-----|--|--------|------------|
| ACCEPTABILITY | No | Probably no | <b>Probably yes</b> | Yes |  | Varies | Don't know |
| FEASIBILITY   | No | Probably no | <b>Probably yes</b> | Yes |  | Varies | Don't know |

## TYPE OF RECOMMENDATION

|                                                                         |                                                                              |                                                                                                                      |                                                                          |                                                                     |
|-------------------------------------------------------------------------|------------------------------------------------------------------------------|----------------------------------------------------------------------------------------------------------------------|--------------------------------------------------------------------------|---------------------------------------------------------------------|
| Strong recommendation against the intervention<br><input type="radio"/> | Conditional recommendation against the intervention<br><input type="radio"/> | <b>Conditional recommendation for either the intervention or the comparison<br/><input checked="" type="radio"/></b> | Conditional recommendation for the intervention<br><input type="radio"/> | Strong recommendation for the intervention<br><input type="radio"/> |
|-------------------------------------------------------------------------|------------------------------------------------------------------------------|----------------------------------------------------------------------------------------------------------------------|--------------------------------------------------------------------------|---------------------------------------------------------------------|

## CONCLUSIONS

### Recommendation

In adult patients with OSA, the TF suggests using either MMO or CPAP (conditional recommendation, very low quality of evidence).

### Justification

In the presented RCT, the panel determined differential benefits between MMO and CPAP to be trivial. Moderate adverse effects were associated with MMO, which could also require additional orthodontic work. Initially, patients may prefer CPAP because it is less invasive than MMO, but some patients may find MMO an acceptable alternative if they value not using CPAP or have other rationale for facial surgery. Patients who value the potential for adverse events or potential esthetical concerns more, may find MMO less acceptable. For patients experiencing CPAP failure, MMO is an effective alternative. Altogether, balance of effects may favour CPAP, but younger people and patients with high AHI may be more prone to accept MMO. Availability and cost may be a problem for MMO.

### Subgroup considerations

The intervention is usually acceptable for clinicians and health insurers, but its acceptability may largely vary among patients. There are age limitations in some countries.

### Implementation considerations

A greater involvement of maxillo-facial surgeons in the management of obstructive sleep apnoea is advisable to improve the multidisciplinary approach to this disorder, increase number and quality of studies on surgical treatment, and augment availability of maxillo-facial surgery when it could be appropriate.

## Monitoring and evaluation

Short-term and long-term follow-ups are indicated to evaluate efficacy of treatment, side-effects and possible relapses.

## Research priorities

At present, evidence from RCT is extremely limited. More studies are needed. They should also address aspects that were not considered in the available RCT study, like changes in blood pressure and in objective sleep quality.

## PICO 5 APPENDICES

### PICO 5 Appendix 1

| Outcomes                                                                                                                                   | Anticipated absolute effects <sup>~</sup> (95% CI)         |                                                          | Relative effect (95% CI) | No of participants (studies) | Certainty of the evidence (GRADE) | Comments                                                                                                                                                                                                        |
|--------------------------------------------------------------------------------------------------------------------------------------------|------------------------------------------------------------|----------------------------------------------------------|--------------------------|------------------------------|-----------------------------------|-----------------------------------------------------------------------------------------------------------------------------------------------------------------------------------------------------------------|
|                                                                                                                                            | Risk with CPAP                                             | Risk with maxillo-mandibular osteotomy                   |                          |                              |                                   |                                                                                                                                                                                                                 |
| Apnoea-hypopnoea index (AHI) assessed with: polysomnography (at home)<br>Scale from: 0 (best) to higher (worst)<br>follow up: mean 1 years | The mean apnoea-hypopnoea index was <b>6.3</b> events/hour | mean <b>1.8 events/hour more</b> (3.3 fewer to 6.9 more) | -                        | 50 (1 RCT)                   | ⊕⊕○○<br>LOW <sup>a,b</sup>        | Change with MMO: decrease from 56.8 (SD 16.5) to 8.1 (SD 7.0); Change score: 48.7 events/hour- - - change with CPAP: decrease from 50.3 (SD 12.4) to 6.3 (SD 1.9); Change score: 44.0 events/hour- - - p = 0.21 |
| Sleepiness assessed with: Epworth Sleepiness Scale<br>Scale from: 0 (best) to 24 (worst)<br>follow up: mean 1 years                        | The mean sleepiness was <b>5.9</b> points                  | mean <b>1.8 points more</b> (1.5 more to 2.1 more)       | -                        | 50 (1 RCT)                   | ⊕⊕○○<br>LOW <sup>b,c</sup>        | Intervention arm: decrease from 11.6 (2.8) to 7.7 (1.3) - - - control arm: decrease from 11.2 (2.6) to 5.9 (1.6) - - - p = 0.20                                                                                 |
| Satisfaction assessed with: visual analogue scale in %<br>Scale from: 0 (worst) to 100 (best)<br>follow up: mean 1 years                   | The mean satisfaction was <b>90</b> %                      | mean <b>4 % higher</b> (0 to 0 )                         | -                        | 50 (1 RCT)                   | ⊕○○○<br>VERY LOW <sup>b,c</sup>   | "No statistically significant difference"                                                                                                                                                                       |

| Outcomes       | Anticipated absolute effects* (95% CI)                                                                                                                                                                                                                                                                                                                                                                                                                                                                |                                        | Relative effect (95% CI) | № of participants (studies) | Certainty of the evidence (GRADE) | Comments                                                                                                                                                      |
|----------------|-------------------------------------------------------------------------------------------------------------------------------------------------------------------------------------------------------------------------------------------------------------------------------------------------------------------------------------------------------------------------------------------------------------------------------------------------------------------------------------------------------|----------------------------------------|--------------------------|-----------------------------|-----------------------------------|---------------------------------------------------------------------------------------------------------------------------------------------------------------|
|                | Risk with CPAP                                                                                                                                                                                                                                                                                                                                                                                                                                                                                        | Risk with maxillo-mandibular osteotomy |                          |                             |                                   |                                                                                                                                                               |
| Adverse events | MMO arm: (1) acute episode of tracheotomy tube crusting with sudden dyspnoea; All patients had transient paresthesias in infraorbital and mandibular areas; (7) persistent but not disturbing paresthesia around the chin; (6) slight to minimal malocclusion; (1) minimal orthodontic correction was required - - - CPAP: (4) patients required more than 3 consultations to stabilize the full fruition of the ventilation device; (1) lesion to the facial skin (overcome with a new type of mask) |                                        | -                        | 50 (1 RCT)                  | ⊕○○○<br>VERY LOW <sup>b,c</sup>   | Complaints from patients: CPAP arm: almost all patients complained of minor discomfort, whereas 3 requested to stop the treatment& entered the surgical group |

- a. Downgraded two for imprecision: 95% CI suggest the possibility of both benefit and harm; only 50 participants included"From a methodological point of view, the true limit of this study is its low power. The power calculation suggests that a well-designed study would need to be extremely large and would almost certainly require multi-institutional collaboration for collecting larger surgical serie", baseline scores differ.
- b. Downgraded one for study limitations: 2 domains of high risk of bias due to unblinded study (blinding not possible). Home-based instead of clinical polysomnography not determined to introduce bias.
- c. Downgraded two for imprecision: only 50 participants included"From a methodological point of view, the true limit of this study is its low power. The power calculation suggests that a well-designed study would need to be extremely large and would almost certainly require multi-institutional collaboration for collecting larger surgical serie", baseline scores differ.

## PICO 5 Appendix 2

| Outcomes                                                                                                                                                                                                         | Importance | Certainty of the evidence (GRADE)                                                                              |
|------------------------------------------------------------------------------------------------------------------------------------------------------------------------------------------------------------------|------------|----------------------------------------------------------------------------------------------------------------|
| <p>Apnoea-hypopnoea index<br/>                     assessed with: polysomnography (at home)<br/>                     Scale from: 0 (best) to higher (worst)<br/>                     follow up: mean 1 years</p> | CRITICAL   | <br>VERY LOW <sup>a,b</sup> |
| <p>Sleepiness<br/>                     assessed with: Epworth Sleepiness Scale<br/>                     Scale from: 0 (best) to 24 (worst)<br/>                     follow up: mean 1 years</p>                  | CRITICAL   | <br>VERY LOW <sup>b,c</sup> |
| <p>Satisfaction<br/>                     assessed with: visual analogue scale in %<br/>                     Scale from: 0 (worst) to 100 (best)<br/>                     follow up: mean 1 years</p>             | CRITICAL   | <br>VERY LOW <sup>b,c</sup> |
| <p>Adverse events</p>                                                                                                                                                                                            | CRITICAL   | <br>VERY LOW <sup>b,c</sup> |

- a. Downgraded two for imprecision: 95% CI suggest the possibility of both benefit and harm; only 50 participants included"From a methodological point of view, the true limit of this study is its low power. The power calculation suggests that a well-designed study would need to be extremely large and would almost certainly require multi-institutional collaboration for collecting larger surgical serie", baseline scores differ.
- b. Downgraded one for study limitations: 2 domains of high risk of bias due to unblinded study (blinding not possible).
- c. Downgraded two for imprecision: only 50 participants included"From a methodological point of view, the true limit of this study is its low power. The power calculation suggests that a well-designed study would need to be extremely large and would almost certainly require multi-institutional collaboration for collecting larger surgical serie", baseline scores differ.

**Table e17: PICO 6**

**QUESTION**

| Should carbonic anhydrase inhibitors (compared to placebo) be used for adult patients with obstructive sleep apnoea? |                                                                                                                                                                                                                                |
|----------------------------------------------------------------------------------------------------------------------|--------------------------------------------------------------------------------------------------------------------------------------------------------------------------------------------------------------------------------|
| POPULATION:                                                                                                          | Adult patients with obstructive sleep apnoea.                                                                                                                                                                                  |
| INTERVENTION:                                                                                                        | Carbonic anhydrase inhibitors.                                                                                                                                                                                                 |
| COMPARISON:                                                                                                          | Placebo.                                                                                                                                                                                                                       |
| MAIN OUTCOMES:                                                                                                       | Apnoea-hypopnoea index (events/hour) (AHI); Sleep efficiency %; 4% oxygen desaturation index (events/hour) (ODI); Sleepiness ESS / Karolinska sleepiness scale; Arterial hypertension; Adherence / Compliance; Adverse events. |
| SETTING:                                                                                                             |                                                                                                                                                                                                                                |
| PERSPECTIVE:                                                                                                         |                                                                                                                                                                                                                                |
| BACKGROUND:                                                                                                          |                                                                                                                                                                                                                                |
| CONFLICT OF INTERESTS:                                                                                               |                                                                                                                                                                                                                                |

**ASSESSMENT**

| Problem                                                                                                                                                                                                                                                                                         |                                                                                                                                                                                                                                                                                                                                                                                                                                  |                                                                                                                                                                         |
|-------------------------------------------------------------------------------------------------------------------------------------------------------------------------------------------------------------------------------------------------------------------------------------------------|----------------------------------------------------------------------------------------------------------------------------------------------------------------------------------------------------------------------------------------------------------------------------------------------------------------------------------------------------------------------------------------------------------------------------------|-------------------------------------------------------------------------------------------------------------------------------------------------------------------------|
| Is the problem a priority?                                                                                                                                                                                                                                                                      |                                                                                                                                                                                                                                                                                                                                                                                                                                  |                                                                                                                                                                         |
| JUDGEMENT                                                                                                                                                                                                                                                                                       | RESEARCH EVIDENCE                                                                                                                                                                                                                                                                                                                                                                                                                | ADDITIONAL CONSIDERATIONS                                                                                                                                               |
| <ul style="list-style-type: none"> <li><input type="radio"/> No</li> <li><input type="radio"/> Probably no</li> <li><input type="radio"/> Probably yes</li> <li><input checked="" type="radio"/> Yes</li> <li><input type="radio"/> Varies</li> <li><input type="radio"/> Don't know</li> </ul> | <p>Due to a high prevalence of CPAP non-adherence there is also a high demand for pharmaceutical therapies. There is still a sparsity of data, especially from RCTs, on the efficacy of a pharmacological therapy in OSA. Several studies in the field deal with drugs with carbonic anhydrase inhibitory properties. The positioning for such therapies is unclear and a formal European recommendation is urgently needed.</p> | <p>In the determination of efficacy, it is of interest to not only focus on the AHI but also on other outcomes like oxygenation, comorbidities and quality of life.</p> |
| Desirable Effects                                                                                                                                                                                                                                                                               |                                                                                                                                                                                                                                                                                                                                                                                                                                  |                                                                                                                                                                         |

| How substantial are the desirable anticipated effects?                                                                                                    |                              |                                                                                                                                                                                                                                                                                                                                                                                                                                      |
|-----------------------------------------------------------------------------------------------------------------------------------------------------------|------------------------------|--------------------------------------------------------------------------------------------------------------------------------------------------------------------------------------------------------------------------------------------------------------------------------------------------------------------------------------------------------------------------------------------------------------------------------------|
| JUDGEMENT                                                                                                                                                 | RESEARCH EVIDENCE            | ADDITIONAL CONSIDERATIONS                                                                                                                                                                                                                                                                                                                                                                                                            |
| <ul style="list-style-type: none"> <li>○ Trivial</li> <li>● Small</li> <li>○ Moderate</li> <li>○ Large</li> <li>○ Varies</li> <li>○ Don't know</li> </ul> | <p><i>See Appendix 1</i></p> | <p>Efficacy may be expressed in terms of reduced sleepiness, improved cognition, reduced blood pressure, potential primary preventive effects or improvement of metabolic disease. The majority of these outcomes have not been explored after carbonic anhydrase inhibitors in OSA. Phase II data suggest approximately 50% AHI reduction in half the population although patients may exhibit both smaller and bigger effects.</p> |
| <h2>Undesirable Effects</h2> <p>How substantial are the undesirable anticipated effects?</p>                                                              |                              |                                                                                                                                                                                                                                                                                                                                                                                                                                      |
| JUDGEMENT                                                                                                                                                 | RESEARCH EVIDENCE            | ADDITIONAL CONSIDERATIONS                                                                                                                                                                                                                                                                                                                                                                                                            |
| <ul style="list-style-type: none"> <li>○ Large</li> <li>○ Moderate</li> <li>● Small</li> <li>○ Trivial</li> <li>○ Varies</li> <li>○ Don't know</li> </ul> | <p><i>See Appendix 1</i></p> | <p>The clinical effect needs to be assessed with respect to dose dependency and duration.</p> <p>Effects: dose-dependent</p> <p>Could result in polypharmacy in patients with co-morbidities (no data)</p> <p>Undesirable effects can be more important in patients with severe obstructive sleep apnoea and hypoxia</p> <p>Discussion: small to moderate</p>                                                                        |
| <h2>Certainty of evidence</h2> <p>What is the overall certainty of the evidence of effects?</p>                                                           |                              |                                                                                                                                                                                                                                                                                                                                                                                                                                      |
| JUDGEMENT                                                                                                                                                 | RESEARCH EVIDENCE            | ADDITIONAL CONSIDERATIONS                                                                                                                                                                                                                                                                                                                                                                                                            |



|                                                                                                                                                |                              |                                                                                                                                                                                                                                                                                            |
|------------------------------------------------------------------------------------------------------------------------------------------------|------------------------------|--------------------------------------------------------------------------------------------------------------------------------------------------------------------------------------------------------------------------------------------------------------------------------------------|
| <ul style="list-style-type: none"> <li>○ Very low</li> <li>● Low</li> <li>○ Moderate</li> <li>○ High</li> <li>○ No included studies</li> </ul> | <p><i>See Appendix 2</i></p> | <p>Only few studies available but the bulk of data suggests a substantial but variable effect. Several candidate drugs are under investigation. No drug with a label including OSA has yet undergone regulatory evaluation (except medications aimed to reduce overweight or obesity).</p> |
|------------------------------------------------------------------------------------------------------------------------------------------------|------------------------------|--------------------------------------------------------------------------------------------------------------------------------------------------------------------------------------------------------------------------------------------------------------------------------------------|

## Values

Is there important uncertainty about or variability in how much people value the main outcomes?

| JUDGEMENT                                                                                                                                                                                                                                                        | RESEARCH EVIDENCE                                                                                                  | ADDITIONAL CONSIDERATIONS                                                                                                                                                                                                                                                                                                                                                                                                         |
|------------------------------------------------------------------------------------------------------------------------------------------------------------------------------------------------------------------------------------------------------------------|--------------------------------------------------------------------------------------------------------------------|-----------------------------------------------------------------------------------------------------------------------------------------------------------------------------------------------------------------------------------------------------------------------------------------------------------------------------------------------------------------------------------------------------------------------------------|
| <ul style="list-style-type: none"> <li>○ Important uncertainty or variability</li> <li>○ Possibly important uncertainty or variability</li> <li>● Probably no important uncertainty or variability</li> <li>○ No important uncertainty or variability</li> </ul> | <p>Only very limited data available. Tolerability important for compliance. Probably no important variability.</p> | <p>Drug therapies may be considered in various combination strategies.</p> <p>It is likely that the efficacy of various types of medication (pharmacological therapies in OSA) will vary with respect to phenotype. Tools to predict the best therapeutic alternative in a given patient, potentially based on biomarkers, need to be developed. This need might be higher after various drugs compared with eg. CPAP in OSA.</p> |

## Balance of effects

Does the balance between desirable and undesirable effects favor the intervention or the comparison?

| JUDGEMENT                                                                                                                                                                                                                                                                                                      | RESEARCH EVIDENCE                                        | ADDITIONAL CONSIDERATIONS                                                                   |
|----------------------------------------------------------------------------------------------------------------------------------------------------------------------------------------------------------------------------------------------------------------------------------------------------------------|----------------------------------------------------------|---------------------------------------------------------------------------------------------|
| <ul style="list-style-type: none"> <li>○ Favors the comparison</li> <li>○ Probably favors the comparison</li> <li>○ Does not favor either the intervention or the comparison</li> <li>● Probably favors the intervention</li> <li>○ Favors the intervention</li> <li>○ Varies</li> <li>○ Don't know</li> </ul> | <p>Very limited data available. Favors intervention.</p> | <p>Small studies only and RCTs needed. High variability in terms of tolerance expected.</p> |

## Resources required

How large are the resource requirements (costs)?

| JUDGEMENT                                                                                                                                                                                                                      | RESEARCH EVIDENCE                                | ADDITIONAL CONSIDERATIONS                                                                                                                                                                           |
|--------------------------------------------------------------------------------------------------------------------------------------------------------------------------------------------------------------------------------|--------------------------------------------------|-----------------------------------------------------------------------------------------------------------------------------------------------------------------------------------------------------|
| <ul style="list-style-type: none"> <li>○ Large costs</li> <li>○ Moderate costs</li> <li>○ Negligible costs and savings</li> <li>○ Moderate savings</li> <li>○ Large savings</li> <li>● Varies</li> <li>○ Don't know</li> </ul> | <p>We did not look for studies on resources.</p> | <p>There are huge differences between health care systems throughout Europe. There are unique reimbursement strategies. Therefore, no general statements on socioeconomic aspects can be given.</p> |

## Certainty of evidence of required resources

What is the certainty of the evidence of resource requirements (costs)?

| JUDGEMENT                                                                                                                                      | RESEARCH EVIDENCE                                | ADDITIONAL CONSIDERATIONS                                                                                                                                                                           |
|------------------------------------------------------------------------------------------------------------------------------------------------|--------------------------------------------------|-----------------------------------------------------------------------------------------------------------------------------------------------------------------------------------------------------|
| <ul style="list-style-type: none"> <li>● Very low</li> <li>○ Low</li> <li>○ Moderate</li> <li>○ High</li> <li>○ No included studies</li> </ul> | <p>We did not look for studies on resources.</p> | <p>There are huge differences between health care systems throughout Europe. There are unique reimbursement strategies. Therefore, no general statements on socioeconomic aspects can be given.</p> |

## Cost effectiveness

Does the cost-effectiveness of the intervention favor the intervention or the comparison?

| JUDGEMENT                                                                                                                                                                                                                                                                                                               | RESEARCH EVIDENCE                                        | ADDITIONAL CONSIDERATIONS                                                                                                                                                                           |
|-------------------------------------------------------------------------------------------------------------------------------------------------------------------------------------------------------------------------------------------------------------------------------------------------------------------------|----------------------------------------------------------|-----------------------------------------------------------------------------------------------------------------------------------------------------------------------------------------------------|
| <ul style="list-style-type: none"> <li>○ Favors the comparison</li> <li>○ Probably favors the comparison</li> <li>○ Does not favor either the intervention or the comparison</li> <li>○ Probably favors the intervention</li> <li>○ Favors the intervention</li> <li>● Varies</li> <li>○ No included studies</li> </ul> | <p>We did not look for studies on cost-effectiveness</p> | <p>There are huge differences between health care systems throughout Europe. There are unique reimbursement strategies. Therefore, no general statements on socioeconomic aspects can be given.</p> |

## Equity

What would be the impact on health equity?

| JUDGEMENT                                                                                                                                                                                                                                                                                                                                                               | RESEARCH EVIDENCE                             | ADDITIONAL CONSIDERATIONS                                                         |
|-------------------------------------------------------------------------------------------------------------------------------------------------------------------------------------------------------------------------------------------------------------------------------------------------------------------------------------------------------------------------|-----------------------------------------------|-----------------------------------------------------------------------------------|
| <ul style="list-style-type: none"> <li><input type="radio"/> Reduced</li> <li><input checked="" type="radio"/> Probably reduced</li> <li><input type="radio"/> Probably no impact</li> <li><input type="radio"/> Probably increased</li> <li><input type="radio"/> Increased</li> <li><input type="radio"/> Varies</li> <li><input type="radio"/> Don't know</li> </ul> | We did not look for studies on health equity. | All drugs should be available, but off-label, patients might have to cover costs. |

## Acceptability

Is the intervention acceptable to key stakeholders?

| JUDGEMENT                                                                                                                                                                                                                                                                                       | RESEARCH EVIDENCE                                    | ADDITIONAL CONSIDERATIONS                                                                                            |
|-------------------------------------------------------------------------------------------------------------------------------------------------------------------------------------------------------------------------------------------------------------------------------------------------|------------------------------------------------------|----------------------------------------------------------------------------------------------------------------------|
| <ul style="list-style-type: none"> <li><input type="radio"/> No</li> <li><input type="radio"/> Probably no</li> <li><input checked="" type="radio"/> Probably yes</li> <li><input type="radio"/> Yes</li> <li><input type="radio"/> Varies</li> <li><input type="radio"/> Don't know</li> </ul> | We did not look for studies assessing acceptability. | <p>Limitation: physicians might not be aware of this possibility.</p> <p>Patients might prefer compared to CPAP.</p> |

## Feasibility

Is the intervention feasible to implement?

| JUDGEMENT                                                                                                                                                                                                                                                                                       | RESEARCH EVIDENCE                                  | ADDITIONAL CONSIDERATIONS                                                                                              |
|-------------------------------------------------------------------------------------------------------------------------------------------------------------------------------------------------------------------------------------------------------------------------------------------------|----------------------------------------------------|------------------------------------------------------------------------------------------------------------------------|
| <ul style="list-style-type: none"> <li><input type="radio"/> No</li> <li><input checked="" type="radio"/> Probably no</li> <li><input type="radio"/> Probably yes</li> <li><input type="radio"/> Yes</li> <li><input type="radio"/> Varies</li> <li><input type="radio"/> Don't know</li> </ul> | We did not look for studies assessing feasibility. | <p>Off label use.</p> <p>As the certainty of the evidence is low, physicians might have some concerns to prescribe</p> |

## SUMMARY OF JUDGEMENTS

|                                             | JUDGEMENT                            |                                               |                                                          |                                         |                         |               |                     |
|---------------------------------------------|--------------------------------------|-----------------------------------------------|----------------------------------------------------------|-----------------------------------------|-------------------------|---------------|---------------------|
| PROBLEM                                     | No                                   | Probably no                                   | Probably yes                                             | <b>Yes</b>                              |                         | Varies        | Don't know          |
| DESIRABLE EFFECTS                           | Trivial                              | <b>Small</b>                                  | Moderate                                                 | Large                                   |                         | Varies        | Don't know          |
| UNDESIRABLE EFFECTS                         | Large                                | Moderate                                      | <b>Small</b>                                             | Trivial                                 |                         | Varies        | Don't know          |
| CERTAINTY OF EVIDENCE                       | Very low                             | <b>Low</b>                                    | Moderate                                                 | High                                    |                         |               | No included studies |
| VALUES                                      | Important uncertainty or variability | Possibly important uncertainty or variability | <b>Probably no important uncertainty or variability</b>  | No important uncertainty or variability |                         |               |                     |
| BALANCE OF EFFECTS                          | Favors the comparison                | Probably favors the comparison                | Does not favor either the intervention or the comparison | <b>Probably favors the intervention</b> | Favors the intervention | Varies        | Don't know          |
| RESOURCES REQUIRED                          | Large costs                          | Moderate costs                                | Negligible costs and savings                             | Moderate savings                        | Large savings           | <b>Varies</b> | Don't know          |
| CERTAINTY OF EVIDENCE OF REQUIRED RESOURCES | <b>Very low</b>                      | Low                                           | Moderate                                                 | High                                    |                         |               | No included studies |
| COST EFFECTIVENESS                          | Favors the comparison                | Probably favors the comparison                | Does not favor either the intervention or the comparison | Probably favors the intervention        | Favors the intervention | <b>Varies</b> | No included studies |
| EQUITY                                      | Reduced                              | <b>Probably reduced</b>                       | Probably no impact                                       | Probably increased                      | Increased               | Varies        | Don't know          |
| ACCEPTABILITY                               | No                                   | Probably no                                   | <b>Probably yes</b>                                      | Yes                                     |                         | Varies        | Don't know          |
| FEASIBILITY                                 | No                                   | <b>Probably no</b>                            | Probably yes                                             | Yes                                     |                         | Varies        | Don't know          |

## TYPE OF RECOMMENDATION

|                                                |                                                     |                                                                          |                                                        |                                            |
|------------------------------------------------|-----------------------------------------------------|--------------------------------------------------------------------------|--------------------------------------------------------|--------------------------------------------|
| Strong recommendation against the intervention | Conditional recommendation against the intervention | Conditional recommendation for either the intervention or the comparison | <b>Conditional recommendation for the intervention</b> | Strong recommendation for the intervention |
|------------------------------------------------|-----------------------------------------------------|--------------------------------------------------------------------------|--------------------------------------------------------|--------------------------------------------|

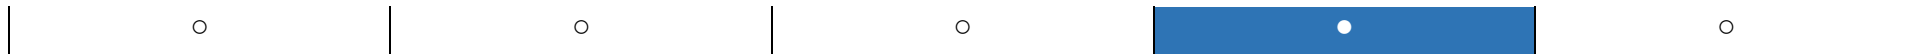

## CONCLUSIONS

### Recommendation

We suggest the use of carbonic anhydrase inhibitors only in the context of an RCT, as there is no drug in this category with an approved label for OSA (conditional recommendation, low quality of evidence).

### Justification

The acute effects of carbonic anhydrase inhibitors in OSA are reasonably well documented and there is biological plausibility, although the amount of evidence is limited. The effect on bordering comorbid conditions is incompletely studied and there is concern regarding long-term outcome due to missing data. The only drug in this class with more extensive documentation is acetazolamide, but there is no approved label on this drug for use in OSA. Side effects seem to be class specific for drugs with carbonic anhydrase inhibitory effect and proper mapping of safety should be performed over longer-term therapy. Excessive daytime sleepiness has not been shown to decrease after therapy. Cognitive symptoms are not uncommon for drugs with a carbonic anhydrase inhibitory effect including topiramate and zonisamide. In addition, it remains that variability in the response to drug could be introduced by age, occupation, severity of the underlying condition and comorbidities. Putting these aspects together, the panel decided to make a recommendation for use under research conditions.

### Subgroup considerations

Drug therapy is familiar, acceptable for clinicians, and frequently preferred by patients. There is no prior art on the regulatory concerns that may be applied on the approval of a drug to be used in OSA, particularly with respect to relevant outcomes, efficacy and side effects. In addition, the endpoints that would justify a willingness to pay for this type of therapy in OSA are still uncertain.

### Implementation considerations

Cost is not a limiting factor, given acetazolamide is a cheap drug out of patent, and available in most European countries. Side effects are usually minor and dose-dependent (paresthesias, nocturia), but the drug should preferably not be prescribed in patients with nephrocalcinosis. Newer carbo-anhydrase inhibitors should be used more carefully, given wide-spread use is lacking.

### Monitoring and evaluation

Regular follow-up with evaluation of subjective improvement, symptoms, side effects, and eventually electrolyte balance. Polysomnographic reassessment is useful on the short-run and long-run, given effectiveness is only present in 50% of the cases, and long-term data are lacking.

## Research priorities

Large RCTs as part in conventional drug development programs in various forms of OSA are warranted. Biomarkers useful for identification of candidates for drug therapy should be developed. The possibility to combine drug therapy with various forms of mechanical therapy in OSA should be explored. Finally, a better understanding of the effects of carbonic anhydrase inhibitors in comorbidities typical in OSA, such cardiovascular and metabolic disorders and obesity, would be useful when exploring this field of therapy in OSA. The potential influence of drugs with a carbonic anhydrase inhibitory effect suggests that comorbidities in OSA, such as insulin resistance and diabetes, dyslipidemia, systemic hypertension and cardiovascular disease, should be specifically addressed in trials as there is experimental data suggesting that their appearance in patients with OSA may be influenced to the pathomechanism.

## APPENDICES PICO 6

### PICO 6 Appendix 1

| Outcomes                                                                                                                                                                                                                                               | Impact                                                                                                                                                                                                                                                                                                                                                                                                                                                                                                                                                               | No of participants (studies) | Certainty of the evidence (GRADE) |
|--------------------------------------------------------------------------------------------------------------------------------------------------------------------------------------------------------------------------------------------------------|----------------------------------------------------------------------------------------------------------------------------------------------------------------------------------------------------------------------------------------------------------------------------------------------------------------------------------------------------------------------------------------------------------------------------------------------------------------------------------------------------------------------------------------------------------------------|------------------------------|-----------------------------------|
| Apnoea-hypopnoea index (events/hour) (AHI) assessed with: PSG; Scale from 0 (best) to higher (worst); range of follow-up: 6 days to 28 weeks of intervention                                                                                           | Meta-analysis of 3 studies (78 patients) shows a statistically significant effect favouring carbonic anhydrase inhibitors over placebo treatment (mean difference -14.92 95% CI [-22.44, -7.40]; range of follow-up: 2 - 28 weeks). Two further studies tested carbonic anhydrase inhibitors in two different altitudes and reported results as median (2x3 days of treatment). They showed statistically significant results at both altitudes in one study. In the other study, only the results at the higher altitude showed a statistically significant result. | (5 RCTs)                     | ⊕⊕○○<br>LOW <sup>a,b</sup>        |
| Sleep efficiency % assessed with: PSG; Scale from 0 (worst) to 100% (best); 6 days to 4 weeks of intervention                                                                                                                                          | 3 studies reported sleep efficiency of which two showed statistically significant results favouring the intervention (both at both measured altitudes, only median reported) and one did not.                                                                                                                                                                                                                                                                                                                                                                        | (3 RCTs)                     | ⊕⊕○○<br>LOW <sup>a,b</sup>        |
| 4% oxygen desaturation index (events/hour) (ODI) assessed with: PSG, range of follow-up: 6 days to 4 weeks of intervention                                                                                                                             | Meta-analysis of 2 studies (38 patients) showed a statistically significant effect favouring carbonic anhydrase inhibitors (mean difference -9.43 95% CI [-16.40, -2.47]). One other study reported ODI <3% and also showed a statistically significant effect favouring the intervention.                                                                                                                                                                                                                                                                           | (3 RCTs)                     | ⊕⊕○○<br>LOW <sup>a,b,c</sup>      |
| Sleepiness ESS / Karolinska sleepiness scale assessed with: Epworth Sleepiness Scale from 1 (best) to 24 (worst) and Karolinska sleepiness scale ranging from 1 (very awake) to 9 (very tired); range of follow-up: 6 days to 28 weeks of intervention | Neither the meta-analysis of 2 studies analysing sleepiness via ESS (mean difference 0.78 95% CI [-1.01, 2.56]) nor the results of two additional studies using the Karolinska sleepiness scale found statistically significant results.                                                                                                                                                                                                                                                                                                                             | (4 RCTs)                     | ⊕⊕○○<br>LOW <sup>a,b</sup>        |
| Arterial hypertension assessed with: PSG; systolic above 140mmHG and diastolic above 90mmHG; range of follow-up: 6 days to 28 weeks of intervention                                                                                                    | Meta-analysis of 2 studies (68 patients) studies showed no statistically significant effect regarding systolic and diastolic blood pressure (mean difference -4.63 95% CI [-9.84, 0.59] and mean difference 1.28 95% CI [-2.23, 4.78] respectively). One other study showed a statistically significant effect looking at the mean blood pressure favouring the intervention at both altitudes. One other study showed a statistically significant effect looking at systolic, but not diastolic blood pressure at both altitudes.                                   | (4 RCTs)                     | ⊕⊕○○<br>LOW <sup>a,b</sup>        |

| Outcomes               | Impact                                                                                                                                                                                                                                                                                                           | No of participants (studies) | Certainty of the evidence (GRADE) |
|------------------------|------------------------------------------------------------------------------------------------------------------------------------------------------------------------------------------------------------------------------------------------------------------------------------------------------------------|------------------------------|-----------------------------------|
| Adherence / Compliance | In one study (N=10) patients were asked for preferences: "Seven subjects expressed no preference and three subjects preferred acetazolamide( (intervention)". In another study (N=28), compliance was determined by tablet count at 4 weeks: 90.1 ± 6.9% in intervention group and 90.6 ± 8.3% in control group. | (2 RCTs)                     | ⊕⊕○○<br>LOW <sup>d</sup>          |
| Adverse events         | Adverse events were not reported homogeneous enough to calculate meta-analysis (see supplementary materials). Most reported AEs were paraesthesia, unpleasant taste, vertigo and dry mouth and they occurred more often in the intervention group.                                                               | (5 RCTs)                     | ⊕⊕○○<br>LOW <sup>a,b</sup>        |

- a. Minus 1 for indirectness, due to the fact that 1-2 studies were conducted in altitude, which is very specific and not specifically covered by the PICO definition.
- b. Minus 1 for imprecision due to the limited number of patients.
- c. Minus 1 for inconsistency would be reasonable since the results of the studies differ, however, since for the study in altitude certainty in the evidence was already downgraded 1 for indirectness it was not downgraded for inconsistency as well.
- d. Minus 2 for imprecision due to the very limited number of patients.



## PICO 6 Appendix 2

| Outcomes                                                                                                                                                                                                                                                  | Importance | Certainty of the evidence (GRADE) |
|-----------------------------------------------------------------------------------------------------------------------------------------------------------------------------------------------------------------------------------------------------------|------------|-----------------------------------|
| Apnoea-hypopnoea index (events/hour) (AHI)<br>assessed with: PSG; Scale from 0 (best) to higher (worst); range of follow-up: 6 days to 28 weeks of intervention                                                                                           | CRITICAL   | ⊕⊕○○<br>LOW <sup>a,b</sup>        |
| Sleep efficiency %<br>assessed with: PSG; Scale from 0 (worst) to 100% (best); 6 days to 4 weeks of intervention                                                                                                                                          | CRITICAL   | ⊕⊕○○<br>LOW <sup>a,b</sup>        |
| 4% oxygen desaturation index (events/hour) (ODI)<br>assessed with: PSG, range of follow-up: 6 days to 4 weeks of intervention                                                                                                                             | CRITICAL   | ⊕⊕○○<br>LOW <sup>a,b,c</sup>      |
| Sleepiness ESS / Karolinska sleepiness scale<br>assessed with: Epworth Sleepiness Scale from 1 (best) to 24 (worst) and Karolinska sleepiness scale ranging from 1 (very awake) to 9 (very tired); range of follow-up: 6 days to 28 weeks of intervention | CRITICAL   | ⊕⊕○○<br>LOW <sup>a,b</sup>        |
| Arterial hypertension<br>assessed with: PSG; systolic above 140mmHg and diastolic above 90mmHg; range of follow-up: 6 days to 28 weeks of intervention                                                                                                    | CRITICAL   | ⊕⊕○○<br>LOW <sup>a,b</sup>        |
| Adherence / Compliance                                                                                                                                                                                                                                    | CRITICAL   | ⊕⊕○○<br>LOW <sup>d</sup>          |
| Adverse events                                                                                                                                                                                                                                            | CRITICAL   | ⊕⊕○○<br>LOW <sup>a,b</sup>        |

- a. Minus 1 for indirectness, due to the fact that 1-2 studies were conducted in altitude, which is very specific and not specifically covered by the PICO definition.
- b. Minus 1 for imprecision due to the limited number of patients.
- c. Minus 1 for inconsistency would be reasonable since the results of the studies differ, however, since for the study in altitude certainty in the evidence was already downgraded 1 for indirectness it was not downgraded for inconsistency as well.
- d. Minus 2 for imprecision due to the very limited number of patients.

**Table e18: PICO 7**

## QUESTION

| Should positional therapy or CPAP be used for adult patients with position-dependent obstructive sleep apnoea? |                                                                                                                                                                 |
|----------------------------------------------------------------------------------------------------------------|-----------------------------------------------------------------------------------------------------------------------------------------------------------------|
| POPULATION:                                                                                                    | Adult patients with position-dependent obstructive sleep apnoea.                                                                                                |
| INTERVENTION:                                                                                                  | Positional therapy (prevent supine).                                                                                                                            |
| COMPARISON:                                                                                                    | CPAP.                                                                                                                                                           |
| MAIN OUTCOMES:                                                                                                 | Apnoea-hypopnoea index; Sleep efficiency; Sleepiness; Health-related quality of life; Energy level scores; Compliance time (h/night); Adverse events (overall). |
| SETTING:                                                                                                       |                                                                                                                                                                 |
| PERSPECTIVE:                                                                                                   |                                                                                                                                                                 |
| BACKGROUND:                                                                                                    |                                                                                                                                                                 |
| CONFLICT OF INTERESTS:                                                                                         |                                                                                                                                                                 |

## ASSESSMENT

| Problem                                                                                                                                                                                                                                                                                         |                                                                                                                                                                                                                                                               |                                                                                                                                                     |
|-------------------------------------------------------------------------------------------------------------------------------------------------------------------------------------------------------------------------------------------------------------------------------------------------|---------------------------------------------------------------------------------------------------------------------------------------------------------------------------------------------------------------------------------------------------------------|-----------------------------------------------------------------------------------------------------------------------------------------------------|
| Is the problem a priority?                                                                                                                                                                                                                                                                      |                                                                                                                                                                                                                                                               |                                                                                                                                                     |
| JUDGEMENT                                                                                                                                                                                                                                                                                       | RESEARCH EVIDENCE                                                                                                                                                                                                                                             | ADDITIONAL CONSIDERATIONS                                                                                                                           |
| <ul style="list-style-type: none"> <li><input type="radio"/> No</li> <li><input type="radio"/> Probably no</li> <li><input type="radio"/> Probably yes</li> <li><input checked="" type="radio"/> Yes</li> <li><input type="radio"/> Varies</li> <li><input type="radio"/> Don't know</li> </ul> | <p>In case of supine-related obstructive sleep apnoea (positional OSA), positional therapy to prevent the supine position is discussed to be an effective first or second line therapy. Therefore, a formal European recommendation is urgently required.</p> | <p>It is of interest not only to focus on AHI, but also on other outcome parameters, including quality of life, comorbidities, and oxygenation.</p> |
| Desirable Effects                                                                                                                                                                                                                                                                               |                                                                                                                                                                                                                                                               |                                                                                                                                                     |
| How substantial are the desirable anticipated effects?                                                                                                                                                                                                                                          |                                                                                                                                                                                                                                                               |                                                                                                                                                     |

| JUDGEMENT                                                                                                                                                 | RESEARCH EVIDENCE | ADDITIONAL CONSIDERATIONS                                                                                                                                                                                                                                                      |
|-----------------------------------------------------------------------------------------------------------------------------------------------------------|-------------------|--------------------------------------------------------------------------------------------------------------------------------------------------------------------------------------------------------------------------------------------------------------------------------|
| <ul style="list-style-type: none"> <li>○ Trivial</li> <li>● Small</li> <li>○ Moderate</li> <li>○ Large</li> <li>○ Varies</li> <li>○ Don't know</li> </ul> | See Appendix 1.   | CPAP was slightly more effective than positional therapy, but compliance was lower. The mean sleep efficiency did not significantly differ between therapy modalities. Sleepiness as measured by ESS showed no clinically relevant difference and HRQoL was also very similar. |

## Undesirable Effects

How substantial are the undesirable anticipated effects?

| JUDGEMENT                                                                                                                                                 | RESEARCH EVIDENCE | ADDITIONAL CONSIDERATIONS                                                                                                                                                                                                                                                          |
|-----------------------------------------------------------------------------------------------------------------------------------------------------------|-------------------|------------------------------------------------------------------------------------------------------------------------------------------------------------------------------------------------------------------------------------------------------------------------------------|
| <ul style="list-style-type: none"> <li>○ Large</li> <li>○ Moderate</li> <li>● Small</li> <li>○ Trivial</li> <li>○ Varies</li> <li>○ Don't know</li> </ul> | See Appendix 1.   | Side effects were rare and mild with both therapy options, but two out of three studies found significantly less side effects with positional therapy. They comprise skin irritation (CPAP and positional therapy), xerostomia (CPAP) and shoulder/neck pain (positional therapy). |

## Certainty of evidence

What is the overall certainty of the evidence of effects?

| JUDGEMENT                                                                                                                                      | RESEARCH EVIDENCE | ADDITIONAL CONSIDERATIONS                                                                                                                                  |
|------------------------------------------------------------------------------------------------------------------------------------------------|-------------------|------------------------------------------------------------------------------------------------------------------------------------------------------------|
| <ul style="list-style-type: none"> <li>● Very low</li> <li>○ Low</li> <li>○ Moderate</li> <li>○ High</li> <li>○ No included studies</li> </ul> | See Appendix 2.   | There is a lack of long-term RCTs with higher number of patients, including different levels of OSA severity, various comorbidities and weight categories. |

## Values

Is there important uncertainty about or variability in how much people value the main outcomes?

| JUDGEMENT                                                                                                                                                                                                     | RESEARCH EVIDENCE | ADDITIONAL CONSIDERATIONS                                                                                                                                                                                               |
|---------------------------------------------------------------------------------------------------------------------------------------------------------------------------------------------------------------|-------------------|-------------------------------------------------------------------------------------------------------------------------------------------------------------------------------------------------------------------------|
| <ul style="list-style-type: none"> <li>○ Important uncertainty or variability</li> <li>● Possibly important uncertainty or variability</li> <li>○ Probably no important uncertainty or variability</li> </ul> |                   | There is probably a high degree of agreement regarding the value of the above outcome parameters for assessing treatment efficacy. There are differences in the recognition and acceptance of the various side effects. |

|                                                                                                                                                                                                                                                                                                                |                                                                                                                                                                                                                                |                                                                                                                                                                                                             |
|----------------------------------------------------------------------------------------------------------------------------------------------------------------------------------------------------------------------------------------------------------------------------------------------------------------|--------------------------------------------------------------------------------------------------------------------------------------------------------------------------------------------------------------------------------|-------------------------------------------------------------------------------------------------------------------------------------------------------------------------------------------------------------|
| <ul style="list-style-type: none"> <li>○ No important uncertainty or variability</li> </ul>                                                                                                                                                                                                                    |                                                                                                                                                                                                                                |                                                                                                                                                                                                             |
| <b>Balance of effects</b><br>Does the balance between desirable and undesirable effects favor the intervention or the comparison?                                                                                                                                                                              |                                                                                                                                                                                                                                |                                                                                                                                                                                                             |
| <b>JUDGEMENT</b>                                                                                                                                                                                                                                                                                               | <b>RESEARCH EVIDENCE</b>                                                                                                                                                                                                       | <b>ADDITIONAL CONSIDERATIONS</b>                                                                                                                                                                            |
| <ul style="list-style-type: none"> <li>○ Favors the comparison</li> <li>○ Probably favors the comparison</li> <li>● Does not favor either the intervention or the comparison</li> <li>○ Probably favors the intervention</li> <li>○ Favors the intervention</li> <li>○ Varies</li> <li>○ Don't know</li> </ul> | <p>With clear definition of the population to treat, there is no substantial difference in therapy outcome, considering somewhat less treatment efficacy in positional therapy, while therapy compliance is lower in CPAP.</p> | <p>Therapy preferences might differ between individuals. A general favorisation of one or the other treatment modality can not be expressed, considering the comparable effect on sleepiness and HRQoL.</p> |
| <b>Resources required</b><br>How large are the resource requirements (costs)?                                                                                                                                                                                                                                  |                                                                                                                                                                                                                                |                                                                                                                                                                                                             |
| <b>JUDGEMENT</b>                                                                                                                                                                                                                                                                                               | <b>RESEARCH EVIDENCE</b>                                                                                                                                                                                                       | <b>ADDITIONAL CONSIDERATIONS</b>                                                                                                                                                                            |
| <ul style="list-style-type: none"> <li>○ Large costs</li> <li>○ Moderate costs</li> <li>○ Negligible costs and savings</li> <li>○ Moderate savings</li> <li>○ Large savings</li> <li>● Varies</li> <li>○ Don't know</li> </ul>                                                                                 | <p>We did not look for studies on resources.</p>                                                                                                                                                                               | <p>There are huge differences between health care systems throughout Europe. There are unique reimbursement strategies. Therefore, no general statements on socioeconomic aspects can be given.</p>         |
| <b>Certainty of evidence of required resources</b><br>What is the certainty of the evidence of resource requirements (costs)?                                                                                                                                                                                  |                                                                                                                                                                                                                                |                                                                                                                                                                                                             |
| <b>JUDGEMENT</b>                                                                                                                                                                                                                                                                                               | <b>RESEARCH EVIDENCE</b>                                                                                                                                                                                                       | <b>ADDITIONAL CONSIDERATIONS</b>                                                                                                                                                                            |
| <ul style="list-style-type: none"> <li>○ Very low</li> <li>○ Low</li> <li>○ Moderate</li> <li>○ High</li> <li>● No included studies</li> </ul>                                                                                                                                                                 | <p>We did not look for studies on resources.</p>                                                                                                                                                                               | <p>There are huge differences between health care systems throughout Europe. There are unique reimbursement strategies. Therefore, no general statements on socioeconomic aspects can be given.</p>         |

## Cost effectiveness

Does the cost-effectiveness of the intervention favor the intervention or the comparison?

| JUDGEMENT                                                                                                                                                                                                                                                                                                                                                                                                                                                              | RESEARCH EVIDENCE                                  | ADDITIONAL CONSIDERATIONS                                                                                                                                                                    |
|------------------------------------------------------------------------------------------------------------------------------------------------------------------------------------------------------------------------------------------------------------------------------------------------------------------------------------------------------------------------------------------------------------------------------------------------------------------------|----------------------------------------------------|----------------------------------------------------------------------------------------------------------------------------------------------------------------------------------------------|
| <ul style="list-style-type: none"><li><input type="radio"/> Favors the comparison</li><li><input type="radio"/> Probably favors the comparison</li><li><input type="radio"/> Does not favor either the intervention or the comparison</li><li><input type="radio"/> Probably favors the intervention</li><li><input type="radio"/> Favors the intervention</li><li><input type="radio"/> Varies</li><li><input checked="" type="radio"/> No included studies</li></ul> | We did not look for studies on cost-effectiveness. | There are huge differences between health care systems throughout Europe. There are unique reimbursement strategies. Therefore, no general statements on socioeconomic aspects can be given. |

## Equity

What would be the impact on health equity?

| JUDGEMENT                                                                                                                                                                                                                                                                                                                                                       | RESEARCH EVIDENCE                            | ADDITIONAL CONSIDERATIONS                                                                                                                                                                                                                                   |
|-----------------------------------------------------------------------------------------------------------------------------------------------------------------------------------------------------------------------------------------------------------------------------------------------------------------------------------------------------------------|----------------------------------------------|-------------------------------------------------------------------------------------------------------------------------------------------------------------------------------------------------------------------------------------------------------------|
| <ul style="list-style-type: none"><li><input type="radio"/> Reduced</li><li><input type="radio"/> Probably reduced</li><li><input checked="" type="radio"/> Probably no impact</li><li><input type="radio"/> Probably increased</li><li><input type="radio"/> Increased</li><li><input type="radio"/> Varies</li><li><input type="radio"/> Don't know</li></ul> | We did not look for studies on health equity | The availability of positional therapy might differ between countries due to different healthcare systems. However, given the fact that no elaborate training is required to implement positional therapy, availability seems only limited by device costs. |

## Acceptability

Is the intervention acceptable to key stakeholders?

| JUDGEMENT                                                                                                                                                                                                                                                                                | RESEARCH EVIDENCE                                   | ADDITIONAL CONSIDERATIONS                                                            |
|------------------------------------------------------------------------------------------------------------------------------------------------------------------------------------------------------------------------------------------------------------------------------------------|-----------------------------------------------------|--------------------------------------------------------------------------------------|
| <ul style="list-style-type: none"><li><input type="radio"/> No</li><li><input type="radio"/> Probably no</li><li><input type="radio"/> Probably yes</li><li><input checked="" type="radio"/> Yes</li><li><input type="radio"/> Varies</li><li><input type="radio"/> Don't know</li></ul> | We did not look for studies assessing acceptability | The intervention is usually acceptable for clinicians, patients and health insurers. |

## Feasibility

Is the intervention feasible to implement?

| JUDGEMENT                                                                                                                                                    | RESEARCH EVIDENCE                                 | ADDITIONAL CONSIDERATIONS                                                                                                                        |
|--------------------------------------------------------------------------------------------------------------------------------------------------------------|---------------------------------------------------|--------------------------------------------------------------------------------------------------------------------------------------------------|
| <ul style="list-style-type: none"> <li>○ No</li> <li>○ Probably no</li> <li>○ Probably yes</li> <li>● Yes</li> <li>○ Varies</li> <li>○ Don't know</li> </ul> | We did not look for studies assessing feasibility | No elaborate training is required to implement positional therapy. Limited reimbursement, however, might impair the actual clinical application. |

## SUMMARY OF JUDGEMENTS

|                                             | JUDGEMENT                            |                                               |                                                                 |                                         |                         |               |                            |
|---------------------------------------------|--------------------------------------|-----------------------------------------------|-----------------------------------------------------------------|-----------------------------------------|-------------------------|---------------|----------------------------|
| PROBLEM                                     | No                                   | Probably no                                   | Probably yes                                                    | <b>Yes</b>                              |                         | Varies        | Don't know                 |
| DESIRABLE EFFECTS                           | Trivial                              | <b>Small</b>                                  | Moderate                                                        | Large                                   |                         | Varies        | Don't know                 |
| UNDESIRABLE EFFECTS                         | Large                                | Moderate                                      | <b>Small</b>                                                    | Trivial                                 |                         | Varies        | Don't know                 |
| CERTAINTY OF EVIDENCE                       | <b>Very low</b>                      | Low                                           | Moderate                                                        | High                                    |                         |               | No included studies        |
| VALUES                                      | Important uncertainty or variability | Possibly important uncertainty or variability | <b>Probably no important uncertainty or variability</b>         | No important uncertainty or variability |                         |               |                            |
| BALANCE OF EFFECTS                          | Favors the comparison                | Probably favors the comparison                | <b>Does not favor either the intervention or the comparison</b> | Probably favors the intervention        | Favors the intervention | Varies        | Don't know                 |
| RESOURCES REQUIRED                          | Large costs                          | Moderate costs                                | Negligible costs and savings                                    | Moderate savings                        | Large savings           | <b>Varies</b> | Don't know                 |
| CERTAINTY OF EVIDENCE OF REQUIRED RESOURCES | Very low                             | Low                                           | Moderate                                                        | High                                    |                         |               | <b>No included studies</b> |
| COST EFFECTIVENESS                          | Favors the comparison                | Probably favors the comparison                | Does not favor either the intervention or the comparison        | Probably favors the intervention        | Favors the intervention | Varies        | <b>No included studies</b> |
| EQUITY                                      | Reduced                              | Probably reduced                              | <b>Probably no impact</b>                                       | Probably increased                      | Increased               | Varies        | Don't know                 |

## JUDGEMENT

|               |    |             |              |     |  |        |            |
|---------------|----|-------------|--------------|-----|--|--------|------------|
| ACCEPTABILITY | No | Probably no | Probably yes | Yes |  | Varies | Don't know |
| FEASIBILITY   | No | Probably no | Probably yes | Yes |  | Varies | Don't know |

## TYPE OF RECOMMENDATION

|                                                     |                                                          |                                                                               |                                                      |                                                 |
|-----------------------------------------------------|----------------------------------------------------------|-------------------------------------------------------------------------------|------------------------------------------------------|-------------------------------------------------|
| Strong recommendation against the intervention<br>○ | Conditional recommendation against the intervention<br>○ | Conditional recommendation for either the intervention or the comparison<br>● | Conditional recommendation for the intervention<br>○ | Strong recommendation for the intervention<br>○ |
|-----------------------------------------------------|----------------------------------------------------------|-------------------------------------------------------------------------------|------------------------------------------------------|-------------------------------------------------|

## CONCLUSIONS

### Recommendation

We suggest either PT using vibratory devices or CPAP among adult patients with mild or moderate position-dependent OSA as defined by a supine AHI at least twice as high as the non-supine AHI and no relevant non-supine AHI (<15/h) (Conditional recommendation for either the intervention or CPAP, very low certainty of evidence).

### Justification

Based on five RCTs the panel determined that in patients with position-dependent OSA CPAP showed a slightly better effectiveness over PT, while the compliance on CPAP is somewhat lower. Clinically relevant differences in symptomatic relief (ESS) and HrQoL were not observed. The recommendation was restricted to the PT based on vibratory stimulation due to the limitation of adherence with other options.

### Subgroup considerations

It is difficult to compare the cost within Europe and its coverage varies across patients/ countries. Local differences of reimbursement still need to be investigated.

### Implementation considerations

Availability differs due to different healthcare systems.

### Monitoring and evaluation

Regular at least yearly follow-up with evaluation of adherence, symptoms, quality of life, efficacy (AHI, oxygenation), contraindications, side effects.

## Research priorities

More RCT in OSA patients are warranted with different degrees of sleep apnoea, including patients with higher degree of disease severity.



## PICO 7 APPENDICES

### PICO 7 Appendix 1

| Outcomes                                                                                                                 | Anticipated absolute effects <sup>†</sup> (95% CI)             |                                                         | Relative effect (95% CI) | № of participants (studies) | Certainty of the evidence (GRADE) | Comments                                                                                                                                                                                                                                                                                                                                                  |
|--------------------------------------------------------------------------------------------------------------------------|----------------------------------------------------------------|---------------------------------------------------------|--------------------------|-----------------------------|-----------------------------------|-----------------------------------------------------------------------------------------------------------------------------------------------------------------------------------------------------------------------------------------------------------------------------------------------------------------------------------------------------------|
|                                                                                                                          | Risk with CPAP                                                 | Risk with positional therapy (prevent supine)           |                          |                             |                                   |                                                                                                                                                                                                                                                                                                                                                           |
| Apnoea-hypopnoea index (AHI) assessed with: polysomnography or portable device<br>Scale from: 0 (best) to higher (worst) | The mean apnoea-hypopnoea index was <b>4.2</b> events/h        | mean <b>6.33 events/h more</b> (3.02 more to 9.65 more) | -                        | 71 (3 RCTs)                 | ⊕○○○<br>VERY LOW <sup>a,b</sup>   | Additionally Permut: intervention: decreased from median 11 events/h (9-15, 6-26) to median 2 (1-4, 0-8); control: decreased from median 11 events/hour (9-15, 6-26) to median 0 (0-2, 0-7); p < 0.001                                                                                                                                                    |
| Sleep efficiency assessed with: PSG<br>Scale from: 0 (worst) to 100 (best)                                               | The mean sleep efficiency was <b>84</b> %                      | mean <b>2 % lower</b> (0 to 0 )                         | -                        | 71 (3 RCTs)                 | ⊕○○○<br>VERY LOW <sup>a,b</sup>   | Additionally: Skinner 2 (2008): "No significant differences in sleep efficiency observed between treatments" - - - Permut: "There was no change in sleep efficiency noted with either treatment, from a baseline of 89% (79%-93%, 38%-97%) to 88% (82%-94%, 48%-98%) and 85% (72%-92%, 46%- 98%), with the PD and CPAP therapy, respectively (p = 0.17)." |
| Sleepiness assessed with: Epworth Sleepiness Scale<br>Scale from: 0 (best) to 24 (worst)                                 | The mean sleepiness was <b>10.4</b> points                     | mean <b>1.2 points higher</b> (3.9 lower to 4.5 higher) | -                        | 58 (1 RCT)                  | ⊕○○○<br>VERY LOW <sup>a,c</sup>   | Additionally Jokic: "Epworth Sleepiness Scale scores..., but were not significantly different between positional treatment (median, 10; range 1 to 19) and CPAP (median, 9; range, 2 to 17; median difference, 21.5; 95% CI, 22.9 to 0.8; p 5 0.2)."                                                                                                      |
| Health-related quality of life assessed with: Short Form 36 Physical Score<br>Scale from: 0 (worst) to 100 (best)        | The mean health-related quality of life was <b>44.6</b> points | mean <b>0.1 points higher</b> (2.6 lower to 2.9 higher) | -                        | 20 (1 RCT)                  | ⊕○○○<br>VERY LOW <sup>a,c</sup>   |                                                                                                                                                                                                                                                                                                                                                           |

| Outcomes                                                                                                                                                                                                                                                                                                 | Anticipated absolute effects <sup>c</sup> (95% CI)                  |                                                       | Relative effect (95% CI) | № of participants (studies) | Certainty of the evidence (GRADE) | Comments                                                                                                                                                                                                                                                                             |
|----------------------------------------------------------------------------------------------------------------------------------------------------------------------------------------------------------------------------------------------------------------------------------------------------------|---------------------------------------------------------------------|-------------------------------------------------------|--------------------------|-----------------------------|-----------------------------------|--------------------------------------------------------------------------------------------------------------------------------------------------------------------------------------------------------------------------------------------------------------------------------------|
|                                                                                                                                                                                                                                                                                                          | Risk with CPAP                                                      | Risk with positional therapy (prevent supine)         |                          |                             |                                   |                                                                                                                                                                                                                                                                                      |
| Compliance time (h/night) assessed with: diary-reported<br>Scale from: 0 (worst) to higher (better)                                                                                                                                                                                                      | The mean compliance time (h/night) was <b>4.9</b> h/night           | mean <b>2.5 h/night more</b> (1.3 more to 4.6 more)   | -                        | 71 (3 RCTs)                 | ⊕○○○<br>VERY LOW <sup>a,b</sup>   | Additionally Jokic: "Four patients preferred positional treatment, seven patients preferred CPAP treatment, and two had no preference." - - - Permut: Based on the questionnaire responses, 50% of patients preferred the PD, 34% preferred CPAP therapy, and 16% had no preference. |
| Adverse events (overall)<br>Assessed with: scores from responses to 19 self-report questions undertaken at the end of the period with each device (score 0, no effect; 1, mild effect but did not disturb sleep; 2, sleep disturbed; 3, could not use device).<br>Scale from: 0 (best) to higher (worst) | The mean adverse events (overall) was <b>8.4</b> points             | mean <b>3.6 points fewer</b> (3.4 fewer to 5.8 fewer) | -                        | 20 (1 RCT)                  | ⊕○○○<br>VERY LOW <sup>a,b</sup>   |                                                                                                                                                                                                                                                                                      |
| Energy level scores assessed with: Nottingham Health profile                                                                                                                                                                                                                                             | "Slightly better with CPAP than with positional therapy (p = 0.04)" |                                                       | -                        | 13 (1 RCT)                  | ⊕○○○<br>VERY LOW <sup>a,b</sup>   |                                                                                                                                                                                                                                                                                      |

- a. Downgraded one for study limitations: more than 2 domains high risk of bias.
- b. Downgraded two for imprecision: only 71 patients included, data not feasible to be analysed quantitatively.
- c. Downgraded two for imprecision: 95% CI suggest the possibility of both benefit and harm; only 71 patients included, data not feasible to be analysed quantitatively.

## PICO 7 Appendix 2

| Outcomes                                                                                                                                                                                                                                                                                                 | Importance | Certainty of the evidence (GRADE) |
|----------------------------------------------------------------------------------------------------------------------------------------------------------------------------------------------------------------------------------------------------------------------------------------------------------|------------|-----------------------------------|
| Apnoea-hypopnoea index<br>assessed with: polysomnography or portable device<br>Scale from: 0 (best) to higher (worst)                                                                                                                                                                                    | CRITICAL   | ⊕⊕○○<br>LOW <sup>a</sup>          |
| Sleep efficiency<br>assessed with: PSG<br>Scale from: 0 (worst) to 100 (best)                                                                                                                                                                                                                            | CRITICAL   | ⊕⊕○○<br>LOW <sup>a</sup>          |
| Sleepiness<br>assessed with: Epworth Sleepiness Scale<br>Scale from: 0 (best) to 24 (worst)                                                                                                                                                                                                              | CRITICAL   | ⊕○○○<br>VERY LOW <sup>b,c</sup>   |
| Health-related quality of life<br>assessed with: Short Form 36 Physical Score<br>Scale from: 0 (worst) to 100 (best)                                                                                                                                                                                     | CRITICAL   | ⊕○○○<br>VERY LOW <sup>b,c</sup>   |
| Energy level scores<br>assessed with: Nottingham Health profile                                                                                                                                                                                                                                          | CRITICAL   | ⊕○○○<br>VERY LOW <sup>a,b</sup>   |
| Compliance time (h/night)<br>assessed with: diary-reported<br>Scale from: 0 (worst) to higher (better)                                                                                                                                                                                                   | CRITICAL   | ⊕○○○<br>VERY LOW <sup>a,b</sup>   |
| Adverse events (overall)<br>assessed with: scores from responses to 19 self-report questions undertaken at the end of the period with each device (score 0, no effect; 1, mild effect but did not disturb sleep; 2, sleep disturbed; 3, could not use device).<br>Scale from: 0 (best) to higher (worst) | CRITICAL   | ⊕○○○<br>VERY LOW <sup>a,b</sup>   |

- a. Downgraded two for imprecision: only 71 patients included, data not feasible to be analysed quantitatively.
- b. Downgraded one for study limitations: more than 2 domains high risk of bias.
- c. Downgraded two for imprecision: 95% CI suggest the possibility of both benefit and harm; only 71 patients included, data not feasible to be analysed quantitatively.

**Table e19: PICO 8**

## QUESTION

| Should positional therapy (intervention) or custom made dual-block mandibular advancement devices (control) be used for adult patients with position-dependent obstructive sleep apnoea? |                                                                                                                                                                                    |
|------------------------------------------------------------------------------------------------------------------------------------------------------------------------------------------|------------------------------------------------------------------------------------------------------------------------------------------------------------------------------------|
| POPULATION:                                                                                                                                                                              | Adult patients with position-dependent obstructive sleep apnoea.                                                                                                                   |
| INTERVENTION:                                                                                                                                                                            | Positional therapy (intervention).                                                                                                                                                 |
| COMPARISON:                                                                                                                                                                              | Custom made dual-block mandibular advancement devices (control).                                                                                                                   |
| MAIN OUTCOMES:                                                                                                                                                                           | Apnoea-hypopnoea index (events/h); Sleep efficiency %; 4% oxygen desaturation index (events/h); Sleepiness ESS; Arterial hypertension; Adherence; Adverse events; Quality of life. |
| SETTING:                                                                                                                                                                                 |                                                                                                                                                                                    |
| PERSPECTIVE:                                                                                                                                                                             |                                                                                                                                                                                    |
| BACKGROUND:                                                                                                                                                                              |                                                                                                                                                                                    |
| CONFLICT OF INTERESTS:                                                                                                                                                                   |                                                                                                                                                                                    |

## ASSESSMENT

| Problem                                                                                                                                                                                                                                                                                         |                                                                                                                                                                                                                                                                                                                                                                                              |                                                                                                                                                     |
|-------------------------------------------------------------------------------------------------------------------------------------------------------------------------------------------------------------------------------------------------------------------------------------------------|----------------------------------------------------------------------------------------------------------------------------------------------------------------------------------------------------------------------------------------------------------------------------------------------------------------------------------------------------------------------------------------------|-----------------------------------------------------------------------------------------------------------------------------------------------------|
| Is the problem a priority?                                                                                                                                                                                                                                                                      |                                                                                                                                                                                                                                                                                                                                                                                              |                                                                                                                                                     |
| JUDGEMENT                                                                                                                                                                                                                                                                                       | RESEARCH EVIDENCE                                                                                                                                                                                                                                                                                                                                                                            | ADDITIONAL CONSIDERATIONS                                                                                                                           |
| <ul style="list-style-type: none"> <li><input type="radio"/> No</li> <li><input type="radio"/> Probably no</li> <li><input type="radio"/> Probably yes</li> <li><input checked="" type="radio"/> Yes</li> <li><input type="radio"/> Varies</li> <li><input type="radio"/> Don't know</li> </ul> | <p>Due to a high prevalence of CPAP non-adherence, there is a high demand for alternative therapies. Both mandibular advancement devices (MADs) and techniques to treat supine position - related obstructive sleep apnoea (positional OSA have n to have a potential to be an effective first or second line therapy. Therefore, a formal European recommendation is urgently required.</p> | <p>It is of interest not only to focus on AHI, but also on other outcome parameters, including quality of life, comorbidities, and oxygenation.</p> |

## Desirable Effects

How substantial are the desirable anticipated effects?

| JUDGEMENT                                                                                                                                                                                                                                                                                    | RESEARCH EVIDENCE             | ADDITIONAL CONSIDERATIONS                                                                                                                                                                                                    |
|----------------------------------------------------------------------------------------------------------------------------------------------------------------------------------------------------------------------------------------------------------------------------------------------|-------------------------------|------------------------------------------------------------------------------------------------------------------------------------------------------------------------------------------------------------------------------|
| <ul style="list-style-type: none"> <li><input type="radio"/> Trivial</li> <li><input checked="" type="radio"/> Small</li> <li><input type="radio"/> Moderate</li> <li><input type="radio"/> Large</li> <li><input type="radio"/> Varies</li> <li><input type="radio"/> Don't know</li> </ul> | <p><i>See Appendix 1.</i></p> | <p>Similar effectiveness documented for both therapies. Target population restricted to patients with positional OSA in those receiving positional therapy whereas all patient groups with OSA were considered for MADs.</p> |

## Undesirable Effects

How substantial are the undesirable anticipated effects?

| JUDGEMENT                                                                                                                                                                                                                                                                                    | RESEARCH EVIDENCE                                                                        | ADDITIONAL CONSIDERATIONS                                                                                                                                                                                                                                          |
|----------------------------------------------------------------------------------------------------------------------------------------------------------------------------------------------------------------------------------------------------------------------------------------------|------------------------------------------------------------------------------------------|--------------------------------------------------------------------------------------------------------------------------------------------------------------------------------------------------------------------------------------------------------------------|
| <ul style="list-style-type: none"> <li><input type="radio"/> Large</li> <li><input type="radio"/> Moderate</li> <li><input type="radio"/> Small</li> <li><input checked="" type="radio"/> Trivial</li> <li><input type="radio"/> Varies</li> <li><input type="radio"/> Don't know</li> </ul> | <p>Side effects were rare and mild for both therapies.</p> <p><i>See Appendix 1.</i></p> | <p>Side effects were slightly dominating for MAD. MAD related effects including salivation and changes in bite, craniofacial changes and temporomandibular problems. Positional therapy related to lower back/shoulder pain related to a fixed sleep position.</p> |

## Certainty of evidence

What is the overall certainty of the evidence of effects?

| JUDGEMENT                                                                                                                                                                                                                                                     | RESEARCH EVIDENCE                                                                  | ADDITIONAL CONSIDERATIONS                                                                  |
|---------------------------------------------------------------------------------------------------------------------------------------------------------------------------------------------------------------------------------------------------------------|------------------------------------------------------------------------------------|--------------------------------------------------------------------------------------------|
| <ul style="list-style-type: none"> <li><input checked="" type="radio"/> Very low</li> <li><input type="radio"/> Low</li> <li><input type="radio"/> Moderate</li> <li><input type="radio"/> High</li> <li><input type="radio"/> No included studies</li> </ul> | <p>The overall quality of evidence was very low.</p> <p><i>See Appendix 2.</i></p> | <p>There is a proportional lack of long term RCTs including various phenotypes of OSA.</p> |

## Values

Is there important uncertainty about or variability in how much people value the main outcomes?

| JUDGEMENT                                                                                                               | RESEARCH EVIDENCE | ADDITIONAL CONSIDERATIONS                                  |
|-------------------------------------------------------------------------------------------------------------------------|-------------------|------------------------------------------------------------|
| <ul style="list-style-type: none"> <li><input checked="" type="radio"/> Important uncertainty or variability</li> </ul> |                   | <p>Varies depending on the patient. Specifically these</p> |

|                                                                                                                                                                                                                  |  |                                                                      |
|------------------------------------------------------------------------------------------------------------------------------------------------------------------------------------------------------------------|--|----------------------------------------------------------------------|
| <ul style="list-style-type: none"> <li>○ Possibly important uncertainty or variability</li> <li>○ Probably no important uncertainty or variability</li> <li>○ No important uncertainty or variability</li> </ul> |  | differences relate to dominating symptom and existing comorbidities. |
|------------------------------------------------------------------------------------------------------------------------------------------------------------------------------------------------------------------|--|----------------------------------------------------------------------|

**Balance of effects**  
Does the balance between desirable and undesirable effects favor the intervention or the comparison?

| JUDGEMENT                                                                                                                                                                                                                                                                                                      | RESEARCH EVIDENCE                                                                                                        | ADDITIONAL CONSIDERATIONS                                                                                                                                                                                                                                                              |
|----------------------------------------------------------------------------------------------------------------------------------------------------------------------------------------------------------------------------------------------------------------------------------------------------------------|--------------------------------------------------------------------------------------------------------------------------|----------------------------------------------------------------------------------------------------------------------------------------------------------------------------------------------------------------------------------------------------------------------------------------|
| <ul style="list-style-type: none"> <li>○ Favors the comparison</li> <li>○ Probably favors the comparison</li> <li>● Does not favor either the intervention or the comparison</li> <li>○ Probably favors the intervention</li> <li>○ Favors the intervention</li> <li>○ Varies</li> <li>○ Don't know</li> </ul> | Selection of target group for treatment will influence desirable effects. Undesirable effects unrelated to target group. | Overall efficacy variable and there are few, if any, predictors or biomarkers other than body position and its relation to OSA that may be used to predict efficacy. Determination of desirable effects should beside conventional measures of OSA, include also sleepiness and HRQoL. |

**Resources required**  
How large are the resource requirements (costs)?

| JUDGEMENT                                                                                                                                                                                                                      | RESEARCH EVIDENCE                         | ADDITIONAL CONSIDERATIONS                                                                                                                                                                    |
|--------------------------------------------------------------------------------------------------------------------------------------------------------------------------------------------------------------------------------|-------------------------------------------|----------------------------------------------------------------------------------------------------------------------------------------------------------------------------------------------|
| <ul style="list-style-type: none"> <li>○ Large costs</li> <li>○ Moderate costs</li> <li>○ Negligible costs and savings</li> <li>○ Moderate savings</li> <li>○ Large savings</li> <li>● Varies</li> <li>○ Don't know</li> </ul> | We did not look for studies on resources. | There are huge differences between health care systems throughout Europe. There are unique reimbursement strategies. Therefore, no general statements on socioeconomic aspects can be given. |

**Certainty of evidence of required resources**  
What is the certainty of the evidence of resource requirements (costs)?

| JUDGEMENT | RESEARCH EVIDENCE | ADDITIONAL CONSIDERATIONS |
|-----------|-------------------|---------------------------|
|-----------|-------------------|---------------------------|

|                                                                                                                                                |                                           |                                                                                                                                                                                              |
|------------------------------------------------------------------------------------------------------------------------------------------------|-------------------------------------------|----------------------------------------------------------------------------------------------------------------------------------------------------------------------------------------------|
| <ul style="list-style-type: none"> <li>○ Very low</li> <li>○ Low</li> <li>○ Moderate</li> <li>○ High</li> <li>○ No included studies</li> </ul> | We did not look for studies on resources. | There are huge differences between health care systems throughout Europe. There are unique reimbursement strategies. Therefore, no general statements on socioeconomic aspects can be given. |
|------------------------------------------------------------------------------------------------------------------------------------------------|-------------------------------------------|----------------------------------------------------------------------------------------------------------------------------------------------------------------------------------------------|

## Cost effectiveness

Does the cost-effectiveness of the intervention favor the intervention or the comparison?

| JUDGEMENT                                                                                                                                                                                                                                                                                                               | RESEARCH EVIDENCE                                  | ADDITIONAL CONSIDERATIONS                                                                                                                                                                    |
|-------------------------------------------------------------------------------------------------------------------------------------------------------------------------------------------------------------------------------------------------------------------------------------------------------------------------|----------------------------------------------------|----------------------------------------------------------------------------------------------------------------------------------------------------------------------------------------------|
| <ul style="list-style-type: none"> <li>○ Favors the comparison</li> <li>○ Probably favors the comparison</li> <li>○ Does not favor either the intervention or the comparison</li> <li>○ Probably favors the intervention</li> <li>○ Favors the intervention</li> <li>○ Varies</li> <li>○ No included studies</li> </ul> | We did not look for studies on cost-effectiveness. | There are huge differences between health care systems throughout Europe. There are unique reimbursement strategies. Therefore, no general statements on socioeconomic aspects can be given. |

## Equity

What would be the impact on health equity?

| JUDGEMENT                                                                                                                                                                                                        | RESEARCH EVIDENCE                             | ADDITIONAL CONSIDERATIONS                                        |
|------------------------------------------------------------------------------------------------------------------------------------------------------------------------------------------------------------------|-----------------------------------------------|------------------------------------------------------------------|
| <ul style="list-style-type: none"> <li>○ Reduced</li> <li>● Probably reduced</li> <li>○ Probably no impact</li> <li>○ Probably increased</li> <li>○ Increased</li> <li>○ Varies</li> <li>○ Don't know</li> </ul> | We did not look for studies on health equity. | Different reimbursement policies apply depending on the country. |

## Acceptability

Is the intervention acceptable to key stakeholders?

| JUDGEMENT                                                                                                            | RESEARCH EVIDENCE                                    | ADDITIONAL CONSIDERATIONS                                        |
|----------------------------------------------------------------------------------------------------------------------|------------------------------------------------------|------------------------------------------------------------------|
| <ul style="list-style-type: none"> <li>○ No</li> <li>○ Probably no</li> <li>○ Probably yes</li> <li>● Yes</li> </ul> | We did not look for studies assessing acceptability. | Different reimbursement policies apply depending on the country. |

|                                                                                                                                                              |                                                    |                                                                  |
|--------------------------------------------------------------------------------------------------------------------------------------------------------------|----------------------------------------------------|------------------------------------------------------------------|
| <ul style="list-style-type: none"> <li>○ Varies</li> <li>○ Don't know</li> </ul>                                                                             |                                                    |                                                                  |
| <b>Feasibility</b>                                                                                                                                           |                                                    |                                                                  |
| Is the intervention feasible to implement?                                                                                                                   |                                                    |                                                                  |
| <b>JUDGEMENT</b>                                                                                                                                             | <b>RESEARCH EVIDENCE</b>                           | <b>ADDITIONAL CONSIDERATIONS</b>                                 |
| <ul style="list-style-type: none"> <li>○ No</li> <li>○ Probably no</li> <li>○ Probably yes</li> <li>● Yes</li> <li>○ Varies</li> <li>○ Don't know</li> </ul> | We did not look for studies assessing feasibility. | Different reimbursement policies apply depending on the country. |

## SUMMARY OF JUDGEMENTS

|                       | JUDGEMENT                                   |                                               |                                                                 |                                         |                         |               |                     |
|-----------------------|---------------------------------------------|-----------------------------------------------|-----------------------------------------------------------------|-----------------------------------------|-------------------------|---------------|---------------------|
| PROBLEM               | No                                          | Probably no                                   | Probably yes                                                    | <b>Yes</b>                              |                         | Varies        | Don't know          |
| DESIRABLE EFFECTS     | Trivial                                     | <b>Small</b>                                  | Moderate                                                        | Large                                   |                         | Varies        | Don't know          |
| UNDESIRABLE EFFECTS   | Large                                       | Moderate                                      | Small                                                           | <b>Trivial</b>                          |                         | Varies        | Don't know          |
| CERTAINTY OF EVIDENCE | <b>Very low</b>                             | Low                                           | Moderate                                                        | High                                    |                         |               | No included studies |
| VALUES                | <b>Important uncertainty or variability</b> | Possibly important uncertainty or variability | Probably no important uncertainty or variability                | No important uncertainty or variability |                         |               |                     |
| BALANCE OF EFFECTS    | Favors the comparison                       | Probably favors the comparison                | <b>Does not favor either the intervention or the comparison</b> | Probably favors the intervention        | Favors the intervention | Varies        | Don't know          |
| RESOURCES REQUIRED    | Large costs                                 | Moderate costs                                | Negligible costs and savings                                    | Moderate savings                        | Large savings           | <b>Varies</b> | Don't know          |
| CERTAINTY OF EVIDENCE | Very low                                    | Low                                           | Moderate                                                        | High                                    |                         |               | No included studies |



## JUDGEMENT

|                              |                       |                                |                                                          |                                  |                         |        |                     |
|------------------------------|-----------------------|--------------------------------|----------------------------------------------------------|----------------------------------|-------------------------|--------|---------------------|
| <b>OF REQUIRED RESOURCES</b> |                       |                                |                                                          |                                  |                         |        |                     |
| <b>COST EFFECTIVENESS</b>    | Favors the comparison | Probably favors the comparison | Does not favor either the intervention or the comparison | Probably favors the intervention | Favors the intervention | Varies | No included studies |
| <b>EQUITY</b>                | Reduced               | <b>Probably reduced</b>        | Probably no impact                                       | Probably increased               | Increased               | Varies | Don't know          |
| <b>ACCEPTABILITY</b>         | No                    | Probably no                    | Probably yes                                             | <b>Yes</b>                       |                         | Varies | Don't know          |
| <b>FEASIBILITY</b>           | No                    | Probably no                    | Probably yes                                             | <b>Yes</b>                       |                         | Varies | Don't know          |

## TYPE OF RECOMMENDATION

|                                                     |                                                          |                                                                                      |                                                      |                                                 |
|-----------------------------------------------------|----------------------------------------------------------|--------------------------------------------------------------------------------------|------------------------------------------------------|-------------------------------------------------|
| Strong recommendation against the intervention<br>○ | Conditional recommendation against the intervention<br>○ | <b>Conditional recommendation for either the intervention or the comparison</b><br>● | Conditional recommendation for the intervention<br>○ | Strong recommendation for the intervention<br>○ |
|-----------------------------------------------------|----------------------------------------------------------|--------------------------------------------------------------------------------------|------------------------------------------------------|-------------------------------------------------|

## CONCLUSIONS

### Recommendation

In patients with mild positional OSA, we suggest using either vibrational positional therapy or MAD (conditional recommendation for either the intervention or control, very low certainty of evidence).

### Justification

Based on only one RCT, the panel determined that in patients with mild positional OSA vibrational positional therapy and MAD show similar effectiveness. However, more side effects with MAD were found and adherence with the MAD was lower. For positional therapy, given different techniques and weak long-term adherence have to be taken into account. Patients' values and preferences may vary individually and may influence choosing for one or the other therapy.

### Subgroup considerations

Physical limitations (discomfort or pain at the level of the shoulders or back) for positional therapy users, bite and craniofacial changes as well as intermittent temporomandibular dysfunction precluding use of the MAD need to be taken into account when long-term treatment is established.

## Implementation considerations

Only applicable in patients with position dependent OSA patients.

There is evidence from comparative studies that vibration positional therapy may be effective in more severe cases.

## Monitoring and evaluation

Regular at least yearly follow-up with evaluation of adherence, symptoms, quality of life, efficacy (AHI, oxygenation), contraindications, side effects. Weight changes and age effects could alter position-dependency.

## Research priorities

Further RCTs are warranted in OSA patients with different degrees of sleep apnoea, including those with more severe disease. The definition of POSA has to be taken into account when comparing future studies.

## PICO 8 APPENDICES

### PICO 8 Appendix 1

| Outcomes                                                                                                                      | Anticipated absolute effects <sup>*</sup> (95% CI)                        |                                             | Relative effect (95% CI) | No of participants (studies) | Certainty of the evidence (GRADE) | Comments                                                                                                                                                                                                                                                                                                      |
|-------------------------------------------------------------------------------------------------------------------------------|---------------------------------------------------------------------------|---------------------------------------------|--------------------------|------------------------------|-----------------------------------|---------------------------------------------------------------------------------------------------------------------------------------------------------------------------------------------------------------------------------------------------------------------------------------------------------------|
|                                                                                                                               | Risk with custom made dual-block mandibular advancement devices (control) | Risk with positional therapy (intervention) |                          |                              |                                   |                                                                                                                                                                                                                                                                                                               |
| Apnoea-hypopnoea index (events/h) (AHI) assessed with: PSG at 12 months follow-up; ITT Scale from: 0 (best) to higher (worst) | see comment                                                               | see comment                                 | -                        | 99 (1 RCT)                   | ⊕⊕○○<br>LOW <sup>a</sup>          | Positional therapy: decrease from median 13.0 (IQR 9.7, 18.5) to median 8.0 (IQR 5.1, 12.9), p < 0.001 - - - - CPAP: decrease from median 11.7 (IQR 9.0, 16.2) to median 8.5 (IQR 4.8, 11.7), p < 0.001 - - - - between groups: not stat. sign. difference, no p-value given                                  |
| Sleep efficiency % assessed with: PSG at 12 months follow-up; ITT Scale from: 0 (worst) to 100 (best)                         | see comment                                                               | see comment                                 | -                        | 99 (1 RCT)                   | ⊕⊕○○<br>LOW <sup>a</sup>          | Positional therapy: decrease from baseline median 92.0 (IQR 84.0, 95.5) to median 91.0 (IQR 86.0,95.0), not stat. sign. - - - - CPAP: increase from baseline median 92.0 (IQR 86.0,95.0) to median 93.0 (IQR 87.0,96.0), not stat. sign. - - - - between group differences: not stat. sign., no numbers given |
| 4% oxygen desaturation index (events/h) (ODI) assessed with: PSG at 12 months follow-up; ITT                                  | see comment                                                               | see comment                                 | -                        | 99 (1 RCT)                   | ⊕⊕○○<br>LOW <sup>a</sup>          | Positional therapy: decrease from baseline median 10.5 (IQR 7.0,15.8) to median 7.0 (IQR 4.0,13.0), p < 0.001 - - - - CPAP: decrease from baseline median 9.0 (IQR 6.0,14.0) to median 7.0 (IQR 4.0,11.0), not stat. sign. - - - - between group difference: not stat. sign., no p-value given                |
| Sleepiness ESS assessed with: Epworth Sleepiness Scale at 12 months follow-up; ITT Scale from: 1 (best) to 24 (worst)         | see comment                                                               | see comment                                 | -                        | 99 (1 RCT)                   | ⊕○○○<br>VERY LOW <sup>a,b</sup>   | Positional therapy: decrease from baseline median 7.5 (IQR 4.0,12.0) to median 6.0 (IQR 3.8,10.0), not stat. sign. - - - - CPAP: decrease from baseline median 8.0 (IQR 4.0,13.0) to median 8.0 (IQR 3.0,12.5), not stat. sign. - - - - between group difference: not stat. sign., no p-value given           |

| Outcomes                                                                                                                                                         | Anticipated absolute effects* (95% CI)                                    |                                             | Relative effect (95% CI) | № of participants (studies) | Certainty of the evidence (GRADE) | Comments                                                                                                                                                                                                                                                                                                                                                                                                                                                                                                |
|------------------------------------------------------------------------------------------------------------------------------------------------------------------|---------------------------------------------------------------------------|---------------------------------------------|--------------------------|-----------------------------|-----------------------------------|---------------------------------------------------------------------------------------------------------------------------------------------------------------------------------------------------------------------------------------------------------------------------------------------------------------------------------------------------------------------------------------------------------------------------------------------------------------------------------------------------------|
|                                                                                                                                                                  | Risk with custom made dual-block mandibular advancement devices (control) | Risk with positional therapy (intervention) |                          |                             |                                   |                                                                                                                                                                                                                                                                                                                                                                                                                                                                                                         |
| Arterial hypertension assessed at 12 months follow-up; ITT; systolic above 140mmHg and diastolic above 90mmHg                                                    | see comment                                                               | see comment                                 | -                        | 99 (1 RCT)                  | ⊕⊕○○<br>LOW <sup>a</sup>          | Systolic: positional: decrease from median 133.5 (IQR 125.0,150.0) to 130.0 (IQR 120.0,150.0), not stat. sign. - CPAP: decrease from median 130.0 (IQR 120.0,140.0) to 128.0 (IQR 120.0,138.0), not stat. sign. - between group difference: not stat. sign., no p-value given - diastolic: positional: decrease from median 90.0 (IQR 80.0,97.5) to median 82.5 (IQR 80.0,97.3), p<0.05 - CPAP: decrease from median 85.0 (IQR 80.0,90.0) to median 80.0 (IQR 80.0,86.0), not stat. sign. - no gr-d     |
| Adherence assessed with: temperature measuring chip, objectively, at 12 months follow-up; defined as device usage ≥ 4 h/night on at least 5 days/week; ITT       | see comment                                                               | see comment                                 | -                        | 99 (1 RCT)                  | ⊕⊕○○<br>LOW <sup>a</sup>          | Positional therapy: mean 68.9 ± 37.7 % patients - - - - CPAP: mean 54.5 ± 44.5 % patients - - - - between group difference: not stat. sign. p-value: 0.086                                                                                                                                                                                                                                                                                                                                              |
| Adverse events assessed with: self-reported until 12 months of follow-up; data from pts not dropped out (per protocol): 29 in each arm                           | see comment                                                               | see comment                                 | -                        | 58 (1 RCT)                  | ⊕○○○<br>VERY LOW <sup>a,b</sup>   | Reporting at least one AE: positional: 20 patients (69 %) - CPAP: 28 patients (96.6 %) - positional therapy specific AEs: woken up by vibration: 4 patients (10.8 %); no reaction to vibration: 4 patients (10.8 %) - CPAP specific AEs: tooth pain: 21 (27.3 %); temporomandibular dysfunction: 9 (11.7 %); open bite: 7 (9.1 %); dry mouth 4 (5.2 %); hypersalivation: 1 (1.3 %); dental fracture: 1 (1.3 %); oral lesions: 1 (1.3 %) - both groups: persistent snoring, tiredness, comfort problems, |
| Quality of life assessed with: Functional Outcomes of Sleep Questionnaire (FOSQ-30) at 12 months follow-up; ITT Scale from: 5 (worse) to 20 (better functioning) | see comment                                                               | see comment                                 | -                        | 99 (1 RCT)                  | ⊕○○○<br>VERY LOW <sup>a,b</sup>   | Positional therapy: increase from baseline median 19.0 (IQR 17.3,19.7) to median 19.3 (IQR 17.2,19.7), not stat. sign. - - - - CPAP: decrease from baseline median 18.4 (IQR 16.2,19.7) to median 18.3 (IQR 16.3,19.6), not stat. sign. - - - - between group difference: not sign., no p-value given                                                                                                                                                                                                   |

- a. Minus two for imprecision for limited number of patients and unclear direction of result (benefit or harm included possibilities).
- b. Minus one for study limitations: patients not blinded, subjective outcome.

## PICO 8 Appendix 2

| Outcomes                                                                                                                                                               | Importance | Certainty of the evidence (GRADE) |
|------------------------------------------------------------------------------------------------------------------------------------------------------------------------|------------|-----------------------------------|
| Apnoea-hypopnoea index (events/h)<br>assessed with: PSG at 12 months follow-up; ITT<br>Scale from: 0 (best) to higher (worst)                                          | CRITICAL   | ⊕⊕○○<br>LOW <sup>a</sup>          |
| Sleep efficiency %<br>assessed with: PSG at 12 months follow-up; ITT<br>Scale from: 0 (worst) to 100 (best)                                                            | CRITICAL   | ⊕⊕○○<br>LOW <sup>a</sup>          |
| 4% oxygen desaturation index (events/h)<br>assessed with: PSG at 12 months follow-up; ITT                                                                              | CRITICAL   | ⊕⊕○○<br>LOW <sup>a</sup>          |
| Sleepiness ESS<br>assessed with: Epworth Sleepiness Scale at 12 months follow-up; ITT<br>Scale from: 1 (best) to 24 (worst)                                            | CRITICAL   | ⊕○○○<br>VERY LOW <sup>a,b</sup>   |
| Arterial hypertension<br>assessed with: PSG at 12 months follow-up; ITT; systolic above 140mmHg and diastolic above 90mmHg                                             | CRITICAL   | ⊕⊕○○<br>LOW <sup>a</sup>          |
| Adherence<br>assessed with: temperature measuring chip, objectively, at 12 months follow-up; defined as device usage ≥ 4 h/night on at least 5 days/week; ITT          | CRITICAL   | ⊕⊕○○<br>LOW <sup>a</sup>          |
| Adverse events<br>assessed with: self-reported until 12 months of follow-up; data from pts not dropped out (per protocol): 29 in each arm                              | CRITICAL   | ⊕○○○<br>VERY LOW <sup>a,b</sup>   |
| Quality of life<br>assessed with: Functional Outcomes of Sleep Questionnaire (FOSQ-30) at 12 months follow-up; ITT<br>Scale from: 5 (worse) to 20 (better functioning) | CRITICAL   | ⊕○○○<br>VERY LOW <sup>a,b</sup>   |

- a. Minus two for imprecision for limited number of patients and unclear direction of result (benefit or harm included possibilities).  
b. Minus one for study limitations: patients not blinded, subjective outcome.

## References

1. Dixon JB, Schachter LM, O'Brien PE, Jones K, Grima M, Lambert G, et al. Surgical vs conventional therapy for weight loss treatment of obstructive sleep apnea: a randomized controlled trial. *JAMA*. 2012;308(11):1142-9.
2. Joosten SA, Khoo JK, Edwards BA, Landry SA, Naughton MT, Dixon JB, et al. Improvement in Obstructive Sleep Apnea With Weight Loss is Dependent on Body Position During Sleep. *Sleep*. 2017;40(5):doi: 10.1093/sleep/zsx047.
3. Aarab G, Lobbezoo F, Hamburger HL, Naeije M. Oral appliance therapy versus nasal continuous positive airway pressure in obstructive sleep apnea: a randomized, placebo-controlled trial. *Respiration*. 2011;81(5):411-9.
4. Aarab G, Lobbezoo F, Heymans MW, Hamburger HL, Naeije M. Long-term follow-up of a randomized controlled trial of oral appliance therapy in obstructive sleep apnea. *Respiration*. 2011;82(2):162-8.
5. Aarab G, Nikolopoulou M, Ahlberg J, Heymans MW, Hamburger HL, de Lange J, et al. Oral appliance therapy versus nasal continuous positive airway pressure in obstructive sleep apnea: a randomized, placebo-controlled trial on psychological distress. *Clin Oral Investig*. 2017;21(7):2371-8.
6. Nikolopoulou M, Byraki A, Ahlberg J, Heymans MW, Hamburger HL, De Lange J, et al. Oral appliance therapy versus nasal continuous positive airway pressure in obstructive sleep apnoea syndrome: a randomised, placebo-controlled trial on self-reported symptoms of common sleep disorders and sleep-related problems. *J Oral Rehabil*. 2017;44(6):452-60.
7. Barnes M, McEvoy RD, Banks S, Tarquinio N, Murray CG, Vowles N, et al. Efficacy of positive airway pressure and oral appliance in mild to moderate obstructive sleep apnea. *Am J Respir Crit Care Med* 2004;170(6):656-64.
8. Dal-Fabbro C, Garbuio S, D'Almeida V, Cintra FD, Tufik S, Bittencourt L. Mandibular advancement device and CPAP upon cardiovascular parameters in OSA. *Sleep Breath*. 2014;18(4):749-59.
9. de Vries GE, Hoekema A, Claessen J, Stellingsma C, Stegenga B, Kerstjens HAM, et al. Long-Term Objective Adherence to Mandibular Advancement Device Therapy Versus Continuous Positive Airway Pressure in Patients With Moderate Obstructive Sleep Apnea. *J Clin Sleep Med*. 2019;15(11):1655-63.
10. de Vries GE, Hoekema A, Vermeulen KM, Claessen J, Jacobs W, van der Maten J, et al. Clinical- and Cost-Effectiveness of a Mandibular Advancement Device Versus Continuous Positive Airway Pressure in Moderate Obstructive Sleep Apnea. *J Clin Sleep Med*. 2019;15(10):1477-85.
11. El-Solh AA, Homish GG, Ditursi G, Lazarus J, Rao N, Adamo D, et al. A Randomized Crossover Trial Evaluating Continuous Positive Airway Pressure Versus Mandibular Advancement Device on Health Outcomes in Veterans With Posttraumatic Stress Disorder. *J Clin Sleep Med* 2017;13(11):1327-35.
12. Ferguson KA, Ono T, Lowe AA, al-Majed S, Love LL, Fleetham JA. A short-term controlled trial of an adjustable oral appliance for the treatment of mild to moderate obstructive sleep apnoea. *Thorax*. 1997;52(4):362-8.

13. Gagnadoux F, Fleury B, Vielle B, Petelle B, Meslier N, N'Guyen XL, et al. Titrated mandibular advancement versus positive airway pressure for sleep apnoea. *Eur Respir J*. 2009;34(4):914-20.
14. Trzepizur W, Gagnadoux F, Abraham P, Rousseau P, Meslier N, Saumet JL, et al. Microvascular endothelial function in obstructive sleep apnea: Impact of continuous positive airway pressure and mandibular advancement. *Sleep Med*. 2009;10(7):746-52.
15. Glos M, Fietze I, Schoebel C, Blau A, Garcia C, Platzek M. Therapy of OSA by mandibular advancement device therapy-effects of a crossover trial of SomnoDent and CPAP on respiration and daytime cardiac autonomic function. *J Sleep Res*. 2016a;Conference: 23rd Congress of the European Sleep Research Society, ESRS 2016. Italy. Conference Start: 20160913. Conference End: 20160916. 25:168.
16. Glos M, Penzel T, Schoebel C, Nitzsche GR, Zimmermann S, Rudolph C, et al. Comparison of effects of OSA treatment by MAD and by CPAP on cardiac autonomic function during daytime. *Sleep Breath*. 2016b;20(2):635-46.
17. Doff MH, Veldhuis SK, Hoekema A, Slater JJ, Wijkstra PJ, de Bont LG, et al. Long-term oral appliance therapy in obstructive sleep apnea syndrome: a controlled study on temporomandibular side effects. *Clin Oral Investig*. 2012;16(3):689-97.
18. Hoekema A, Stegenga B, Wijkstra PJ, van der Hoeven JH, Meinesz AF, de Bont LG. Obstructive sleep apnea therapy. *J Dent Res*. 2008;87(9):882-7.
19. Doff MH, Hoekema A, Wijkstra PJ, van der Hoeven JH, Huddleston Slater JJ, de Bont LG, et al. Oral appliance versus continuous positive airway pressure in obstructive sleep apnea syndrome: a 2-year follow-up. *Sleep*. 2013;36(9):1289-96.
20. Phillips CL, Grunstein RR, Darendeliler MA, Mihailidou AS, Srinivasan VK, Yee BJ, et al. Health outcomes of continuous positive airway pressure versus oral appliance treatment for obstructive sleep apnea: a randomized controlled trial. *Am J Respir Crit Care Med* 2013;187(8):879-87.
21. Schutz TC, Cunha TC, Moura-Guimaraes T, Luz GP, Ackel-D'Elia C, Alves Eda S, et al. Comparison of the effects of continuous positive airway pressure, oral appliance and exercise training in obstructive sleep apnea syndrome. *Clinics*. 2013;68(8):1168-74.
22. Tan YK, L'Estrange PR, Luo YM, Smith C, Grant HR, Simonds AK, et al. Mandibular advancement splints and continuous positive airway pressure in patients with obstructive sleep apnoea: a randomized cross-over trial. *Eur J Orthodont*. 2002;24(3):239-49.
23. Yamamoto U, Nishizaka M, Tsuda H, Tsutsui H, Ando SI. Crossover comparison between CPAP and mandibular advancement device with adherence monitor about the effects on endothelial function, blood pressure and symptoms in patients with obstructive sleep apnea. *Heart and vessels*. 2019;34(10):1692-702.
24. Barnes M, Collins AL, Smart K, Worsnop C, O'Donoghue F. Short term outcomes for obstructive sleep apnoea patients treated with hypoglossal nerve stimulation. *J Sleep Res*. 2014;23:66.
25. Smart K, O'Donoghue F, Worsnop C, Collins A, Barnes M. Short term outcomes for obstructive sleep apnoea patients treated with hypoglossal nerve stimulation. *Sleep Biol Rhythms* 2013;11(Suppl S2):68-9.



26. Strollo PJ, Soose RJ, Maurer JT, de Vries N, Cornelius J, Froymovich O, et al. Upper-Airway Stimulation for Obstructive Sleep Apnea. *N Engl J Med*. 2014;370(2):139-49.
27. Woodson BT, Gillespie MB, Soose RJ, Maurer JT, de Vries N, Steward DL, et al. Randomized controlled withdrawal study of upper airway stimulation on OSA: short- and long-term effect. *Otolaryngol Head Neck Surg*. 2014;151(5):880-7.
28. Pengo MF, Xiao S, Ratneswaran C, Reed K, Shah N, Chen T, et al. Randomised sham-controlled trial of transcutaneous electrical stimulation in obstructive sleep apnoea. *Thorax*. 2016b;71(10):923-31.
29. Campbell T, Pengo MF, Steier J. Patients' preference of established and emerging treatment options for obstructive sleep apnoea. *J Thorac Dis*. 2015;7(5):938-42.
30. Diaferia G, Badke L, Santos-Silva R, Bommarito S, Tufik S, Bittencourt L. Effect of speech therapy as adjunct treatment to continuous positive airway pressure on the quality of life of patients with obstructive sleep apnea. *Sleep Med*. 2013;14(7):628-35.
31. Diaferia G, Santos-Silva R, Truksinas E, Haddad FLM, Santos R, Bommarito S, et al. Myofunctional therapy improves adherence to continuous positive airway pressure treatment. *Sleep Breath*. 2017;21(2):387-95.
32. Guimarães KC, Drager LF, Genta PR, Marcondes BF, Lorenzi-Filho G. Effects of oropharyngeal exercises on patients with moderate obstructive sleep apnea syndrome. *Am J Respir Crit Care Med* 2009;179(10):962-6.
33. Ieto V, Kayamori F, Montes MI, Hirata RP, Gregorio MG, Alencar AM, et al. Effects of Oropharyngeal Exercises on Snoring: A Randomized Trial. *Chest*. 2015;148(3):683-91.
34. Neumannova K, Hobzova M, Sova M, Prasko J. Pulmonary rehabilitation and oropharyngeal exercises as an adjunct therapy in obstructive sleep apnea: a randomized controlled trial. *Sleep Med*. 2018;52:92-7.
35. Puhan MA, Suarez A, Lo Cascio C, Zahn A, Heitz M, Braendli O. Didgeridoo playing as alternative treatment for obstructive sleep apnoea syndrome: randomised controlled trial. *BMJ*. 2006;332(7536):266-70.
36. Randerath WJ, Galetke W, Domanski U, Weitkunat R, Ruhle KH. Tongue-muscle training by intraoral electrical neurostimulation in patients with obstructive sleep apnea. *Sleep*. 2004;27(2):254-9.
37. Torres-Castro R, Vilaró J, Martí J-D, Garmendia O, Gimeno-Santos E, Romano-Andrioni B, et al. Effects of a Combined Community Exercise Program in Obstructive Sleep Apnea Syndrome: A Randomized Clinical Trial. *J Clin Med*. 2019;8(3):361.
38. Atilgan E, Kunter E, Algun ZC. Are oropharyngeal exercises effective in Obstructive Sleep Apnea Syndrome? *J Back Musculoskelet Rehabil*. 2020;33(2):209-16.
39. Lin HY, Chang CJ, Chiang CC, Su PL, Lin CY, Hung CH. Effects of a comprehensive physical therapy on moderate and severe obstructive sleep apnea- a preliminary randomized controlled trial. *J Formos Med Assoc*. 2020;119(12):1781-90.
40. Lojander J, Maasilta P, Partinen M, Brander PE, Salmi T, Lehtonen H. Nasal-CPAP, surgery, and conservative management for treatment of obstructive sleep apnea syndrome. A randomized study. *Chest*. 1996;110(1):114-9.
41. Vicini C, Dallan I, Campanini A, De Vito A, Barbanti F, Giorgiomarrano G, et al. Surgery vs ventilation in adult severe obstructive sleep apnea syndrome. *Am J Otolaryngol*. 2010;31(1):14-20.

42. Eskandari D, Zou D, Karimi M, Stenlof K, Grote L, Hedner J. Zonisamide reduces obstructive sleep apnoea: a randomised placebo-controlled study. *Eur Respir J Open Res.* 2014;44(1):140-9.
43. Latshang TD, Nussbaumer-Ochsner Y, Henn RM, Ulrich S, Lo Cascio CM, Ledergerber B, et al. Effect of acetazolamide and autoCPAP therapy on breathing disturbances among patients with obstructive sleep apnea syndrome who travel to altitude: a randomized controlled trial. *JAMA.* 2012;308(22):2390-8.
44. Nussbaumer-Ochsner Y, Latshang TD, Ulrich S, Kohler M, Thurnheer R, Bloch KE. Patients with obstructive sleep apnea syndrome benefit from acetazolamide during an altitude sojourn: a randomized, placebo-controlled, double-blind trial. *Chest.* 2012;141(1):131-8.
45. Latshang TD, Kaufmann B, Nussbaumer-Ochsner Y, Ulrich S, Furian M, Kohler M, et al. Patients with Obstructive Sleep Apnea Have Cardiac Repolarization Disturbances when Travelling to Altitude: Randomized, Placebo-Controlled Trial of Acetazolamide. *Sleep.* 2016;39(9):1631-7.
46. Ulrich S, Nussbaumer-Ochsner Y, Vasic I, Hasler E, Latshang TD, Kohler M, et al. Cerebral oxygenation in patients with OSA: effects of hypoxia at altitude and impact of acetazolamide. *Chest.* 2014;146(2):299-308.
47. Whyte KF, Gould GA, Airlie MA, Shapiro CM, Douglas NJ. Role of protriptyline and acetazolamide in the sleep apnea/hypopnea syndrome. *Sleep.* 1988;11(5):463-72.
48. Winslow DH, Bowden CH, DiDonato KP, McCullough PA. A randomized, double-blind, placebo-controlled study of an oral, extended-release formulation of phentermine/topiramate for the treatment of obstructive sleep apnea in obese adults. *Sleep.* 2012;35(11):1529-39.
49. Jokic R, Klimaszewski A, Crossley M, Sridhar G, Fitzpatrick MF. Positional treatment vs continuous positive airway pressure in patients with positional obstructive sleep apnea syndrome. *Chest.* 1999;115(3):771-81.
50. Permut I, Diaz-Abad M, Chatila W, Crocetti J, Gaughan JP, D'Alonzo GE, et al. Comparison of positional therapy to CPAP in patients with positional obstructive sleep apnea. *J Clin Sleep Med* 2010;6(3):238-43.
51. Skinner MA, Kingshott RN, Jones DR, Taylor DR. Lack of efficacy for a cervicomandibular support collar in the management of obstructive sleep apnea. *Chest.* 2004a;125(1):118-26.
52. Skinner MA, Kingshott RN, Filsell S, Taylor DR. Efficacy of the 'tennis ball technique' versus nCPAP in the management of position-dependent obstructive sleep apnoea syndrome. *Respirology (Carlton, Vic).* 2008;13(5):708-15.
53. Skinner MA, Kingshott RN, Jones DR, Homan SD, Taylor DR. Elevated posture for the management of obstructive sleep apnea. *Sleep Breath.* 2004b;8(4):193-200.
54. Berry RB, Uhles ML, Abaluck BK, Winslow DH, Schweitzer PK, Gaskins RA, Jr., et al. NightBalance Sleep Position Treatment Device Versus Auto-Adjusting Positive Airway Pressure for Treatment of Positional Obstructive Sleep Apnea. *J Clin Sleep Med.* 2019;15(7):947-56.

55. Mok Y, Tan A, Hsu PP, Seow A, Chan YH, Wong HS, et al. Comparing treatment effects of a convenient vibratory positional device to CPAP in positional OSA: a crossover randomised controlled trial. *Thorax*. 2020;75(4):331-7.
56. de Ruiter MHT, Benoist LBL, de Vries N, de Lange J. Durability of treatment effects of the Sleep Position Trainer versus oral appliance therapy in positional OSA: 12-month follow-up of a randomized controlled trial. *Sleep Breath*. 2017:1-10.
57. Benoist L, de Ruiter M, de Lange J, de Vries N. A randomized, controlled trial of positional therapy versus oral appliance therapy for position-dependent sleep apnea. *Sleep Med*. 2017;34:109-17.
